# Supplementary material for: Genome-guided isolation of Fervidibacter sacchari, an aerobic, hyperthermophilic polysaccharide-degrading specialist
Source: Research Square preprint supplement (doi:10.21203/rs.3.rs-3760178/v1), 2024-01-10
Supplement: Supplementary file 1 [file 8c6208cdcecda827d57bc92d.xlsx]

## Sheet: Table S1. Thermophiles
Table S1. Comparison of phenotypic characteristics and annotated CAZymes using dbCAN3 between F. sacchari PD1T and selected thermophilic polysaccharide-degrading prokaryotes.
	Fervidibacter sacchari PD1	Caldicellulosiruptor bescii DSM6725	Dictyoglomus turgidum DSM6724	Geobacillus sp. WSUCF1	Kallotenue papyrolyticum JKG1	Pyrococcus furiosus DSM3638	Saccharolobus solfataricus DSM1616	Sulfolobus acidocaldarius DSM639	Thermotoga maritima MSB8
Taxonomic order	Fervidibacterales	Thermoanaero-bacteriales	Dictyoglomales	Bacillales	Kallotenuales	Thermococcales	Sulfolobales	Sulfolobales	Thermotogales
Topt (°C)	80	75	80	60	55	100	87	70-75	80
Metabolism	Aerobic Respiration, Fermentation	Fermentation	Fermentation	Aerobic Respiration, Fermentation	Aerobic Respiration	Fermentation	Aerobic Respiration	Aerobic Respiration	Fermentation
Habitats	Terrestrial	Terrestrial	Terrestrial	Terrestrial	Terrestrial	Marine	Terrestrial	Terrestrial	Marine
Crystalline cellulose degradation	Yes	Yes	No	No	Yes	No	Yes	No	No
Primary cellulases	Unknown	CelA	None	None	Unknown	None	sso1354	Unknown	None
Cell attachment	None known	SLH domains, tāpirins, pili	None known	None known	None known	None known	AraS, GlcS, TreS	None known	None known
#CBM domains (#genes w/ at least 1 CBM domain)	11 (10)	36 (24)	14 (10)	11 (10)	23 (12)	4 (4)	2 (2)	2 (2)	15 (10)
#GH domains (#genes w/ at least 1 GH domain)	120 (117)	70 (61)	62 (62)	28 (28)	81 (78)	20 (20)	32 (31)	12 (12)	54 (54)
#GH families	49	34	35	18	37	10	17	7	31
#Total CAZymes	191	112	105	72	204	48	69	42	83
#GH4	0	2	5	1	0	0	0	0	2
#GH109	5	1	1	0	0	0	0	0	0
#GH177	14	1	0	0	3	0	1	0	2
#GH179	12	2	0	1	5	1	2	0	1
RefSeq assembly	GCF_030520105.1	GCF_000022325.1	GCF_000021645.1	GCF_000422025.1	GCF_000526415.1	GCF_008245085.1	GCF_900079115.1	GCF_000012285.1	GCF_000230655.2
References	This study	[49,50]	[51,52]	[53-55]	[17]	[56,57]	[58-60]	[61]	[62]

## Sheet: Table S2. KEGG modules
Table S2. KEGG module completion for F. sacchari PD1T and selected genomes in the Fervidibacteria and Armatimonadota.
		M00001 : Glycolysis (Embden-Meyerhof pathway), glucose => pyruvate	M00001 : Glycolysis (Embden-Meyerhof pathway), glucose => pyruvate	M00001 : Glycolysis (Embden-Meyerhof pathway), glucose => pyruvate	M00001 : Glycolysis (Embden-Meyerhof pathway), glucose => pyruvate	M00001 : Glycolysis (Embden-Meyerhof pathway), glucose => pyruvate	M00001 : Glycolysis (Embden-Meyerhof pathway), glucose => pyruvate	M00001 : Glycolysis (Embden-Meyerhof pathway), glucose => pyruvate	M00001 : Glycolysis (Embden-Meyerhof pathway), glucose => pyruvate	M00001 : Glycolysis (Embden-Meyerhof pathway), glucose => pyruvate	M00001 : Glycolysis (Embden-Meyerhof pathway), glucose => pyruvate	M00001 : Glycolysis (Embden-Meyerhof pathway), glucose => pyruvate	M00001 : Glycolysis (Embden-Meyerhof pathway), glucose => pyruvate	M00001 : Glycolysis (Embden-Meyerhof pathway), glucose => pyruvate	M00001 : Glycolysis (Embden-Meyerhof pathway), glucose => pyruvate	M00001 : Glycolysis (Embden-Meyerhof pathway), glucose => pyruvate	M00001 : Glycolysis (Embden-Meyerhof pathway), glucose => pyruvate	M00001 : Glycolysis (Embden-Meyerhof pathway), glucose => pyruvate	M00001 : Glycolysis (Embden-Meyerhof pathway), glucose => pyruvate	M00001 : Glycolysis (Embden-Meyerhof pathway), glucose => pyruvate	M00001 : Glycolysis (Embden-Meyerhof pathway), glucose => pyruvate	M00001 : Glycolysis (Embden-Meyerhof pathway), glucose => pyruvate	M00001 : Glycolysis (Embden-Meyerhof pathway), glucose => pyruvate	M00001 : Glycolysis (Embden-Meyerhof pathway), glucose => pyruvate	M00001 : Glycolysis (Embden-Meyerhof pathway), glucose => pyruvate	M00001 : Glycolysis (Embden-Meyerhof pathway), glucose => pyruvate	M00001 : Glycolysis (Embden-Meyerhof pathway), glucose => pyruvate	M00001 : Glycolysis (Embden-Meyerhof pathway), glucose => pyruvate	M00001 : Glycolysis (Embden-Meyerhof pathway), glucose => pyruvate	M00001 : Glycolysis (Embden-Meyerhof pathway), glucose => pyruvate	M00001 : Glycolysis (Embden-Meyerhof pathway), glucose => pyruvate	M00001 : Glycolysis (Embden-Meyerhof pathway), glucose => pyruvate	M00001 : Glycolysis (Embden-Meyerhof pathway), glucose => pyruvate	M00002 : Glycolysis, core module involving three-carbon compounds	M00002 : Glycolysis, core module involving three-carbon compounds	M00002 : Glycolysis, core module involving three-carbon compounds	M00002 : Glycolysis, core module involving three-carbon compounds	M00002 : Glycolysis, core module involving three-carbon compounds	M00002 : Glycolysis, core module involving three-carbon compounds	M00002 : Glycolysis, core module involving three-carbon compounds	M00002 : Glycolysis, core module involving three-carbon compounds	M00002 : Glycolysis, core module involving three-carbon compounds	M00002 : Glycolysis, core module involving three-carbon compounds	M00002 : Glycolysis, core module involving three-carbon compounds	M00002 : Glycolysis, core module involving three-carbon compounds	M00002 : Glycolysis, core module involving three-carbon compounds	M00004 : Pentose phosphate pathway (Pentose phosphate cycle)	M00004 : Pentose phosphate pathway (Pentose phosphate cycle)	M00004 : Pentose phosphate pathway (Pentose phosphate cycle)
Classification	Genome identifier	M00001	K00134	K00150	K00844	K00845	K00850	K00873	K00886	K00918	K00927	K01623	K01624	K01689	K01803	K01810	K01834	K06859	K08074	K11389	K11645	K12406	K12407	K13810	K15633	K15634	K15635	K15916	K16305	K16306	K16370	K21071	K25026	M00002	K00134	K00150	K00873	K00927	K01689	K01803	K01834	K11389	K12406	K15633	K15634	K15635	M00004	K00033	K00036
Bacteria;Armatimonadota;Fervidibacteriia;Fervidibacterales;Thermosaccharophagaceae;Thermosaccharophagus;DRYI01 sp025062195	DRYI01	0.888889	1	0	0	3	1	1	0	0	1	0	0	1	2	0	0	1	0	0	0	0	0	0	0	0	1	1	0	0	0	1	0	1	1	0	1	1	1	2	0	0	0	0	0	1	0.5	0	0
Bacteria;Armatimonadota;Fervidibacteriia;Fervidibacterales;Thermosaccharophagaceae;Thermosaccharophagus;Thermosaccharophagus tengchongensis	DRTY-6.bins.49.201901	0.888889	1	0	0	3	1	1	0	0	1	0	0	1	2	0	0	1	0	0	0	0	0	0	0	0	1	1	0	0	0	1	0	1	1	0	1	1	1	2	0	0	0	0	0	1	0.5	0	0
Bacteria;Armatimonadota;Fervidibacteriia;Fervidibacterales;Thermosaccharophagaceae;Thermosaccharophagus;Thermosaccharophagus tengchongensis	DRTY-6.bins.54.TC_201808	0.888889	1	0	0	3	1	1	0	0	1	0	0	1	2	0	0	1	0	0	0	0	0	0	0	0	1	1	0	0	0	1	0	1	1	0	1	1	1	2	0	0	0	0	0	1	0.5	0	0
Bacteria;Armatimonadota;Fervidibacteriia;Fervidibacterales;Thermosaccharophagaceae;Thermosaccharophagus;Thermosaccharophagus tengchongensis	3300000866-4_JzSedJan11	0.888889	1	0	0	3	1	1	0	0	1	0	0	1	2	0	0	1	0	0	0	0	0	0	0	0	1	1	0	0	0	1	0	1	1	0	1	1	1	2	0	0	0	0	0	1	0.5	0	0
Bacteria;Armatimonadota;Fervidibacteriia;Fervidibacterales;Thermosaccharophagaceae;Thermosaccharophagus;Thermosaccharophagus yellowstonensis	GEM.WASH546-9.OTU-14628	1	1	0	0	3	1	1	0	0	1	0	1	1	1	0	0	1	0	0	0	0	0	0	0	1	1	0	0	0	0	1	0	1	1	0	1	1	1	1	0	0	0	0	1	1	0.333333	0	0
Bacteria;Armatimonadota;Fervidibacteriia;Fervidibacterales;Thermosaccharophagaceae;Thermosaccharophagus;Thermosaccharophagus gerlachensis	GEM.GBS139-22.OTU-2994	1	1	0	0	3	1	1	0	0	1	0	1	1	1	0	0	1	0	0	0	0	0	0	0	0	1	0	0	0	0	1	0	1	1	0	1	1	1	1	0	0	0	0	0	1	0.5	0	0
Bacteria;Armatimonadota;Fervidibacteriia;Fervidibacterales;Fervidibacteraceae;Caldisaccharidevorator;Caldisaccharidevorator malaysiensis	GCA_025057575.1	0.888889	1	0	0	2	1	1	0	0	1	0	0	2	2	0	0	0	0	0	0	0	0	0	0	1	1	0	0	1	0	1	0	1	1	0	1	1	2	2	0	0	0	0	1	1	0.666667	1	0
Bacteria;Armatimonadota;Fervidibacteriia;Fervidibacterales;Fervidibacteraceae;Caldisaccharidevorator;Caldisaccharidevorator sinensis	QQ.bins.37	0.888889	1	0	0	2	1	1	0	0	1	0	0	2	1	0	0	0	0	0	1	0	0	0	0	0	1	0	0	0	0	1	0	1	1	0	1	1	2	1	0	0	0	0	0	1	0.666667	1	1
Bacteria;Armatimonadota;Fervidibacteriia;Fervidibacterales;Fervidibacteraceae;Caldisaccharidevorator;Caldisaccharidevorator sinensis	QQ.bins.50	0.888889	1	0	0	2	1	1	0	0	1	0	0	2	1	0	0	0	0	0	1	0	0	0	0	0	1	0	0	0	0	1	0	1	1	0	1	1	2	1	0	0	0	0	0	1	0.666667	1	1
Bacteria;Armatimonadota;Fervidibacteriia;Fervidibacterales;Fervidibacteraceae;Caldisaccharidevorator;Caldisaccharidevorator sinensis	QQ.bins.212	0.888889	1	0	0	3	1	1	0	0	1	0	0	2	1	0	0	0	0	0	1	0	0	0	0	0	1	0	0	0	0	1	0	1	1	0	1	1	2	1	0	0	0	0	0	1	0.666667	1	1
Bacteria;Armatimonadota;Fervidibacteriia;Fervidibacterales;Fervidibacteraceae;Fervidibacter;Fervidibacter sp. 2	JZ-2.bins.7.201901	0.888889	1	0	0	3	1	1	0	0	1	0	0	1	2	0	0	0	0	0	1	0	0	0	0	0	1	0	0	0	0	1	0	1	1	0	1	1	1	2	0	0	0	0	0	1	0.833333	1	1
Bacteria;Armatimonadota;Fervidibacteriia;Fervidibacterales;Fervidibacteraceae;Fervidibacter;Fervidibacter sp. 2	QQ.bins.148.TC_201808	1	1	0	0	3	1	2	0	0	1	0	0	1	2	0	0	1	0	0	1	0	0	0	0	0	1	0	0	0	0	1	0	1	1	0	2	1	1	2	0	0	0	0	0	1	0.666667	1	1
Bacteria;Armatimonadota;Fervidibacteriia;Fervidibacterales;Fervidibacteraceae;Fervidibacter;Fervidibacter sp. 7	3300020139-18_Ga0197143	1	1	0	0	2	1	1	0	0	1	0	0	2	2	0	0	1	0	0	1	0	0	0	0	0	1	0	0	0	0	1	0	1	1	0	1	1	2	2	0	0	0	0	0	1	0.666667	1	1
Bacteria;Armatimonadota;Fervidibacteriia;Fervidibacterales;Fervidibacteraceae;Fervidibacter;Fervidibacter sp. 8	3300025345-2_Ga020966	1	1	0	0	4	1	1	0	0	1	0	0	2	1	0	0	2	0	0	1	0	0	0	0	0	1	0	0	0	0	1	0	1	1	0	1	1	2	1	0	0	0	0	0	1	0.833333	1	1
Bacteria;Armatimonadota;Fervidibacteriia;Fervidibacterales;Fervidibacteraceae;Fervidibacter;Fervidibacter sacchari	F_sacchari	1	1	0	0	2	1	1	0	0	1	0	0	1	2	0	0	1	0	0	1	0	0	0	0	0	1	0	0	0	0	1	0	1	1	0	1	1	1	2	0	0	0	0	0	1	0.666667	1	1
Bacteria;Armatimonadota;Fervidibacteriia;Fervidibacterales;Fervidibacteraceae;Fervidibacter;Fervidibacter sacchari	Fervidi_bin.004_G1-10	1	1	0	0	2	1	1	0	0	1	0	0	1	2	0	0	1	0	0	1	0	0	0	0	0	2	0	0	0	1	1	0	1	1	0	1	1	1	2	0	0	0	0	0	2	0.666667	1	2
Bacteria;Armatimonadota;Fervidibacteriia;Fervidibacterales;Fervidibacteraceae;Fervidibacter;Fervidibacter japonicus	Fervidibacter_HRBIN17	0.888889	1	0	0	3	1	1	0	0	1	0	0	1	2	0	0	1	0	0	0	0	0	0	0	0	1	0	0	0	0	1	0	1	1	0	1	1	1	2	0	0	0	0	0	1	0.833333	1	1
Bacteria;Armatimonadota;Fervidibacteriia;Fervidibacterales;Fervidibacteraceae;Fervidibacter;Fervidibacter sinensis	DRTY-8.bins.1	1	1	0	0	3	1	1	0	0	1	0	1	1	2	0	0	1	0	0	1	0	0	0	0	0	1	0	0	0	0	1	0	1	1	0	1	1	1	2	0	0	0	0	0	1	0.666667	1	1
Bacteria;Armatimonadota;Fervidibacteriia;Fervidibacterales;Fervidibacteraceae;Fervidibacter;Fervidibacter sinensis	DRTY-8.bins.21.TC_201808	1	1	0	0	3	1	1	0	0	1	0	1	1	2	0	0	1	0	0	1	0	0	0	0	0	1	0	0	0	0	1	0	1	1	0	1	1	1	2	0	0	0	0	0	1	0.666667	1	1
Bacteria;Armatimonadota;Fervidibacteriia;Fervidibacterales;Fervidibacteraceae;Fervidibacter;Fervidibacter sinensis	GMQP.bins.3	1	1	0	0	3	1	1	0	0	1	0	1	1	1	0	0	1	0	0	1	0	0	0	0	0	1	0	0	0	0	1	0	1	1	0	1	1	1	1	0	0	0	0	0	1	0.666667	1	1
Bacteria;Armatimonadota;Fervidibacteriia;Fervidibacterales;Fervidibacteraceae;Fervidibacter;Fervidibacter sinensis	ZMQP.bins.5	1	1	0	0	3	1	1	0	0	1	0	1	1	2	0	0	1	0	0	1	0	0	0	0	0	1	0	0	0	0	1	0	1	1	0	1	1	1	2	0	0	0	0	0	1	0.666667	1	1
Bacteria;Armatimonadota;Fervidibacteriia;Fervidibacterales;Fervidibacteraceae;Fervidibacter;Fervidibacter sinensis	DRTY-6.bins.59.TC_20180	0.888889	0	0	0	4	1	1	0	0	2	0	1	1	2	0	0	1	0	0	1	0	0	0	0	0	1	0	0	0	0	1	0	0.8	0	0	1	2	1	2	0	0	0	0	0	1	0.666667	1	1
Bacteria;Armatimonadota;Fervidibacteriia;Fervidibacterales;Fervidibacteraceae;Fervidibacter;Fervidibacter sinensis	GMQP.bins.2.TC_201808	0.888889	0	0	0	3	1	1	0	0	1	0	1	1	1	0	0	1	0	0	1	0	0	0	0	0	1	0	0	0	0	1	0	0.8	0	0	1	1	1	1	0	0	0	0	0	1	0.666667	1	1
Bacteria;Armatimonadota;Fervidibacteriia;Fervidibacterales;Fervidibacteraceae;Fervidibacter;Fervidibacter sinensis	GMQP.bins.67.201901	1	1	0	0	3	1	1	0	0	1	0	1	1	2	0	0	1	0	0	1	0	0	0	0	0	1	0	0	0	0	1	0	1	1	0	1	1	1	2	0	0	0	0	0	1	0.666667	1	1
Bacteria;Armatimonadota;Fervidibacteriia;Fervidibacterales;Fervidibacteraceae;Fervidibacter;Fervidibacter canadensis	GEM.DC094-13.OTU-248	1	1	0	0	3	1	1	0	0	1	0	0	1	2	0	0	1	0	0	1	0	0	0	0	0	1	0	0	0	0	1	0	1	1	0	1	1	1	2	0	0	0	0	0	1	0.666667	2	1
Bacteria;Armatimonadota;Fervidibacteriia;Fervidibacterales;Fervidibacteraceae;Fervidibacter;Fervidibacter canadensis	3300025105-17_Ga0209479	0.888889	1	0	0	3	1	1	0	0	1	0	0	2	2	0	0	0	0	0	1	0	0	0	0	0	1	0	0	0	0	1	0	1	1	0	1	1	2	2	0	0	0	0	0	1	0.666667	1	1
Bacteria;Armatimonadota;Fervidibacteriia;Fervidibacterales;Fervidibacteraceae;Fervidibacter;Fervidibacter canadensis	GEM.DC775-14.OTU-248	1	1	0	0	3	1	1	0	0	1	0	0	1	2	0	0	1	0	0	1	0	0	0	0	0	1	0	0	0	0	1	0	1	1	0	1	1	1	2	0	0	0	0	0	1	0.666667	1	1
Bacteria;Armatimonadota;Abditibacteriia;Abditibacteriales;Abditibacteriaceae;Abditibacterium;Abditibacterium utsteinense	A_usteinense	0.888889	1	0	0	0	1	1	0	0	1	1	2	1	1	1	0	0	0	0	0	0	0	0	1	0	0	0	0	0	0	1	0	1	1	0	1	1	1	1	0	0	0	1	0	0	0.833333	1	1
Bacteria;Armatimonadota;Armatimonadia;Armatimonadales;Armatimonadaceae;Armatimonas;Armatimonas rosea	A_rosea	1	1	0	0	4	1	1	1	0	1	0	1	1	2	1	2	0	0	0	0	0	0	0	0	0	0	0	0	0	0	1	0	1	1	0	1	1	1	2	2	0	0	0	0	0	0.666667	1	1
Bacteria;Armatimonadota;Armatimonadia;Armatimonadales;Capsulimonadaceae;Capsulimonas;Capsulimonas corticalis	C_corticalis	1	2	0	0	4	1	1	0	0	1	1	2	1	2	1	1	0	0	0	0	0	0	0	0	0	1	0	0	0	0	1	0	1	2	0	1	1	1	2	1	0	0	0	0	1	1	2	1
Bacteria;Armatimonadota;CAIYQO01;CAIYQO01;CAIYQO01;CAIYQO01;CAIYQO01 sp903928345	CAIYQO01	1	2	0	0	3	1	1	0	0	1	0	2	1	1	1	0	0	0	0	0	0	0	0	1	2	2	0	0	0	0	0	0	1	2	0	1	1	1	1	0	0	0	1	2	2	1	1	1
Bacteria;Armatimonadota;CAIYQO01;GCA-020354555;CP070648;CP070648;CP070648 sp020354555	CP070648	1	1	0	0	2	5	1	0	0	1	0	1	1	2	0	0	1	0	0	1	0	0	0	0	2	2	1	0	0	0	3	0	1	1	0	1	1	1	2	0	0	0	0	2	2	0.666667	0	0
Bacteria;Armatimonadota;CAIYQO01;WVXJ01;DTIZ01;S016-27;S016-27 sp015486155	WVXJ01	1	1	0	0	3	2	1	0	0	1	0	1	1	2	0	0	0	0	0	1	0	0	0	0	0	2	1	0	0	0	2	0	1	1	0	1	1	1	2	0	0	0	0	0	2	0.666667	1	0
Bacteria;Armatimonadota;UBA5829;DTJY01;DTJY01;JAGONM01;JAGONM01 sp017993055	DTJY01	0.888889	1	0	0	4	1	1	0	0	1	0	3	2	2	0	0	0	0	0	0	0	0	0	0	0	2	0	0	0	1	1	0	1	1	0	1	1	2	2	0	0	0	0	0	2	0.5	0	0
Bacteria;Armatimonadota;Fimbriimonadia;Chthonomonadales;Chthonomonadaceae;Chthonomonas;Chthonomonas calidirosea	C_caldirosea	1	1	0	0	2	1	1	0	0	1	0	2	1	2	1	1	0	0	0	1	0	0	0	0	1	1	1	0	0	1	1	0	1	1	0	1	1	1	2	1	0	0	0	1	1	1	1	2
Bacteria;Armatimonadota;Fimbriimonadia;Fimbriimonadales;Fimbriimonadaceae;Fimbriimonas;Fimbriimonas ginsengisoli	F_ginsengisoli	1	1	0	0	2	2	1	0	0	1	0	1	1	2	2	3	1	0	0	1	0	0	1	0	2	1	1	0	0	0	2	0	1	1	0	1	1	1	2	3	0	0	0	2	1	1	1	2
Bacteria;Armatimonadota;HRBIN16;HRBIN16;HRBIN16;HRBIN16;HRBIN16 sp023511455	HRBIN16	1	1	0	0	3	1	1	0	0	1	0	2	1	2	0	0	0	0	0	0	0	0	0	0	1	2	1	0	0	0	0	0	1	1	0	1	1	1	2	0	0	0	0	1	2	1	1	1
Bacteria;Armatimonadota;JADLDR01;JADLDR01;JADLDR01;JADLDR01;JADLDR01 sp020846535	JADLDR01	1	1	0	0	3	1	1	0	0	1	0	3	1	2	2	0	0	0	0	1	0	0	1	0	0	2	0	0	0	1	1	0	1	1	0	1	1	1	2	0	0	0	0	0	2	0.833333	2	2
Bacteria;Armatimonadota;UBA10988;UBA10988;UBA10988;UBA10988;UBA10988 sp016235455	UBA10988	1	1	0	0	2	1	1	0	0	1	0	2	1	1	1	0	0	0	0	1	0	0	0	1	0	0	0	0	0	0	1	0	1	1	0	1	1	1	1	0	0	0	1	0	0	0.833333	1	1
Bacteria;Armatimonadota;UBA5377;UBA1398;UBA1398;UBA1398;UBA1398 sp002305165	UBA1398	1	1	0	0	5	1	1	0	0	1	0	1	1	2	1	0	0	0	0	0	0	0	0	0	0	1	0	0	0	0	1	0	1	1	0	1	1	1	2	0	0	0	0	0	1	1	1	1
Bacteria;Armatimonadota;UBA5377;UBA5377;UBA5352;UBA5352;UBA5352 sp002411015	UBA5377	0.888889	1	0	0	4	2	1	1	0	1	0	3	1	2	0	0	0	0	0	1	0	0	0	1	0	1	0	0	1	0	1	0	1	1	0	1	1	1	2	0	0	0	1	0	1	0.833333	1	1
Bacteria;Armatimonadota;UBA5829;UBA5829;UBA5829;UBA5829;UBA5829 sp021371935	UBA5829	1	1	0	0	1	2	1	0	0	1	1	1	1	2	1	0	0	0	0	0	0	0	0	0	0	2	0	0	0	0	0	0	1	1	0	1	1	1	2	0	0	0	0	0	2	0.666667	0	0
[truncated: 837 more columns]

## Sheet: Table S3. dbCAN3 annotation
Table S3. F. sacchari PD1T CAZyme annotations based on dbCAN3.
Gene ID	Name	EC#	Consensus	HMMER	dbCAN_sub	DIAMOND	SignalP v.6.0	SP(Sec/SPI)	LIPO(Sec/SPII)	TAT(Tat/SPI)	TATLIPO(Sec/SPII)	PILIN(Sec/SPIII)	CS Position
WP_020249805.1	Fsa08945	-	GH172	GH172(92-334)	GH172_e0	GH172	SP	0.83257	0.000158	0.000167	0.000135	0.000124	CS pos: 27-28. Pr: 0.2255
WP_020250119.1	Fsa09805	2.4.1.319|2.4.1.320	GH130_2	GH130_2(23-319)	GH130_e13	GH130	None	0	0	0	0	0
WP_259092072.1	Fsa14515	4.2.2.3	PL15	PL15(494-623)	PL15_e6	PL15	SP	0.665971	0.000188	0.000109	0.000117	0.0001	CS pos: 19-20. Pr: 0.3951
WP_259092243.1	Fsa14760	-	GH140	GH140(102-516)	GH140_e2	GH140	None	0	0	0	0	0
WP_259092278.1	Fsa14810	3.2.1.-	GH38	GH38(10-275)	GH38_e12	GH38	None	0	0	0	0	0
WP_259092450.1	Fsa15175	-	PL35	PL35(373-546)	PL35_e5	PL35	None	2e-06	0	0	0	0
WP_259092593.1	Fsa15405Xyn	3.2.1.37|3.2.1.55|3.2.1.21	GH3	GH3(78-304)	GH3_e88	GH3	None	0	0	0	0	0
WP_259092667.1	Fsa15500	3.2.1.158	GH96	GH96(19-586)	GH96_e0	GH96	None	0.315573	0.000771	0.000218	0.000299	0.000207
WP_259092775.1	Fsa15650	-	PL11_1	PL11_1(18-551)	PL11_e1	PL11	SP	0.999309	0.000146	0.000151	0.000127	0.00012	CS pos: 17-18. Pr: 0.9816
WP_259092851.1	Fsa15735	3.2.1.-|3.2.1.63	GH95	GH95(30-777)	GH95_e1	GH95	TAT	0	0	1.00003	0	0	CS pos: 24-25. Pr: 0.9495
WP_259093347.1	Fsa16295Glu	-	GH50	GH50(89-443)	GH50_e17	GH50	TAT	0	3e-06	0.66666	0.333337	0	CS pos: 29-30. Pr: 0.3395
WP_259094154.1	Fsa17940	-	PL11	PL11(190-467)	PL11_e4	PL11	SP	0.996892	0.002252	0.000225	0.000181	0.000182	CS pos: 24-25. Pr: 0.9788
WP_259094556.1	Fsa07530	3.2.1.111|3.2.1.51|-	GH29+CBM32	GH29(30-326)+CBM32(340-441)	GH29_e30+CBM32_e126	GH29	None	0	0	0	0	0
WP_259094673.1	Fsa07045	3.2.1.51	GH151	GH151(27-157)	GH151_e0	GH151	None	0	0	0	0	0
WP_259094735.1	Fsa06860	-	GT5	GT5(33-504)	GT5_e43	GT5	None	0	0	0	0	0
WP_259094861.1	Fsa06375	3.2.1.22	GH36	GH36(75-675)	GH36_e27	GH36	None	0	0	0	0	0
WP_259094964.1	Fsa05935	-	GH35	GH35(38-352)	GH35_e21	GH35	None	0	0	0	0	0
WP_259094976.1	Fsa05870	-	GT4	GT4(166-319)	GT4_e3552	GT4	None	0	0	0	0	0
WP_259095017.1	Fsa05685	-	GH5_36	GH5_36(43-322)	GH5_e166	GH5_36	TAT	0	0	1	0	0	CS pos: 24-25. Pr: 0.9199
WP_259095125.1	Fsa05235	3.2.1.51	GH29	GH29(31-383)	GH29_e53	GH29	SP	0.999331	0.000138	0.000154	0.000116	0.00012	CS pos: 20-21. Pr: 0.9746
WP_259095154.1	Fsa05130	-	GH116+CBM38	CBM38(300-422)+GH116(741-1106)	CBM38_e8+GH116_e7	CBM38+GH116	None	0	0	0	0	0
WP_259095199.1	Fsa05030	-	GH163	GH163(219-476)	GH163_e8	GH163	SP	0.99917	0.000165	0.000174	0.000141	0.000137	CS pos: 28-29. Pr: 0.7529
WP_259095313.1	Fsa04715	3.2.1.-|3.2.1.4	GH148+CBM4+GH148	GH148(81-237)+CBM4(292-423)+GH148(495-615)	GH148_e2+CBM4_e25+GH148_e5	CBM4+GH148	None	1.7e-05	0	0	0	0
WP_259095481.1	Fsa11645	3.2.1.25	GH2	GH2(23-729)	GH2_e111	GH2	None	0	0	0	0	0
WP_259095759.1	Fsa12335	-	GH29+CBM32	GH29(34-340)+CBM32(448-558)	GH29_e71+CBM32_e126	CBM32+GH29	SP	0.665385	0.333982	0.000148	0.00013	0.000139	CS pos: 24-25. Pr: 0.5794
WP_259096022.1	Fsa13040	-	GH51_1	GH51_1(243-492)	GH51_e48	GH51	SP	0.830812	0.000202	0.000187	0.000154	0.000162	CS pos: 19-20. Pr: 0.7861
WP_259096129.1	Fsa13280	-	GH29	GH29(14-349)	GH29_e45	GH29	TAT	0	0	0.999985	0	0	CS pos: 26-27. Pr: 0.8585
WP_259096206.1	Fsa13450	-	GH141	GH141(511-709)	GH141_e24	GH0	SP	0.999194	0.000155	0.000175	0.000142	0.000141	CS pos: 24-25. Pr: 0.9782
WP_259096252.1	Fsa13550	-	CE19	CE19(72-391)	CE15_e17	CE0	None	0	0	0	0	0
WP_259096416.1	Fsa13895	-	GH123	GH123(1033-1281)	GH123_e13	GH0	SP	0.999371	0.000127	0.000142	0.000116	0.00011	CS pos: 20-21. Pr: 0.9817
WP_259096514.1	Fsa04205	-	GH141	GH141(24-319)	GH141_e24	CBM51+CBM6	SP	0.999247	0.000146	0.000155	0.000134	0.000126	CS pos: 20-21. Pr: 0.9720
WP_259096608.1	Fsa03955	-	GH5	GH5(411-687)	GH5_e310	GH5	SP	0.999363	0.000128	0.000142	0.000114	0.000117	CS pos: 16-17. Pr: 0.9828
WP_259096683.1	Fsa03735	-	GT51	GT51(67-241)	GT51_e132	GT51	None	0	0	0	0	0
WP_259096693.1	Fsa03710	-	CE20	CE20(110-224)+CE20(425-555)	CE20_e33	CE20	None	0.336675	0.16669	2.1e-05	2.1e-05	1.9e-05
WP_259096732.1	Fsa03605	3.2.1.40	CE15	CE15(48-433)	CE15_e10	CE15	None	0.499606	0.000114	7.6e-05	7.8e-05	6.6e-05
WP_259096774.1	Fsa03500	-	GH130_9	GH130_9(5-303)	GH130_e3	GH130	None	0	0	0	0	0
WP_259096957.1	Fsa03015	3.2.1.-|3.2.1.4	GH148+GH148	GH148(75-229)+GH148(321-446)	GH148_e2+GH148_e5	CBM4+GH148	LIPO	0.168302	0.83162	1.9e-05	1.7e-05	1.5e-05	CS pos: 20-21. Pr: 0.7862
WP_259097012.1	Fsa02885	-	GH99	GH99(45-333)	GH99_e3	GH99	None	0.000166	0	0	0	0
WP_259097434.1	Fsa02495	-	PL22+PL22	PL22(29-153)+PL22_2(185-367)	PL22_e5+PL22_e6	PL22	None	0	0	0	0	0
WP_259097438.1	Fsa02490Xyn	3.2.1.8	GH10	GH10(77-384)	GH10_e77	GH10	TAT	0	0	0.833322	0.166677	0	CS pos: 27-28. Pr: 0.4062
WP_259097761.1	Fsa02275	-	GH141	GH141(31-556)	GH141_e24	GH141	SP	0.999241	0.000157	0.000165	0.000134	0.000125	CS pos: 24-25. Pr: 0.9798
WP_259097775.1	Fsa02270	4.2.2.23|4.2.2.24	PL11	PL11(31-635)	PL11_e0	PL11_1	SP	0.664488	0.167418	0.000345	0.000304	0.000265	CS pos: 26-27. Pr: 0.3266
WP_259097856.1	Fsa02175	-	PL10_3	PL10_3(120-397)	PL10_e12	PL10_3	LIPO	0.166537	0.833391	2.4e-05	2.2e-05	2e-05	CS pos: 24-25. Pr: 0.8268
WP_259098036.1	Fsa01980	3.2.1.-	N	GH146(266-543)	GH127_e5	CBM13	SP	0.998902	0.000236	0.00021	0.000181	0.000172	CS pos: 17-18. Pr: 0.9732
WP_259098422.1	Fsa10845	-	GH148	GH148(250-395)	GH148_e6	GH148	None	2.8e-05	0	0	0	0
WP_259098440.1	Fsa10835	-	GT2+GT2	GT2(254-423)+GT2(542-627)	GT2+GT2	GT2	None	0	0	0	0	0
WP_259098948.1	Fsa10345	-	GH106	GH106(213-763)	GH106_e18	GH106	SP	0.999359	0.000131	0.000143	0.000113	0.000115	CS pos: 22-23. Pr: 0.9831
WP_259099404.1	Fsa09920	3.2.1.21|3.2.1.38|3.2.1.-	GH1	GH1(5-446)	GH1_e107	GH1	None	0	0	0	0	0
WP_259099601.1	Fsa09750	-	CE19	CE19(39-370)	CE19_e3	CE19	SP	0.999159	0.000171	0.000167	0.00014	0.000136	CS pos: 15-16. Pr: 0.9693
WP_259099696.1	Fsa09545	3.2.1.40	GH78+CBM67	CBM67(6-202)+GH78(445-962)	CBM67_e24+GH78_e71	CBM67+GH78	None	0	0	0	0	0
WP_259100530.1	Fsa00760	3.2.1.40|-	GH78+CBM67+CBM67	CBM67(163-315)+CBM67(329-492)+GH78(516-1019)	CBM67_e12+CBM67_e28+GH78_e24	CBM67+GH78	SP	0.998999	0.000211	0.000217	0.000165	0.000181	CS pos: 19-20. Pr: 0.9792
WP_259100608.1	Fsa00675	-	GH127	GH127(56-560)	GH127_e8	GH127	TAT	0	0	1.00001	0	0	CS pos: 25-26. Pr: 0.8196
WP_259100749.1	Fsa00475	3.2.1.177	GH31_3	GH31_3(238-580)	GH31_e31	GH31	None	0	0	0	0	0
WP_259100774.1	Fsa00410	3.2.1.23	GH2	GH2(38-673)	GH2_e112	GH2	LIPO	0.332842	0.666824	8.1e-05	8.6e-05	7.7e-05	CS pos: 17-18. Pr: 0.6484
WP_259100967.1	Fsa08600	-	GH129	GH129(17-608)	GH129_e2	GH0	SP	0.999016	0.000209	0.000192	0.000167	0.00015	CS pos: 17-18. Pr: 0.8307
WP_259101012.1	Fsa08500	2.4.1.18	GH13_9+CBM48	CBM48(174-251)+GH13_9(324-623)	CBM48_e2+GH13_e200	CBM48+GH13_9	None	0	0	0	0	0
WP_259101386.1	Fsa11100	-	GH106	GH106(26-711)	GH106_e34	GH106	None	0	0	0	0	0
WP_259101603.1	Fsa11315	-	GH133	GH133(285-644)	GH133_e2	GH133	None	0	0	0	0	0
WP_259101730.1	Fsa11540Glu	-	GH50	GH50(299-675)	GH50_e2	GH50	SP	0.999281	0.000144	0.000161	0.000126	0.000129	CS pos: 23-24. Pr: 0.9812
WP_259101733.1	Fsa11545	-	GH167	GH167(313-1011)	GH167_e1	GH167	SP	0.999315	0.000138	0.000161	0.00012	0.000121	CS pos: 22-23. Pr: 0.9832
WP_259101925.1	Fsa01670Gal	3.2.1.23	GH147	GH147(24-778)	GH147_e0	GH147	SP	0.999112	0.000168	0.00019	0.000153	0.000163	CS pos: 21-22. Pr: 0.9771
WP_259102076.1	Fsa00980	-	GH106+CBM67	GH106(4-732)+CBM67(944-1098)	GH106_e6+CBM67_e25	GH106	None	0	0	0	0	0
WP_259102287.1	Fsa00150	-	GH29	GH29(14-333)	GH29_e51	GH29	SP	0.594831	0.000119	9.7e-05	8.5e-05	7.6e-05	CS pos: 12-13. Pr: 0.5773
WP_018195210.1	Fsa13150	-	GT2	GT2(4-130)	GT2	N	None	0	0	0	0	0
WP_018195875.1	Fsa04270	-	GH109	GH109(1-177)	GH109_e5	N	None	0	0	0	0	0
WP_018196171.1	Fsa15495	-	GH179	GH179(15-142)	GH109_e7	N	None	0	0	0	0	0
WP_259091799.1	Fsa14045	-	GT2	GT2(7-135)	GT2	N	None	0	0	0	0	0
WP_259091805.1	Fsa14060	3.2.1.-	GH20	GH20(610-848)	GH20_e47	N	SP	0.999324	0.000139	0.000149	0.000125	0.000121	CS pos: 18-19. Pr: 0.9788
WP_259091833.1	Fsa14150	-	GH33	GH33(19-300)	GH33_e124	N	None	0	0	0	0	0
WP_259091949.1	Fsa14320	-	GH51_10	GH51_10(37-413)	GH51_e28	N	SP	0.91918	0.080282	0.000156	0.000113	0.000121	CS pos: 18-19. Pr: 0.8963
WP_259092186.1	Fsa14695	-	GT2	GT2(11-143)	GT2	N	None	0	0	0	0	0
WP_259092235.1	Fsa14750	-	GH16_3	GH16_3(72-320)	GH16_e326	N	None	0.333083	5.5e-05	4.4e-05	3.6e-05	3.6e-05
WP_259092347.1	Fsa14980	-	GH15	GH15(289-630)	GH15_e6	N	None	0	0	0	0	0
WP_259092360.1	Fsa15010	-	GT2	GT2(12-144)	GT2	N	None	0	0	0	0	0
WP_259092441.1	Fsa15170	-	GT83	GT83(7-507)	GT83_e35	N	None	0.012019	2.6e-05	2e-05	1.4e-05	1.5e-05
WP_259092473.1	Fsa15220	-	CE19	CE19(68-341)	CE19_e4	N	None	0	0	0	0	0
WP_259092515.1	Fsa15280	-	GT4	GT4(197-350)	GT4_e2592	N	None	0	0	0	0	0
WP_259092588.1	Fsa15395	-	GH20	GH20(380-659)	GH20_e41	N	None	0.480594	0.000126	0.000115	9.1e-05	8.8e-05
WP_259092724.1	Fsa15575	-	GH177	GH177(47-374)	GH109_e2	N	TAT	0.165342	0.000206	0.833778	0.000276	0.000184	CS pos: 33-34. Pr: 0.5260
WP_259092793.1	Fsa15665	-	GH172	GH172(247-474)	GH172_e3	N	SP	0.999279	0.00015	0.000155	0.000126	0.000125	CS pos: 19-20. Pr: 0.9784
WP_259092820.1	Fsa15695	-	GH179	GH179(20-219)	GH109_e7	N	None	0	0	0	0	0
WP_259092940.1	Fsa15805	3.2.1.8	GH10	GH10(63-384)	GH10_e77	N	TAT	0	0.333321	0.333339	0.333331	0	CS pos: 30-31. Pr: 0.3163
WP_259092987.1	Fsa15835	-	GH179	GH179(27-347)	GH109_e2	N	None	0	0	0	0	0
WP_259093023.1	Fsa15910	-	GH109	GH109(5-163)	GH109_e7	N	None	0	0	0	0	0
WP_259093049.1	Fsa15955	-	GH141	GH141(40-551)	GH141_e24	N	None	0.499396	0.000116	0.000131	9.9e-05	9.4e-05
WP_259093276.1	Fsa16245	-	GT30	GT30(71-237)	GT30_e35	N	None	0.00384	1e-06	1e-06	1e-06	1e-06
WP_259093601.1	Fsa16640	-	GT26	GT26(377-544)	GT26_e125	N	None	0	0	0	0	0
WP_259094039.1	Fsa17635	-	GH179	GH179(26-151)	GH109_e7	N	None	0	0	0	0	0
WP_259094377.1	Fsa07975Nga	-	GH123	GH123(563-1036)	GH123_e13	N	LIPO	0.166565	0.66669	1.7e-05	1.5e-05	1.6e-05	CS pos: 20-21. Pr: 0.6181
WP_259094390.1	Fsa07945	-	GH39	GH39(86-253)	GH39_e12	N	LIPO	0	1.00001	0	0	0	CS pos: 21-22. Pr: 0.9892
WP_259094422.1	Fsa07855	-	GT4	GT4(6-70)	GT4_e2219	N	None	0	0	0	0	0
WP_259094425.1	Fsa07850	-	GT9	GT9(144-387)	GT9_e283	N	None	0	0	0	0	0
WP_259094427.1	Fsa07845	-	GT9	GT9(141-383)	GT9_e283	N	None	0	0	0	0	0
WP_259094429.1	Fsa07840	-	GT4	GT4(221-369)	GT4_e1663	N	None	0	0	0	0	0
WP_259094432.1	Fsa07835	-	GT2	GT2(8-135)	GT2	N	None	0	0	0	0	0
WP_259094468.1	Fsa07740	-	GT4	GT4(589-752)	GT4_e3405	N	None	0	0	0	0	0
WP_259094478.1	Fsa07710	-	GT4	GT4(231-380)	GT4_e3520	N	None	0	0	0	0	0
WP_259094480.1	Fsa07700	2.4.1.-|3.5.1.-	CE4	CE4(77-301)	CE4_e298	N	None	0	0	0	0	0
WP_259094491.1	Fsa07675	-	GT2	GT2(8-158)	GT2	N	None	0	0	0	0	0
WP_259094507.1	Fsa07640	-	GT4	GT4(220-369)	GT4_e481	N	None	0	0	0	0	0
WP_259094547.1	Fsa07555	3.2.1.55	GH51_1	GH51_1(390-823)	GH51_e31	N	LIPO	0.49926	0.500181	0.000165	0.000107	0.000128	CS pos: 18-19. Pr: 0.2934
WP_259094745.1	Fsa06835	N	GH151	GH151(38-176)	N	GH0	None	0	0	0	0	0
WP_259094894.1	Fsa06225	-	GH3	GH3(66-292)	GH3_e62	N	None	0	0	0	0	0
WP_259094973.1	Fsa05885	-	GT4	GT4(198-348)	GT4_e3456	N	None	0	0	0	0	0
WP_259094974.1	Fsa05880	-	GT4	GT4(190-341)	GT4_e3523	N	None	0	0	0	0	0
WP_259094978.1	Fsa05865	-	GT4	GT4(194-353)	GT4_e3552	N	None	0	0	0	0	0
WP_259094984.1	Fsa05845	-	GT4	GT4(206-348)	GT4_e231	N	None	0	0	0	0	0
WP_259095005.1	Fsa05745	-	GH33	GH33(36-320)	GH33_e108	N	SP	0.665519	0.000301	0.000167	0.000183	0.000142	CS pos: 19-20. Pr: 0.4328
WP_259095006.1	Fsa05730	-	GT83	GT83(4-514)	GT83_e69	N	None	0	0.166657	0	0	0
WP_259095029.1	Fsa05655	-	GH39	GH39(599-743)	GH39_e85	N	SP	0.99922	0.000163	0.00017	0.000139	0.000137	CS pos: 25-26. Pr: 0.9789
WP_259095052.1	Fsa05585	-	GT2	GT2(5-114)	GT2	N	None	0	0	0	0	0
WP_259095101.1	Fsa05325	-	GH177	GH177(51-404)	GH109_e2	N	TAT	0	0	0.999265	0.000734	0	CS pos: 42-43. Pr: 0.7696
WP_259095124.1	Fsa05240	3.5.1.-|3.2.1.-	CE4	CE4(124-260)	CE4_e321	N	None	2.4e-05	0	0	0	0
WP_259095129.1	Fsa05225	-	GH179	GH179(38-169)	GH109_e7	N	None	0	0	0	0	0
WP_259095173.1	Fsa05100	-	GH179	GH179(39-258)	GH109_e7	N	None	0	0	0	0	0
WP_259095186.1	Fsa05075	-	AA4	AA4(4-240)	AA4_e1	N	None	0	0	0	0	0
WP_259095198.1	Fsa05035	3.2.1.-	GH20	GH20(65-321)	GH20_e47	N	TAT	0	0	0.99999	2e-06	0	CS pos: 28-29. Pr: 0.8959
WP_259095221.1	Fsa04970	-	GH137	GH137(33-259)	GH137_e1	N	None	0	0	0	0	0
WP_259095224.1	Fsa04955	-	GH109	GH109(2-149)	GH109_e5	N	None	0	0	0	0	0
WP_259095268.1	Fsa04850	-	CBM9	CBM9(452-637)	CBM9_e16	N	SP	0.999329	0.000128	0.000148	0.000119	0.000118	CS pos: 16-17. Pr: 0.9515
WP_259095270.1	Fsa04840	-	GT4	GT4(210-346)	GT4_e1358	N	None	0	0	0	0	0
WP_259095298.1	Fsa04770	3.2.1.146	GH5_13	GH5_13(56-313)	GH5_e159	N	TAT	0.00514	0.333325	0.661499	9e-06	4e-06	CS pos: 26-27. Pr: 0.3868
WP_259095337.1	Fsa04640	-	GT2	GT2(6-133)	GT2	N	None	0	0	0	0	0
WP_259095338.1	Fsa04635	-	GT4	GT4(186-329)	GT4_e2566	N	None	0	0	0	0	0
WP_259095339.1	Fsa04630	-	GT4	GT4(188-340)	GT4_e2799	N	None	0	0	0	0	0
WP_259095382.1	Fsa04490	-	CE14	CE14(9-117)	CE14_e44	N	None	0	0	0	0	0
WP_259095389.1	Fsa04480	-	GT28	GT28(190-352)	GT28_e62	N	None	0	0	0	0	0
WP_259095442.1	Fsa04260	3.2.1.23	GH42	GH42(45-300)	GH42_e34	N	TAT	0	0	0.999828	0.000167	0	CS pos: 21-22. Pr: 0.9089
WP_259095539.1	Fsa11785	-	GT2	GT2(5-139)	GT2	N	None	0	0	0	0	0
WP_259095590.1	Fsa11915	-	GT19	GT19(4-366)	GT19_e21	N	None	0	0	0	0	0
WP_259095723.1	Fsa12235	-	GH99	GH99(486-785)	GH99_e4	N	LIPO	0.099569	0.599583	3.5e-05	2.1e-05	1.8e-05	CS pos: 42-43. Pr: 0.4880
WP_259095761.1	Fsa12340	-	GH127	GH127(61-522)	GH127_e1	N	None	0	0	0	0	0
WP_259095815.1	Fsa12490	-	GT4	GT4(141-293)	GT4_e2796	N	None	0	0	0	0	0
WP_259096024.1	Fsa13045	-	GH51_1	GH51_1(3-186)	GH51_e48	N	None	0	0	0	0	0
WP_259096087.1	Fsa13185	-	GT9	GT9(81-319)	GT9_e318	N	None	0	0	0	0	0
WP_259096120.1	Fsa13260	-	GH39	GH39(347-631)	GH39_e138	N	SP	0.999222	0.00016	0.000177	0.000139	0.00014	CS pos: 16-17. Pr: 0.9725
WP_259096175.1	Fsa13390	-	GT9	GT9(107-348)	GT9_e106	N	None	0	0	0	0	0
WP_259096418.1	Fsa13900	-	GH140	GH140(126-496)	GH140_e15	N	LIPO	0.310537	0.689018	0.000128	9.2e-05	9.8e-05	CS pos: 13-14. Pr: 0.6851
WP_259096622.1	Fsa03915	-	GH177	GH177(51-413)	GH109_e7	N	TAT	0	0	0.833551	0.166436	0	CS pos: 39-40. Pr: 0.5613
WP_259096663.1	Fsa03795	-	GT2	GT2(9-193)	GT2	N	None	0	0	0	0	0
WP_259096668.1	Fsa03780	3.1.1.72|3.2.1.8	CE1	CE1(119-254)	CE1_e24	N	SP	0.665704	0.00029	0.000169	0.000128	0.00013	CS pos: 24-25. Pr: 0.3492
WP_259096672.1	Fsa03770	3.2.1.78|3.2.1.151|3.2.1.4|-	GH26+CBM32	GH26(34-357)+CBM32(489-609)	GH26_e7+CBM32_e231	N	LIPO	0.499465	0.500099	0.000129	9e-05	9e-05	CS pos: 20-21. Pr: 0.3042
WP_259096795.1	Fsa03445	-	GH177	GH177(35-330)	GH109_e2	N	TAT	0	0	0.999981	0	0	CS pos: 24-25. Pr: 0.9030
WP_259096830.1	Fsa03355	-	GT4	GT4(191-337)	GT4_e3521	N	None	0	0	0	0	0
WP_259096832.1	Fsa03350	-	GT4	GT4(210-354)	GT4_e459	N	None	0	0	0	0	0
WP_259096834.1	Fsa03345	-	GT4	GT4(190-334)	GT4_e3210	N	None	0	0	0	0	0
WP_259096836.1	Fsa03340	-	CE11	CE11(4-270)	CE11_e2	N	None	0	0	0	0	0
WP_259096923.1	Fsa03110	-	GH179	GH179(18-345)	GH109_e7	N	None	0	0	0	0	0
WP_259097057.1	Fsa02770	3.2.1.92	GH171	GH171(29-384)	GH171_e0	N	None	0	0	0	0	0
WP_259097099.1	Fsa02745	-	GH13	GH13(281-577)	GH13_e159	N	SP	0.999269	0.000149	0.000158	0.000128	0.000127	CS pos: 17-18. Pr: 0.9796
WP_259097174.1	Fsa02665	-	GH179	GH179(37-286)	GH109_e5	N	None	0	0	0	0	0
WP_259097442.1	Fsa02480	N	GH177	GH177(35-372)	N	GH0	TAT	0	0	0.999987	0	0	CS pos: 28-29. Pr: 0.9318
WP_259097778.1	Fsa02265	-	GT2	GT2(5-170)	GT2	N	None	0	0	0	0	0
WP_259097780.1	Fsa02260	-	GH177	GH177(33-392)	GH109_e2	N	TAT	0	0	0.999988	0	0	CS pos: 28-29. Pr: 0.9115
WP_259097785.1	Fsa02250	-	GH177	GH177(2-222)	GH109_e7	N	None	0	0	0	0	0
WP_259097919.1	Fsa02105	-	GH179	GH179(19-154)	GH109_e7	N	None	0	0	0	0	0
WP_259098096.1	Fsa03920	-	GH139	GH139(464-909)	GH139_e2	N	SP	0.999256	0.000151	0.000159	0.000124	0.000123	CS pos: 21-22. Pr: 0.9802
WP_259098627.1	Fsa10730	-	GT83	GT83(136-429)	GT83_e36	N	None	0	0	0	0	0
WP_259098850.1	Fsa10490	-	GT4	GT4(194-350)	GT4_e1114	N	None	0	0	0	0	0
WP_259098859.1	Fsa10480	-	CE4	CE4(79-221)	CE4_e274	N	None	0	0	0	0	0
WP_259098862.1	Fsa10470	-	GT4	GT4(254-402)	GT4_e2691	N	None	0	0	0	0	0
WP_259099076.1	Fsa10215	-	GH163	GH163(210-449)	GH163_e8	N	SP	0.83261	0.166853	0.000149	0.000133	0.000125	CS pos: 19-20. Pr: 0.7965
WP_259099108.1	Fsa10190	-	GH177	GH177(53-399)	GH109_e2	N	TAT	0	0	0.997034	0.002958	0	CS pos: 39-40. Pr: 0.8991
WP_259099310.1	Fsa09975	-	GH177	GH177(35-396)	GH109_e6	N	TAT	0	0	1.00001	0	0	CS pos: 30-31. Pr: 0.8664
WP_259100094.1	Fsa09185	-	GH177	GH177(34-360)	GH109_e2	N	TAT	0	0	1	3e-06	0	CS pos: 29-30. Pr: 0.8877
WP_259100457.1	Fsa00890	-	GT4	GT4(202-364)	GT4_e2996	N	None	0	0	0	0	0
WP_259100577.1	Fsa00715	-	GH32	GH32(4-286)	GH32_e60	N	None	0	0	0	0	0
WP_259100589.1	Fsa00705	-	GH177	GH177(6-301)	GH109_e7	N	None	0	0	0	0	0
WP_259100606.1	Fsa00680	-	GH177	GH177(3-156)	GH109_e7	N	None	0	0	0	0	0
WP_259100753.1	Fsa00465	-	GH179	GH179(22-257)	GH109_e7	N	None	0	0	0	0	0
WP_259100766.1	Fsa00425	-	CE19	CE19(30-330)	CE19_e1	N	None	0	0	0	0	0
WP_259100819.1	Fsa00345	-	GH179	GH179(28-256)	GH109_e7	N	None	0	0	0	0	0
WP_259100843.1	Fsa00270	-	GH109	GH109(3-157)	GH109_e7	N	None	0	0	0	0	0
WP_259100963.1	Fsa08610	-	PL17	PL17(424-543)	PL17_e5	N	SP	0.981	0.00021	0.000227	0.000184	0.000173	CS pos: 26-27. Pr: 0.9556
WP_259100965.1	Fsa08605	-	GH38	GH38(243-366)	GH38_e23	N	None	0.497504	0.000383	0.000188	0.000197	0.00015
WP_259101877.1	Fsa01760	-	GT2	GT2(7-122)	GT2	N	None	0	0	0	0	0
WP_259101879.1	Fsa01755	-	GH109	GH109(3-363)	GH109_e7	N	None	0	0	0	0	0
WP_259101930.1	Fsa01660	-	GT89	GT89(22-236)	GT89_e4	N	None	0	0	0	0	0
WP_259102030.1	Fsa01435	N	GH177	GH177(46-392)	N	GH0	TAT	0	0	0.905948	0.094045	0	CS pos: 40-41. Pr: 0.8341
WP_259102108.1	Fsa01045	-	GH179	GH179(19-238)	GH109_e7	N	None	0	0	0	0	0
WP_259102181.1	Fsa01325	N	GH177	GH177(40-395)	N	GH0	TAT	0	0	0.999992	0	0	CS pos: 35-36. Pr: 0.8424
WP_259102219.1	Fsa01245	-	GH23	GH23(215-321)	GH23_e864	N	SP	0.999277	0.000145	0.000159	0.000131	0.000129	CS pos: 23-24. Pr: 0.9758
WP_259102250.1	Fsa01295	N	GH55	GH55(41-445)	N	GH0	SP	0.999393	0.000119	0.000145	0.00011	0.00011	CS pos: 24-25. Pr: 0.9798
WP_259102255.1	Fsa01210	-	GH163	GH163(232-491)	GH163_e14	N	None	0	0.333317	0	0	0
WP_259102297.1	Fsa00140	-	N	CBM9(31-213)	GH123_e13+GH123_e13	N	SP	0.666155	0.333457	0.000111	7.9e-05	8.3e-05	CS pos: 17-18. Pr: 0.6499
WP_302898659.1	Fsa14040	-	GT4	GT4(216-360)	GT4_e459	N	None	0	0	0	0	0
WP_302898722.1	Fsa07440	2.4.1.129	GT51	GT51(470-623)	GT51_e144	N	None	0	0	0	0	0
WP_259096659.1	Fsa03805	-	GH123	N	GH123_e13	GH0	SP	0.999221	0.000163	0.000154	0.000126	0.000125	CS pos: 18-19. Pr: 0.9683
WP_259096392.1	Fsa13845	-	GH129	N	GH129_e2	GH0	SP	0.999149	0.000185	0.000178	0.000144	0.000144	CS pos: 18-19. Pr: 0.9751
WP_259098029.1	Fsa01985	-	GH36	N	GH36_e47	CBM51+GH36	None	0	0	0	0	0
WP_259099092.1	Fsa10210	-	GH39	N	GH39_e101	GH0	SP	0.999247	0.000144	0.000156	0.000126	0.000124	CS pos: 16-17. Pr: 0.9796
WP_259091889.1	Fsa14210	N	N	CE14(89-217)	N	N	None	0	0	0	0	0
WP_259093501.1	Fsa16445	N	N	GH177(7-328)	N	N	None	0	0	0	0	0
WP_259094159.1	Fsa17950	N	N	GH179(20-153)	N	N	None	0	0	0	0	0
WP_259094666.1	Fsa07080	N	N	GH179(27-274)	N	N	None	0	0	0	0	0
WP_259094830.1	Fsa06495	N	N	GH179(20-156)	N	N	None	0	0	0	0	0
WP_259094849.1	Fsa06420	N	N	GH5(700-920)	N	N	SP	0.99912	0.000179	0.00018	0.00014	0.000147	CS pos: 19-20. Pr: 0.9783
WP_259094881.1	Fsa06280	N	N	GH179(35-168)	N	N	None	0	0	0	0	0
WP_259095021.1	Fsa05675	N	N	GH179(28-158)	N	N	None	0	0	0	0	0
WP_259095031.1	Fsa05645	N	N	CBM9(678-862)	N	N	LIPO	0.333166	0.666689	3e-05	2.6e-05	2.5e-05	CS pos: 21-22. Pr: 0.6556
WP_259095034.1	Fsa05630	N	N	GH5_57(78-382)	N	N	TAT	0	0	1.00001	0	0	CS pos: 23-24. Pr: 0.9475
WP_259095252.1	Fsa04895	N	N	GH179(18-145)	N	N	None	0	0	0	0	0
WP_259095258.1	Fsa04880	N	N	GT83(111-477)	N	N	None	0	0	0	0	0
WP_259095521.1	Fsa11740	N	N	GH179(18-348)	N	N	None	0	0	0	0	0
WP_259096326.1	Fsa13705	N	N	CE4(14-134)	N	N	None	0	0	0	0	0
WP_259096782.1	Fsa03480	N	N	GH179(20-289)	N	N	None	0	0	0	0	0
WP_259096793.1	Fsa03450	N	N	GH5(366-679)	N	N	None	0.332718	0.000107	0.000144	0.000102	9.6e-05
WP_259096942.1	Fsa03050	N	N	GH177(6-134)	N	N	None	0	0	0	0	0
WP_259097055.1	Fsa02775	N	N	AA6(3-162)	N	N	None	0	0	0	0	0
WP_259097440.1	Fsa02485	N	N	GH177(39-196)	N	N	TAT	0	0	0.999997	0	0	CS pos: 29-30. Pr: 0.8826
WP_259097445.1	Fsa02475	N	N	GH177(34-373)	N	N	TAT	0	0	1	0	0	CS pos: 29-30. Pr: 0.9172
WP_259097448.1	Fsa02470	N	N	GH179(56-182)	N	N	TAT	0	0	0.999974	0	0	CS pos: 31-32. Pr: 0.8771
WP_259097452.1	Fsa02465	N	N	GH109(33-178)	N	N	TAT	0	0	1	0	0	CS pos: 28-29. Pr: 0.8411
WP_259099073.1	Fsa10220	N	N	GH177(81-325)	N	N	TAT	0	0	0.99999	0	0	CS pos: 29-30. Pr: 0.8990
WP_259099385.1	Fsa09925	N	N	GH179(24-258)	N	N	None	0	0	0	0	0
WP_259099869.1	Fsa09345	N	N	GH177(45-291)	N	N	None	0	0	0	0	0
WP_259101244.1	Fsa08135	N	N	GH179(23-206)	N	N	None	0	0	0	0	0
WP_259101246.1	Fsa08130	N	N	CE1(325-497)	N	N	SP	0.999306	0.000138	0.00015	0.000129	0.000126	CS pos: 19-20. Pr: 0.9824
WP_259101927.1	Fsa01665	N	N	GT83(22-368)	N	N	None	0	0	0	0	0
WP_259102106.1	Fsa01040Cel	N	N	GH5(50-399)	N	N	LIPO	0.365458	0.633999	0.000153	0.00011	0.000113	CS pos: 22-23. Pr: 0.3573
WP_302898687.1	Fsa02715	N	N	GH179(35-299)	N	N	None	0	0	0	0	0
WP_302898703.1	Fsa05360	N	N	GH5_57(78-382)	N	N	TAT	0	0	1.00001	0	0	CS pos: 25-26. Pr: 0.4704
WP_259096810.1	Fsa03410	3.2.1.151|3.2.1.150|-	N	N	GH74_e1+GH74_e1+GH74_e3+GH74_e0	N	LIPO	0.332916	0.333563	4.6e-05	4.8e-05	3.8e-05	CS pos: 19-20. Pr: 0.3252
WP_302898730.1	Fsa07790	-	N	N	GT2	N	None	0	0	0	0	0
WP_259093178.1	Fsa16120	-	N	N	GH38_e6	N	SP	0.665604	0.000243	0.000164	0.000152	0.00013	CS pos: 15-16. Pr: 0.6526
WP_259094488.1	Fsa07680	-	N	N	GT4_e2185	N	None	0	0	0	0	0
WP_259094869.1	Fsa06335	-	N	N	CBM50_e835	N	SP	0.999076	0.000201	0.000198	0.000158	0.000142	CS pos: 26-27. Pr: 0.9689
WP_259096245.1	Fsa13540	-	N	N	PL17_e3	N	SP	0.999279	0.000152	0.000154	0.000118	0.000119	CS pos: 29-30. Pr: 0.9811
WP_259096509.1	Fsa04215	4.2.2.6	N	N	PL22_e0	N	None	0	0	0	0	0
WP_259096868.1	Fsa03245	-	N	N	GT4_e2380	N	None	0	0	0	0	0
WP_259101131.1	Fsa08240	3.2.1.-	N	N	CBM50_e699	N	SP	0.999225	0.000157	0.000169	0.000135	0.000131	CS pos: 20-21. Pr: 0.9806
WP_018196012.1	Fsa06175	N	N	N	N	GH1	None	0	0	0	0	0
WP_020250147.1	Fsa04495	N	N	N	N	CE8	None	0	0	0	0	0
WP_259092461.1	Fsa15195	N	N	N	N	GH16_3	TAT	0	0	0.999002	0.001004	0	CS pos: 30-31. Pr: 0.9290
WP_259092985.1	Fsa15830	N	N	N	N	GT0	None	0	0	0	0	0
WP_259093551.1	Fsa16540	N	N	N	N	GH9	None	0.175119	1.2e-05	1.5e-05	1.7e-05	1.2e-05
WP_259093882.1	Fsa17240	N	N	N	N	GT4	None	0	0	0	0	0
WP_259093979.1	Fsa17490	N	N	N	N	GH28	None	0	0	0	0	0
WP_259094180.1	Fsa18000	N	N	N	N	GH13	None	0	0	0	0	0
WP_259094523.1	Fsa07605	N	N	N	N	GT4	None	0	0	0	0	0
WP_259094541.1	Fsa07570	N	N	N	N	GH13_11	None	0	0	0	0	0
WP_259095333.1	Fsa04655	N	N	N	N	GH1	None	0	0	0	0	0
WP_259095717.1	Fsa12220	N	N	N	N	CE20	TAT	0	0	0.833325	0.166671	0	CS pos: 49-50. Pr: 0.7479
WP_259095879.1	Fsa12680	N	N	N	N	GH28	None	0	0	0	0	0
WP_259095933.1	Fsa12815	N	N	N	N	CE8	None	0	0	0	0	0
WP_259095944.1	Fsa12845	N	N	N	N	GH105	None	0.474535	0.000431	0.000252	0.000262	0.000207
WP_259095996.1	Fsa12970	N	N	N	N	GT1	None	0	0	0	0	0
WP_259096012.1	Fsa13015	N	N	N	N	GT47	None	0	0	0	0	0
WP_259096499.1	Fsa13740	N	N	N	N	GT58	None	0	0	0	0	0
WP_259096866.1	Fsa03250	N	N	N	N	GT2	None	0	0	0	0	0
WP_259096878.1	Fsa03220	N	N	N	N	GH0	None	0	0	0	0	0
WP_259097024.1	Fsa02855	N	N	N	N	GH52	None	0	0	0	0	0
WP_259098254.1	Fsa10930	N	N	N	N	GH13	None	0	0	0	0	0
WP_259098654.1	Fsa10720	N	N	N	N	GH5_11	None	0	0	0	0	0
WP_259099237.1	Fsa10105	N	N	N	N	CE14	None	0	0	0	0	0
WP_259099665.1	Fsa09620	N	N	N	N	PL0	SP	0.999318	0.000132	0.000147	0.000117	0.000113	CS pos: 19-20. Pr: 0.9842
WP_259099810.1	Fsa09395	N	N	N	N	GH13_26	None	0	0	0	0	0
WP_259099886.1	Fsa09320	N	N	N	N	GH13	None	0	0	0	0	0
WP_259100495.1	Fsa00820	N	N	N	N	GH13	None	0	0	0	0	0
WP_259100499.1	Fsa00810	N	N	N	N	GT2	None	0	0	0	0	0
WP_259101055.1	Fsa08430	N	N	N	N	GH38	None	0	0	0	0	0
WP_259101274.1	Fsa08570	N	N	N	N	CBM50+GH25	None	0	0	0	0	0
WP_259101452.1	Fsa11180	N	N	N	N	GT4	None	0	0	0	0	0
WP_259102049.1	Fsa01380	N	N	N	N	GT83	None	0	0	0	0	0
WP_259102236.1	Fsa01195	N	N	N	N	GH16_3	TAT	0	0	0.999982	1e-06	0	CS pos: 31-32. Pr: 0.9188
WP_302898712.1	Fsa06590	N	N	N	N	GH13_30	None	0	0	0	0	0

## Sheet: Table S4. RNA-Seq
Table S4. RNA-Seq data from F. sacchari PD1T grown on eight different polysaccharides.
protein_id	product	go_function	go_process	dbCAN	Description	KEGG_ko	KEGG_Pathway	KEGG_Module	KEGG_Reaction	KEGG_rclass	BRITE	KEGG_TC	PFAMs	baseMean	log2FoldChange	lfcSE	stat	pvalue	padj	Beta-glucan	Chondroitin sulfate	Corn stover	Gellan gum	Locust bean gum	Starch	Xanthan gum	Xyloglucan
WP_259093776.1	Ig-like domain-containing protein													354991	-1.78241	0.260847	128.002	1.64317e-24	3.68437e-23	465876	118663	413475	410980	242345	476979	558127	135429
WP_259094301.1	S-layer homology domain-containing protein													274214	-0.61873	0.288664	35.7692	8.01357e-06	2.35386e-05	376369	335180	217560	258396	279530	337485	126975	245108
WP_259101765.1	hypothetical protein													76447.6	-1.46094	0.28896	219.649	7.83158e-44	7.44001e-42	94355.1	8126.64	54243.7	155390	40480.3	89513.1	115806	34275.3
WP_020250262.1	GspE/PulE family protein	ATP binding|0005524||IEA	protein secretion|0009306||IEA		Type II secretory pathway, ATPase PulE Tfp pilus assembly pathway, ATPase PilB	ko:K02652	-	-	-	-	ko00000,ko02035,ko02044	3.A.15.2	T2SSE,T2SSE_N	70473.7	-1.57342	0.280353	133.266	1.30483e-25	3.16136e-24	81092.6	26666.3	43386.6	122726	41149.1	73971.3	128746	27248.1
WP_259096083.1	type IV pilus twitching motility protein PilT	ATP binding|0005524||IEA	type IV pilus-dependent motility|0043107||IEA		Type II/IV secretion system protein	ko:K02669	-	-	-	-	ko00000,ko02035,ko02044	3.A.15.2	T2SSE	55826.6	-1.59024	0.283243	108.217	2.15097e-20	3.52954e-19	65016	23596.3	45860.3	100717	34336.3	57831.7	87177.1	21593
WP_259101767.1	hypothetical protein												DNA-binding transcription factor activity|0003700||IEA,sequence-specific DNA binding|0043565||IEA	47456.6	-1.29735	0.281095	226.89	2.27206e-45	2.64585e-43	55458.5	4613.9	39334.8	96985.5	28439.6	56842.6	66366.6	22564.8
WP_259101758.1	prepilin-type N-terminal cleavage/methylation domain-containing protein												structural constituent of ribosome|0003735||IEA	42034.4	-1.79169	0.355754	186.82	7.05575e-37	3.63875e-35	56246	3272	18963.5	91133.1	19640.2	55521.1	60098.7	16245.9
WP_259094022.1	hypothetical protein													38483.8	-0.608	0.261506	42.9812	3.36359e-07	1.25708e-06	44035.9	32726.6	23207.2	32635.2	29374	42349.6	66521.3	28892.1
WP_259093766.1	carboxypeptidase regulatory-like domain-containing protein													32688.2	-1.68203	0.232188	116.913	3.36348e-22	6.25886e-21	48321.4	15639.4	25428.2	38468.3	20799.6	45558.8	45848.2	15059.1
WP_259100567.1	hypothetical protein												endonuclease activity|0004519||IEA	32102.8	-2.80696	0.584976	95.5901	8.76145e-18	1.15434e-16	36477	2673.56	11977.6	75668.8	9858.28	37409.9	63421.9	5212.47
WP_259093882.1	ATP-dependent Clp protease ATP-binding subunit	ATP binding|0005524||IEA,ATP hydrolysis activity|0016887||IEA			Belongs to the ClpA ClpB family	ko:K03696	ko01100,map01100	-	-	-	ko00000,ko03110	-	AAA,AAA_2,ClpB_D2-small,Clp_N,UVR	31999.3	-0.0226788	0.138129	3.09486	0.87609	0.879746	32913.9	32959.7	30767.6	31374	29558.6	34252.1	30545	32399.7
WP_259095996.1	pyruvate%2C phosphate dikinase	pyruvate%2C phosphate dikinase activity|0050242||IEA	carbon utilization|0015976||IEA		Belongs to the PEP-utilizing enzyme family	ko:K01006	ko00620,ko00710,ko00720,ko01100,ko01120,ko01200,map00620,map00710,map00720,map01100,map01120,map01200	M00169,M00171,M00172,M00173	R00206	RC00002,RC00015	ko00000,ko00001,ko00002,ko01000	-	PEP-utilizers,PEP-utilizers_C,PPDK_N	31117.1	0.185456	0.261203	2.70929	0.910531	0.912047	28094.8	32056.9	34453.9	28564.9	33680.1	33658.6	28445.5	31948.6
WP_259096085.1	type II secretion system F family protein				protein transport across the cell outer membrane	ko:K02455,ko:K02653,ko:K12278	ko03070,ko05111,map03070,map05111	M00331	-	-	ko00000,ko00001,ko00002,ko02035,ko02044	3.A.15,3.A.15.2	T2SSF	28792.1	-1.3638	0.346628	141.321	2.68673e-27	7.46083e-26	34831.4	4797.18	12229.8	46943.4	13579.4	34160.7	59669.1	13534.1
WP_259101257.1	manganese catalase family protein				Manganese containing catalase	-	-	-	-	-	-	-	Mn_catalase	28020.2	0.552392	0.225908	40.7021	9.23488e-07	3.18718e-06	24098.1	35065.2	26034.6	37409.6	18492.4	25653.3	18230.6	35340.1
WP_259096816.1	Fe-S cluster assembly protein SufB	structural molecule activity|0005198||IEA	iron-sulfur cluster assembly|0016226||IEA		assembly protein SufB	ko:K09014	-	-	-	-	ko00000	-	UPF0051	26996.7	0.210201	0.185439	14.5084	0.0428441	0.0549635	22534.5	32665.2	30283.7	26750.7	21470.6	29247.5	26205.4	26069.8
WP_259101769.1	hypothetical protein													24305.2	-1.45358	0.262164	189.508	1.90706e-37	1.01242e-35	30696.2	4305.7	18300.6	44489.3	17228.7	26889.6	36963.3	11207.9
WP_018196012.1	DNA-directed RNA polymerase subunit beta'	DNA-directed 5'-3' RNA polymerase activity|0003899||IEA	DNA-templated transcription|0006351||IEA		DNA-directed 5'-3' RNA polymerase activity	ko:K03046	ko00230,ko00240,ko01100,ko03020,map00230,map00240,map01100,map03020	M00183	R00435,R00441,R00442,R00443	RC02795	br01611,ko00000,ko00001,ko00002,ko01000,ko03021,ko03400	-	RNA_pol_Rpb1_1,RNA_pol_Rpb1_2,RNA_pol_Rpb1_3,RNA_pol_Rpb1_4,RNA_pol_Rpb1_5	23537.8	0.680284	0.213906	35.3531	9.59867e-06	2.76671e-05	17157.4	33298.4	27802.6	22046.8	23536.4	21750.9	16637	27494.3
WP_259094900.1	DNA-directed RNA polymerase subunit beta	DNA binding|0003677||IEA,DNA-directed 5'-3' RNA polymerase activity|0003899||IEA,ribonucleoside binding|0032549||IEA	DNA-templated transcription|0006351||IEA		DNA-directed 5'-3' RNA polymerase activity	ko:K03043	ko00230,ko00240,ko01100,ko03020,map00230,map00240,map01100,map03020	M00183	R00435,R00441,R00442,R00443	RC02795	br01611,ko00000,ko00001,ko00002,ko01000,ko03021,ko03400	-	RNA_pol_Rpb2_1,RNA_pol_Rpb2_2,RNA_pol_Rpb2_3,RNA_pol_Rpb2_45,RNA_pol_Rpb2_6,RNA_pol_Rpb2_7	22245.7	0.874434	0.245625	35.4773	9.09551e-06	2.64158e-05	15923.8	32240.7	24110.7	17317.6	24101.9	20472.5	15845.9	29193.1
WP_259095499.1	elongation factor Tu	translation elongation factor activity|0003746||IEA	translational elongation|0006414||IEA		GTP-dependent binding of aminoacyl-tRNA to the A-site of ribosomes during protein biosynthesis	ko:K02358	-	-	-	-	ko00000,ko03012,ko03029,ko04147	-	GTP_EFTU,GTP_EFTU_D2,GTP_EFTU_D3	21886.6	0.480251	0.297741	19.6342	0.00641636	0.0101193	17987	27835.1	19458.9	13984.2	23318.2	28831.3	18254.7	25091.4
WP_259093227.1	M28 family peptidase				aminopeptidase activity	-	-	-	-	-	-	-	PA,Peptidase_M28	21093.8	-0.581655	0.206239	38.2125	2.76097e-06	8.72776e-06	22960.7	26761.7	27929.7	21631.8	15296.9	23892.1	15280.9	15342.6
WP_259091901.1	type IV pilus assembly protein PilM		pilus assembly|0009297||IEA		Type IV pilus assembly protein PilM;	ko:K04024	-	-	-	-	ko00000	-	FtsA,MreB_Mbl,PilM_2	20501.4	-0.360577	0.215192	155.642	2.64812e-30	8.69063e-29	16599	10954	11202.8	25479	15070.8	20805.6	46062.5	12928
WP_259100408.1	type I glutamate--ammonia ligase	glutamate-ammonia ligase activity|0004356||IEA	glutamine biosynthetic process|0006542||IEA		PFAM glutamine synthetase catalytic region	ko:K01915	ko00220,ko00250,ko00630,ko00910,ko01100,ko01120,ko01230,ko02020,ko04217,ko04724,ko04727,map00220,map00250,map00630,map00910,map01100,map01120,map01230,map02020,map04217,map04724,map04727	-	R00253	RC00010,RC02798	ko00000,ko00001,ko01000,ko04147	-	Gln-synt_C,Gln-synt_N	20303.6	-3.96647	0.975257	75.5028	1.13359e-13	1.01797e-12	37341.4	1341.28	1765.8	75374.4	2158.08	28730	1101.7	2388.69
WP_259095132.1	2-oxoacid:acceptor oxidoreductase subunit alpha				PFAM Pyruvate flavodoxin ferredoxin oxidoreductase	ko:K00174	ko00010,ko00020,ko00620,ko00650,ko00720,ko01100,ko01120,ko01130,ko01200,map00010,map00020,map00620,map00650,map00720,map01100,map01120,map01130,map01200	M00009,M00011,M00173,M00620	R01196,R01197	RC00004,RC02742,RC02833	br01601,ko00000,ko00001,ko00002,ko01000	-	PFOR_II,POR,POR_N	20150.2	-0.0787339	0.165369	10.3916	0.167445	0.190626	19434.1	24174.9	17943.3	20745.1	17702.8	21341	19907.8	18401.4
WP_259100514.1	zf-HC2 domain-containing protein													20106.8	-0.910238	0.419242	38.2722	2.6896e-06	8.52454e-06	32343.1	11336.7	9755.08	29389.2	13971.3	30661.4	10692.3	17209.8
WP_259100060.1	stalk domain-containing protein													19758.5	-0.443545	0.282988	106.854	4.12329e-20	6.5573e-19	14497.7	8114.19	17005.8	28557	17585.5	16220.5	43784.9	10660.3
WP_259092517.1	tetratricopeptide repeat protein													19378.5	-2.9165	0.33478	123.146	1.69311e-23	3.51272e-22	37492.5	6765.02	14920.8	15454	12304.6	36189.5	23091.8	4965.94
WP_259098904.1	hypothetical protein													18865.1	0.310252	0.242368	16.8654	0.0182853	0.0257248	14489.9	17932.2	19275.9	18223	17677.6	27465.4	17632	17965.7
WP_259101760.1	type II secretion system protein													18599.4	-1.56911	0.302492	208.72	1.6303e-41	1.25221e-39	24854.8	1797.52	10832.4	36852.2	10675.6	23660.1	26515.6	8376.64
WP_259093451.1	Fe-Mn family superoxide dismutase				Destroys radicals which are normally produced within the cells and which are toxic to biological systems	ko:K04564	ko04013,ko04068,ko04146,ko04211,ko04212,ko04213,ko05016,map04013,map04068,map04146,map04211,map04212,map04213,map05016	-	-	-	ko00000,ko00001,ko01000	-	LysM,Sod_Fe_C,Sod_Fe_N	17745.1	0.0134757	0.179166	30.1087	9.06979e-05	0.000214701	18785.6	20732.4	13105.2	12582.9	17081.7	21372.9	17571.1	18961.5
WP_259094218.1	serine protein kinase				protein kinase activity	ko:K07180	-	-	-	-	ko00000	-	AAA_PrkA,PrkA	17294.6	-1.24723	0.268321	124.362	9.44387e-24	1.99371e-22	18909.4	8331.46	11512.1	25460.2	8272.23	17070.2	35900.2	7965.72
WP_259092475.1	thiamine pyrophosphate-dependent enzyme	catalytic activity|0003824||IEA,thiamine pyrophosphate binding|0030976||IEA			oxidoreductase activity, acting on the aldehyde or oxo group of donors, iron-sulfur protein as acceptor	ko:K00170	ko00010,ko00020,ko00620,ko00633,ko00640,ko00650,ko00680,ko00720,ko01100,ko01120,ko01130,ko01200,map00010,map00020,map00620,map00633,map00640,map00650,map00680,map00720,map01100,map01120,map01130,map01200	M00173,M00307,M00374,M00620	R01196,R01199,R08034	RC00004,RC00250,RC02742,RC02833	br01601,ko00000,ko00001,ko00002,ko01000	-	TPP_enzyme_C	16632.5	-0.447127	0.238916	42.643	3.90905e-07	1.43703e-06	18748.1	10517.3	13123.9	25352	11367.6	19271.3	18004	13751.6
WP_259095131.1	2-oxoacid:ferredoxin oxidoreductase subunit beta				oxidoreductase beta subunit	ko:K00175	ko00010,ko00020,ko00620,ko00650,ko00720,ko01100,ko01120,ko01130,ko01200,map00010,map00020,map00620,map00650,map00720,map01100,map01120,map01130,map01200	M00009,M00011,M00173,M00620	R01196,R01197	RC00004,RC02742,RC02833	br01601,ko00000,ko00001,ko00002,ko01000	-	PFO_beta_C,TPP_enzyme_C	16002.4	-0.103666	0.177695	13.7123	0.0565424	0.070927	15671.7	20185.5	15026.8	16705.4	14608	16820.3	13626.4	14584.7
WP_259094865.1	Tad domain-containing protein													15819.2	-1.84096	0.396319	168.655	4.8229e-33	1.87212e-31	22802.8	870.987	5912.91	32506.8	7677.48	21521.3	22880	6365.16
WP_259102284.1	sulfide-dependent adenosine diphosphate thiazole synthase	catalytic activity|0003824||IEA	thiamine biosynthetic process|0009228||IEA		Involved in the biosynthesis of the thiazole moiety of thiamine. Catalyzes the conversion of NAD and glycine to adenosine diphosphate 5-(2-hydroxyethyl)-4-methylthiazole-2-carboxylate (ADT), an adenylated thiazole intermediate, using free sulfide as a source of sulfur	ko:K03146	ko00730,ko01100,map00730,map01100	-	R10685	RC00033,RC03253,RC03254	ko00000,ko00001	-	Thi4	15421.8	0.106887	0.190934	27.9465	0.000224859	0.00049346	14528.8	16867.1	10704.4	14978.9	13354.9	21499.4	13533.9	15645.8
WP_259093771.1	M6 family metalloprotease domain-containing protein		proteolysis|0006508||IEA											15296.4	-1.09896	0.291678	27.854	0.000233698	0.000511303	18503	11043.3	16933.3	14069.7	14220.9	21157.5	17992.5	8638.01
WP_259093768.1	hypothetical protein												nucleic acid binding|0003676||IEA,endonuclease activity|0004519||IEA	14845.6	-1.19169	0.321267	26.1656	0.000470478	0.000963372	18326.9	11805.7	14076.7	11741.2	14880.3	20560.6	19105	8023.3
WP_259101756.1	prepilin-type N-terminal cleavage/methylation domain-containing protein				general secretion pathway protein	ko:K02456,ko:K02679	ko03070,ko05111,map03070,map05111	M00331	-	-	ko00000,ko00001,ko00002,ko02044	3.A.15	N_methyl,SBP_bac_10	14770.5	-1.69736	0.343285	48.4492	2.9085e-08	1.3237e-07	19217.6	21907.1	16177.3	19204.2	6137.05	13124.8	14061.1	5925.83
WP_259098822.1	FecR family protein													14624.8	-1.33613	0.27953	293.007	1.88273e-59	6.17877e-57	16076.8	1325.78	5083.56	25755.4	8577.91	15600.7	33014	6367.89
WP_259099720.1	prepilin-type N-terminal cleavage/methylation domain-containing protein				cell adhesion	ko:K02650	ko02020,map02020	-	-	-	ko00000,ko00001,ko02035,ko02044	3.A.15.2	N_methyl,SBP_bac_10	14345.4	-1.64413	0.315681	148.48	8.46682e-29	2.59027e-27	18204.8	2763.16	8851.03	28917.5	7376.37	18971.8	19699.7	5824.58
WP_259093557.1	prepilin-type N-terminal cleavage/methylation domain-containing protein				general secretion pathway protein	ko:K02456,ko:K02679	ko03070,ko05111,map03070,map05111	M00331	-	-	ko00000,ko00001,ko00002,ko02044	3.A.15	N_methyl,SBP_bac_10	14275.3	-0.244849	0.21452	64.3728	2.01e-11	1.42556e-10	13018.4	24002.4	19083.8	9609.61	11931.1	15882.8	10509.5	10986.1
WP_259094095.1	phytanoyl-CoA dioxygenase family protein				dioxygenase activity	-	-	-	-	-	-	-	PhyH	14170.1	-0.397958	0.146802	31.193	5.72797e-05	0.00014163	15192.9	18699.6	12531.3	12596.5	12832.3	14932.4	14053.9	11529.6
WP_259098486.1	glutamate synthase-related protein	glutamate synthase activity|0015930||IEA,oxidoreductase activity%2C acting on the CH-NH2 group of donors|0016638||IEA	glutamate biosynthetic process|0006537||IEA		Glutamate synthase central domain	ko:K00265	ko00250,ko00910,ko01100,ko01110,ko01120,ko01130,ko01230,map00250,map00910,map01100,map01110,map01120,map01130,map01230	-	R00093,R00114,R00248	RC00006,RC00010,RC02799	ko00000,ko00001,ko01000	-	GATase_2,GXGXG,Glu_syn_central,Glu_synthase	14080.9	0.112025	0.189982	35.888	7.61065e-06	2.24098e-05	13605.7	20751.4	13352.1	10922.5	13475.1	14752.3	10640	14703.4
WP_259095126.1	PEP-CTERM sorting domain-containing protein													13971	-0.130374	0.168095	157.018	1.36024e-30	4.54671e-29	16151.6	4419.34	13563.7	14624.6	14013.8	18794.3	15323.1	14756
WP_259099759.1	RNA polymerase sigma factor RpoD/SigA				Sigma factors are initiation factors that promote the attachment of RNA polymerase to specific initiation sites and are then released	ko:K03086	-	-	-	-	ko00000,ko03021	-	Sigma70_r1_1,Sigma70_r1_2,Sigma70_r2,Sigma70_r3,Sigma70_r4	13948.6	-0.919946	0.306623	40.5429	9.90734e-07	3.38048e-06	16031.8	10092.4	8189.44	21601.1	9084.27	17754.3	16821	8473.12
WP_259096043.1	hypothetical protein													13922.1	-0.379378	0.151835	17.6808	0.0134963	0.0195906	16142.9	16289.6	14948.8	13822.3	11661.4	13000.6	12689.6	12410.2
WP_259100524.1	hypothetical protein													13539.9	-1.30206	0.435257	36.6725	5.41039e-06	1.6317e-05	23195.2	7652.42	6892.37	23637.5	6476.62	14520.6	11967.3	9406.8
WP_259091898.1	PilN domain-containing protein												ATPase-coupled transmembrane transporter activity|0042626||IEA,ABC-type transporter activity|0140359||IEA	13461.1	-0.862127	0.186914	179.013	3.14766e-35	1.49514e-33	14435.3	7207.26	7748.1	18557.5	9422.17	12700.2	26425.9	7941.61
WP_259094106.1	molybdopterin-dependent oxidoreductase	oxidoreductase activity|0016491||IEA											hydrolase activity%2C acting on glycosyl bonds|0016798||IEA	13090.1	0.494327	0.191356	31.3048	5.46201e-05	0.000135704	10160.2	16083.7	14183.5	9056.5	12346.5	12978.2	15716.5	14312.3
WP_259101507.1	prepilin-type N-terminal cleavage/methylation domain-containing protein				Required for transformation and DNA binding	ko:K02245,ko:K02456	ko03070,ko05111,map03070,map05111	M00331,M00429	-	-	ko00000,ko00001,ko00002,ko02044	3.A.15	N_methyl	12755.5	-0.611883	0.2574	60.855	1.01867e-10	6.67404e-10	12903.6	22682.4	16125	10721.9	8268.18	14797.1	7729.85	8443.3
WP_259091892.1	hypothetical protein													12712.7	-0.839375	0.281114	47.7929	3.90836e-08	1.74403e-07	14714.8	9049.57	9005.01	20345	6979.2	13485.4	16751.9	8224.01
WP_018196243.1	hypothetical protein												phosphatidylglycerophosphatase activity|0008962||IEA	12052.6	0.189554	0.229082	33.2673	2.36069e-05	6.31735e-05	12101	15512.7	8628.26	9699.33	11477	15774.9	8094.33	13800.2
WP_259100372.1	DUF1559 domain-containing protein				general secretion pathway protein	ko:K02456,ko:K02679	ko03070,ko05111,map03070,map05111	M00331	-	-	ko00000,ko00001,ko00002,ko02044	3.A.15	N_methyl,SBP_bac_10	12015	-0.736764	0.226366	64.8223	1.63269e-11	1.16483e-10	11892.8	20148	15814.1	10273.5	6957.6	11991.4	11486.2	7136.55
WP_259098806.1	carboxypeptidase-like regulatory domain-containing protein												tRNA (guanine-N7-)-methyltransferase activity|0008176||IEA	11886.3	-1.44645	0.337097	274.542	1.63793e-55	3.94195e-53	12676.3	522.952	3269.84	23701.4	5422.5	13923.2	25896.1	4651.32
WP_018195409.1	ATP-binding protein				protein histidine kinase activity	ko:K07636	ko02020,map02020	M00434	-	-	ko00000,ko00001,ko00002,ko01000,ko01001,ko02022	-	CBS,GAF,GAF_2,HAMP,HATPase_c,HisKA,PAS,PAS_3,PAS_4,PAS_8,PAS_9,dCache_1	11836.7	-0.955207	0.266187	96.6158	5.38516e-18	7.22692e-17	12635.9	6047	5818.27	17314.4	7686.73	14302	20982.6	6517.12
WP_259091891.1	secretin N-terminal domain-containing protein													11575.3	-0.268809	0.170974	44.9938	1.37139e-07	5.47647e-07	10233.8	11901.9	10885.9	12411.2	9210.69	11355.8	17091.1	8494.35
WP_259094016.1	SpoIVB peptidase S55 domain-containing protein													11016.7	-0.23383	0.160256	14.4351	0.0439625	0.0562582	12014.5	11889.5	10228.2	12275.4	8970.39	12049.6	9544.5	10216.5
WP_259101762.1	prepilin-type N-terminal cleavage/methylation domain-containing protein												FMN adenylyltransferase activity|0003919||IEA	10780	-1.36399	0.314451	194.949	1.34655e-38	7.8404e-37	12856.8	1105.61	5843.72	21514.4	5605.02	13430.4	17518.4	4995.06
WP_259095333.1	acetate--CoA ligase	acetate-CoA ligase activity|0003987||IEA	acetyl-CoA biosynthetic process from acetate|0019427||IEA		Catalyzes the conversion of acetate into acetyl-CoA (AcCoA), an essential intermediate at the junction of anabolic and catabolic pathways. AcsA undergoes a two-step reaction. In the first half reaction, AcsA combines acetate with ATP to form acetyl-adenylate (AcAMP) intermediate. In the second half reaction, it can then transfer the acetyl group from AcAMP to the sulfhydryl group of CoA, forming …	ko:K01895	ko00010,ko00620,ko00640,ko00680,ko00720,ko01100,ko01110,ko01120,ko01130,ko01200,map00010,map00620,map00640,map00680,map00720,map01100,map01110,map01120,map01130,map01200	M00357	R00235,R00236,R00316,R00926,R01354	RC00004,RC00012,RC00043,RC00070,RC02746,RC02816	ko00000,ko00001,ko00002,ko01000,ko01004	-	ACAS_N,AMP-binding,AMP-binding_C	10741.7	0.131416	0.20412	119.031	1.2191e-22	2.34093e-21	8172.82	23081.2	11783.8	7638.53	9965.73	9819.17	6609.03	8951.71
WP_259102111.1	phytanoyl-CoA dioxygenase family protein				dioxygenase activity	-	-	-	-	-	-	-	PhyH	10738.1	0.191734	0.312502	14.5642	0.0420094	0.0540079	8787.82	12983.3	14631.1	7631.17	12637.1	12476.2	8652.18	10036.6
WP_259094102.1	hypothetical protein				-	-	-	-	-	-	-	-	-	10555.8	0.0415157	0.146701	58.723	2.71386e-10	1.6577e-09	9598.3	14408.3	9431.54	7577.17	8366.62	11342.1	12738.7	9878.92
WP_259095588.1	adenosylcobalamin-dependent ribonucleoside-diphosphate reductase	ribonucleoside-diphosphate reductase activity%2C thioredoxin disulfide as acceptor|0004748||IEA			Catalyzes the reduction of ribonucleotides to deoxyribonucleotides. May function to provide a pool of deoxyribonucleotide precursors for DNA repair during oxygen limitation and or for immediate growth after restoration of oxygen	ko:K00525	ko00230,ko00240,ko01100,map00230,map00240,map01100	M00053	R02017,R02018,R02019,R02024	RC00613	ko00000,ko00001,ko00002,ko01000,ko03400	-	Ribonuc_red_lgC,Ribonuc_red_lgN	10107.5	1.81745	0.578758	37.6446	3.53991e-06	1.09598e-05	4954.69	5514.86	18410.5	4281.3	20669.5	11809.7	4044.48	17463
WP_259093773.1	hypothetical protein													9933.95	-0.707973	0.266623	26.2275	0.000458635	0.000943941	10551.9	7406.98	9702.71	9471.45	8740.08	13329.6	13334.4	6459.39
WP_259094104.1	cytochrome c3 family protein	electron transfer activity|0009055||IEA,heme binding|0020037||IEA											carbon-nitrogen ligase activity%2C with glutamine as amido-N-donor|0016884||IEA	9659.06	-0.0306005	0.17281	19.6074	0.00648302	0.0101933	9029.34	11751.8	11863	7876.18	9071.79	10549.9	8828.82	8840.53
WP_259093955.1	radical SAM protein	catalytic activity|0003824||IEA,iron-sulfur cluster binding|0051536||IEA			PFAM Radical SAM domain protein	ko:K04069	-	-	R04710	-	ko00000,ko01000	-	Fer4_12,Radical_SAM	9166.02	-0.120659	0.163356	11.8529	0.1055	0.125009	8773.03	9071.21	11315	8721.41	8175.75	10365.5	9223.6	8068.89
WP_259092436.1	DUF1559 domain-containing protein				Required for transformation and DNA binding	ko:K02245,ko:K02456	ko03070,ko05111,map03070,map05111	M00331,M00429	-	-	ko00000,ko00001,ko00002,ko02044	3.A.15	N_methyl	9157.99	-0.833678	0.399344	71.2564	8.23086e-13	6.75304e-12	21700.9	4724.24	8450.41	5876.92	11500.6	2847.36	6532.21	12176.3
WP_259097660.1	response regulator transcription factor	DNA binding|0003677||IEA	phosphorelay signal transduction system|0000160||IEA,regulation of DNA-templated transcription|0006355||IEA		response regulator receiver	ko:K07658,ko:K07668	ko02020,map02020	M00434,M00459	-	-	ko00000,ko00001,ko00002,ko02022	-	Response_reg,Trans_reg_C	9013.8	-0.842251	0.250407	98.4891	2.21227e-18	3.03661e-17	11246	3046.94	6905.24	12628.5	6348.89	13764.2	10306.8	6272.6
WP_259095229.1	Hsp20/alpha crystallin family protein				Belongs to the small heat shock protein (HSP20) family	ko:K13993	ko04141,map04141	-	-	-	ko00000,ko00001,ko03110	-	HSP20	9012.09	-0.858228	0.516522	28.4081	0.000185422	0.000415581	10438.8	7561.62	3341.91	15653	5611.81	15522.6	5185.06	5758.38
WP_018195503.1	xanthine dehydrogenase family protein molybdopterin-binding subunit	molybdopterin cofactor binding|0043546||IEA			Aldehyde oxidase and xanthine dehydrogenase, a/b hammerhead domain	-	-	-	-	-	-	-	Ald_Xan_dh_C,Ald_Xan_dh_C2	9007.37	0.51551	0.247803	42.2097	4.73827e-07	1.72431e-06	6744.64	14635.7	8107.76	5218.07	9747.42	8737.3	9173.93	9640.93
WP_302898691.1	quinolinate synthase NadA	quinolinate synthetase A activity|0008987||IEA,4 iron%2C 4 sulfur cluster binding|0051539||IEA	NAD biosynthetic process|0009435||IEA		Catalyzes the condensation of iminoaspartate with dihydroxyacetone phosphate to form quinolinate	ko:K03517	ko00760,ko01100,map00760,map01100	M00115	R04292	RC01119	ko00000,ko00001,ko00002,ko01000	-	NadA	8948.56	0.0367957	0.216125	13.1938	0.0675244	0.0833094	8364.36	7705.73	8933.84	11182.8	8934.7	10562.9	7314.49	8580.1
WP_259099718.1	DUF4058 family protein				Protein of unknown function (DUF4058)	-	-	-	-	-	-	-	DUF4058	8772.79	-0.660554	0.214308	246.622	1.45006e-49	2.09389e-47	8837.62	1771.16	5904.75	14952.7	5801.85	9846.72	15530.2	5590.9
WP_259094539.1	hypothetical protein												methyltransferase activity|0008168||IEA,S-adenosylmethionine-dependent methyltransferase activity|0008757||IEA	8767.38	0.473445	0.197464	31.3475	5.36371e-05	0.000133446	8743.21	10076.7	8120.47	6939.49	7467.23	9467.3	6536.89	12138.7
WP_259095545.1	acyl-ACP--UDP-N-acetylglucosamine O-acyltransferase	acyl-[acyl-carrier-protein]-UDP-N-acetylglucosamine O-acyltransferase activity|0008780||IEA	lipid biosynthetic process|0008610||IEA		Involved in the biosynthesis of lipid A, a phosphorylated glycolipid that anchors the lipopolysaccharide to the outer membrane of the cell	ko:K00677	ko00540,ko01100,ko01503,map00540,map01100,map01503	M00060	R04567	RC00039,RC00055	ko00000,ko00001,ko00002,ko01000,ko01005	-	Acetyltransf_11,Hexapep,Hexapep_2	8759.02	0.257587	0.257259	53.0589	3.60913e-09	1.88825e-08	9546.66	11579.5	5492.2	6519.99	9810.72	10724.7	4246.62	11413.3
WP_259092278.1	glycoside hydrolase family 38 C-terminal domain-containing protein	alpha-mannosidase activity|0004559||IEA	mannose metabolic process|0006013||IEA	GH38	Alpha-mannosidase	ko:K01191,ko:K16869	ko00511,map00511	-	-	-	ko00000,ko00001,ko01000,ko04131	-	Alpha-mann_mid,Glyco_hydro_38,Glyco_hydro_38C	8607.18	0.675232	0.375446	11.6575	0.112398	0.132428	6123.49	9136.89	9612.74	5489.07	11934.3	9254.3	8972.61	9778.21
WP_259095179.1	sugar phosphate isomerase/epimerase	isomerase activity|0016853||IEA			PFAM AP endonuclease family 2 C terminus	-	-	-	-	-	-	-	AP_endonuc_2,AP_endonuc_2_N	8603.08	0.748379	0.421125	14.8239	0.0383243	0.0496415	5473.58	11401.7	9557.18	4899.13	10302.6	7965.51	10914.7	9194.85
WP_302898647.1	adenylate/guanylate cyclase domain-containing protein	cyclase activity|0009975||IEA,phosphorus-oxygen lyase activity|0016849||IEA,purine ribonucleotide binding|0032555||IEA,metal ion binding|0046872||IEA			Adenylyl- / guanylyl cyclase, catalytic domain	ko:K01768	ko00230,ko02025,ko04113,ko04213,map00230,map02025,map04113,map04213	M00695	R00089,R00434	RC00295	ko00000,ko00001,ko00002,ko01000	-	CHASE2,Guanylate_cyc	8550.48	-1.21509	0.345905	223.192	1.38607e-44	1.51628e-42	8901.02	514.704	2669.55	16965.5	4065.84	11178.4	16819.5	3834.13
WP_259093153.1	thiol peroxidase	thioredoxin peroxidase activity|0008379||IEA,oxidoreductase activity%2C acting on peroxide as acceptor|0016684||IEA			Redoxin	ko:K11065	-	-	-	-	ko00000,ko01000	-	AhpC-TSA,Redoxin	8463.69	0.191585	0.318551	14.827	0.0382814	0.0496037	8932.27	6746.1	7401.69	6535.11	9196.46	12006	6581.28	10200.9
WP_259098909.1	polysaccharide biosynthesis tyrosine autokinase		extracellular polysaccharide biosynthetic process|0045226||IEA		Cellulose biosynthesis protein BcsQ	-	-	-	-	-	-	-	AAA_31	8456.79	-0.772948	0.223535	256.949	9.18852e-52	1.57955e-49	8227.31	1803.47	4175.1	14608.2	5761.46	9305.13	16633.3	4814.69
WP_259094178.1	hypothetical protein												DNA binding|0003677||IEA,DNA-binding transcription factor activity|0003700||IEA,sigma factor activity|0016987||IEA	8372.56	-0.159876	0.170257	13.8162	0.0545495	0.0686385	8874.7	9108.4	6292.08	8037.59	7251.14	9149.6	9256.25	7943.44
WP_259094658.1	S8 family serine peptidase	serine-type peptidase activity|0008236||IEA	proteolysis|0006508||IEA		Subtilase family	-	-	-	-	-	-	-	Peptidase_S8	8281.85	-0.181671	0.186812	34.5807	1.34072e-05	3.76969e-05	6843.11	11155.4	8442.04	8255.47	6850.86	8121.43	10129.9	6033
WP_259096814.1	Fe-S cluster assembly ATPase SufC	ATP binding|0005524||IEA	iron-sulfur cluster assembly|0016226||IEA		ATPases associated with a variety of cellular activities	ko:K09013	-	-	-	-	ko00000,ko02000	-	ABC_tran	8105.93	0.32723	0.226554	26.3866	0.000429503	0.000887524	7238.02	11483	6721.25	6008.04	6090.75	8143.89	8947.88	9081.31
WP_259096097.1	bifunctional aldolase/short-chain dehydrogenase				Enoyl-(Acyl carrier protein) reductase	ko:K00216	ko01053,ko01110,ko01130,map01053,map01110,map01130	-	R01505	RC00534	ko00000,ko00001,ko01000	-	adh_short_C2	8067.96	-0.210471	0.144523	33.6717	1.98399e-05	5.38106e-05	8255.92	10097.7	5741.25	7556.65	7172.09	8375.47	9135.74	7134.73
WP_259095817.1	hypothetical protein													7732.07	-0.241408	0.181214	31.9201	4.2025e-05	0.000107216	6560.74	7424.56	7269.09	9137.36	6926.96	8484.17	10081.4	5549.63
WP_259101664.1	GAF domain-containing protein	protein binding|0005515||IEA			Histidine kinase	ko:K10125	ko02020,map02020	M00504	-	-	ko00000,ko00001,ko00002,ko01000,ko01001,ko02022	-	HATPase_c,HisKA,dCache_1	7680.39	-0.0506156	0.167582	57.2603	5.30606e-10	3.10452e-09	7355.29	5702.58	7012.98	11880.8	5548.68	7517.69	8391.04	7100.97
WP_259091894.1	hypothetical protein													7578.21	-0.48914	0.219835	89.5147	1.55634e-16	1.80077e-15	6926.71	5151.89	5142.29	9172.29	5259.86	7940.97	14512.1	4934.78
WP_259094866.1	hypothetical protein													7575.68	-1.86562	0.562453	50.1829	1.32984e-08	6.40096e-08	8467.33	2557.93	4615.57	18339.8	2399.67	8630.54	10559	2323.53
WP_259094967.1	DUF1559 domain-containing protein				general secretion pathway protein	ko:K02456,ko:K02679	ko03070,ko05111,map03070,map05111	M00331	-	-	ko00000,ko00001,ko00002,ko02044	3.A.15	N_methyl,SBP_bac_10	7538.2	-0.049021	0.272878	51.9226	6.0473e-09	3.04474e-08	5535.58	13442.9	8513.17	8394.68	3533.99	7174.89	7350.31	5350.35
WP_259095068.1	sulfurtransferase	sulfurtransferase activity|0016783||IEA			Rhodanese Homology Domain	ko:K01011	ko00270,ko00920,ko01100,ko01120,ko04122,map00270,map00920,map01100,map01120,map04122	-	R01931,R03105,R03106	RC00214	ko00000,ko00001,ko01000	-	Rhodanese	7500.6	0.976049	0.696674	25.0195	0.000752783	0.00145869	6133.43	10972.7	4748.46	1680.77	12239.1	9798.78	3028.98	12064.6
WP_259096451.1	DUF1559 domain-containing protein				Required for transformation and DNA binding	ko:K02245,ko:K02456	ko03070,ko05111,map03070,map05111	M00331,M00429	-	-	ko00000,ko00001,ko00002,ko02044	3.A.15	N_methyl	7416.58	-1.95723	0.573931	151.17	2.30527e-29	7.17417e-28	2424.23	993.248	10982	3366.76	627.907	26638.2	12601.6	624.267
WP_259094180.1	polyribonucleotide nucleotidyltransferase	RNA binding|0003723||IEA,polyribonucleotide nucleotidyltransferase activity|0004654||IEA	RNA processing|0006396||IEA,mRNA catabolic process|0006402||IEA		Involved in mRNA degradation. Catalyzes the phosphorolysis of single-stranded polyribonucleotides processively in the 3'- to 5'-direction	ko:K00962	ko00230,ko00240,ko03018,map00230,map00240,map03018	M00394	R00437,R00438,R00439,R00440	RC02795	ko00000,ko00001,ko00002,ko01000,ko03016,ko03019	-	KH_1,PNPase,RNase_PH,RNase_PH_C,S1	7382.7	0.449644	0.168153	18.6494	0.00935942	0.0141415	6373.83	8904.46	6924.73	6109.88	7458.11	7500.55	6958.71	8703.83
WP_259093946.1	bifunctional (p)ppGpp synthetase/guanosine-3'%2C5'-bis(diphosphate) 3'-pyrophosphohydrolase	ATP binding|0005524||IEA,GTP binding|0005525||IEA,metal ion binding|0046872||IEA	guanosine tetraphosphate biosynthetic process|0015970||IEA		In eubacteria ppGpp (guanosine 3'-diphosphate 5-' diphosphate) is a mediator of the stringent response that coordinates a variety of cellular activities in response to changes in nutritional abundance	ko:K00951	ko00230,map00230	-	R00429	RC00002,RC00078	ko00000,ko00001,ko01000	-	ACT_4,HD_4,RelA_SpoT,TGS	7333.22	0.145116	0.138694	51.7996	6.39443e-09	3.2061e-08	7365.41	6029.79	5053.16	9601.98	5955.08	7523.95	7773.18	8143.8
WP_259099287.1	ABC transporter ATP-binding protein	ATP binding|0005524||IEA,ATPase-coupled transmembrane transporter activity|0042626||IEA			(ABC) transporter	ko:K06147,ko:K11085	ko02010,map02010	-	-	-	ko00000,ko00001,ko01000,ko02000	3.A.1.106,3.A.1.109,3.A.1.21	ABC_membrane,ABC_tran	7291.13	1.49899	0.334169	89.4569	1.59944e-16	1.83885e-15	4518.43	9173	7908.54	6334.25	8314.25	8475.67	1379.54	12772.2
WP_259096954.1	type I glyceraldehyde-3-phosphate dehydrogenase		gluconeogenesis|0006094||IEA,glycolytic process|0006096||IEA,glyceraldehyde-3-phosphate metabolic process|0019682||IEA		Belongs to the glyceraldehyde-3-phosphate dehydrogenase family	ko:K00134	ko00010,ko00710,ko01100,ko01110,ko01120,ko01130,ko01200,ko01230,ko04066,ko05010,map00010,map00710,map01100,map01110,map01120,map01130,map01200,map01230,map04066,map05010	M00001,M00002,M00003,M00165,M00166,M00308,M00552	R01061	RC00149	ko00000,ko00001,ko00002,ko01000,ko04131,ko04147	-	Gp_dh_C,Gp_dh_N	7246.59	0.536898	0.324071	26.1764	0.000468388	0.000960183	5660.34	10523.9	6442.18	4321.97	8953.55	9050.47	5109.34	8211.86
WP_259092354.1	argininosuccinate synthase	argininosuccinate synthase activity|0004055||IEA,ATP binding|0005524||IEA	arginine biosynthetic process|0006526||IEA		Belongs to the argininosuccinate synthase family. Type 1 subfamily	ko:K01940	ko00220,ko00250,ko01100,ko01110,ko01130,ko01230,ko05418,map00220,map00250,map01100,map01110,map01130,map01230,map05418	M00029,M00844,M00845	R01954	RC00380,RC00629	ko00000,ko00001,ko00002,ko01000,ko04147	-	Arginosuc_synth	7093.91	0.258831	0.211199	39.6754	1.45229e-06	4.83649e-06	5421.77	8067.39	5406.71	6374.2	6404.73	6431.01	11366.4	6486.9
WP_259096487.1	translation initiation factor IF-3	translation initiation factor activity|0003743||IEA	translational initiation|0006413||IEA		IF-3 binds to the 30S ribosomal subunit and shifts the equilibrum between 70S ribosomes and their 50S and 30S subunits in favor of the free subunits, thus enhancing the availability of 30S subunits on which protein synthesis initiation begins	ko:K02520	-	-	-	-	ko00000,ko03012,ko03029	-	IF3_C,IF3_N	7032.75	0.0147265	0.202969	7.41325	0.387155	0.411189	6689.14	7295.02	8918.43	7595.37	6649.34	6695.67	6162.13	6757.65
WP_259091791.1	citrate synthase				Belongs to the citrate synthase family	ko:K01647	ko00020,ko00630,ko01100,ko01110,ko01120,ko01130,ko01200,ko01210,ko01230,map00020,map00630,map01100,map01110,map01120,map01130,map01200,map01210,map01230	M00009,M00010,M00012,M00740	R00351	RC00004,RC00067	br01601,ko00000,ko00001,ko00002,ko01000	-	Citrate_synt	6926.1	0.466796	0.179414	35.9443	7.42677e-06	2.18908e-05	6193.12	8578.51	5778.55	6103.37	6644.05	8149.35	4926.68	8558.6
WP_259101157.1	ATPase domain-containing protein												ATP binding|0005524||IEA,ATP-dependent protein folding chaperone|0140662||IEA	6895.98	0.00462695	0.256977	102.327	3.56493e-19	5.18928e-18	6582.26	13571.9	6259.92	3961.21	7375.45	8231.53	2529.79	6603.61
WP_018196427.1	response regulator		phosphorelay signal transduction system|0000160||IEA		PFAM response regulator receiver	ko:K02483,ko:K07658,ko:K07668	ko02020,map02020	M00434,M00459	-	-	ko00000,ko00001,ko00002,ko02022	-	Response_reg,Trans_reg_C	6831.05	-0.144295	0.141182	30.3678	8.12855e-05	0.000194332	6649.9	8225.92	5752.14	6876	5151.93	7121.81	7935.76	6015.58
WP_259095553.1	GTP cyclohydrolase I FolE2												structural molecule activity|0005198||IEA	6812.64	0.0681956	0.148308	35.352	9.60301e-06	2.76671e-05	6317.83	9025.06	8094.61	5435.9	5864.27	7081.26	6169.28	6624.09
WP_259102257.1	DUF1559 domain-containing protein				general secretion pathway protein	ko:K02456,ko:K02679	ko03070,ko05111,map03070,map05111	M00331	-	-	ko00000,ko00001,ko00002,ko02044	3.A.15	N_methyl,SBP_bac_10	6793.69	-0.541845	0.36457	39.851	1.34421e-06	4.49316e-06	6340.72	13405.9	6115.72	7033.53	3176.75	8092.83	4397.13	4355.3
WP_259094024.1	CHASE2 domain-containing protein				Histidine kinase	-	-	-	-	-	-	-	GAF,GAF_2,HATPase_c,HisKA,MEDS,PAS_4,PAS_9,Response_reg	6774.11	-0.211107	0.183845	38.5734	2.35697e-06	7.52978e-06	6242.6	8982.39	9101.9	5490.4	5955.04	5655.31	7875.66	5392.48
WP_026307455.1	iron-sulfur cluster assembly accessory protein				protein maturation	ko:K13628	-	-	-	-	ko00000,ko03016	-	Fe-S_biosyn	6704.42	0.0347165	0.209491	62.1948	5.49492e-11	3.68711e-10	6520.15	4634.19	3858.99	6556.4	4797.95	8506.24	10499.2	6678.24
WP_259096822.1	Fe-S cluster assembly protein SufD	structural molecule activity|0005198||IEA	iron-sulfur cluster assembly|0016226||IEA		Uncharacterized protein family (UPF0051)	ko:K09015	-	-	-	-	ko00000	-	UPF0051	6626.76	0.18447	0.144813	16.7148	0.0193304	0.0269848	5790.61	7604.72	6895.42	6282.46	5271	7008.22	7218.21	6581.07
WP_259097004.1	2-oxoacid:acceptor oxidoreductase subunit alpha				pyruvate flavodoxin ferredoxin oxidoreductase domain protein	ko:K00174	ko00010,ko00020,ko00620,ko00650,ko00720,ko01100,ko01120,ko01130,ko01200,map00010,map00020,map00620,map00650,map00720,map01100,map01120,map01130,map01200	M00009,M00011,M00173,M00620	R01196,R01197	RC00004,RC02742,RC02833	br01601,ko00000,ko00001,ko00002,ko01000	-	PFOR_II,POR,POR_N	6623.7	-0.337621	0.156433	16.4055	0.0216594	0.0298437	6742	6394.56	6945.64	7850.31	5699.77	7087.53	6734.49	5334.67
WP_259097039.1	xanthine dehydrogenase family protein molybdopterin-binding subunit	molybdopterin cofactor binding|0043546||IEA			Aldehyde oxidase and xanthine dehydrogenase, a/b hammerhead domain	ko:K11177	ko00230,ko01100,ko01120,map00230,map01100,map01120	M00546	R01768,R02103	RC00143	ko00000,ko00001,ko00002,ko01000	-	Ald_Xan_dh_C,Ald_Xan_dh_C2	6494.14	0.503815	0.236723	13.6591	0.0575883	0.0720353	5232.89	7631.19	6207.28	4948.7	6821.73	7500.9	6204.79	7419.2
WP_259094112.1	NrfD/PsrC family molybdoenzyme membrane anchor subunit				Polysulphide reductase, NrfD	-	-	-	-	-	-	-	-	6487.76	0.305633	0.226176	26.46	0.000416693	0.00086204	5272.52	9092.9	8292.02	4763.32	6138.23	6766.06	5545.07	6516.87
WP_259096634.1	hypothetical protein												L-threonylcarbamoyladenylate synthase|0061710||IEA	6477.19	-0.93587	0.271873	44.5575	1.66647e-07	6.5462e-07	7239.92	6906.93	5668.69	10694.6	4167.05	7534.73	4781.5	3784.61
WP_259100495.1	chaperonin GroEL	protein binding|0005515||IEA,ATP hydrolysis activity|0016887||IEA	protein folding|0006457||IEA		Prevents misfolding and promotes the refolding and proper assembly of unfolded polypeptides generated under stress conditions	ko:K04077	ko03018,ko04212,ko04940,ko05134,ko05152,map03018,map04212,map04940,map05134,map05152	-	-	-	ko00000,ko00001,ko03019,ko03029,ko03110,ko04147	-	Cpn60_TCP1	6431.19	1.25307	0.238391	141.922	2.01095e-27	5.76152e-26	3672.11	14557.4	4158.27	3734.93	6858.89	5555.91	3545.38	8751.55
WP_259094081.1	cytochrome c oxidase subunit I				Belongs to the heme-copper respiratory oxidase family	ko:K02274	ko00190,ko01100,map00190,map01100	M00155	R00081	RC00016	ko00000,ko00001,ko00002,ko01000	3.D.4.2,3.D.4.3,3.D.4.4,3.D.4.6	COX1	6400.12	0.325029	0.261896	25.3949	0.00064566	0.00127523	5317.81	8419.95	8563.85	4299.26	6976.63	7144.79	4730.71	6661.36
WP_259092519.1	tetratricopeptide repeat protein													6385.82	-2.09545	0.282898	115.019	8.32917e-22	1.52631e-20	11104.2	2437.68	5080.07	5031.52	4649.77	8809.69	10361.4	2598.29
WP_020249726.1	DUF444 family protein				Belongs to the UPF0229 family	ko:K09786	-	-	-	-	ko00000	-	DUF444	6360.55	-0.591642	0.1863	167.799	7.30828e-33	2.77715e-31	6421.13	3197.18	4969.41	9037.69	3659.98	5844.93	12129.4	4260.78
WP_259101754.1	hypothetical protein												FMN binding|0010181||IEA	6345.4	-0.612651	0.206527	68.8052	2.57517e-12	2.00785e-11	6329.84	10663.9	8338.78	6136.15	4114.97	4977.74	5983.32	4139.53
WP_259095771.1	transcription termination factor Rho	RNA binding|0003723||IEA,ATP binding|0005524||IEA,ATP-dependent activity%2C acting on RNA|0008186||IEA	DNA-templated transcription termination|0006353||IEA		Facilitates transcription termination by a mechanism that involves Rho binding to the nascent RNA, activation of Rho's RNA-dependent ATPase activity, and release of the mRNA from the DNA template	ko:K03628	ko03018,map03018	-	-	-	ko00000,ko00001,ko03019,ko03021	-	ATP-synt_ab,Rho_N,Rho_RNA_bind	6305.78	-0.586248	0.258631	23.8901	0.00119113	0.00220286	7264.15	5444.75	3800.62	7624.88	5159.04	7415.8	7681.53	4838.17
WP_020250317.1	sugar phosphate isomerase/epimerase family protein	catalytic activity|0003824||IEA			isomerase activity	ko:K01805	ko00040,ko00051,ko01100,map00040,map00051,map01100	-	R00878,R01432	RC00376,RC00516	ko00000,ko00001,ko01000	-	AP_endonuc_2	6292.66	0.934026	0.270974	59.7111	1.72393e-10	1.0861e-09	4519.87	9032.35	5638.7	2601.73	7917.27	7190.47	5129.55	8634.91
WP_259101412.1	prepilin-type N-terminal cleavage/methylation domain-containing protein				general secretion pathway protein	ko:K02456,ko:K02679	ko03070,ko05111,map03070,map05111	M00331	-	-	ko00000,ko00001,ko00002,ko02044	3.A.15	N_methyl,SBP_bac_10	6284.73	-0.56634	0.296752	40.4194	1.04623e-06	3.53641e-06	6820.18	11638.8	5913.32	5085.54	3501.7	6698.97	4961.91	4605.98
WP_259096075.1	TlpA disulfide reductase family protein	oxidoreductase activity|0016491||IEA			alkyl hydroperoxide reductase Thiol specific antioxidant Mal allergen	-	-	-	-	-	-	-	AhpC-TSA,Redoxin,Thioredoxin_8	6256.11	-0.26656	0.299546	20.4247	0.00472187	0.007668	6486.35	5466.58	4679.48	7672.61	3749.48	9069.28	6171.87	5392.13
WP_259098019.1	hypothetical protein												translation factor activity%2C RNA binding|0008135||IEA	6232.77	-0.121762	0.131455	30.8895	6.51606e-05	0.000159262	6609.85	6633.04	4614.87	6594.81	4848.71	6238.51	7246.91	6074.77
WP_018195683.1	DUF1559 domain-containing protein				general secretion pathway protein	ko:K02456,ko:K02650,ko:K02679	ko02020,ko03070,ko05111,map02020,map03070,map05111	M00331	-	-	ko00000,ko00001,ko00002,ko02035,ko02044	3.A.15,3.A.15.2	N_methyl,SBP_bac_10	6230.8	-3.12819	0.261269	618.172	2.96954e-129	5.36003e-126	9222.19	15741.9	12355.3	579.608	878.354	1052.04	9219.59	1054.77
WP_259094110.1	4Fe-4S dicluster domain-containing protein	oxidoreductase activity|0016491||IEA,metal ion binding|0046872||IEA,4 iron%2C 4 sulfur cluster binding|0051539||IEA			4Fe-4S dicluster domain	ko:K00184	-	-	-	-	ko00000	5.A.3	Fer4_7	6121	0.252434	0.249243	26.9925	0.000334324	0.000705383	4932.14	8153.85	8603.12	3990.01	6301.38	6591.09	5408.8	5875.07
WP_259091818.1	tagatose 1%2C6-diphosphate aldolase				tagatose-bisphosphate aldolase activity	ko:K01635,ko:K01671	ko00052,ko01100,ko02024,map00052,map01100,map02024	-	R01069,R10760	RC00438,RC00439	ko00000,ko00001,ko01000	-	DeoC	6063.82	-0.097108	0.209799	11.7538	0.10895	0.128701	5970.06	6388.43	4510.55	6331.04	5142.5	7354.47	6407.29	5581.33
WP_028263283.1	Gfo/Idh/MocA family oxidoreductase	oxidoreductase activity|0016491||IEA,oxidoreductase activity%2C acting on NAD(P)H|0016651||IEA			inositol 2-dehydrogenase activity	-	-	-	-	-	-	-	GFO_IDH_MocA,GFO_IDH_MocA_C	6026.29	0.648759	0.420277	12.6452	0.0812405	0.0985478	3926.79	7653.81	8455.13	3861.17	7256.31	5295.35	6825.06	6156.34
WP_259097930.1	CARDB domain-containing protein													5984.64	-0.342618	0.313418	56.9822	6.02656e-10	3.48094e-09	6541.24	1870.07	6414.82	4765.11	7651.47	9580.5	6594.53	5158.37
WP_259102135.1	tubulin-like doman-containing protein													5960.01	0.0318512	0.221315	19.6155	0.00646293	0.0101705	5204.71	5363	4697.22	5496.08	6055.57	6757.32	8396.47	5320.65
WP_018195094.1	2-oxoacid:ferredoxin oxidoreductase subunit beta				PFAM thiamine pyrophosphate protein domain protein TPP-binding	ko:K00175	ko00010,ko00020,ko00620,ko00650,ko00720,ko01100,ko01120,ko01130,ko01200,map00010,map00020,map00620,map00650,map00720,map01100,map01120,map01130,map01200	M00009,M00011,M00173,M00620	R01196,R01197	RC00004,RC02742,RC02833	br01601,ko00000,ko00001,ko00002,ko01000	-	PFO_beta_C,TPP_enzyme_C	5769.73	-0.156772	0.168548	8.30406	0.306548	0.331527	5710.15	6451.8	6782.58	5465.34	5142.19	5787.3	5824.99	5121.9
WP_259101743.1	isochorismatase family cysteine hydrolase	hydrolase activity|0016787||IEA			Isochorismatase family	ko:K09020	ko00240,ko01100,map00240,map01100	-	R09947,R09980	RC02737,RC02738	ko00000,ko00001,ko01000	-	Isochorismatase	5731.78	0.377351	0.203092	38.107	2.89151e-06	9.09264e-06	4171.49	7614.85	6212.46	4440.99	4654.45	5404.88	7737.99	5418.22
WP_259091941.1	amino acid-binding ACT				aspartate kinase activity	-	-	-	-	-	-	-	-	5725.88	0.208027	0.277876	27.0375	0.000328136	0.000694764	4785.67	8843.86	4565.06	3721.1	5091.92	7072.24	5601.17	5527.77
WP_259094138.1	chlorite dismutase family protein				PFAM Chlorite dismutase	-	-	-	-	-	-	-	Chlor_dismutase	5607.42	-0.122637	0.161531	37.8013	3.30542e-06	1.03045e-05	5001.73	6548.69	5593.38	4842.53	4631.99	5553.78	7763.01	4594.41
WP_259095173.1	Gfo/Idh/MocA family oxidoreductase	oxidoreductase activity|0016491||IEA,oxidoreductase activity%2C acting on NAD(P)H|0016651||IEA		GH179	PFAM oxidoreductase domain protein	-	-	-	-	-	-	-	GFO_IDH_MocA,GFO_IDH_MocA_C	5580.8	0.532218	0.396899	18.6486	0.00936236	0.0141415	3545.15	8490.16	6947.26	3420.21	6750.08	4707.75	6504.43	5126.61
WP_259102123.1	serine/threonine-protein kinase	protein serine/threonine kinase activity|0004674||IEA,ATP binding|0005524||IEA,zinc ion binding|0008270||IEA	protein phosphorylation|0006468||IEA		Protein tyrosine kinase	-	-	-	-	-	-	-	PD40,Pkinase	5579.77	-0.410725	0.204364	63.3289	3.25596e-11	2.25173e-10	5294.37	3162.39	5768.43	8169.19	4690.8	6221.46	7115.92	3982.17
WP_259098113.1	phosphomethylpyrimidine synthase ThiC	iron-sulfur cluster binding|0051536||IEA	thiamine biosynthetic process|0009228||IEA		Catalyzes the synthesis of the hydroxymethylpyrimidine phosphate (HMP-P) moiety of thiamine from aminoimidazole ribotide (AIR) in a radical S-adenosyl-L-methionine (SAM)-dependent reaction	ko:K03147	ko00730,ko01100,map00730,map01100	M00127	R03472	RC03251,RC03252	ko00000,ko00001,ko00002,ko01000	-	ThiC_Rad_SAM	5519.57	0.439512	0.184274	13.5613	0.0595582	0.0741653	4374.17	5860.66	4606.34	5361.33	5304.4	5922.55	6419.87	5931.12
WP_259102263.1	GAF domain-containing protein	protein binding|0005515||IEA			phosphorelay sensor kinase activity	ko:K10942	ko02020,ko05111,map02020,map05111	M00515	-	-	ko00000,ko00001,ko00002,ko01000,ko01001,ko02022	-	HATPase_c,HisKA,PAS,PAS_8	5474.72	-0.0370899	0.149351	14.4053	0.0444255	0.0567904	5627.89	4718.04	5123.5	5856.32	4983.4	6612.2	5110.99	5484.55
WP_259093969.1	TIM barrel protein				Xylose isomerase-like TIM barrel	ko:K01805	ko00040,ko00051,ko01100,map00040,map00051,map01100	-	R00878,R01432	RC00376,RC00516	ko00000,ko00001,ko01000	-	AP_endonuc_2	5465.72	0.131331	0.219182	18.8558	0.00865114	0.013183	4675.12	6843.86	5194.64	4597.11	6323.06	6755.25	4411.9	5120.22
WP_259099715.1	DUF4058 family protein				Protein of unknown function (DUF4058)	-	-	-	-	-	-	-	DUF4058	5389.76	-0.264134	0.255025	172.942	6.01519e-34	2.43987e-32	4725.79	1087.87	3711.97	8682.77	4052.56	5232.38	10684.8	3934.93
WP_259093377.1	UPF0182 family protein				PFAM Uncharacterised protein family (UPF0182)	ko:K09118	-	-	-	-	ko00000	-	UPF0182	5378.66	-0.201626	0.184229	30.1201	9.02607e-05	0.000213947	6243.87	4002.94	4575.85	6719.66	4251.16	6334.59	4828.36	5429.43
WP_259100125.1	endopeptidase La	serine-type endopeptidase activity|0004252||IEA,ATP binding|0005524||IEA,ATP hydrolysis activity|0016887||IEA	proteolysis|0006508||IEA		ATP-dependent serine protease that mediates the selective degradation of mutant and abnormal proteins as well as certain short-lived regulatory proteins. Required for cellular homeostasis and for survival from DNA damage and developmental changes induced by stress. Degrades polypeptides processively to yield small peptide fragments that are 5 to 10 amino acids long. Binds to DNA in a double-stran…	ko:K01338	ko04112,map04112	-	-	-	ko00000,ko00001,ko01000,ko01002	-	AAA,LON_substr_bdg,Lon_C	5372.61	0.141351	0.274164	7.05748	0.42292	0.445633	4390.54	4970.56	6565.33	5787.91	6257.04	5998.63	4860.91	4842.37
WP_259093961.1	phytanoyl-CoA dioxygenase family protein				dioxygenase activity	-	-	-	-	-	-	-	PhyH	5318.04	0.364252	0.304174	15.774	0.0272628	0.0365597	4300.77	6184.19	5280.52	3179.37	6501.28	6155.91	5788.37	5535.85
WP_259094338.1	hypothetical protein												DNA binding|0003677||IEA,DNA-directed DNA polymerase activity|0003887||IEA	5302.99	-1.55031	0.391022	163.035	7.36649e-32	2.71357e-30	6442.74	512.83	1309.59	10070.6	2205.09	6234.49	11085	2199.76
WP_259093735.1	biosynthetic-type acetolactate synthase large subunit	acetolactate synthase activity|0003984||IEA	isoleucine biosynthetic process|0009097||IEA,valine biosynthetic process|0009099||IEA		TIGRFAM acetolactate synthase, large subunit, biosynthetic type	ko:K01652	ko00290,ko00650,ko00660,ko00770,ko01100,ko01110,ko01130,ko01210,ko01230,map00290,map00650,map00660,map00770,map01100,map01110,map01130,map01210,map01230	M00019,M00570	R00006,R00014,R00226,R03050,R04672,R04673,R08648	RC00027,RC00106,RC01192,RC02744,RC02893	ko00000,ko00001,ko00002,ko01000	-	TPP_enzyme_C,TPP_enzyme_M,TPP_enzyme_N	5285.21	0.362565	0.224991	72.7818	4.04174e-13	3.47397e-12	4205.01	10105.4	5394.99	3483.68	5250.29	4982.03	3479.27	5405.98
WP_259094660.1	type I DNA topoisomerase	DNA binding|0003677||IEA,DNA topoisomerase type I (single strand cut%2C ATP-independent) activity|0003917||IEA	DNA replication|0006260||IEA,DNA topological change|0006265||IEA		Releases the supercoiling and torsional tension of DNA, which is introduced during the DNA replication and transcription, by transiently cleaving and rejoining one strand of the DNA duplex. Introduces a single-strand break via transesterification at a target site in duplex DNA. The scissile phosphodiester is attacked by the catalytic tyrosine of the enzyme, resulting in the formation of a DNA-(5'…	ko:K03168	-	-	-	-	ko00000,ko01000,ko03032,ko03400	-	Topoisom_bac,Toprim,zf-C4_Topoisom	5245.01	0.294726	0.167689	16.8462	0.0184156	0.0258879	4825.74	5298.02	4704.84	4588.98	5433.99	6492.04	4580.92	5918.5
WP_018195366.1	NADH-quinone oxidoreductase subunit B				NDH-1 shuttles electrons from NADH, via FMN and iron- sulfur (Fe-S) centers, to quinones in the respiratory chain. The immediate electron acceptor for the enzyme in this species is believed to be ubiquinone. Couples the redox reaction to proton translocation (for every two electrons transferred, four hydrogen ions are translocated across the cytoplasmic membrane), and thus conserves the redox ene…	ko:K00331	ko00190,ko01100,map00190,map01100	M00144	R11945	RC00061	ko00000,ko00001,ko00002,ko01000	3.D.1	Oxidored_q6	5232.79	-0.173675	0.139962	17.0034	0.0173741	0.0245963	5368.04	4947.54	5035.66	5400.64	4182.9	5538.54	6214.26	4759.1
WP_259097944.1	tetratricopeptide repeat protein													5198.6	-0.0298408	0.290387	78.4487	2.85262e-14	2.70288e-13	4235.09	1644.97	4284.04	6107.27	5098.53	5948.13	9784.24	4148.28
WP_259099810.1	leucine--tRNA ligase	leucine-tRNA ligase activity|0004823||IEA	leucyl-tRNA aminoacylation|0006429||IEA		Belongs to the class-I aminoacyl-tRNA synthetase family	ko:K01869	ko00970,map00970	M00359,M00360	R03657	RC00055,RC00523	ko00000,ko00001,ko00002,ko01000,ko01007,ko03016,ko03029	-	Anticodon_1,tRNA-synt_1,tRNA-synt_1_2	5151.94	0.0945905	0.192379	5.36353	0.615691	0.631434	4844.87	4720.75	4645.93	5043.19	5705.75	5955.59	5142.56	5172.84
WP_259092203.1	nicotinate-nucleotide adenylyltransferase	nucleotidyltransferase activity|0016779||IEA	NAD biosynthetic process|0009435||IEA		Catalyzes the reversible adenylation of nicotinate mononucleotide (NaMN) to nicotinic acid adenine dinucleotide (NaAD)	ko:K00969	ko00760,ko01100,map00760,map01100	M00115	R00137,R03005	RC00002	ko00000,ko00001,ko00002,ko01000	-	CTP_transf_like	5102.74	-0.220363	0.17002	29.071	0.000140438	0.000320671	5252.56	4253.07	4579.34	5464.48	3998.58	5282.5	6940.51	4508.32
WP_259102233.1	hypothetical protein				BNR repeat-like domain	-	-	-	-	-	-	-	-	5102.19	-0.536078	0.267789	20.5605	0.00447812	0.00732488	4965.61	5448.7	4566.29	6982.86	3683.32	5090.54	6003.86	3424.73
WP_259099010.1	preprotein translocase subunit SecA	metal ion binding|0046872||IEA			protein targeting	ko:K03070	ko02024,ko03060,ko03070,map02024,map03060,map03070	M00335	-	-	ko00000,ko00001,ko00002,ko02044	3.A.5.1,3.A.5.10,3.A.5.2,3.A.5.4	Helicase_C,SEC-C,SecA_DEAD,SecA_PP_bind,SecA_SW	5094.82	-0.0617709	0.169692	4.47971	0.72316	0.732905	5047.38	5352.98	4988.8	4592.43	5026.8	5743.65	5113.29	4835.22
WP_259092798.1	zinc metalloprotease HtpX	metalloendopeptidase activity|0004222||IEA	proteolysis|0006508||IEA		Belongs to the peptidase M48B family	ko:K03799	-	M00743	-	-	ko00000,ko00002,ko01000,ko01002	-	Peptidase_M48	5015.13	-0.930267	0.384086	23.8972	0.00118775	0.00219772	6950.07	4102.94	3367.06	7456.62	2959.84	6670.83	3732.09	3647.18
WP_259097951.1	secretin N-terminal domain-containing protein													5014.36	0.375679	0.213308	259.289	2.91661e-52	5.26447e-50	2994.95	5336.93	18342.8	3431.13	3848.51	4111.88	2216.59	3886.28
WP_259092890.1	2-isopropylmalate synthase	2-isopropylmalate synthase activity|0003852||IEA	leucine biosynthetic process|0009098||IEA,carboxylic acid metabolic process|0019752||IEA		Belongs to the alpha-IPM synthase homocitrate synthase family	ko:K01649	ko00290,ko00620,ko01100,ko01110,ko01210,ko01230,map00290,map00620,map01100,map01110,map01210,map01230	M00432	R01213	RC00004,RC00470,RC02754	br01601,ko00000,ko00001,ko00002,ko01000	-	HMGL-like,LeuA_dimer	5004.59	-0.653364	0.328223	23.3836	0.00146115	0.00265999	6944.58	5097.72	2719.03	5736.52	3256.11	6601.18	3921.48	4415.43
WP_018196601.1	type II secretion system protein				Required for transformation and DNA binding	ko:K02245,ko:K02456	ko03070,ko05111,map03070,map05111	M00331,M00429	-	-	ko00000,ko00001,ko00002,ko02044	3.A.15	N_methyl	4959.87	-0.726571	0.254453	29.6834	0.000108534	0.000252942	5134.2	6364.5	4577.69	5267.61	2996.34	5366.5	6087.33	3102.91
WP_259099712.1	4-hydroxythreonine-4-phosphate dehydrogenase PdxA	4-hydroxythreonine-4-phosphate dehydrogenase activity|0050570||IEA	pyridoxine biosynthetic process|0008615||IEA		Pyridoxal phosphate biosynthetic protein PdxA	ko:K00097,ko:K22024	ko00750,ko01100,map00750,map01100	M00124	R05681,R05837,R07406	RC00089,RC00675,RC01475	ko00000,ko00001,ko00002,ko01000	-	DUF1357_C,DUF1537,PdxA	4951.85	0.185955	0.358636	82.2338	4.82155e-15	4.93082e-14	3851.56	859.795	4483.99	7054.77	4156.45	5350.19	9055.63	4381.34
WP_259101586.1	3-deoxy-7-phosphoheptulonate synthase	3-deoxy-7-phosphoheptulonate synthase activity|0003849||IEA	chorismate biosynthetic process|0009423||IEA		3-deoxy-7-phosphoheptulonate synthase activity	ko:K03856	ko00400,ko01100,ko01110,ko01130,ko01230,map00400,map01100,map01110,map01130,map01230	M00022	R01826	RC00435	ko00000,ko00001,ko00002,ko01000	-	DAHP_synth_1	4840.78	-0.936571	0.41454	25.9936	0.000504988	0.00102589	8935.34	5125.09	3851.83	3681.3	3473.06	5819.3	2386.18	4668.63
WP_259098148.1	glutamate-5-semialdehyde dehydrogenase	glutamate-5-semialdehyde dehydrogenase activity|0004350||IEA,oxidoreductase activity%2C acting on the aldehyde or oxo group of donors%2C NAD or NADP as acceptor|0016620||IEA	proline biosynthetic process|0006561||IEA		Catalyzes the NADPH-dependent reduction of L-glutamate 5-phosphate into L-glutamate 5-semialdehyde and phosphate. The product spontaneously undergoes cyclization to form 1-pyrroline-5- carboxylate	ko:K00147	ko00330,ko00332,ko01100,ko01110,ko01130,ko01230,map00330,map00332,map01100,map01110,map01130,map01230	M00015	R03313	RC00684	ko00000,ko00001,ko00002,ko01000	-	Aldedh	4797.53	0.0360011	0.228034	5.37649	0.61412	0.63018	4617.78	4690.14	5217.73	4276.38	5174.99	5676.32	4258.63	4734.17
WP_259101662.1	galactose-1-phosphate uridylyltransferase	UDP-glucose:hexose-1-phosphate uridylyltransferase activity|0008108||IEA	galactose metabolic process|0006012||IEA		Galactose-1-phosphate uridyl transferase, N-terminal domain	ko:K00965	ko00052,ko00520,ko01100,ko04917,map00052,map00520,map01100,map04917	M00362,M00554,M00632	R00955	RC00002	ko00000,ko00001,ko00002,ko01000	-	DUF4921,GalP_UDP_tr_C,GalP_UDP_transf	4788.87	-0.31545	0.170884	62.3398	5.1395e-11	3.48097e-10	5442.79	3308.6	4146.01	7321.12	3494.03	5137.82	4441.08	4373.62
WP_020249946.1	Crp/Fnr family transcriptional regulator	DNA-binding transcription factor activity|0003700||IEA,cAMP binding|0030552||IEA	regulation of DNA-templated transcription|0006355||IEA											4760.71	-0.263212	0.180195	25.3782	0.000650107	0.00128105	4654.7	5905.08	6153.83	4859.24	3529.18	4745.79	4412.39	3879.34
WP_259093163.1	AMP-binding protein				haloacid dehalogenase-like hydrolase	-	-	-	-	-	-	-	Acyltransferase,HAD,NAD_binding_4	4757.89	0.202649	0.362592	14.8638	0.0377853	0.0490842	3985.36	3536.04	6820.36	3125.51	6490.5	5204.94	5579.17	4586.3
WP_259095474.1	succinate dehydrogenase flavoprotein subunit	oxidoreductase activity%2C acting on the CH-CH group of donors|0016627||IEA,flavin adenine dinucleotide binding|0050660||IEA	tricarboxylic acid cycle|0006099||IEA,electron transport chain|0022900||IEA		Fumarate reductase flavoprotein C-term	ko:K00239	ko00020,ko00190,ko00650,ko00720,ko01100,ko01110,ko01120,ko01130,ko01200,ko05134,map00020,map00190,map00650,map00720,map01100,map01110,map01120,map01130,map01200,map05134	M00009,M00011,M00149,M00173,M00374,M00376	R02164	RC00045	ko00000,ko00001,ko00002,ko01000	-	FAD_binding_2,Succ_DH_flav_C	4729.83	0.0534643	0.135854	9.11878	0.24424	0.269411	4487.83	4869.98	4842.82	5308.22	4083.64	5018.97	4392.99	4656.47
WP_259096005.1	Flp pilus assembly protein CpaB													4692.55	-1.35535	0.291304	172.883	6.19082e-34	2.48321e-32	5206.35	1267.94	2291.5	10409.9	2386.11	3928.51	8446.1	2034.87
WP_259095879.1	threonine--tRNA ligase	threonine-tRNA ligase activity|0004829||IEA	threonyl-tRNA aminoacylation|0006435||IEA		Catalyzes the attachment of threonine to tRNA(Thr) in a two-step reaction L-threonine is first activated by ATP to form Thr-AMP and then transferred to the acceptor end of tRNA(Thr)	ko:K01868	ko00970,map00970	M00359,M00360	R03663	RC00055,RC00523	ko00000,ko00001,ko00002,ko01000,ko01007,ko03016	-	HGTP_anticodon,tRNA-synt_2b,tRNA_SAD	4683.07	-0.0673859	0.187681	5.52155	0.596586	0.613408	4564.33	5274.12	4547.66	4470.54	4845.68	5208.35	4207.04	4355.92
WP_259100499.1	translation initiation factor IF-2	translation initiation factor activity|0003743||IEA	translational initiation|0006413||IEA		One of the essential components for the initiation of protein synthesis. Protects formylmethionyl-tRNA from spontaneous hydrolysis and promotes its binding to the 30S ribosomal subunits. Also involved in the hydrolysis of GTP during the formation of the 70S ribosomal complex	ko:K02519	-	-	-	-	ko00000,ko03012,ko03029	-	GTP_EFTU,GTP_EFTU_D2,IF-2,IF2_N	4502.34	0.00383126	0.135161	16.8947	0.0180879	0.0254869	4410.44	5635.55	4554.45	4320.79	4483.05	4171.5	4032.52	4421.37
WP_259095438.1	endopeptidase La	serine-type endopeptidase activity|0004252||IEA,ATP binding|0005524||IEA,ATP hydrolysis activity|0016887||IEA	proteolysis|0006508||IEA		ATP-dependent serine protease that mediates the selective degradation of mutant and abnormal proteins as well as certain short-lived regulatory proteins. Required for cellular homeostasis and for survival from DNA damage and developmental changes induced by stress. Degrades polypeptides processively to yield small peptide fragments that are 5 to 10 amino acids long. Binds to DNA in a double-stran…	ko:K01338	ko04112,map04112	-	-	-	ko00000,ko00001,ko01000,ko01002	-	AAA,LON_substr_bdg,Lon_C	4475.61	0.210254	0.212833	8.48885	0.291465	0.316543	3525.21	4916.9	4294.69	4977.32	4498.61	4915.5	4546.24	4077.77
WP_259095447.1	glyceraldehyde dehydrogenase subunit alpha	iron ion binding|0005506||IEA,oxidoreductase activity%2C acting on the aldehyde or oxo group of donors|0016903||IEA,glyceraldehyde oxidoreductase activity|0043795||IEA			aldehyde oxidase and xanthine dehydrogenase, a b hammerhead	ko:K03520	-	-	R11168	RC02800	ko00000,ko01000	-	Ald_Xan_dh_C,Ald_Xan_dh_C2	4416.67	-0.520785	0.228304	95.6334	8.58336e-18	1.13502e-16	3865.46	7198.96	5378.87	2848.29	3211.92	2894.01	7161.15	2693.82
WP_259101055.1	elongation factor G	translation elongation factor activity|0003746||IEA	translational elongation|0006414||IEA		Catalyzes the GTP-dependent ribosomal translocation step during translation elongation. During this step, the ribosome changes from the pre-translocational (PRE) to the post- translocational (POST) state as the newly formed A-site-bound peptidyl-tRNA and P-site-bound deacylated tRNA move to the P and E sites, respectively. Catalyzes the coordinated movement of the two tRNA molecules, the mRNA and…	ko:K02355	-	-	-	-	ko00000,ko03012,ko03029	-	EFG_C,EFG_II,EFG_IV,GTP_EFTU,GTP_EFTU_D2	4412.85	0.449631	0.206514	91.4093	6.35211e-17	7.85312e-16	3895.77	7189.45	4982.27	2383.85	4677.08	4653.7	2477.39	5321.15
WP_259101452.1	ATP-dependent chaperone ClpB	ATP hydrolysis activity|0016887||IEA	protein folding|0006457||IEA		Part of a stress-induced multi-chaperone system, it is involved in the recovery of the cell from heat-induced damage, in cooperation with DnaK, DnaJ and GrpE	ko:K03695	ko04213,map04213	-	-	-	ko00000,ko00001,ko03110	-	AAA,AAA_2,ClpB_D2-small,Clp_N	4405.86	-1.16623	0.224561	54.7275	1.68822e-09	9.20343e-09	6732.91	3439.34	3309.9	4497.98	3358.42	6371.88	3822.22	2999.8
WP_259101502.1	DEAD/DEAH box helicase	nucleic acid binding|0003676||IEA,ATP binding|0005524||IEA			Domain of unknown function (DUF1998)	ko:K06877	-	-	-	-	ko00000	-	DEAD,DUF1998,Helicase_C	4384.53	-0.181838	0.24771	70.063	1.43477e-12	1.15357e-11	4667.21	8328.66	4897.82	3031.45	3158.81	4281.17	2359.05	4114.61
WP_259096526.1	HNH endonuclease	nucleic acid binding|0003676||IEA,endonuclease activity|0004519||IEA			PFAM HNH endonuclease	-	-	-	-	-	-	-	HNH_5	4381.77	-1.1505	0.243493	85.7607	9.15864e-16	1.00495e-14	5732.38	2471.07	3162.68	7299.71	2650.63	4153.76	6018.09	2582.41
WP_259100984.1	S41 family peptidase				Belongs to the peptidase S41A family	ko:K03797	-	-	-	-	ko00000,ko01000,ko01002	-	PDZ_2,Peptidase_S41	4379.43	-0.15764	0.166804	36.1364	6.83192e-06	2.0299e-05	4204.85	5386.85	4880.93	5052.17	3205.77	4974.61	3336.68	3769.53
WP_259095807.1	lactonase family protein	carboxylic ester hydrolase activity|0052689||IEA			COG2706 3-carboxymuconate cyclase	ko:K07404	ko00030,ko01100,ko01110,ko01120,ko01130,ko01200,map00030,map01100,map01110,map01120,map01130,map01200	M00004,M00006,M00008	R02035	RC00537	ko00000,ko00001,ko00002,ko01000	-	Lactonase	4361.13	-0.0561946	0.196559	10.1132	0.182248	0.205585	4182.49	4257.15	5044.19	5306.6	3548.21	4350.19	4134.48	4022.41
WP_018194937.1	single-stranded DNA-binding protein	single-stranded DNA binding|0003697||IEA	DNA replication|0006260||IEA,DNA repair|0006281||IEA,DNA recombination|0006310||IEA,DNA-templated transcription|0006351||IEA											4351.53	-1.13274	0.540595	40.5961	9.67729e-07	3.32082e-06	4559.56	1886.64	1484.69	6518.64	1690.38	8103.31	6647	2079.35
WP_259093274.1	hypothetical protein												oxidoreductase activity|0016491||IEA,oxidoreductase activity%2C acting on NAD(P)H|0016651||IEA	4339.94	-1.15096	0.265781	290.747	5.7168e-59	1.7198e-56	4586.58	767.559	1426.36	5697.42	2117.33	3642.12	12704.8	2065.34
WP_259101051.1	30S ribosomal protein S12	structural constituent of ribosome|0003735||IEA	translation|0006412||IEA		Interacts with and stabilizes bases of the 16S rRNA that are involved in tRNA selection in the A site and with the mRNA backbone. Located at the interface of the 30S and 50S subunits, it traverses the body of the 30S subunit contacting proteins on the other side and probably holding the rRNA structure together. The combined cluster of proteins S8, S12 and S17 appears to hold together the shoulder…	ko:K02950	ko03010,map03010	M00178,M00179	-	-	br01610,ko00000,ko00001,ko00002,ko03011	-	Ribosom_S12_S23	4295.64	-0.0187774	0.21913	66.3107	8.19561e-12	6.03799e-11	3867.02	7831.77	4178.78	2411.48	4367.43	3770.44	4106.19	3817
WP_018196651.1	replicative DNA helicase	DNA helicase activity|0003678||IEA	DNA replication|0006260||IEA		Participates in initiation and elongation during chromosome replication	ko:K02314	ko03030,ko04112,map03030,map04112	-	-	-	ko00000,ko00001,ko01000,ko03032	-	DnaB,DnaB_C	4294.73	0.083696	0.224517	49.0541	2.21426e-08	1.03409e-07	3787.11	6280.62	5488.15	3132.56	5399.29	4494.86	2528.25	4013
WP_259095240.1	HEAT repeat domain-containing protein													4276.15	-0.309809	0.262344	31.6169	4.78242e-05	0.00012031	5216.69	6208.91	2756.48	4974.64	2768.3	3768	3298.3	4208.73
WP_259095331.1	ammonium transporter	ammonium transmembrane transporter activity|0008519||IEA	ammonium transmembrane transport|0072488||IEA		Ammonium Transporter Family	ko:K03320	-	-	-	-	ko00000,ko02000	1.A.11	Ammonium_transp	4240.47	-6.92777	1.34007	62.4509	4.8828e-11	3.32482e-10	13175.8	99.117	164.447	10267.1	178.324	7160.04	57.9549	108.211
WP_259098017.1	ATP-dependent protease ATPase subunit HslU	ATP binding|0005524||IEA,peptidase activity|0008233||IEA,ATP hydrolysis activity|0016887||IEA			this subunit has chaperone activity. The binding of ATP and its subsequent hydrolysis by HslU are essential for unfolding of protein substrates subsequently hydrolyzed by HslV. HslU recognizes the N-terminal part of its protein substrates and unfolds these before they are guided to HslV for hydrolysis	ko:K03667	-	-	-	-	ko00000,ko03110	-	AAA_2,ClpB_D2-small	4225.78	0.0320308	0.114708	14.8796	0.0375738	0.0488271	4293.07	4653.7	3911.82	4617.01	3593.21	3878.95	4154.31	4388.64
WP_259098901.1	NosD domain-containing protein													4194.99	-0.0220131	0.17187	81.4562	6.94991e-15	6.93072e-14	3584.68	6130.1	3905.64	2398.96	3680.21	4559.07	5503.55	3529.65
WP_259094296.1	DUF1559 domain-containing protein				general secretion pathway protein	ko:K02456,ko:K02679	ko03070,ko05111,map03070,map05111	M00331	-	-	ko00000,ko00001,ko00002,ko02044	3.A.15	N_methyl,SBP_bac_10	4184.23	-0.94573	0.248509	26.6428	0.000386378	0.000803933	5548.05	4767.55	4693.81	3991.74	2822.72	4995.35	3490.16	2880.52
WP_259101416.1	hypothetical protein												oxidoreductase activity|0016491||IEA	4170.27	-0.425723	0.30329	38.8951	2.04658e-06	6.61429e-06	3939.08	6497.97	4437.33	3573.06	2706.34	6273.65	2603.27	2932.49
WP_259095190.1	DUF72 domain-containing protein				Protein of unknown function DUF72	-	-	-	-	-	-	-	DUF72	4165.35	-0.814458	0.27949	129.19	9.28097e-25	2.16157e-23	4186.96	1054.65	3141.97	7301.31	2943.37	4144.47	7420.71	2380.88
WP_259102113.1	sugar phosphate isomerase/epimerase family protein	catalytic activity|0003824||IEA			myo-inosose-2 dehydratase activity	-	-	-	-	-	-	-	AP_endonuc_2,AP_endonuc_2_N	4145.04	0.164104	0.253216	12.3888	0.0884756	0.106608	3386.58	4999.83	4711.82	3127.77	4607.26	4691.5	4184.31	3794.25
WP_259101066.1	50S ribosomal protein L2	structural constituent of ribosome|0003735||IEA	translation|0006412||IEA		One of the primary rRNA binding proteins. Required for association of the 30S and 50S subunits to form the 70S ribosome, for tRNA binding and peptide bond formation. It has been suggested to have peptidyltransferase activity	ko:K02886	ko03010,map03010	M00178,M00179	-	-	br01610,ko00000,ko00001,ko00002,ko03011	-	Ribosomal_L2,Ribosomal_L2_C	4125.33	0.327542	0.188544	110.028	9.06209e-21	1.51454e-19	3821.58	6491.69	3942.62	2358.91	4873.37	4802.84	2104.28	4795.74
WP_259096495.1	molybdopterin-synthase adenylyltransferase MoeB	ubiquitin-like modifier activating enzyme activity|0008641||IEA			PFAM UBA THIF-type NAD FAD binding protein	ko:K21029,ko:K21147	ko04122,map04122	-	R07459,R07461	RC00043	ko00000,ko00001,ko01000	-	Rhodanese,ThiF	4116.76	0.472007	0.356215	41.1463	7.58884e-07	2.65978e-06	3616.72	6286.37	4004.9	1819.86	5629.18	4927.58	2100.17	5016.15
WP_018196259.1	50S ribosomal protein L11	structural constituent of ribosome|0003735||IEA	translation|0006412||IEA		Forms part of the ribosomal stalk which helps the ribosome interact with GTP-bound translation factors	ko:K02867	ko03010,map03010	M00178,M00179	-	-	br01610,ko00000,ko00001,ko00002,ko03011	-	Ribosomal_L11,Ribosomal_L11_N	4104.31	0.499726	0.189999	48.9572	2.31321e-08	1.07751e-07	3622.79	6298.66	3735.98	3175.37	3465.92	3877.56	3200.3	5122.31
WP_259096499.1	F0F1 ATP synthase subunit beta	proton-transporting ATP synthase activity%2C rotational mechanism|0046933||IEA	proton motive force-driven ATP synthesis|0015986||IEA		Produces ATP from ADP in the presence of a proton gradient across the membrane. The catalytic sites are hosted primarily by the beta subunits	ko:K02112	ko00190,ko00195,ko01100,map00190,map00195,map01100	M00157	-	-	ko00000,ko00001,ko00002,ko00194,ko01000	3.A.2.1	ATP-synt_ab,ATP-synt_ab_N	4101.28	0.591794	0.289153	18.72	0.0091113	0.0138194	3217.11	5373.56	4599.08	2820.38	4945.07	4225.55	3228.18	4848.51
WP_259096745.1	ferredoxin family protein				ferredoxin	ko:K05524	-	-	-	-	ko00000	-	Fer4	4083.7	0.876882	0.263531	42.4323	4.29246e-07	1.56999e-06	2484.35	4227.08	2936.7	2870.52	3396.46	5366.26	6214.83	4561.96
WP_259100348.1	DNA repair protein RadA	ATP binding|0005524||IEA	DNA repair|0006281||IEA		DNA-dependent ATPase involved in processing of recombination intermediates, plays a role in repairing DNA breaks. Stimulates the branch migration of RecA-mediated strand transfer reactions, allowing the 3' invading strand to extend heteroduplex DNA faster. Binds ssDNA in the presence of ADP but not other nucleotides, has ATPase activity that is stimulated by ssDNA and various branched DNA structu…	ko:K04485	-	-	-	-	ko00000,ko03400	-	AAA_25,ATPase,ChlI	4083.39	-1.35473	0.296443	255.247	2.11619e-51	3.47248e-49	3809.97	649.295	1317.23	7703.77	1978.57	3637.59	10457.4	1489.59
WP_259096770.1	homoserine dehydrogenase	homoserine dehydrogenase activity|0004412||IEA	amino acid metabolic process|0006520||IEA		PFAM Homoserine dehydrogenase	ko:K00003	ko00260,ko00270,ko00300,ko01100,ko01110,ko01120,ko01130,ko01230,map00260,map00270,map00300,map01100,map01110,map01120,map01130,map01230	M00017,M00018	R01773,R01775	RC00087	ko00000,ko00001,ko00002,ko01000	-	ACT,Homoserine_dh,NAD_binding_3	4082.59	0.142122	0.204831	0.654216	0.998663	0.998663	3897.76	4140.31	3973.98	4062.6	4124.03	4156.76	3982.09	4300.82
WP_018196433.1	DUF1559 domain-containing protein				Prokaryotic N-terminal methylation motif	ko:K02456,ko:K02650	ko02020,ko03070,ko05111,map02020,map03070,map05111	M00331	-	-	ko00000,ko00001,ko00002,ko02035,ko02044	3.A.15,3.A.15.2	N_methyl,SBP_bac_10,T2SSG	4076.84	-1.11844	0.367735	24.815	0.000818258	0.00157374	5233.38	5919.29	4044.96	4285.19	2405.47	5017.52	2730.69	2410.47
WP_259096188.1	hypothetical protein												galactonate dehydratase activity|0008869||IEA	4073.72	-0.189651	0.396058	86.3305	7.00027e-16	7.75184e-15	5869.1	588.303	1203.44	4212.6	4827.61	6084.52	3952.66	5146.1
WP_259094289.1	threonine synthase	threonine synthase activity|0004795||IEA	threonine biosynthetic process|0009088||IEA		Catalyzes the gamma-elimination of phosphate from L- phosphohomoserine and the beta-addition of water to produce L- threonine	ko:K01733	ko00260,ko00750,ko01100,ko01110,ko01120,ko01230,map00260,map00750,map01100,map01110,map01120,map01230	M00018	R01466,R05086	RC00017,RC00526	ko00000,ko00001,ko00002,ko01000	-	PALP	4070.29	0.667332	0.257712	29.0578	0.000141218	0.000322249	3225.78	6080.04	3808.88	2669.86	3994.41	3648.32	3900.1	5122.47
WP_259098254.1	chaperonin GroEL	protein binding|0005515||IEA,ATP hydrolysis activity|0016887||IEA	protein folding|0006457||IEA		Prevents misfolding and promotes the refolding and proper assembly of unfolded polypeptides generated under stress conditions	ko:K04077	ko03018,ko04212,ko04940,ko05134,ko05152,map03018,map04212,map04940,map05134,map05152	-	-	-	ko00000,ko00001,ko03019,ko03029,ko03110,ko04147	-	Cpn60_TCP1	4064.94	0.692409	0.206231	194.041	2.09522e-38	1.18184e-36	2601.61	9843.41	3428.44	2161.36	4101.96	3949.53	2029.27	4204.12
WP_259091982.1	endonuclease III	DNA-(apurinic or apyrimidinic site) endonuclease activity|0003906||IEA	DNA repair|0006281||IEA		DNA repair enzyme that has both DNA N-glycosylase activity and AP-lyase activity. The DNA N-glycosylase activity releases various damaged pyrimidines from DNA by cleaving the N- glycosidic bond, leaving an AP (apurinic apyrimidinic) site. The AP-lyase activity cleaves the phosphodiester bond 3' to the AP site by a beta-elimination, leaving a 3'-terminal unsaturated sugar and a product with a term…	ko:K10773	ko03410,map03410	-	-	-	ko00000,ko00001,ko01000,ko03400	-	HhH-GPD	4053.24	-1.40277	0.269385	300.817	4.04758e-61	1.46118e-58	5029.8	350.065	1384.61	6542.73	2367.57	5146.3	8250.9	1902.49
WP_259092651.1	prepilin-type N-terminal cleavage/methylation domain-containing protein				Required for transformation and DNA binding	ko:K02245,ko:K02456	ko03070,ko05111,map03070,map05111	M00331,M00429	-	-	ko00000,ko00001,ko00002,ko02044	3.A.15	N_methyl	4048.03	-2.23813	0.361298	69.6739	1.71948e-12	1.3733e-11	4680.21	7229.29	4155.66	4586.35	1745.45	3401.74	4861.78	992.133
WP_259101076.1	elongation factor G	translation elongation factor activity|0003746||IEA	translational elongation|0006414||IEA		elongation factor Tu domain 2 protein	ko:K02355	-	-	-	-	ko00000,ko03012,ko03029	-	EFG_C,EFG_II,EFG_IV,GTP_EFTU,GTP_EFTU_D2	4023.49	0.482944	0.17883	90.9944	7.73008e-17	9.30187e-16	3296.07	6732.85	4298.76	2650.68	4248.93	3934.11	2587.47	4605.96
WP_259102219.1	lytic transglycosylase domain-containing protein	hydrolase activity%2C acting on glycosyl bonds|0016798||IEA		GH23	PFAM Lytic transglycosylase catalytic	ko:K08309	-	-	-	-	ko00000,ko01000,ko01011	-	SLT	4022.93	-0.570707	0.169608	106.511	4.85498e-20	7.65349e-19	4845.87	2137.98	2896.11	5877.46	3007.36	4757.65	4684.46	3262.42
WP_259099886.1	chaperonin GroEL	protein binding|0005515||IEA,ATP hydrolysis activity|0016887||IEA	protein folding|0006457||IEA		Prevents misfolding and promotes the refolding and proper assembly of unfolded polypeptides generated under stress conditions	ko:K04077	ko03018,ko04212,ko04940,ko05134,ko05152,map03018,map04212,map04940,map05134,map05152	-	-	-	ko00000,ko00001,ko03019,ko03029,ko03110,ko04147	-	Cpn60_TCP1	4009.47	0.86316	0.266056	193.706	2.46724e-38	1.37027e-36	1973.54	11827.7	2849.36	2142.85	4116.3	3757.98	1467.54	3589.37
WP_259094855.1	clostripain-related cysteine peptidase												protein binding|0005515||IEA	4000.63	-1.27446	0.221765	91.1321	7.24267e-17	8.83312e-16	5551.8	2208.94	3066.63	4033.17	3376.53	6827.32	4126.53	2294.72
WP_259092895.1	hypothetical protein													3994.63	0.426398	0.260566	51.9808	5.88968e-09	2.97783e-08	3337.3	5158.33	5845.48	1710.28	4251.68	4657.69	3214.27	4484.65
WP_259099586.1	1-deoxy-D-xylulose-5-phosphate synthase	1-deoxy-D-xylulose-5-phosphate synthase activity|0008661||IEA	pyridoxine biosynthetic process|0008615||IEA,thiamine biosynthetic process|0009228||IEA,isopentenyl diphosphate biosynthetic process|0009240||IEA		Catalyzes the acyloin condensation reaction between C atoms 2 and 3 of pyruvate and glyceraldehyde 3-phosphate to yield 1-deoxy-D-xylulose-5-phosphate (DXP)	ko:K01662	ko00730,ko00900,ko01100,ko01110,ko01130,map00730,map00900,map01100,map01110,map01130	M00096	R05636	RC00032	ko00000,ko00001,ko00002,ko01000	-	DXP_synthase_N,Transket_pyr,Transketolase_C	3974.16	0.526841	0.237218	30.0477	9.30641e-05	0.000219857	3172.15	5519.08	3941.44	2693.48	4740.58	4297.55	3103.39	4570.19
WP_302898660.1	recombinase RecA	DNA binding|0003677||IEA,ATP-dependent activity%2C acting on DNA|0008094||IEA	DNA repair|0006281||IEA,DNA recombination|0006310||IEA,SOS response|0009432||IEA		Can catalyze the hydrolysis of ATP in the presence of single-stranded DNA, the ATP-dependent uptake of single-stranded DNA by duplex DNA, and the ATP-dependent hybridization of homologous single-stranded DNAs. It interacts with LexA causing its activation and leading to its autocatalytic cleavage	ko:K03553	ko03440,map03440	M00729	-	-	ko00000,ko00001,ko00002,ko03400	-	RecA	3956.64	-0.537756	0.215436	27.2827	0.000296398	0.000633885	4408.62	3499.42	2801.47	4769.79	3077.33	4447.91	4933.87	3036.55
WP_018196105.1	pilus assembly protein												NAD+ kinase activity|0003951||IEA	3922.66	-1.38307	0.300227	210.542	6.6978e-42	5.25631e-40	5346.96	469.567	1443.76	7108.02	2031.8	4192	7282.44	2050.12
WP_259100799.1	16S rRNA (cytosine(967)-C(5))-methyltransferase RsmB	RNA binding|0003723||IEA,methyltransferase activity|0008168||IEA	RNA methylation|0001510||IEA,regulation of DNA-templated transcription|0006355||IEA		Specifically methylates the cytosine at position 967 (m5C967) of 16S rRNA	ko:K03500	-	-	-	-	ko00000,ko01000,ko03009	-	Methyltr_RsmB-F,Methyltr_RsmF_N,NusB	3889.58	0.163189	0.184204	13.1922	0.0675628	0.0833282	3464.95	3553.36	3319.97	3616.76	3912.4	4319.22	4868.87	3878.88
WP_259094966.1	hypothetical protein													3879.1	-0.543949	0.249163	74.5982	1.73046e-13	1.53112e-12	3239.34	7683.85	4341.05	4270.25	2344.12	3526.77	3048.31	2221.43
WP_259095922.1	hypothetical protein													3874.35	-1.11297	0.258186	212.69	2.34693e-42	1.92555e-40	3599.66	1086.35	1967.19	6542.99	2306.66	3511.54	9157.83	1664.3
WP_259095313.1	carbohydrate binding domain-containing protein	hydrolase activity%2C acting on glycosyl bonds|0016798||IEA		GH148+CBM4+GH148	Belongs to the glycosyl hydrolase 5 (cellulase A) family	-	-	-	-	-	-	-	CBM_4_9,Cellulase,Glyco_hydro_2_C,Glyco_hydro_42,Glycos_transf_2	3849.49	0.601343	0.288225	18.3885	0.0103349	0.0154424	2793.46	4811.63	4859.97	2655.6	4642.86	4081.74	3314.06	4237.89
WP_259096826.1	DUF86 domain-containing protein				Protein of unknown function DUF86	ko:K06949	ko00730,ko01100,map00730,map01100	-	R00615,R02135	RC00002,RC00017	ko00000,ko00001,ko01000,ko03009	-	DUF86,RNHCP,RsgA_GTPase	3848.87	0.206754	0.121577	19.0876	0.00791741	0.012204	3265.07	4258.72	4131.5	3832.19	3252.99	3947.94	4229.92	3768.25
WP_018196841.1	4Fe-4S binding protein													3845.46	0.0779262	0.169544	28.8566	0.000153661	0.000349098	3379.27	4444.36	4826.82	2877.36	3243.38	4192.13	4359.93	3566.87
WP_259101606.1	xanthine dehydrogenase family protein subunit M				CO dehydrogenase flavoprotein C-terminal domain	ko:K11178	ko00230,ko01100,ko01120,map00230,map01100,map01120	M00546	R01768,R02103	RC00143	ko00000,ko00001,ko00002,ko01000	-	CO_deh_flav_C,FAD_binding_5	3838.84	0.409209	0.255826	12.6053	0.0823285	0.0997	3226.31	4479.25	3849.25	2837.49	4262.57	4515.16	3401.53	4283.85
WP_302898690.1	cysteine desulfurase	pyridoxal phosphate binding|0030170||IEA,cysteine desulfurase activity|0031071||IEA	cysteine metabolic process|0006534||IEA		Catalyzes the removal of elemental sulfur and selenium atoms from L-cysteine, L-cystine, L-selenocysteine, and L- selenocystine to produce L-alanine	ko:K11717	ko00450,ko01100,map00450,map01100	-	R03599,R11528	RC00961,RC01789,RC02313	ko00000,ko00001,ko01000	-	Aminotran_5	3820.88	0.255685	0.192862	15.3306	0.0319874	0.0422211	3277.37	4363.32	5216.87	3476.01	3659.91	3415.47	3656.75	3913.04
WP_259100696.1	aminomethyl-transferring glycine dehydrogenase subunit GcvPB	glycine dehydrogenase (decarboxylating) activity|0004375||IEA	glycine catabolic process|0006546||IEA		The glycine cleavage system catalyzes the degradation of glycine. The P protein binds the alpha-amino group of glycine through its pyridoxal phosphate cofactor	ko:K00283	ko00260,ko00630,ko01100,ko01110,ko01130,ko01200,map00260,map00630,map01100,map01110,map01130,map01200	-	R01221,R03425	RC00022,RC00929,RC02834,RC02880	ko00000,ko00001,ko01000	-	Aminotran_5,GDC-P	3773.05	0.513716	0.256089	10.5108	0.161425	0.184257	3039.1	3377.63	3378.3	3250.21	4221.13	3909.71	4687.37	4338.71
WP_259098938.1	DUF1559 domain-containing protein				Required for transformation and DNA binding	ko:K02245,ko:K02456	ko03070,ko05111,map03070,map05111	M00331,M00429	-	-	ko00000,ko00001,ko00002,ko02044	3.A.15	N_methyl	3762.2	-1.0483	0.330981	61.4513	7.74069e-11	5.12732e-10	3601.55	7993.81	3202.46	4112.83	1758.28	3994.89	2837.72	1741.49
WP_259094267.1	chorismate synthase	chorismate synthase activity|0004107||IEA	aromatic amino acid family biosynthetic process|0009073||IEA		Catalyzes the anti-1,4-elimination of the C-3 phosphate and the C-6 proR hydrogen from 5-enolpyruvylshikimate-3-phosphate (EPSP) to yield chorismate, which is the branch point compound that serves as the starting substrate for the three terminal pathways of aromatic amino acid biosynthesis. This reaction introduces a second double bond into the aromatic ring system	ko:K01736	ko00400,ko01100,ko01110,ko01130,ko01230,map00400,map01100,map01110,map01130,map01230	M00022	R01714	RC00586	ko00000,ko00001,ko00002,ko01000	-	Chorismate_synt	3723.07	0.429559	0.264756	8.67768	0.276633	0.301998	3105.9	3570.91	4935.17	3176.52	4006.07	3360.13	3945.26	4182.98
WP_259094216.1	cytochrome c family protein													3718.83	-0.347692	0.214984	25.3729	0.000651523	0.00128314	4039.25	4880.85	3040.74	4241.35	2583.36	4133.62	3052.8	3174.17
WP_259092827.1	ketol-acid reductoisomerase				Involved in the biosynthesis of branched-chain amino acids (BCAA). Catalyzes an alkyl-migration followed by a ketol- acid reduction of (S)-2-acetolactate (S2AL) to yield (R)-2,3- dihydroxy-isovalerate. In the isomerase reaction, S2AL is rearranged via a Mg-dependent methyl migration to produce 3- hydroxy-3-methyl-2-ketobutyrate (HMKB). In the reductase reaction, this 2-ketoacid undergoes a metal-…	ko:K00053	ko00290,ko00770,ko01100,ko01110,ko01130,ko01210,ko01230,map00290,map00770,map01100,map01110,map01130,map01210,map01230	M00019,M00570	R03051,R04439,R04440,R05068,R05069,R05071	RC00726,RC00836,RC00837,RC01726	ko00000,ko00001,ko00002,ko01000	-	IlvC,IlvN	3703.36	0.393141	0.210988	12.4845	0.0857099	0.103517	3165.48	3597.06	3518.94	3147.07	4610.12	4317.13	3355.21	4156.66
WP_259095744.1	tRNA (N6-isopentenyl adenosine(37)-C2)-methylthiotransferase MiaB	transferase activity%2C transferring sulphur-containing groups|0016782||IEA,4 iron%2C 4 sulfur cluster binding|0051539||IEA,S-adenosyl-L-methionine binding|1904047||IEA	tRNA modification|0006400||IEA		Catalyzes the methylthiolation of N6- (dimethylallyl)adenosine (i(6)A), leading to the formation of 2- methylthio-N6-(dimethylallyl)adenosine (ms(2)i(6)A) at position 37 in tRNAs that read codons beginning with uridine	ko:K06168	-	-	R10645,R10646,R10647	RC00003,RC00980,RC03221,RC03222	ko00000,ko01000,ko03016	-	Radical_SAM,TRAM,UPF0004	3699.99	-0.176983	0.196746	18.5041	0.00989118	0.0148594	3858.35	4821.07	4109.17	3248.73	3793.63	3677.46	2845.91	3413.22
WP_259099108.1	Gfo/Idh/MocA family oxidoreductase	oxidoreductase activity|0016491||IEA,oxidoreductase activity%2C acting on NAD(P)H|0016651||IEA		GH177	inositol 2-dehydrogenase activity	-	-	-	-	-	-	-	GFO_IDH_MocA,TAT_signal	3688.19	0.388297	0.25736	7.63735	0.365655	0.389844	3031.01	3720.42	4118.52	3375.86	4300.25	4230.98	3108.87	3967.07
WP_259096037.1	FecR family protein													3686.36	-1.79267	0.337444	184.546	2.13429e-36	1.05545e-34	5346.69	401.203	1333.01	6163.48	1745.88	4550.65	6975.29	1543.4
WP_259095062.1	glutamine--fructose-6-phosphate transaminase (isomerizing)	glutamine-fructose-6-phosphate transaminase (isomerizing) activity|0004360||IEA	amino sugar metabolic process|0006040||IEA,peptidoglycan biosynthetic process|0009252||IEA		Catalyzes the first step in hexosamine metabolism, converting fructose-6P into glucosamine-6P using glutamine as a nitrogen source	ko:K00820	ko00250,ko00520,ko01100,ko01130,ko04931,map00250,map00520,map01100,map01130,map04931	-	R00768	RC00010,RC00163,RC02752	ko00000,ko00001,ko01000,ko01002	-	GATase_6,SIS	3677.45	-0.489544	0.218452	138.218	1.20079e-26	3.16805e-25	3707.84	1088.5	2449.52	4835.42	3981.78	4840.22	5567.97	2640.45
WP_259095723.1	glycoside hydrolase family 99-like domain-containing protein			GH99									ATP binding|0005524||IEA	3651.12	-0.818939	0.235636	62.4475	4.89053e-11	3.32482e-10	4089.02	2044.28	2650.53	4875.9	2946.56	4866.33	4849.97	2318.01
WP_259095559.1	lipoyl synthase	lipoate synthase activity|0016992||IEA,4 iron%2C 4 sulfur cluster binding|0051539||IEA,S-adenosyl-L-methionine binding|1904047||IEA	lipoate biosynthetic process|0009107||IEA		Catalyzes the radical-mediated insertion of two sulfur atoms into the C-6 and C-8 positions of the octanoyl moiety bound to the lipoyl domains of lipoate-dependent enzymes, thereby converting the octanoylated domains into lipoylated derivatives	ko:K03644	ko00785,ko01100,map00785,map01100	-	R07767,R07768	RC01978	ko00000,ko00001,ko01000	-	LIAS_N,Lip_prot_lig_C,Radical_SAM	3633.41	0.380159	0.183005	37.1424	4.40803e-06	1.35199e-05	3005.57	4864.23	5083.14	3277.72	2995.45	3088.31	3110.87	3912.6
WP_259098794.1	tRNA (N(6)-L-threonylcarbamoyladenosine(37)-C(2))-methylthiotransferase MtaB	4 iron%2C 4 sulfur cluster binding|0051539||IEA,S-adenosyl-L-methionine binding|1904047||IEA	tRNA modification|0006400||IEA		SMART Elongator protein 3 MiaB NifB	ko:K18707	-	-	R10649	RC00003,RC03221	ko00000,ko01000,ko03016	-	Radical_SAM,TRAM,UPF0004	3617.17	-0.5461	0.208688	36.6611	5.43737e-06	1.63847e-05	3803.69	3460.35	3199.84	5461.38	2527.04	3693.84	3683.86	2604.85
WP_259097399.1	DUF1549 and DUF1553 domain-containing protein				Protein of unknown function (DUF1549)	-	-	-	-	-	-	-	PSCyt2,PSD1	3605.21	-0.265923	0.241255	628.92	1.43723e-131	5.18839e-128	1710.7	7888.04	17296	914.04	1124.94	1294.56	927.351	1422.92
WP_259100699.1	aconitate hydratase AcnA	aconitate hydratase activity|0003994||IEA	tricarboxylic acid cycle|0006099||IEA		aconitate hydratase	ko:K01681	ko00020,ko00630,ko00720,ko01100,ko01110,ko01120,ko01130,ko01200,ko01210,ko01230,map00020,map00630,map00720,map01100,map01110,map01120,map01130,map01200,map01210,map01230	M00009,M00010,M00012,M00173,M00740	R01324,R01325,R01900	RC00497,RC00498,RC00618	br01601,ko00000,ko00001,ko00002,ko01000	-	Aconitase,Aconitase_C	3604.73	-0.0631619	0.158436	24.8119	0.00081932	0.00157494	3532.57	4314.17	3484.08	3703.34	3606.33	4145.65	2631.27	3380.75
WP_259099673.1	DUF87 domain-containing protein													3604.32	-0.264053	0.204895	70.9008	9.7137e-13	7.91568e-12	3074.28	6326.34	4557.66	3721.48	2964.82	3259.69	2475.29	2559.63
WP_259092181.1	MoxR family ATPase	ATP binding|0005524||IEA,ATP hydrolysis activity|0016887||IEA			PFAM ATPase associated with various cellular activities AAA_3	ko:K03924	-	-	-	-	ko00000,ko01000	-	AAA_3	3599.23	-0.982057	0.215695	162.128	1.14347e-31	4.12791e-30	4071.49	1365.17	2175.71	5214.29	2484.47	4004.23	6571.39	2060.99
WP_259094962.1	glucosamine-6-phosphate deaminase	glucosamine-6-phosphate deaminase activity|0004342||IEA	N-acetylglucosamine catabolic process|0006046||IEA		Catalyzes the reversible isomerization-deamination of glucosamine 6-phosphate (GlcN6P) to form fructose 6-phosphate (Fru6P) and ammonium ion	ko:K02564	ko00520,ko01100,map00520,map01100	-	R00765	RC00163	ko00000,ko00001,ko01000	-	Glucosamine_iso	3598.65	0.429336	0.189413	86.5521	6.30549e-16	7.04731e-15	2709.05	6570.46	3649.54	2565.03	4056.44	3162.95	2597.88	3647.38
WP_259092484.1	pyruvate ferredoxin oxidoreductase				PFAM pyruvate flavodoxin ferredoxin oxidoreductase domain protein	ko:K00169	ko00010,ko00020,ko00620,ko00633,ko00640,ko00650,ko00680,ko00720,ko01100,ko01120,ko01130,ko01200,map00010,map00020,map00620,map00633,map00640,map00650,map00680,map00720,map01100,map01120,map01130,map01200	M00173,M00307,M00374,M00620	R01196,R01199,R08034	RC00004,RC00250,RC02742,RC02833	br01601,ko00000,ko00001,ko00002,ko01000	-	PFOR_II,POR_N	3597.73	-0.387426	0.195045	107.204	3.48878e-20	5.57279e-19	3549.47	1706.47	2694.58	4900.49	3017.19	3816.9	5889.04	2713.19
WP_259091811.1	NADH-quinone oxidoreductase subunit NuoG	NADH dehydrogenase (quinone) activity|0050136||IEA	mitochondrial electron transport%2C NADH to ubiquinone|0006120||IEA		Catalyzes the transfer of electrons from NADH to quinone	ko:K00336	ko00190,ko01100,map00190,map01100	M00144	R11945	RC00061	ko00000,ko00001,ko00002,ko01000	3.D.1	Fer2_4,Molybdop_Fe4S4,Molybdopterin,Molydop_binding,NADH-G_4Fe-4S_3	3586.65	0.447402	0.260847	19.2302	0.00749601	0.011604	2718.39	4019.08	3879.14	2303.41	3966.41	4295.55	4028.49	3706.82
WP_259101386.1	glycosyl hydrolase			GH106	-	-	-	-	-	-	-	-	Glyco_hydro_106	3540.89	0.714534	0.262449	19.876	0.00584387	0.00927733	2545.23	4387.28	4292.3	2761.04	4252.08	3563.16	2837.59	4175.98
WP_259100122.1	ATP-dependent Clp protease ATP-binding subunit ClpX	ATP binding|0005524||IEA,zinc ion binding|0008270||IEA,ATP hydrolysis activity|0016887||IEA,protein dimerization activity|0046983||IEA			ATP-dependent specificity component of the Clp protease. It directs the protease to specific substrates. Can perform chaperone functions in the absence of ClpP	ko:K03544	ko04112,map04112	-	-	-	ko00000,ko00001,ko03110	-	AAA_2,ClpB_D2-small,zf-C4_ClpX	3515.55	0.487162	0.280652	11.191	0.130503	0.151875	2827.81	3794.88	3819.76	3260.62	4069.98	4129.93	2544.16	3963.51
WP_018194993.1	YceI family protein				YceI-like domain	-	-	-	-	-	-	-	YceI	3509.48	-0.0335788	0.158179	206.103	5.84767e-41	4.05963e-39	3243.72	7662.18	2850.62	2097.27	2688.3	3453.2	2419.3	3167.87
WP_259100436.1	putative sugar nucleotidyl transferase				nucleotidyltransferase activity	-	-	-	-	-	-	-	NTP_transf_4	3506.23	0.570321	0.317478	25.136	0.000717794	0.00139464	2701.28	4550.42	2651.47	1848.49	4485	3818.48	4025.38	4010.67
WP_259094632.1	carbamoyl-phosphate synthase large subunit	ATP binding|0005524||IEA,metal ion binding|0046872||IEA	nitrogen compound metabolic process|0006807||IEA		Carbamoyl-phosphate synthetase ammonia chain	ko:K01955	ko00240,ko00250,ko01100,map00240,map00250,map01100	M00051	R00256,R00575,R01395,R10948,R10949	RC00002,RC00010,RC00043,RC02750,RC02798,RC03314	ko00000,ko00001,ko00002,ko01000	-	CPSase_L_D2,CPSase_L_D3,MGS	3504.04	0.451407	0.240226	19.0257	0.00810711	0.0124698	2659.21	4881.54	3625.77	3498.42	3826.24	3347.82	2705.14	3636.16
WP_259093742.1	type II toxin-antitoxin system HicB family antitoxin				PFAM Uncharacterised protein family UPF0150	-	-	-	-	-	-	-	HicB_lk_antitox	3453.98	0.364819	0.235738	30.5239	7.60843e-05	0.00018311	2775.89	5573.19	3338.73	2766.17	3206.97	3476.39	2799.4	3574.35
WP_020250093.1	HD domain-containing protein				PFAM Metal-dependent phosphohydrolase, HD	ko:K09163	-	-	-	-	ko00000	-	HD	3437.15	0.0578495	0.307452	8.13803	0.32058	0.345667	3224.84	2374.49	3667.01	4128.13	3403.26	3952.35	3455.63	3356.81
WP_259096685.1	cell division protein FtsZ	GTPase activity|0003924||IEA	cytokinesis|0000910||IEA		Essential cell division protein that forms a contractile ring structure (Z ring) at the future cell division site. The regulation of the ring assembly controls the timing and the location of cell division. One of the functions of the FtsZ ring is to recruit other cell division proteins to the septum to produce a new cell wall between the dividing cells. Binds GTP and shows GTPase activity	ko:K03531	ko04112,map04112	-	-	-	ko00000,ko00001,ko02048,ko03036,ko04812	-	FtsZ_C,Tubulin	3427.28	0.128025	0.173199	21.8246	0.00272339	0.00467273	3290.77	4012.72	2573.36	3277.6	2677.97	3325.31	4130.89	3595.24
WP_259094078.1	carboxypeptidase regulatory-like domain-containing protein				PFAM blue (type 1) copper domain protein	-	-	-	-	-	-	-	CarboxypepD_reg	3410.55	0.281494	0.205247	23.2192	0.00156101	0.0028261	3220.8	4178.56	3258.61	2593.34	3386.83	4064.5	2608.65	3914.54
WP_259095398.1	membrane protein insertion efficiency factor YidD				Required for the insertion and or proper folding and or complex formation of integral membrane proteins into the membrane. Involved in integration of membrane proteins that insert both dependently and independently of the Sec translocase complex, as well as at least some lipoproteins. Aids folding of multispanning membrane proteins	ko:K03217	ko02024,ko03060,ko03070,map02024,map03060,map03070	M00335	-	-	ko00000,ko00001,ko00002,ko02044,ko03029	2.A.9	60KD_IMP	3401.58	-0.316803	0.207266	24.1644	0.00106596	0.00199695	3547.2	2689.29	3249.88	4111.34	2722.91	4553.93	3213.82	2847.48
WP_259101420.1	VWA domain-containing protein				PFAM von Willebrand factor type A	ko:K07114	-	-	-	-	ko00000,ko02000	1.A.13.2.2,1.A.13.2.3	VWA	3391.64	-0.128214	0.154083	13.1367	0.0688479	0.0846818	3200.13	3931.82	3623.45	3698.97	2902.67	3482.07	3280.57	2927.76
WP_259095065.1	type IV pilus twitching motility protein PilT	ATP binding|0005524||IEA	type IV pilus-dependent motility|0043107||IEA		Type II/IV secretion system protein	ko:K02669	-	-	-	-	ko00000,ko02035,ko02044	3.A.15.2	T2SSE	3372	-0.266575	0.207312	33.8122	1.86754e-05	5.10744e-05	3088.37	3106.24	4188.45	3965.87	2288.45	3074.11	4608.59	2566.91
WP_259094984.1	glycosyltransferase family 4 protein	glycosyltransferase activity|0016757||IEA		GT4	transferase activity, transferring glycosyl groups	-	-	-	-	-	-	-	Glyco_trans_1_4,Glyco_transf_4,Glycos_transf_1	3370.82	-0.0925507	0.269148	58.2946	3.30323e-10	1.99076e-09	2914.65	1683.56	2103.51	3965.26	2838.89	4678.39	5449.18	2733.38
WP_259091928.1	RecX family transcriptional regulator		regulation of DNA repair|0006282||IEA											3366.09	0.127188	0.162479	154.404	4.82086e-30	1.56786e-28	3072.58	1599.64	2178.23	4908.38	2293.06	3884.75	4883.5	3354.92
WP_259094064.1	ATP-binding protein	ATP binding|0005524||IEA,ATP hydrolysis activity|0016887||IEA			Domain of unknown function DUF87	ko:K06915	-	-	-	-	ko00000	-	DUF87,HAS-barrel	3357.77	0.210476	0.155557	40.0175	1.24911e-06	4.19077e-06	2966.74	2950.78	2666.51	3540.19	2674.04	3435.01	4738.66	3431.91
WP_259092486.1	2-oxoacid:acceptor oxidoreductase family protein	oxidoreductase activity%2C acting on the aldehyde or oxo group of donors|0016903||IEA			oxidoreductase activity, acting on the aldehyde or oxo group of donors, iron-sulfur protein as acceptor	ko:K00171,ko:K00172,ko:K18358,ko:K19072	ko00010,ko00020,ko00360,ko00620,ko00633,ko00640,ko00650,ko00680,ko00720,ko01100,ko01120,ko01130,ko01200,map00010,map00020,map00360,map00620,map00633,map00640,map00650,map00680,map00720,map01100,map01120,map01130,map01200	M00173,M00307,M00374,M00620	R01196,R01199,R02450,R08034	RC00004,RC00250,RC02742,RC02833,RC02860	br01601,ko00000,ko00001,ko00002,ko01000	-	Fer4,POR	3332.14	-0.723726	0.224086	90.2056	1.12263e-16	1.3201e-15	3672.49	1582.73	2251	4675.15	2732.87	3709.25	5249.73	2223.72
WP_018196306.1	CBS domain-containing protein				IMP dehydrogenase activity	-	-	-	-	-	-	-	CBS,GGDEF	3328.65	-0.787499	0.292433	67.8617	3.99159e-12	3.04644e-11	3283.36	4568.14	1709.48	3183.13	1549.99	3147.95	6152.46	1902.06
WP_259099184.1	hypothetical protein													3324.64	-0.521849	0.160988	57.4476	4.87007e-10	2.86335e-09	3468.43	5132.9	3458.63	3129.43	2725.44	3107.01	3004.71	2415.49
WP_259094669.1	GTPase HflX	GTP binding|0005525||IEA	biological_process|0008150||IEA		GTPase that associates with the 50S ribosomal subunit and may have a role during protein synthesis or ribosome biogenesis	ko:K03665	-	-	-	-	ko00000,ko03009	-	GTP-bdg_M,GTP-bdg_N,MMR_HSR1	3319.52	0.243793	0.167846	28.464	0.000181136	0.000407161	3035.32	4359.61	3993.27	3121.81	2735.33	2711.81	3034.56	3594.33
WP_259095933.1	Glu/Leu/Phe/Val dehydrogenase	nucleotide binding|0000166||IEA,oxidoreductase activity|0016491||IEA			Belongs to the Glu Leu Phe Val dehydrogenases family	ko:K00261	ko00220,ko00250,ko00471,ko00910,ko01100,ko01200,ko04217,ko04964,map00220,map00250,map00471,map00910,map01100,map01200,map04217,map04964	M00740	R00243,R00248	RC00006,RC02799	ko00000,ko00001,ko00002,ko01000,ko04147	-	ELFV_dehydrog,ELFV_dehydrog_N	3318.21	0.609626	0.223154	99.84	1.16409e-18	1.64155e-17	2479.2	4956.94	2834.29	2690.68	3825.44	4732.81	1250.94	3783.17
WP_259097397.1	DUF1501 domain-containing protein				Protein of unknown function (DUF1501)	-	-	-	-	-	-	-	DUF1501	3316.23	0.0603482	0.268594	503.192	1.65119e-104	1.98693e-101	1304.17	6748.91	16663.8	851.083	1173.37	1171.14	992.232	1360.03
WP_259098654.1	valine--tRNA ligase	nucleotide binding|0000166||IEA,aminoacyl-tRNA ligase activity|0004812||IEA,valine-tRNA ligase activity|0004832||IEA,ATP binding|0005524||IEA	valyl-tRNA aminoacylation|0006438||IEA		amino acids such as threonine, to avoid such errors, it has a posttransfer editing activity that hydrolyzes mischarged Thr-tRNA(Val) in a tRNA-dependent manner	ko:K01873	ko00970,map00970	M00359,M00360	R03665	RC00055,RC00523	ko00000,ko00001,ko00002,ko01000,ko01007,ko03016	-	Anticodon_1,Val_tRNA-synt_C,tRNA-synt_1	3289.51	0.267776	0.127088	17.4282	0.0148341	0.0213777	2961.3	3873.29	2852.11	3036.44	3447.22	3322.31	3166.04	3564.15
WP_259096974.1	50S ribosomal protein L21	structural constituent of ribosome|0003735||IEA	translation|0006412||IEA		This protein binds to 23S rRNA in the presence of protein L20	ko:K02888	ko03010,map03010	M00178	-	-	br01610,ko00000,ko00001,ko00002,ko03011	-	Ribosomal_L21p	3278.34	-0.202399	0.212237	20.6725	0.00428638	0.00703036	3536.31	4491.72	2738.38	2834.44	3020.46	3648.27	2617.84	3073.36
WP_259095527.1	molecular chaperone DnaK	ATP binding|0005524||IEA,ATP hydrolysis activity|0016887||IEA	protein folding|0006457||IEA		Heat shock 70 kDa protein	ko:K04043	ko03018,ko04212,ko05152,map03018,map04212,map05152	-	-	-	ko00000,ko00001,ko03019,ko03029,ko03110,ko04147	1.A.33.1	HSP70	3271.97	-1.19826	0.330792	39.5836	1.51216e-06	5.03123e-06	4051.22	5566.16	2020.58	2530.82	2410.44	4242.43	2884.18	1765.65
WP_259101372.1	Rne/Rng family ribonuclease	RNA nuclease activity|0004540||IEA	RNA catabolic process|0006401||IEA		Ribonuclease E/G family	ko:K08301	-	-	-	-	ko00000,ko01000,ko03009,ko03019	-	RNase_E_G	3265.19	-0.0329547	0.144135	16.5249	0.0207306	0.0287174	3165.98	3825.31	2777.01	3024.72	2814.37	3463	3644.61	3093.49
WP_259097631.1	citramalate synthase	(R)-citramalate synthase activity|0043714||IEA	isoleucine biosynthetic process|0009097||IEA		Belongs to the alpha-IPM synthase homocitrate synthase family	ko:K01649	ko00290,ko00620,ko01100,ko01110,ko01210,ko01230,map00290,map00620,map01100,map01110,map01210,map01230	M00432	R01213	RC00004,RC00470,RC02754	br01601,ko00000,ko00001,ko00002,ko01000	-	HMGL-like,LeuA_dimer	3265	0.0588638	0.143398	44.5409	1.67892e-07	6.58077e-07	3138.89	4421.59	2292.89	2751.57	2913.81	3366.84	3523.77	3269.56
WP_259093572.1	DUF177 domain-containing protein				metal-binding, possibly nucleic acid-binding protein	ko:K07040	-	-	-	-	ko00000	-	DUF177	3245.8	-0.441771	0.228991	29.3802	0.000123318	0.000284096	3705.14	2887.92	1909.64	3171.99	2902.83	4611.73	3489.5	2727.95
WP_259097523.1	beta-ketoacyl-ACP synthase II	3-oxoacyl-[acyl-carrier-protein] synthase activity|0004315||IEA	fatty acid biosynthetic process|0006633||IEA		Catalyzes the condensation reaction of fatty acid synthesis by the addition to an acyl acceptor of two carbons from malonyl-ACP	ko:K09458	ko00061,ko00780,ko01100,ko01212,map00061,map00780,map01100,map01212	M00083,M00572	R04355,R04726,R04952,R04957,R04960,R04963,R04968,R07762,R10115,R10119	RC00039,RC02728,RC02729,RC02888	ko00000,ko00001,ko00002,ko01000,ko01004	-	Ketoacyl-synt_C,ketoacyl-synt	3232.43	1.09229	0.603304	14.768	0.0390904	0.050525	2163.48	3736.92	4045.18	1078.99	4450.82	2983.09	3465.28	4612.7
WP_259092997.1	3-isopropylmalate dehydratase large subunit	3-isopropylmalate dehydratase activity|0003861||IEA	leucine biosynthetic process|0009098||IEA		Catalyzes the isomerization between 2-isopropylmalate and 3-isopropylmalate, via the formation of 2-isopropylmaleate	ko:K01703	ko00290,ko00660,ko00966,ko01100,ko01110,ko01210,ko01230,map00290,map00660,map00966,map01100,map01110,map01210,map01230	M00432,M00535	R03896,R03898,R03968,R04001,R08620,R08624,R08628,R08634,R08641,R08645,R10170	RC00497,RC00976,RC00977,RC01041,RC01046,RC03072	br01601,ko00000,ko00001,ko00002,ko01000	-	Aconitase	3215.45	0.544066	0.216125	25.8479	0.000536168	0.00107891	2835.61	3663.46	2816.93	2312.48	3838.94	3608.91	2587.83	4134.44
WP_259092381.1	cold-shock protein	transcription antitermination factor activity%2C RNA binding|0001072||IEA,nucleic acid binding|0003676||IEA,RNA binding|0003723||IEA			Cold shock protein	ko:K03704	-	-	-	-	ko00000,ko03000	-	CSD	3206.18	-0.618152	0.336736	23.2239	0.0015581	0.00282508	4619.36	2728.59	1816.85	3610.44	2309.69	4415.75	2377.43	3009.4
WP_259096530.1	hypothetical protein												aspartate 1-decarboxylase activity|0004068||IEA	3203.39	0.192998	0.241919	10.9878	0.139152	0.160697	2766.54	2588.12	3476.47	2745.6	3825.69	3578.93	3781.94	3162.29
WP_259094220.1	HEPN domain-containing protein												acetylglutamate kinase activity|0003991||IEA	3166.35	-0.894149	0.255303	158.374	7.0512e-31	2.44758e-29	3260.47	1322.76	1874.13	4330.83	1436.56	2857.09	7487.46	1754.2
WP_259094054.1	fasciclin domain-containing protein				Secreted and surface protein containing fasciclin-like repeats	-	-	-	-	-	-	-	Fasciclin	3137.36	-0.629262	0.330835	62.4994	4.77475e-11	3.25838e-10	3775.26	6580.34	3085.92	1923.03	1935.09	3513.89	1426.9	2440.57
WP_018195364.1	type IV pilus twitching motility protein PilT	ATP binding|0005524||IEA	type IV pilus-dependent motility|0043107||IEA		Type II/IV secretion system protein	ko:K02669	-	-	-	-	ko00000,ko02035,ko02044	3.A.15.2	T2SSE	3134.19	0.00770304	0.187052	4.90802	0.671187	0.683301	2886.84	3316.44	3057.72	3401.69	2742.57	3223.13	3387.64	2901.45
WP_259100760.1	NADH-quinone oxidoreductase subunit NuoI	oxidoreductase activity%2C acting on NAD(P)H|0016651||IEA			NDH-1 shuttles electrons from NADH, via FMN and iron- sulfur (Fe-S) centers, to quinones in the respiratory chain. The immediate electron acceptor for the enzyme in this species is believed to be ubiquinone. Couples the redox reaction to proton translocation (for every two electrons transferred, four hydrogen ions are translocated across the cytoplasmic membrane), and thus conserves the redox ene…	ko:K00338	ko00190,ko01100,map00190,map01100	M00144	R11945	RC00061	ko00000,ko00001,ko00002,ko01000	3.D.1	Fer4	3126.67	0.0341989	0.195461	4.72198	0.693848	0.705575	3069.03	3279.17	2938	3160.74	3349.89	3434.58	2651.09	3142.33
WP_018196411.1	DUF5666 domain-containing protein													3118.53	0.409391	0.191704	269.969	1.54597e-54	3.28292e-52	1997.58	4739.65	8902.93	1663.21	2515.02	2861.45	1342.38	2652.97
WP_259101860.1	iron-sulfur cluster carrier protein ApbC	ATP binding|0005524||IEA,ATP hydrolysis activity|0016887||IEA,iron-sulfur cluster binding|0051536||IEA	iron-sulfur cluster assembly|0016226||IEA		Binds and transfers iron-sulfur (Fe-S) clusters to target apoproteins. Can hydrolyze ATP	ko:K03593	-	-	-	-	ko00000,ko03029,ko03036	-	FeS_assembly_P,ParA	3113.22	0.23382	0.224722	21.4045	0.0032154	0.00543649	2731.5	3216.15	2710.76	2514.9	2342.19	3421.21	4365.78	3212.12
WP_259093682.1	DNA gyrase subunit A	DNA binding|0003677||IEA,DNA topoisomerase activity|0003916||IEA,DNA topoisomerase type II (double strand cut%2C ATP-hydrolyzing) activity|0003918||IEA,ATP binding|0005524||IEA	DNA metabolic process|0006259||IEA,DNA topological change|0006265||IEA		A type II topoisomerase that negatively supercoils closed circular double-stranded (ds) DNA in an ATP-dependent manner to modulate DNA topology and maintain chromosomes in an underwound state. Negative supercoiling favors strand separation, and DNA replication, transcription, recombination and repair, all of which involve strand separation. Also able to catalyze the interconversion of other topol…	ko:K02469	-	-	-	-	ko00000,ko01000,ko03032,ko03400	-	DNA_gyraseA_C,DNA_topoisoIV	3105.31	0.547803	0.262136	45.8103	9.51751e-08	3.94254e-07	2537.1	4743.26	2725.95	1737.46	4313.43	3151.84	2201.14	3708.55
WP_259099217.1	DNA polymerase III subunit gamma/tau	DNA binding|0003677||IEA,DNA-directed DNA polymerase activity|0003887||IEA,ATP binding|0005524||IEA	DNA replication|0006260||IEA		DNA polymerase III is a complex, multichain enzyme responsible for most of the replicative synthesis in bacteria. This DNA polymerase also exhibits 3' to 5' exonuclease activity	ko:K02343	ko00230,ko00240,ko01100,ko03030,ko03430,ko03440,map00230,map00240,map01100,map03030,map03430,map03440	M00260	R00375,R00376,R00377,R00378	RC02795	ko00000,ko00001,ko00002,ko01000,ko03032,ko03400	-	DNA_pol3_delta2,DNA_pol3_gamma3	3089.89	0.626043	0.233415	31.9161	4.20963e-05	0.000107322	2368.65	4045.99	4107.67	2385.92	3372.26	3068.03	2148.44	3655.54
WP_259099281.1	Flp family type IVb pilin												glycosyltransferase activity|0016757||IEA	3074.9	-0.829883	0.260329	214.808	8.34115e-43	7.52789e-41	3104.88	684.976	1286.61	2927.43	2414.68	3485.5	8132.33	1746.62
WP_259101127.1	50S ribosomal protein L13	structural constituent of ribosome|0003735||IEA	translation|0006412||IEA		This protein is one of the early assembly proteins of the 50S ribosomal subunit, although it is not seen to bind rRNA by itself. It is important during the early stages of 50S assembly	ko:K02871	ko03010,map03010	M00178,M00179	-	-	br01610,ko00000,ko00001,ko00002,ko03011	-	Ribosomal_L13	3065.81	0.146023	0.203599	17.3389	0.0153367	0.0220404	2663.61	3874.08	3792.33	2792.51	3161.05	3144.31	2424.97	2947.52
WP_259101053.1	30S ribosomal protein S7	structural constituent of ribosome|0003735||IEA	translation|0006412||IEA		rRNA binding	ko:K02992	ko03010,map03010	M00178,M00179	-	-	br01610,ko00000,ko00001,ko00002,ko03011	-	Ribosomal_S7	3065.12	0.312092	0.261411	44.7136	1.55433e-07	6.1593e-07	2534.7	5009.46	3683.75	1587.24	3439.14	2831.9	2618.7	3146.92
WP_259099607.1	transketolase				Catalyzes the transfer of a two-carbon ketol group from a ketose donor to an aldose acceptor, via a covalent intermediate with the cofactor thiamine pyrophosphate	-	-	-	-	-	-	-	Transket_pyr,Transketolase_C,Transketolase_N	3055.01	0.419601	0.182137	36.6267	5.51949e-06	1.65909e-05	2892.99	3548.48	2348.56	2546.35	3394.75	3537.81	2180.19	3868.74
WP_259101094.1	preprotein translocase subunit SecY	protein-transporting ATPase activity|0015450||IEA	protein transport by the Sec complex|0043952||IEA		protein transport	ko:K03076	ko02024,ko03060,ko03070,map02024,map03060,map03070	M00335	-	-	ko00000,ko00001,ko00002,ko02044	3.A.5	SecY	3048.87	0.163464	0.212306	62.2728	5.3009e-11	3.5702e-10	2497.63	4849.98	4261.63	2428.11	3017.86	3152.97	1779.64	2797.07
WP_259096008.1	FGGY family carbohydrate kinase	phosphotransferase activity%2C alcohol group as acceptor|0016773||IEA	carbohydrate metabolic process|0005975||IEA		xylulokinase activity	ko:K00848,ko:K00851,ko:K00854	ko00030,ko00040,ko00051,ko01100,ko01110,ko01120,ko01130,ko01200,map00030,map00040,map00051,map01100,map01110,map01120,map01130,map01200	M00014	R01639,R01737,R01902,R03014	RC00002,RC00017,RC00538	ko00000,ko00001,ko00002,ko01000	-	FGGY_C,FGGY_N	3038.38	0.86387	0.320461	26.7937	0.000363005	0.000761003	2244.06	4090.82	3798.21	1771.3	3716.56	2749.6	2331.89	4083.94
WP_259099016.1	cytochrome c family protein													3024.14	0.925026	0.392961	8.53101	0.288102	0.313646	1862.72	2778.26	3861.15	2727.92	3610.69	3278.65	3011.5	3536.76
WP_259095308.1	nitrite/sulfite reductase	heme binding|0020037||IEA,metal ion binding|0046872||IEA,sulfite reductase (ferredoxin) activity|0050311||IEA,4 iron%2C 4 sulfur cluster binding|0051539||IEA			Component of the sulfite reductase complex that catalyzes the 6-electron reduction of sulfite to sulfide. This is one of several activities required for the biosynthesis of L- cysteine from sulfate	ko:K00366,ko:K00381	ko00910,ko00920,ko01100,ko01120,map00910,map00920,map01100,map01120	M00176,M00531	R00790,R00858	RC00065,RC00176	ko00000,ko00001,ko00002,ko01000	-	NIR_SIR,NIR_SIR_ferr	3020.93	1.51511	0.787395	29.774	0.000104462	0.000244242	2060.48	2997.22	2497.88	538.917	6247.12	4122.5	715.311	5889.08
WP_026307571.1	50S ribosomal protein L7/L12	structural constituent of ribosome|0003735||IEA	translation|0006412||IEA		Forms part of the ribosomal stalk which helps the ribosome interact with GTP-bound translation factors. Is thus essential for accurate translation	ko:K02935	ko03010,map03010	M00178	-	-	br01610,ko00000,ko00001,ko00002,ko03011	-	Ribosomal_L12,Ribosomal_L12_N	3017.93	1.11135	0.243657	76.2427	8.01866e-14	7.30994e-13	2139.01	5079.36	1800.14	1699.33	2693.55	2710.34	2886.16	4621.46
WP_259101430.1	HEAT repeat domain-containing protein													3001.63	-0.572814	0.205874	19.7402	0.00615904	0.00973473	3680.42	3120.77	2825.47	3718.2	2174.36	2873.14	2811.35	2474.87
WP_259092343.1	transcription-repair coupling factor	double-stranded DNA binding|0003690||IEA,protein binding|0005515||IEA,ATP binding|0005524||IEA,ATP hydrolysis activity|0016887||IEA	DNA repair|0006281||IEA		Couples transcription and DNA repair by recognizing RNA polymerase (RNAP) stalled at DNA lesions. Mediates ATP-dependent release of RNAP and its truncated transcript from the DNA, and recruitment of nucleotide excision repair machinery to the damaged site	ko:K03723	ko03420,map03420	-	-	-	ko00000,ko00001,ko01000,ko03400	-	CarD_CdnL_TRCF,DEAD,Helicase_C,TRCF	2977.92	0.238174	0.154424	39.018	1.93909e-06	6.3121e-06	2539.3	2148.18	3003.1	3604.56	3027.26	2764.17	3766.49	2995.17
WP_259099578.1	nitrite/sulfite reductase	heme binding|0020037||IEA,metal ion binding|0046872||IEA,sulfite reductase (ferredoxin) activity|0050311||IEA,4 iron%2C 4 sulfur cluster binding|0051539||IEA			Component of the sulfite reductase complex that catalyzes the 6-electron reduction of sulfite to sulfide. This is one of several activities required for the biosynthesis of L- cysteine from sulfate	ko:K00366,ko:K00381	ko00910,ko00920,ko01100,ko01120,map00910,map00920,map01100,map01120	M00176,M00531	R00790,R00858	RC00065,RC00176	ko00000,ko00001,ko00002,ko01000	-	NIR_SIR,NIR_SIR_ferr	2921.44	0.868261	0.79968	30.4607	7.81482e-05	0.000187452	2434.08	3291.4	2704.33	530.169	6688.73	3980.84	482.14	4443.19
WP_259095231.1	Hsp20/alpha crystallin family protein				Belongs to the small heat shock protein (HSP20) family	ko:K13993	ko04141,map04141	-	-	-	ko00000,ko00001,ko03110	-	HSP20	2874.22	-2.15299	0.787904	27.1231	0.000316695	0.000672511	4011.87	1776.56	663.154	5207.01	694.456	5497.27	2777.77	902.072
WP_259092439.1	GntR family transcriptional regulator				PFAM periplasmic binding protein LacI transcriptional regulator	ko:K02529	-	-	-	-	ko00000,ko03000	-	LacI,Peripla_BP_3	2872.77	0.175158	0.33889	241.664	1.64535e-48	2.1999e-46	5490.93	512.594	1417.5	1415.09	5864.61	352.175	2241.92	6199.5
WP_259093046.1	peptidylprolyl isomerase	peptidyl-prolyl cis-trans isomerase activity|0003755||IEA			peptidyl-prolyl isomerase	ko:K03769,ko:K07533	-	-	-	-	ko00000,ko01000,ko03110	-	Cu_amine_oxidN1,Rotamase_3,SurA_N_3	2867.22	0.0248365	0.151107	17.0702	0.0169491	0.0240743	2935.61	2568.86	3431.94	2638.64	3144.39	3152.89	2359.67	2986.37
WP_259095778.1	hypothetical protein													2815.98	-0.889045	0.275827	54.1303	2.21632e-09	1.18708e-08	3155.6	1711.45	2023.47	4268.5	1749.33	3403.17	3892.55	1704.05
WP_259102400.1	DUF499 domain-containing protein				Protein of unknown function (DUF499)	-	-	-	-	-	-	-	DUF499	2814.1	-0.0935548	0.194156	106.805	4.22089e-20	6.68308e-19	2372.1	1981.17	1793.12	3715.02	2334.27	2264.6	5329.4	2222.85
WP_259095513.1	UvrD-helicase domain-containing protein	ATP binding|0005524||IEA											GTP binding|0005525||IEA,ferrous iron transmembrane transporter activity|0015093||IEA	2790.73	0.255671	0.203355	4.28221	0.746759	0.755126	2387.14	3047.65	2668.14	2639.24	2994.65	2817.57	2948.78	2849.77
WP_259093779.1	ATP-dependent sacrificial sulfur transferase LarE	sulfurtransferase activity|0016783||IEA			tRNA processing	ko:K06864	-	-	-	-	ko00000	-	Asn_synthase,NAD_synthase	2782.51	0.244402	0.23418	16.9289	0.0178601	0.0252151	2797.12	2553.2	2458.28	3069.8	2560.87	3393.09	1932.3	3313.46
WP_259102049.1	aspartate--tRNA ligase	nucleotide binding|0000166||IEA,aminoacyl-tRNA ligase activity|0004812||IEA,ATP binding|0005524||IEA,ligase activity|0016874||IEA	tRNA aminoacylation for protein translation|0006418||IEA		L-aspartate is first activated by ATP to form Asp-AMP and then transferred to the acceptor end of tRNA(Asp	ko:K01876	ko00970,map00970	M00359,M00360	R05577	RC00055,RC00523	ko00000,ko00001,ko00002,ko01000,ko01007,ko03016,ko03029	-	GAD,tRNA-synt_2,tRNA_anti-codon	2774.29	0.290874	0.212995	12.9538	0.0732422	0.0894769	2410.44	2235.02	2364.74	2748.6	3089.08	2944.02	3422.24	2948.63
WP_259096812.1	ArsR family transcriptional regulator	DNA-binding transcription factor activity|0003700||IEA	regulation of DNA-templated transcription|0006355||IEA										molecular_function|0003674||IEA	2771.51	-0.0895988	0.286534	11.0871	0.134866	0.156392	2820.64	2977.75	2216.94	2861	1704.58	3116.17	3283.54	2650.92
WP_259092040.1	thiamine pyrophosphate-dependent enzyme	catalytic activity|0003824||IEA,thiamine pyrophosphate binding|0030976||IEA			Catalyzes the ferredoxin-dependent oxidative decarboxylation of arylpyruvates	ko:K00179	-	-	-	-	br01601,ko00000,ko01000	-	Fer4,POR_N,TPP_enzyme_C	2751.35	0.529323	0.400728	15.5831	0.0292107	0.0388686	2180.75	2561.68	3661.28	1498.46	4132.27	3168.15	2424.56	3147.25
WP_259095729.1	R3H domain-containing nucleic acid-binding protein	nucleic acid binding|0003676||IEA			ATPases associated with a variety of cellular activities	-	-	-	-	-	-	-	AAA,AAA_30,R3H	2740.32	-0.202502	0.154529	29.9628	9.64641e-05	0.000226863	2876.24	2267.52	2147.46	3511.44	2613.76	2607.1	3159.85	2499.42
WP_259094902.1	DNA topoisomerase (ATP-hydrolyzing) subunit B	DNA topoisomerase type II (double strand cut%2C ATP-hydrolyzing) activity|0003918||IEA	DNA topological change|0006265||IEA		A type II topoisomerase that negatively supercoils closed circular double-stranded (ds) DNA in an ATP-dependent manner to modulate DNA topology and maintain chromosomes in an underwound state. Negative supercoiling favors strand separation, and DNA replication, transcription, recombination and repair, all of which involve strand separation. Also able to catalyze the interconversion of other topol…	ko:K02470	-	-	-	-	ko00000,ko01000,ko03032,ko03400	-	DNA_gyraseB,DNA_gyraseB_C,HATPase_c,Toprim	2738.11	0.880442	0.198877	45.0494	1.33772e-07	5.36575e-07	1766.51	4087.6	2463.68	2261.08	2727.75	2646.6	2604.58	3252.16
WP_259100692.1	nodulation protein NfeD				NfeD-like C-terminal, partner-binding	ko:K07403	-	-	-	-	ko00000	-	CLP_protease,NfeD	2737.03	-0.146141	0.167273	9.70457	0.205942	0.229744	3094.61	2679.45	2555.56	2866.88	2450.81	2991.78	2305.1	2796.17
WP_259101955.1	uroporphyrinogen decarboxylase family protein	uroporphyrinogen decarboxylase activity|0004853||IEA	porphyrin-containing compound biosynthetic process|0006779||IEA										glutamate 5-kinase activity|0004349||IEA	2734.76	0.1721	0.161534	21.4246	0.00319003	0.00539645	2632.8	2516.56	2411.96	3462.31	2477.54	2972.13	2245.1	2966.32
WP_259099181.1	hypothetical protein													2728.37	-0.566566	0.17307	48.2471	3.18564e-08	1.44112e-07	2796.82	3819.04	3148.68	2676.69	1946.53	2956.29	2474.03	1888.36
WP_259097111.1	alanine--tRNA ligase	alanine-tRNA ligase activity|0004813||IEA	alanyl-tRNA aminoacylation|0006419||IEA		Catalyzes the attachment of alanine to tRNA(Ala) in a two-step reaction alanine is first activated by ATP to form Ala- AMP and then transferred to the acceptor end of tRNA(Ala). Also edits incorrectly charged Ser-tRNA(Ala) and Gly-tRNA(Ala) via its editing domain	ko:K01872	ko00970,map00970	M00359,M00360	R03038	RC00055,RC00523	ko00000,ko00001,ko00002,ko01000,ko01007,ko03016	-	DHHA1,tRNA-synt_2c,tRNA_SAD	2720.63	0.339873	0.120931	26.6915	0.000378674	0.000789269	2294.97	3363.47	2432.78	2547.25	2797.52	2713.95	2641.79	2903
WP_259100490.1	DUF2357 domain-containing protein				-	ko:K09124	-	-	-	-	ko00000	-	DUF2357,PDDEXK_7	2717.92	0.45908	0.18169	46.3197	7.57502e-08	3.19088e-07	2122.11	2677.07	3623.98	3322.94	2442.31	3115.42	1732.57	2917.1
WP_259092489.1	single-stranded-DNA-specific exonuclease RecJ	single-stranded DNA exodeoxyribonuclease activity|0008297||IEA	DNA recombination|0006310||IEA		TIGRFAM single-stranded-DNA-specific exonuclease RecJ	ko:K07462	ko03410,ko03430,ko03440,map03410,map03430,map03440	-	-	-	ko00000,ko00001,ko01000,ko03400	-	DHH,DHHA1,Helicase_C	2716.94	0.160958	0.166069	8.86939	0.26217	0.287233	2711.75	2752.3	2822.83	2658.61	3029.64	2632.77	2235.09	3032.02
WP_020249974.1	prepilin-type N-terminal cleavage/methylation domain-containing protein				cell adhesion	ko:K02650	ko02020,map02020	-	-	-	ko00000,ko00001,ko02035,ko02044	3.A.15.2	N_methyl,SBP_bac_10	2707.93	-0.157468	0.211305	52.1895	5.35748e-09	2.73171e-08	2317	4458.23	2978.98	2463.47	1999.17	3195.25	2028.08	2077.36
WP_020249927.1	NADH-quinone oxidoreductase subunit B				NDH-1 shuttles electrons from NADH, via FMN and iron- sulfur (Fe-S) centers, to quinones in the respiratory chain. The immediate electron acceptor for the enzyme in this species is believed to be a menaquinone. Couples the redox reaction to proton translocation (for every two electrons transferred, four hydrogen ions are translocated across the cytoplasmic membrane), and thus conserves the redox …	ko:K00331	ko00190,ko01100,map00190,map01100	M00144	R11945	RC00061	ko00000,ko00001,ko00002,ko01000	3.D.1	Oxidored_q6	2707.64	0.166777	0.150616	37.7024	3.45161e-06	1.07047e-05	2555.08	2699.62	2612.38	2199.69	1911.21	2997.02	3520.94	2867.91
WP_259094649.1	excinuclease ABC subunit UvrA	excinuclease ABC activity|0009381||IEA	nucleotide-excision repair|0006289||IEA		The UvrABC repair system catalyzes the recognition and processing of DNA lesions. UvrA is an ATPase and a DNA-binding protein. A damage recognition complex composed of 2 UvrA and 2 UvrB subunits scans DNA for abnormalities. When the presence of a lesion has been verified by UvrB, the UvrA molecules dissociate	ko:K03701	ko03420,map03420	-	-	-	ko00000,ko00001,ko03400	-	ABC_tran	2700.05	0.142054	0.147385	38.3699	2.57688e-06	8.18884e-06	2283.34	2312.84	2935.76	3757.18	2492.49	2422.15	2886.64	2519.41
WP_259094198.1	OstA-like protein												nucleic acid binding|0003676||IEA,endonuclease activity|0004519||IEA	2689.24	-0.701733	0.205347	52.6588	4.329e-09	2.23892e-08	3435.52	1559.47	2724.66	2365.15	2321.66	3592.01	3292.79	2111.92
WP_259100627.1	DUF1559 domain-containing protein				Required for transformation and DNA binding	ko:K02245,ko:K02456	ko03070,ko05111,map03070,map05111	M00331,M00429	-	-	ko00000,ko00001,ko00002,ko02044	3.A.15	N_methyl	2669.57	-0.372623	0.186469	351.994	4.61124e-72	3.32932e-69	4453.16	631.549	526.336	2743.06	2293.01	3800.64	2629.42	3439.43
WP_259101165.1	hypothetical protein													2668.47	-0.772248	0.221105	43.8915	2.24303e-07	8.5868e-07	3123.28	2330.86	3018.01	3909.94	2005.28	3101.83	1925.44	1828.55
WP_259092713.1	phytanoyl-CoA dioxygenase family protein				PFAM Phytanoyl-CoA dioxygenase (PhyH)	-	-	-	-	-	-	-	PhyH	2655.41	0.0970616	0.284526	73.2189	3.29586e-13	2.867e-12	1905.07	4810.21	5029.22	1962.72	2081.75	2659.89	1356.95	2037.5
WP_259093499.1	hypothetical protein				-	-	-	-	-	-	-	-	-	2633.32	-0.14671	0.196806	21.7138	0.0028456	0.00486623	2479.63	2852.6	2746.4	2926.24	2091.97	2133.81	3453.82	2239.33
WP_302898689.1	RtcB family protein	RNA ligase activity|0008452||IEA	RNA processing|0006396||IEA		tRNA-splicing ligase RtcB	ko:K14415	-	-	-	-	ko00000,ko01000,ko03016	-	Intein_splicing,LAGLIDADG_3,RtcB	2626.89	-0.0364504	0.16346	44.5427	1.67752e-07	6.58077e-07	2361.9	3634.12	2067.89	2407.69	2225.73	2331.5	3364.13	2302.11
WP_259096311.1	type II secretion system protein												protein kinase activity|0004672||IEA	2609.69	-0.181639	0.187075	32.4465	3.35608e-05	8.69737e-05	2694.5	2032.96	2573.12	3674.82	2300.48	3008.55	2102.27	2375.54
WP_259094541.1	serine hydroxymethyltransferase	glycine hydroxymethyltransferase activity|0004372||IEA,zinc ion binding|0008270||IEA,pyridoxal phosphate binding|0030170||IEA,serine binding|0070905||IEA	glycine biosynthetic process from serine|0019264||IEA		Catalyzes the reversible interconversion of serine and glycine with tetrahydrofolate (THF) serving as the one-carbon carrier. This reaction serves as the major source of one-carbon groups required for the biosynthesis of purines, thymidylate, methionine, and other important biomolecules. Also exhibits THF- independent aldolase activity toward beta-hydroxyamino acids, producing glycine and aldehyd…	ko:K00600	ko00260,ko00460,ko00630,ko00670,ko00680,ko01100,ko01110,ko01120,ko01130,ko01200,ko01230,ko01523,map00260,map00460,map00630,map00670,map00680,map01100,map01110,map01120,map01130,map01200,map01230,map01523	M00140,M00141,M00346,M00532	R00945,R09099	RC00022,RC00112,RC01583,RC02958	ko00000,ko00001,ko00002,ko01000	-	SHMT	2609.49	0.172591	0.249555	4.59704	0.709002	0.719769	2474.85	2601.13	2714.85	2113.05	2870.88	2902.36	2531.64	2789.45
WP_259099723.1	nickel-dependent lactate racemase	lactate racemase activity|0050043||IEA			conserved protein (DUF2088)	-	-	-	-	-	-	-	DUF2088	2608.43	-0.0369872	0.191644	4.39217	0.73366	0.742921	2437.43	2977.29	2662.73	2629.28	2385.42	2721.04	2622.51	2375.53
WP_259096392.1	hypothetical protein			GH129									metalloendopeptidase activity|0004222||IEA	2601.94	0.114087	0.13109	18.1108	0.0114801	0.0169641	2512.59	2851.39	2814.07	2822.66	2715.4	2401.94	2086.33	2719.69
WP_018195875.1	Gfo/Idh/MocA family oxidoreductase	oxidoreductase activity|0016491||IEA,oxidoreductase activity%2C acting on NAD(P)H|0016651||IEA		GH109	domain, Protein	ko:K02451,ko:K03086,ko:K03615,ko:K03969,ko:K07268,ko:K08884,ko:K15842	ko05120,map05120	M00331,M00564	-	-	ko00000,ko00001,ko00002,ko01000,ko01001,ko02044,ko03021	9.B.42	DUF4139,DUF4140,PspA_IM30	2595.06	0.446602	0.283252	15.1641	0.0339522	0.0445052	2045.55	3011.17	2880.46	1806.02	3529.37	2786.54	2320.6	2787.32
WP_259096328.1	S9 family peptidase				peptidase S9 prolyl oligopeptidase active site	ko:K01303	-	-	-	-	ko00000,ko01000,ko01002	-	PD40,Peptidase_S9	2587.7	0.400755	0.26433	19.3461	0.00716956	0.0111513	2086	1959.49	2367.55	2140.61	3065.79	2709.68	3704.46	2753.96
WP_259100976.1	DUF1559 domain-containing protein				general secretion pathway protein	ko:K02456,ko:K02679	ko03070,ko05111,map03070,map05111	M00331	-	-	ko00000,ko00001,ko00002,ko02044	3.A.15	N_methyl,SBP_bac_10	2586.71	-0.433341	0.214659	77.297	4.89418e-14	4.5419e-13	2565.47	4424.82	3389.72	1843.47	1350.77	2201.7	2873.86	1899.59
WP_259100814.1	neutral/alkaline non-lysosomal ceramidase N-terminal domain-containing protein													2574.07	0.230342	0.312512	5.08623	0.64944	0.663407	2386.32	2380.9	2683.53	1954.46	2920.48	2923.53	2696.07	2799.2
WP_259095072.1	S9 family peptidase				X-Pro dipeptidyl-peptidase (S15 family)	-	-	-	-	-	-	-	PD40,Peptidase_S9,Peptidase_S9_N	2566.85	-0.460322	0.240712	11.9498	0.102222	0.121469	3222.84	2539.78	2504.97	2913.43	1856.03	2218.48	2678.77	2342.97
WP_259092453.1	ABC transporter transmembrane domain-containing protein	ATP binding|0005524||IEA,ATPase-coupled transmembrane transporter activity|0042626||IEA	transmembrane transport|0055085||IEA		ABC transporter	ko:K06147	-	-	-	-	ko00000,ko02000	3.A.1.106,3.A.1.109,3.A.1.21	ABC_membrane,ABC_tran	2560.93	-0.351476	0.169814	33.9374	1.76954e-05	4.85412e-05	2868.41	1925.07	2497.77	3457.67	2070.24	2720.01	2515.53	2248.13
WP_259095129.1	Gfo/Idh/MocA family oxidoreductase	oxidoreductase activity|0016491||IEA,oxidoreductase activity%2C acting on NAD(P)H|0016651||IEA		GH179	Oxidoreductase family, NAD-binding Rossmann fold	-	-	-	-	-	-	-	GFO_IDH_MocA	2546.7	0.215997	0.214478	29.6962	0.00010795	0.000251744	2661.74	1650.03	2785.34	2832.39	2870.37	2802.08	1867.43	3091.67
WP_259092849.1	DUF721 domain-containing protein													2527.21	-0.729009	0.205106	52.0658	5.66676e-09	2.87317e-08	3176.76	3350.6	2081.84	3378.01	1513.54	2160.95	2152.62	1917.01
WP_259100755.1	DUF362 domain-containing protein				4fe-4S ferredoxin, iron-sulfur binding domain protein	-	-	-	-	-	-	-	DUF2088,DUF362	2526.99	0.474797	0.27685	8.13385	0.320939	0.345848	2092.42	2171.87	2573.46	2371.61	3264.21	2813.11	2282.77	2907.68
WP_259096116.1	isoleucine--tRNA ligase	isoleucine-tRNA ligase activity|0004822||IEA	isoleucyl-tRNA aminoacylation|0006428||IEA		amino acids such as valine, to avoid such errors it has two additional distinct tRNA(Ile)-dependent editing activities. One activity is designated as 'pretransfer' editing and involves the hydrolysis of activated Val-AMP. The other activity is designated 'posttransfer' editing and involves deacylation of mischarged Val-tRNA(Ile)	ko:K01870	ko00970,map00970	M00359,M00360	R03656	RC00055,RC00523	ko00000,ko00001,ko00002,ko01000,ko01007,ko03016	-	Anticodon_1,tRNA-synt_1,zf-FPG_IleRS	2524.99	0.0452532	0.126969	52.2266	5.26792e-09	2.69365e-08	2393.66	3569.2	2157.56	2019.01	2600.04	2466.82	2426	2470.16
WP_259095130.1	PmoA family protein				Methane oxygenase PmoA	-	-	-	-	-	-	-	PmoA	2516.32	0.259714	0.192692	43.6976	2.44536e-07	9.28259e-07	2314.54	3426.61	2897.94	2420.15	2304.72	2589.29	1462.73	2771.22
WP_259093567.1	ADP-ribosylglycohydrolase family protein	hydrolase activity%2C hydrolyzing N-glycosyl compounds|0016799||IEA,metal ion binding|0046872||IEA			ADP-ribosylglycohydrolase	-	-	-	-	-	-	-	ADP_ribosyl_GH	2507.99	0.521091	0.294477	15.2124	0.0333709	0.0438388	2004.76	2536.54	2663.46	1582.89	3271.83	2776.91	2657.44	2876.56
WP_259098115.1	ABC transporter ATP-binding protein	ATP binding|0005524||IEA,ATP hydrolysis activity|0016887||IEA,ATPase-coupled transmembrane transporter activity|0042626||IEA,ABC-type transporter activity|0140359||IEA			PFAM ABC transporter related	ko:K02003	-	M00258	-	-	ko00000,ko00002,ko02000	3.A.1	ABC_tran	2496.41	0.429479	0.184964	22.4759	0.00210216	0.00369285	1995.93	3251.44	2323.3	1975.99	2606.93	2556.57	2553.28	2686.94
WP_259101160.1	hypothetical protein				-	-	-	-	-	-	-	-	-	2495.27	-0.432906	0.371149	43.8886	2.24586e-07	8.5885e-07	2949.26	4830.28	1430.41	1687.77	1911.95	3227.62	1190.63	2184.86
WP_259095136.1	HEAT repeat domain-containing protein												protein binding|0005515||IEA	2489.58	0.0539262	0.16741	8.34497	0.303159	0.328256	2418.06	2761.35	2712.02	2732.76	2093.4	2370.61	2260.04	2510.46
WP_259100066.1	ThuA domain-containing protein				Trehalose utilisation	ko:K09992	-	-	-	-	ko00000	-	GSDH,ThuA	2481.77	0.00431774	0.147047	21.2839	0.00337193	0.00566434	2269.27	2886.97	2575.03	2813.42	2299.55	2703.51	2000.83	2275.92
WP_259094988.1	radical SAM protein	catalytic activity|0003824||IEA,4 iron%2C 4 sulfur cluster binding|0051539||IEA,S-adenosyl-L-methionine binding|1904047||IEA			PFAM Radical SAM superfamily	-	-	-	-	-	-	-	Fer4_12,Fer4_14,Radical_SAM	2481.67	-0.456733	0.237405	80.9083	8.99101e-15	8.81998e-14	2082.55	5058.26	3127.38	1778.52	2037.31	2260.62	2058.56	1517.27
WP_259092420.1	ParB/RepB/Spo0J family partition protein				ParB-like nuclease domain	ko:K03497	-	-	-	-	ko00000,ko03000,ko03036,ko04812	-	ParBc	2473.67	-0.278764	0.183881	25.3622	0.000654364	0.00128803	2242.99	3179.23	2259.99	2310.77	2202.6	2713	2870.18	1849.01
WP_018196544.1	phosphoadenylyl-sulfate reductase	catalytic activity|0003824||IEA,phosphoadenylyl-sulfate reductase (thioredoxin) activity|0004604||IEA	sulfate assimilation%2C phosphoadenylyl sulfate reduction by phosphoadenylyl-sulfate reductase (thioredoxin)|0019379||IEA		Belongs to the PAPS reductase family. CysH subfamily	ko:K00390	ko00920,ko01100,ko01120,map00920,map01100,map01120	M00176	R02021	RC00007,RC02862	ko00000,ko00001,ko00002,ko01000	-	PAPS_reduct	2469.14	0.884743	0.858608	22.4176	0.00215159	0.003776	2037.6	2886.84	2583.88	451.755	5240.27	3178.05	574.595	3762.12
WP_259096378.1	aspartate-semialdehyde dehydrogenase	aspartate-semialdehyde dehydrogenase activity|0004073||IEA,oxidoreductase activity%2C acting on the aldehyde or oxo group of donors%2C NAD or NADP as acceptor|0016620||IEA,NAD binding|0051287||IEA	amino acid biosynthetic process|0008652||IEA		Catalyzes the NADPH-dependent formation of L-aspartate- semialdehyde (L-ASA) by the reductive dephosphorylation of L- aspartyl-4-phosphate	ko:K00133	ko00260,ko00261,ko00270,ko00300,ko01100,ko01110,ko01120,ko01130,ko01210,ko01230,map00260,map00261,map00270,map00300,map01100,map01110,map01120,map01130,map01210,map01230	M00016,M00017,M00018,M00033,M00525,M00526,M00527	R02291	RC00684	ko00000,ko00001,ko00002,ko01000	-	Semialdhyde_dh,Semialdhyde_dhC	2466.25	0.534592	0.165159	111.046	5.5719e-21	9.48799e-20	2067.33	4158.28	1982.03	1448.14	2486.39	2545.88	1893.38	2993.89
WP_259092719.1	dTDP-glucose 4%2C6-dehydratase	dTDP-glucose 4%2C6-dehydratase activity|0008460||IEA	O antigen biosynthetic process|0009243||IEA,dTDP-rhamnose biosynthetic process|0019305||IEA		Belongs to the NAD(P)-dependent epimerase dehydratase family. dTDP-glucose dehydratase subfamily	ko:K01710,ko:K12450	ko00520,ko00521,ko00523,ko00525,ko01055,ko01130,map00520,map00521,map00523,map00525,map01055,map01130	M00793	R00293,R06513	RC00402	ko00000,ko00001,ko00002,ko01000	-	GDP_Man_Dehyd	2463.54	-1.02784	0.233353	163.856	4.94668e-32	1.86016e-30	2967.94	846.944	1059.79	3742.29	1690.12	2932.97	4287.01	1455.53
WP_259096895.1	UXX-star (seleno)protein family 1				Has a glutathione-disulfide oxidoreductase activity in the presence of NADPH and glutathione reductase. Reduces low molecular weight disulfides and proteins	ko:K03676	-	-	-	-	ko00000,ko03110	-	Glutaredoxin	2461.52	0.793207	0.30185	51.3082	7.99013e-09	3.96759e-08	1872.27	3299.97	1199.59	1320.27	1581.63	3010.71	3449.52	3244.29
WP_259094234.1	SpoVR family protein				PFAM SpoVR family protein	ko:K06415	-	-	-	-	ko00000	-	SpoVR	2443.58	-0.23955	0.129315	100.975	6.78413e-19	9.6042e-18	2293.46	1759.56	2171.01	3435.82	1894.28	2609.01	3169.03	1942.51
WP_259101772.1	DUF4058 family protein				Protein of unknown function (DUF4058)	-	-	-	-	-	-	-	DUF4058	2436.42	-0.933065	0.213731	83.9282	2.172e-15	2.30616e-14	2969.77	1399.3	2304.06	4217.2	1726.06	2355.47	2683.19	1555.41
WP_259100110.1	trigger factor	peptidyl-prolyl cis-trans isomerase activity|0003755||IEA,unfolded protein binding|0051082||IEA	'de novo' cotranslational protein folding|0051083||IEA											2435.02	0.321952	0.235809	11.0566	0.136169	0.157606	2220.67	2638.99	2133.24	1805.22	2849.13	2611.13	2483.6	2775.64
WP_259092985.1	UDP-N-acetylglucosamine 2-epimerase (non-hydrolyzing)	UDP-N-acetylglucosamine 2-epimerase activity|0008761||IEA	lipopolysaccharide biosynthetic process|0009103||IEA		Belongs to the UDP-N-acetylglucosamine 2-epimerase family	ko:K01791	ko00520,ko01100,ko05111,map00520,map01100,map05111	M00362	R00420	RC00290	ko00000,ko00001,ko00002,ko01000,ko01005	-	Epimerase_2	2423.71	0.0373804	0.194231	122.007	2.92493e-23	5.8661e-22	2265.25	969.706	1455.95	3190.09	2247.24	2837.26	3718.66	2324.15
WP_259095343.1	MBL fold metallo-hydrolase				Rhodanese Homology Domain	-	-	-	-	-	-	-	Lactamase_B,Rhodanese	2421.23	-1.29913	0.378975	64.9838	1.51516e-11	1.08526e-10	2545.47	4411.27	4580	3075.89	992.432	1660.01	1313.31	1034.75
WP_259093366.1	hypothetical protein												pyruvate kinase activity|0004743||IEA	2417.76	0.23962	0.191994	30.4558	7.83116e-05	0.000187719	2205.12	3285.88	2665.34	1913.13	2278.48	2645.12	1781.97	2603.12
WP_259094969.1	tRNA 2-thiouridine(34) synthase MnmA	transferase activity|0016740||IEA,sulfurtransferase activity|0016783||IEA	tRNA processing|0008033||IEA		Catalyzes the 2-thiolation of uridine at the wobble position (U34) of tRNA, leading to the formation of s(2)U34	ko:K00566	ko04122,map04122	-	R08700	RC02313,RC02315	ko00000,ko00001,ko01000,ko03016	-	tRNA_Me_trans	2415.23	0.0133545	0.153259	72.0391	5.7148e-13	4.77556e-12	2258.51	1380.05	2263.84	2943.72	2288.94	2622.48	3192.78	2278.99
WP_302898706.1	type IV pilus twitching motility protein PilT	ATP binding|0005524||IEA	type IV pilus-dependent motility|0043107||IEA		Type II/IV secretion system protein	ko:K02669	-	-	-	-	ko00000,ko02035,ko02044	3.A.15.2	T2SSE	2406.5	-0.350638	0.191935	51.889	6.14014e-09	3.08717e-08	2147.34	2587.36	3010.96	2611.91	1591.99	2048.55	3500.06	1683.82
WP_259100689.1	hypothetical protein												nucleobase transmembrane transporter activity|0015205||IEA	2401.84	0.500743	0.156841	70.5058	1.16754e-12	9.42911e-12	1979.09	1987.06	1661.21	2376.7	2079.34	2247.34	3729.79	2799.78
WP_259095827.1	pitrilysin family protein	metal ion binding|0046872||IEA			Insulinase (Peptidase family M16)	ko:K07263	-	-	-	-	ko00000,ko01000,ko01002	-	Peptidase_M16,Peptidase_M16_C	2387.67	0.215159	0.233714	7.31098	0.397234	0.420656	2165.95	2417.13	1918.76	2127.8	2633.06	2387.94	2862.21	2513.97
WP_259097726.1	uroporphyrinogen decarboxylase family protein	uroporphyrinogen decarboxylase activity|0004853||IEA	porphyrin-containing compound biosynthetic process|0006779||IEA											2381.55	0.525002	0.288269	5.79984	0.563306	0.581862	1920.26	2287.99	2944.47	2181.65	2587.68	2245.22	2378.54	2762.92
WP_259093039.1	30S ribosomal protein S6	structural constituent of ribosome|0003735||IEA	translation|0006412||IEA		Binds together with S18 to 16S ribosomal RNA	ko:K02990	ko03010,map03010	M00178	-	-	br01610,ko00000,ko00001,ko00002,ko03011,ko03029	-	Ribosomal_S6	2379.74	-0.0200131	0.157937	82.6911	3.88818e-15	4.01038e-14	2360.26	1852.28	1472.4	2689.3	1679.01	2450.04	3671.33	2327.31
WP_259095349.1	sulfurtransferase	sulfurtransferase activity|0016783||IEA												2370.99	-0.238582	0.210878	118.887	1.30629e-22	2.49507e-21	2160.24	3501.05	4775.13	2153.39	1823.9	2331.81	1010.27	1831.18
WP_259101025.1	N-6 DNA methylase	DNA binding|0003677||IEA,N-methyltransferase activity|0008170||IEA	DNA methylation|0006306||IEA										transaminase activity|0008483||IEA	2365.84	0.284731	0.266445	14.1464	0.0486373	0.0617155	1725.93	2073.74	2835.88	2614.82	2593.92	2148.72	3064.12	2102.31
WP_259099666.1	isocitrate dehydrogenase (NADP(+))	isocitrate dehydrogenase (NADP+) activity|0004450||IEA	tricarboxylic acid cycle|0006099||IEA		Isocitrate/isopropylmalate dehydrogenase	ko:K00031	ko00020,ko00480,ko00720,ko01100,ko01110,ko01120,ko01130,ko01200,ko01210,ko01230,ko04146,map00020,map00480,map00720,map01100,map01110,map01120,map01130,map01200,map01210,map01230,map04146	M00009,M00010,M00173,M00740	R00267,R00268,R01899	RC00001,RC00084,RC00114,RC00626,RC02801	br01601,ko00000,ko00001,ko00002,ko01000	-	Iso_dh	2355.42	0.4381	0.12718	38.2048	2.77025e-06	8.74945e-06	1976.17	2794.47	2123.09	2378.33	2394.7	2590.68	1843.83	2677.75
WP_259091896.1	hypothetical protein													2352.2	-0.338406	0.187912	104.84	1.07733e-19	1.64795e-18	2149.09	1618.57	1565.05	2918	1864.1	2208.26	4370.09	1699.39
WP_259096087.1	glycosyltransferase family 9 protein			GT9									mRNA binding|0003729||IEA	2345.22	-0.171721	0.309501	63.7364	2.69733e-11	1.8798e-10	2905.11	581.188	2965.95	2780.93	2866.96	2484.64	1978.39	2579.4
WP_259097015.1	HAD family hydrolase	hydrolase activity|0016787||IEA			haloacid dehalogenase superfamily, subfamily IA, variant 1 with third motif having Dx(3-4)D or Dx(3-4)E	ko:K07025	-	-	-	-	ko00000	-	HAD_2,Hydrolase	2339.6	-0.241687	0.248759	15.5835	0.0292068	0.0388686	2468.61	2908.32	1849	1855.6	1815.21	2694.72	2699.48	2087.53
WP_259094771.1	type III-A CRISPR-associated protein Cas10/Csm1	molecular_function|0003674||IEA	maintenance of CRISPR repeat elements|0043571||IEA										DNA topoisomerase type II (double strand cut%2C ATP-hydrolyzing) inhibitor activity|0008657||IEA,protein homodimerization activity|0042803||IEA	2331.45	0.122171	0.14736	83.3333	2.87409e-15	3.01612e-14	1966.8	3531.43	3245.3	1721.4	1987.08	2210.07	2039.26	2140.07
WP_018195293.1	hypothetical protein				PFAM Oligopeptide transporter OPT superfamily	-	-	-	-	-	-	-	-	2328.88	0.0506803	0.184913	136.411	2.86821e-26	7.29173e-25	1865.19	4557.42	2923.39	1488.39	2350.69	2383.92	1335.68	1931.83
WP_259102343.1	hypothetical protein												catalytic activity|0003824||IEA	2323.37	0.104113	0.14314	25.0351	0.000747997	0.0014502	2376.54	2140.58	2138.31	2354.64	2334.32	2836.04	1794.4	2554.08
WP_259095986.1	tryptophan--tRNA ligase	tryptophan-tRNA ligase activity|0004830||IEA	tryptophanyl-tRNA aminoacylation|0006436||IEA		Tryptophanyl-tRNA synthetase	ko:K01867	ko00970,map00970	M00359,M00360	R03664	RC00055,RC00523	ko00000,ko00001,ko00002,ko01000,ko01007,ko03016	-	tRNA-synt_1b	2322.35	-0.424927	0.155315	61.3589	8.07725e-11	5.34045e-10	2483.18	1552.58	1978.21	2971.31	2085.02	2486.3	2978.61	1849.75
WP_259094782.1	type III-A CRISPR-associated protein Cas10/Csm1	molecular_function|0003674||IEA	maintenance of CRISPR repeat elements|0043571||IEA											2321.46	-0.0799197	0.131717	89.1014	1.89203e-16	2.16146e-15	2232.3	3522.84	2815.11	1667.57	2156.85	2248.22	1926.56	2111.94
WP_259099710.1	hypothetical protein													2317.64	-0.34425	0.225447	107.402	3.17494e-20	5.09402e-19	2072.1	1189.1	1867.18	3211.5	1597.63	2022.54	4558.93	1631.96
WP_259100749.1	alpha-xylosidase	hydrolase activity%2C hydrolyzing O-glycosyl compounds|0004553||IEA	carbohydrate metabolic process|0005975||IEA	GH31_3	Belongs to the glycosyl hydrolase 31 family	ko:K01811	-	-	-	-	ko00000,ko01000	-	Gal_mutarotas_2,Glyco_hydro_31	2311.27	0.30632	0.283337	8.88318	0.261153	0.286293	2000.38	1616.1	2423.56	2595.03	2583.31	2421.11	2505.47	2473.29
WP_259093679.1	succinate dehydrogenase iron-sulfur subunit	succinate dehydrogenase (ubiquinone) activity|0008177||IEA,metal ion binding|0046872||IEA			TIGRFAM succinate dehydrogenase and fumarate reductase iron-sulfur protein	ko:K00240	ko00020,ko00190,ko00650,ko00720,ko01100,ko01110,ko01120,ko01130,ko01200,map00020,map00190,map00650,map00720,map01100,map01110,map01120,map01130,map01200	M00009,M00011,M00149,M00173,M00374,M00376	R02164	RC00045	ko00000,ko00001,ko00002,ko01000	-	Fer2_3,Fer4_10,Fer4_8	2310.57	-0.159061	0.175516	30.3339	8.24587e-05	0.000196615	2543.42	1835.97	1957.22	2403.04	2272.64	3170.46	1893.83	2277.56
WP_259095326.1	flotillin domain-containing protein				Flotillin	ko:K07192	ko04910,map04910	-	-	-	ko00000,ko00001,ko03036,ko04131,ko04147	-	Band_7,Flot	2310.31	-5.70707	1.16542	57.3067	5.19463e-10	3.04921e-09	6754.35	91.7255	150.962	5866.03	237.312	3620.73	221.307	129.286
WP_259102153.1	AAA family ATPase													2301.17	-0.625314	0.266707	26.013	0.000500984	0.00101948	2557.84	3146.7	1551.03	2661.85	1545.61	2167.51	2618.59	1658.35
WP_259092163.1	transglutaminase-like domain-containing protein				PFAM Transglutaminase-like	-	-	-	-	-	-	-	DUF4129,Transglut_core	2297.33	-0.731656	0.214707	249.792	3.06818e-50	4.81571e-48	2359.39	694.257	1202.82	3253.71	1396.71	1900.05	5485.8	1420.87
WP_259098966.1	bifunctional nuclease family protein				Bifunctional nuclease	ko:K03617,ko:K08999	-	-	-	-	ko00000	-	DNase-RNase,UVR	2293.92	0.0293895	0.141143	10.6497	0.154646	0.177173	2318.08	2446.24	1948.4	2374.72	1883.05	2339.37	2423.66	2365.75
WP_259096507.1	hypothetical protein													2289.9	-0.110395	0.30773	62.1076	5.72035e-11	3.82416e-10	1391	3674.03	3472.35	3689.51	1718.52	1755.44	1533.43	1288.64
WP_259095529.1	Do family serine endopeptidase	serine-type endopeptidase activity|0004252||IEA,protein binding|0005515||IEA	proteolysis|0006508||IEA,response to stress|0006950||IEA		Trypsin	ko:K04771	ko01503,ko02020,map01503,map02020	M00728	-	-	ko00000,ko00001,ko00002,ko01000,ko01002,ko03110	-	PDZ_2,Trypsin_2	2284.05	-1.21794	0.316984	43.4661	2.71098e-07	1.02371e-06	2492.99	4135.09	2532.77	2034.89	1698.11	2476.5	1717.62	1072
WP_259096344.1	sugar phosphate isomerase/epimerase family protein	catalytic activity|0003824||IEA			Xylulose 5-phosphate 3-epimerase	ko:K03079	ko00040,ko00053,ko01100,ko01120,map00040,map00053,map01100,map01120	M00550	R03244	RC00540	ko00000,ko00001,ko00002,ko01000	-	AP_endonuc_2	2277.25	0.396265	0.297128	6.89469	0.439926	0.461935	1877.27	2426.79	2511.62	1756.38	2698.34	2509.97	2185.74	2470.35
WP_259093818.1	diphosphate--fructose-6-phosphate 1-phosphotransferase				Catalyzes the phosphorylation of D-fructose 6-phosphate, the first committing step of glycolysis. Uses inorganic phosphate (PPi) as phosphoryl donor instead of ATP like common ATP-dependent phosphofructokinases (ATP-PFKs), which renders the reaction reversible, and can thus function both in glycolysis and gluconeogenesis. Consistently, PPi-PFK can replace the enzymes of both the forward (ATP-PFK)…	ko:K21071	ko00010,ko00030,ko00051,ko00052,ko00680,ko01100,ko01110,ko01120,ko01130,map00010,map00030,map00051,map00052,map00680,map01100,map01110,map01120,map01130	-	R00756,R00764,R02073,R03236,R04779	RC00002,RC00017	ko00000,ko00001,ko01000	-	PFK	2271.54	0.784051	0.242899	22.5697	0.0020249	0.00356755	1742.37	2880.14	1834.08	1819.75	2524.72	2380.84	1929.27	2999.73
WP_259100703.1	hypothetical protein												endopeptidase activity|0004175||IEA,serine-type D-Ala-D-Ala carboxypeptidase activity|0009002||IEA	2269.59	-0.0432551	0.129631	122.767	2.03148e-23	4.19066e-22	2134.96	3638.21	2937.44	1596.66	1916.22	2130.78	1835.47	2071.79
WP_259101960.1	efflux RND transporter periplasmic adaptor subunit	transporter activity|0005215||IEA	transport|0006810||IEA											2263.86	-0.486574	0.348959	14.9461	0.0366967	0.0477732	2735.26	2068.54	2554.02	3047.39	1186.82	2420.3	1883.95	1952.3
WP_259101226.1	hypothetical protein													2254.24	0.470083	0.308216	8.53204	0.288021	0.313646	1698.92	1855.51	2793.38	2087.89	2308.2	2747.94	2386.82	2352.99
WP_259099187.1	DNA primase	DNA primase activity|0003896||IEA	DNA replication%2C synthesis of RNA primer|0006269||IEA		RNA polymerase that catalyzes the synthesis of short RNA molecules used as primers for DNA polymerase during DNA replication	ko:K02316	ko03030,map03030	-	-	-	ko00000,ko00001,ko01000,ko03032	-	DnaB,DnaB_bind,Toprim_2,Toprim_4,Toprim_N,zf-CHC2	2250.85	-0.0582418	0.164495	33.6175	2.03078e-05	5.49972e-05	1930.43	2251.25	2560.76	2795.39	1942.9	1866.92	2805.91	1853.87
WP_259095116.1	beta-ketoacyl-ACP synthase III	3-oxoacyl-[acyl-carrier-protein] synthase activity|0004315||IEA,acyltransferase activity|0016746||IEA,beta-ketoacyl-acyl-carrier-protein synthase III activity|0033818||IEA	fatty acid biosynthetic process|0006633||IEA		Catalyzes the condensation reaction of fatty acid synthesis by the addition to an acyl acceptor of two carbons from malonyl-ACP. Catalyzes the first condensation reaction which initiates fatty acid synthesis and may therefore play a role in governing the total rate of fatty acid production. Possesses both acetoacetyl-ACP synthase and acetyl transacylase activities. Its substrate specificity deter…	ko:K00648	ko00061,ko01100,ko01212,map00061,map01100,map01212	M00082,M00083	R10707	RC00004,RC02729,RC02888	ko00000,ko00001,ko00002,ko01000,ko01004	-	ACP_syn_III,ACP_syn_III_C	2250.68	0.526416	0.289558	16.3423	0.0221664	0.0304146	1676.2	2395.56	2448.92	1702.14	3004.58	2859.4	1822.08	2413.9
WP_259095379.1	tetratricopeptide repeat protein												2-C-methyl-D-erythritol 2%2C4-cyclodiphosphate synthase activity|0008685||IEA	2242.89	-0.313859	0.175883	16.998	0.0174088	0.0246313	2503.23	2821.72	1956.55	2023.3	1899.68	2384.34	2130.4	2014.04
WP_259101907.1	FlgD immunoglobulin-like domain containing protein													2240.07	-1.17974	0.338099	80.7078	9.87921e-15	9.6389e-14	2428.37	1458.14	1410.4	4442.97	913.967	1567.12	3908.9	1072.07
WP_259101972.1	efflux RND transporter permease subunit	transmembrane transporter activity|0022857||IEA											shikimate 3-dehydrogenase (NADP+) activity|0004764||IEA	2237.49	-0.0211267	0.23056	21.8971	0.00264631	0.0045566	2102.03	2612.48	3263.63	2301.61	1580.1	2362.45	1728.99	2071.54
WP_259096996.1	class II fumarate hydratase	fumarate hydratase activity|0004333||IEA	tricarboxylic acid cycle|0006099||IEA,fumarate metabolic process|0006106||IEA,malate metabolic process|0006108||IEA		Involved in the TCA cycle. Catalyzes the stereospecific interconversion of fumarate to L-malate	ko:K01679	ko00020,ko00620,ko00720,ko01100,ko01110,ko01120,ko01130,ko01200,ko04934,ko05200,ko05211,map00020,map00620,map00720,map01100,map01110,map01120,map01130,map01200,map04934,map05200,map05211	M00009,M00011,M00173,M00376	R01082	RC00443	ko00000,ko00001,ko00002,ko01000	-	FumaraseC_C,Lyase_1	2237.2	0.232168	0.212167	32.1835	3.75554e-05	9.68392e-05	2083.65	2852.89	2307.67	1729.99	2525.5	2636.61	1433.72	2447.15
WP_259094298.1	cold-shock protein	transcription antitermination factor activity%2C RNA binding|0001072||IEA,nucleic acid binding|0003676||IEA,RNA binding|0003723||IEA			Cold shock protein domain	ko:K03704	-	-	-	-	ko00000,ko03000	-	CSD	2237.03	-0.236992	0.191572	17.3296	0.0153902	0.0221085	2771.28	2397.3	1826.54	2458.24	1717.73	1982.3	2081.11	2351.79
WP_259100363.1	hypothetical protein													2234.75	-0.947811	0.209793	174.071	3.47726e-34	1.45964e-32	2241.43	1102.27	1366.29	4102.96	1256.75	2307.63	3723.04	1162.14
WP_259101244.1	Gfo/Idh/MocA family oxidoreductase	oxidoreductase activity|0016491||IEA,oxidoreductase activity%2C acting on NAD(P)H|0016651||IEA			Oxidoreductase family, NAD-binding Rossmann fold	-	-	-	-	-	-	-	GFO_IDH_MocA	2233	0.345564	0.192647	45.2562	1.21958e-07	4.91921e-07	1796.28	1764.12	1483.34	2037.39	2275.6	2770.48	3219.88	2281.22
WP_259097365.1	Asp-tRNA(Asn)/Glu-tRNA(Gln) amidotransferase subunit GatA	glutaminyl-tRNA synthase (glutamine-hydrolyzing) activity|0050567||IEA	glutamyl-tRNA aminoacylation|0006424||IEA		Allows the formation of correctly charged Gln-tRNA(Gln) through the transamidation of misacylated Glu-tRNA(Gln) in organisms which lack glutaminyl-tRNA synthetase. The reaction takes place in the presence of glutamine and ATP through an activated gamma-phospho-Glu-tRNA(Gln)	ko:K02433	ko00970,ko01100,map00970,map01100	-	R03905,R04212	RC00010	ko00000,ko00001,ko01000,ko03029	-	Amidase	2231.42	-0.0362245	0.243467	11.4681	0.119463	0.140149	1971.51	1765.1	2095.92	2467.3	2338.02	2554.85	2726.53	1922.46
WP_259095561.1	translocation/assembly module TamB domain-containing protein		protein secretion|0009306||IEA											2231.18	-0.0102977	0.174387	23.1	0.00163759	0.0029529	2242.43	2174.55	2994.69	2669.04	1917.15	1963.61	1810.92	2226.88
WP_259096416.1	DUF4091 domain-containing protein			GH123										2228.09	0.034312	0.175612	16.3226	0.0223271	0.0306002	1988.17	1778.83	2602.43	2149.57	2513.49	2473.49	2502.56	2036.09
WP_259092103.1	hypothetical protein												nucleic acid binding|0003676||IEA,endonuclease activity|0004519||IEA	2227.36	-1.33431	0.36961	90.9994	7.71199e-17	9.30187e-16	2195.89	707.607	1732.09	2843.58	1028.71	2762.5	5112.78	871.08
WP_259094026.1	hypothetical protein												serine-type peptidase activity|0008236||IEA	2216.63	0.0907078	0.152716	46.9584	5.68721e-08	2.44124e-07	1825.24	2879.24	2477.24	1852.12	1820.43	2050.94	2839.69	1942.91
WP_259101119.1	DNA-directed RNA polymerase subunit alpha	DNA binding|0003677||IEA,DNA-directed 5'-3' RNA polymerase activity|0003899||IEA,protein dimerization activity|0046983||IEA	DNA-templated transcription|0006351||IEA		DNA-dependent RNA polymerase catalyzes the transcription of DNA into RNA using the four ribonucleoside triphosphates as substrates	ko:K03040	ko00230,ko00240,ko01100,ko03020,map00230,map00240,map01100,map03020	M00183	R00435,R00441,R00442,R00443	RC02795	br01611,ko00000,ko00001,ko00002,ko01000,ko03021,ko03400	-	RNA_pol_A_CTD,RNA_pol_A_bac,RNA_pol_L	2215.69	1.13048	0.245352	34.2036	1.57771e-05	4.36775e-05	1447.41	2746.88	2138	1487.17	2194.13	2207.13	2303.26	3168.44
WP_259095547.1	N-acetylmuramoyl-L-alanine amidase	N-acetylmuramoyl-L-alanine amidase activity|0008745||IEA,metal ion binding|0046872||IEA			N-acetylmuramoyl-L-alanine amidase	ko:K01448	ko01503,map01503	M00727	R04112	RC00064,RC00141	ko00000,ko00001,ko00002,ko01000,ko01011,ko03036	-	Amidase_3,Big_4,Big_5,CW_binding_2,GHL10	2211.35	-0.312185	0.274329	35.1583	1.04438e-05	2.98513e-05	2667.48	1167.77	1646.58	3056.92	1597.72	2551.5	2461.53	2148.49
WP_259097027.1	enoyl-ACP reductase				Enoyl- acyl-carrier-protein reductase NADH	ko:K00208	ko00061,ko00333,ko00780,ko01100,ko01130,ko01212,map00061,map00333,map00780,map01100,map01130,map01212	M00083,M00572	R01404,R04429,R04430,R04724,R04725,R04955,R04956,R04958,R04959,R04961,R04962,R04966,R04967,R04969,R04970,R07765,R10118,R10122,R11671	RC00052,RC00076,RC00120	ko00000,ko00001,ko00002,ko01000,ko01004	-	adh_short_C2	2210.92	0.769792	0.16514	32.8757	2.79261e-05	7.38017e-05	1709.38	2116.33	1744.13	2086.83	2012.47	2556.18	2326.4	2913.88
WP_259095954.1	cytochrome c biogenesis protein CcsA	heme binding|0020037||IEA	cytochrome complex assembly|0017004||IEA											2204.09	0.172855	0.177958	44.2409	1.91937e-07	7.43446e-07	1871.5	3246.79	2600.39	1615.32	1881.73	1972.06	2359.65	2109.92
WP_259093609.1	SPFH domain-containing protein				prohibitin homologues	ko:K07192	ko04910,map04910	-	-	-	ko00000,ko00001,ko03036,ko04131,ko04147	-	Band_7	2190.35	-0.654067	0.242558	44.3778	1.80566e-07	7.03176e-07	2447.18	2049.63	1681.62	2929.64	1267.28	1867.2	3247.63	1555.32
WP_259095756.1	MraY family glycosyltransferase	metal ion binding|0046872||IEA			PFAM Glycosyl transferase family 4	ko:K02851	-	-	R08856	RC00002	ko00000,ko01000,ko01003,ko01005	-	Glycos_transf_4	2188.17	-0.297939	0.170215	159.512	4.06325e-31	1.43807e-29	2059.35	1072.16	1550.83	2907.75	1611.86	2303.91	3920.04	1674.9
WP_259091996.1	phosphoribosylformylglycinamidine synthase subunit PurL	phosphoribosylformylglycinamidine synthase activity|0004642||IEA	'de novo' IMP biosynthetic process|0006189||IEA		Part of the phosphoribosylformylglycinamidine synthase complex involved in the purines biosynthetic pathway. Catalyzes the ATP-dependent conversion of formylglycinamide ribonucleotide (FGAR) and glutamine to yield formylglycinamidine ribonucleotide (FGAM) and glutamate. The FGAM synthase complex is composed of three subunits. PurQ produces an ammonia molecule by converting glutamine to glutamate.…	ko:K01952	ko00230,ko01100,ko01110,ko01130,map00230,map01100,map01110,map01130	M00048	R04463	RC00010,RC01160	ko00000,ko00001,ko00002,ko01000	-	AIRS,AIRS_C	2187.59	-0.0713356	0.109272	62.3167	5.19454e-11	3.51166e-10	2073.94	1697.86	1810.57	2398.06	2157.72	2487.5	2766.03	1973.44
WP_259102328.1	F0F1 ATP synthase subunit alpha	proton-transporting ATP synthase activity%2C rotational mechanism|0046933||IEA	proton motive force-driven ATP synthesis|0015986||IEA		Produces ATP from ADP in the presence of a proton gradient across the membrane. The alpha chain is a regulatory subunit	ko:K02111	ko00190,ko00195,ko01100,map00190,map00195,map01100	M00157	-	-	ko00000,ko00001,ko00002,ko00194,ko01000	3.A.2.1	ATP-synt_ab,ATP-synt_ab_C,ATP-synt_ab_N	2186.18	0.401336	0.283385	34.9178	1.15893e-05	3.29427e-05	1606.59	3300.87	2759.94	1276.16	2773.39	2352.16	1685.57	2121.76
WP_259096453.1	hypothetical protein													2185.51	-1.85776	0.637167	132.711	1.70478e-25	4.10284e-24	636.369	226.355	2481.52	1097.54	157.463	7887.68	4244.25	175.581
WP_259094869.1	BON domain-containing protein				Belongs to the GSP D family	ko:K02280	-	-	-	-	ko00000,ko02035,ko02044	-	Secretin,T2SS-T3SS_pil_N	2184.39	-0.22091	0.204629	39.9132	1.30786e-06	4.38383e-06	1996	3462.09	1829.34	2381.9	1688.17	1886.94	2234.3	1712.63
WP_259097909.1	M42 family metallopeptidase				COG1363 Cellulase M and related proteins	-	-	-	-	-	-	-	Peptidase_M42	2183.95	0.296244	0.265686	3.52348	0.832732	0.838773	1922.21	2163.96	2197.98	1955.97	2634.92	2145.52	2245.75	2360.31
WP_259096882.1	PIN domain-containing protein													2173.89	0.361915	0.280145	10.2261	0.176118	0.199744	1866.39	1753.04	3138.76	2209.06	2368.18	2036.44	2007.24	2398.39
WP_259099698.1	FAD/NAD(P)-binding oxidoreductase	nucleotide binding|0000166||IEA,oxidoreductase activity|0016491||IEA			PFAM FAD-dependent pyridine nucleotide-disulphide oxidoreductase	ko:K17218	ko00920,map00920	-	R10152	RC03155	ko00000,ko00001,ko01000	-	Pyr_redox_2	2173.56	-1.22434	0.324313	103.115	2.45056e-19	3.62563e-18	2192.65	4374.52	4654.66	2240.49	907.791	1337.97	1146.67	938.812
WP_259097950.1	hypothetical protein													2162.4	0.0500898	0.192293	337.689	5.31261e-69	2.39731e-66	1511.89	2923.29	7330.14	1248.96	1661.44	1861.05	752.061	1565.98
WP_259092909.1	hypothetical protein												lytic endotransglycosylase activity|0008932||IEA	2159.26	-1.18859	0.22553	138.129	1.25306e-26	3.27794e-25	2825.07	673.794	1602.64	2425.62	2034.62	2778.16	3467.85	1239.21
WP_259096012.1	adenylosuccinate synthase	adenylosuccinate synthase activity|0004019||IEA,GTP binding|0005525||IEA	purine nucleotide biosynthetic process|0006164||IEA		Plays an important role in the de novo pathway of purine nucleotide biosynthesis. Catalyzes the first committed step in the biosynthesis of AMP from IMP	ko:K01939	ko00230,ko00250,ko01100,map00230,map00250,map01100	M00049	R01135	RC00458,RC00459	ko00000,ko00001,ko00002,ko01000	-	Adenylsucc_synt	2155.08	0.236293	0.225354	5.31519	0.621559	0.636547	2070.32	2149.03	1904.19	1835.6	2400.7	2129.35	2311.01	2438.66
WP_259099640.1	cysteine synthase family protein	transferase activity%2C transferring alkyl or aryl (other than methyl) groups|0016765||IEA	cysteine biosynthetic process from serine|0006535||IEA		Pyridoxal-phosphate dependent enzyme	ko:K12339,ko:K21148	ko00270,ko00920,ko01100,ko01110,ko01120,ko01130,ko01200,ko01230,ko04122,map00270,map00920,map01100,map01110,map01120,map01130,map01200,map01230,map04122	M00021	R00897,R03132,R03601,R04859,R10610	RC00020,RC02814,RC02821,RC02876,RC03225	ko00000,ko00001,ko00002,ko01000	-	PALP	2151.3	0.971639	0.311355	18.1152	0.011461	0.0169497	1518.54	1944.56	2362.71	1500.87	2645.74	2519.92	1975.58	2977.76
WP_259094395.1	HIT domain-containing protein				Hit family	ko:K19710	ko00230,map00230	-	R00126,R01618	RC00002,RC02753,RC02795	ko00000,ko00001,ko01000	-	HIT	2146.94	0.32771	0.214248	13.0858	0.0700458	0.0859501	2054.42	2642.12	1827.14	2016.71	1836.75	2183.08	1827.05	2578.27
WP_259093748.1	hypothetical protein													2135.32	-0.231606	0.141925	20.1449	0.00526502	0.00843993	2239.26	2294.95	1574.86	2108.06	2170.44	2148.37	2464.91	1906.56
WP_259096300.1	DUF3696 domain-containing protein				AAA ATPase domain	-	-	-	-	-	-	-	AAA_15	2123.93	-0.39944	0.188664	202.376	3.60201e-40	2.32201e-38	1950.33	861.428	1337.42	3229.67	1597.74	1873.62	4225.11	1478.54
WP_259096047.1	sugar phosphate isomerase/epimerase family protein	catalytic activity|0003824||IEA			Xylose isomerase-like TIM barrel	-	-	-	-	-	-	-	AP_endonuc_2	2115.57	-0.276072	0.176493	7.79715	0.350821	0.375137	2210.55	2386.97	2097.46	1930.38	2048.07	2344.63	2052.63	1825.31
WP_259102030.1	Gfo/Idh/MocA family oxidoreductase	oxidoreductase activity|0016491||IEA,oxidoreductase activity%2C acting on NAD(P)H|0016651||IEA		GH177	dehydrogenases and related proteins	-	-	-	-	-	-	-	GFO_IDH_MocA	2100.26	0.630653	0.227653	21.9939	0.00254662	0.00439449	1747.99	1888.26	2577	1479.94	2374	2299.2	1979.69	2706.13
WP_259101062.1	50S ribosomal protein L4	structural constituent of ribosome|0003735||IEA	translation|0006412||IEA		One of the primary rRNA binding proteins, this protein initially binds near the 5'-end of the 23S rRNA. It is important during the early stages of 50S assembly. It makes multiple contacts with different domains of the 23S rRNA in the assembled 50S subunit and ribosome	ko:K02926	ko03010,map03010	M00178	-	-	br01610,ko00000,ko00001,ko00002,ko03011	-	Ribosomal_L4	2095.29	0.854106	0.203846	114.432	1.10321e-21	1.99129e-20	1519.8	3567.88	1912.27	1031.73	2366.75	2354.48	1291.67	2747.19
WP_259102348.1	hypothetical protein													2093.08	-0.12422	0.190292	49.4063	1.88887e-08	8.90805e-08	1821.79	1619.67	2301.55	2958.83	1437.92	2044.44	2739.62	1671.93
WP_259092598.1	phenylalanine--tRNA ligase subunit beta	phenylalanine-tRNA ligase activity|0004826||IEA	phenylalanyl-tRNA aminoacylation|0006432||IEA		Belongs to the phenylalanyl-tRNA synthetase beta subunit family. Type 1 subfamily	ko:K01890	ko00970,map00970	M00359,M00360	R03660	RC00055,RC00523	ko00000,ko00001,ko00002,ko01000,ko01007,ko03016	-	B3_4,B5,FDX-ACB,tRNA-synt_2d,tRNA_bind	2091.79	0.462354	0.177441	24.8234	0.000815463	0.0015692	1902.96	2187.23	1876.35	1537.92	2477.89	2236.54	1951.06	2621.22
WP_259100193.1	HD domain-containing phosphohydrolase				PFAM metal-dependent phosphohydrolase, HD sub domain	-	-	-	-	-	-	-	CHASE2,GAF_2,GAF_3,GGDEF,HD,HD_5,HisKA_7TM,SBP_bac_3	2091.08	0.495238	0.193524	14.4804	0.0432671	0.0554076	1717.19	1925.11	1696.34	1939.61	2319.35	2376.47	2279.81	2419.27
WP_259096753.1	phosphate ABC transporter ATP-binding protein PstB	ATP binding|0005524||IEA,ATPase-coupled phosphate ion transmembrane transporter activity|0015415||IEA			Part of the ABC transporter complex PstSACB involved in phosphate import. Responsible for energy coupling to the transport system	ko:K02036	ko02010,map02010	M00222	-	-	ko00000,ko00001,ko00002,ko01000,ko02000	3.A.1.7	ABC_tran	2084.97	-0.201443	0.156059	17.1513	0.0164464	0.0234669	2128.71	2186.42	1635.52	2450.23	1837.72	2305.87	2052.14	1850.93
WP_259097239.1	protein kinase	protein kinase activity|0004672||IEA	protein phosphorylation|0006468||IEA											2081.56	-0.44894	0.141833	140.631	3.74837e-27	1.00982e-25	1846.93	1857.56	1883.85	3225.9	1456.29	1744.5	3010.68	1352.4
WP_259101875.1	phosphoglucosamine mutase	phosphoglucosamine mutase activity|0008966||IEA	lipopolysaccharide biosynthetic process|0009103||IEA,peptidoglycan biosynthetic process|0009252||IEA		Phosphoglucomutase/phosphomannomutase, alpha/beta/alpha domain III	ko:K01840,ko:K03431,ko:K15778	ko00010,ko00030,ko00051,ko00052,ko00230,ko00500,ko00520,ko00521,ko01100,ko01110,ko01120,ko01130,map00010,map00030,map00051,map00052,map00230,map00500,map00520,map00521,map01100,map01110,map01120,map01130	M00114	R00959,R01057,R01818,R02060,R08639	RC00408	ko00000,ko00001,ko00002,ko01000	-	PGM_PMM_I,PGM_PMM_II,PGM_PMM_III,PGM_PMM_IV	2080.04	-0.383428	0.231216	219.822	7.19803e-44	7.02294e-42	1794.63	596.46	789.346	2743.02	1505.99	2392.1	4821.77	1375.43
WP_259094031.1	hypothetical protein													2078.77	0.666957	0.234457	41.5652	6.30477e-07	2.23798e-06	2170.83	2260.41	1847.8	1686.68	1956.46	1794.17	1348.55	3447.53
WP_259093015.1	selenide%2C water dikinase SelD	selenide%2C water dikinase activity|0004756||IEA	selenium compound metabolic process|0001887||IEA		Synthesizes selenophosphate from selenide and ATP	ko:K01008	ko00450,ko01100,map00450,map01100	-	R03595	RC00002,RC02878	ko00000,ko00001,ko01000,ko03016	-	AIRS,AIRS_C	2074.89	0.422806	0.158094	32.8384	2.83764e-05	7.48821e-05	1883.53	1649.75	1820.26	1690.51	2182.17	2486.56	2313.88	2523.36
WP_018195436.1	30S ribosomal protein S2	structural constituent of ribosome|0003735||IEA	translation|0006412||IEA		Belongs to the universal ribosomal protein uS2 family	ko:K02967	ko03010,map03010	M00178,M00179	-	-	br01610,ko00000,ko00001,ko00002,ko03011	-	Ribosomal_S2	2072.4	0.106788	0.188518	56.1232	8.9269e-10	5.05111e-09	1936.04	3344.64	1498.18	1405.22	2057.69	2158.81	1897.72	2084.61
WP_259101091.1	50S ribosomal protein L6	structural constituent of ribosome|0003735||IEA,rRNA binding|0019843||IEA	translation|0006412||IEA		This protein binds to the 23S rRNA, and is important in its secondary structure. It is located near the subunit interface in the base of the L7 L12 stalk, and near the tRNA binding site of the peptidyltransferase center	ko:K02933	ko03010,map03010	M00178,M00179	-	-	br01610,ko00000,ko00001,ko00002,ko03011	-	Ribosomal_L6	2071.51	0.332788	0.236068	35.3494	9.61403e-06	2.76767e-05	1688.62	3036.22	2178.56	1582.73	2491.46	2301.42	1342.31	2126.45
WP_259093606.1	NfeD family protein												guanylate kinase activity|0004385||IEA	2068.39	-0.517593	0.246964	31.3561	5.3441e-05	0.00013305	2373.39	1441.63	1893.11	2999.92	1367.2	2214.55	2307.29	1657.91
WP_259096277.1	MG2 domain-containing protein	endopeptidase inhibitor activity|0004866||IEA												2067.18	-0.934469	0.215842	59.5058	1.8945e-10	1.18735e-09	2600.84	1216.02	3096.17	2379	1716.4	1873.36	2520.69	1361.04
WP_259101668.1	GAF domain-containing sensor histidine kinase				HAMP (Histidine kinases, Adenylyl cyclases, Methyl binding proteins, Phosphatases) domain	ko:K07711	ko02020,ko02024,map02020,map02024	M00502	-	-	ko00000,ko00001,ko00002,ko01000,ko01001,ko02022	-	HAMP,HATPase_c,HisKA	2066.61	-0.266272	0.162939	96.5592	5.53184e-18	7.39627e-17	1926.95	1470.61	1527.3	2590.58	1576.27	2101.77	3394.57	1601.59
WP_259102117.1	sulfatase				PFAM sulfatase	-	-	-	-	-	-	-	Sulfatase	2064.97	1.06718	0.402814	18.9815	0.00824548	0.0126396	1407.88	1884.53	2449.64	1093.78	2778.47	1860.79	2460.82	2949.89
WP_259092464.1	DNA polymerase/3'-5' exonuclease PolX	DNA binding|0003677||IEA,DNA-directed DNA polymerase activity|0003887||IEA	DNA repair|0006281||IEA		DNA polymerase X family	ko:K02347	-	-	-	-	ko00000,ko03400	-	DNA_pol_B_palm,DNA_pol_B_thumb,HHH_5,HHH_8,PHP	2060.13	-0.672651	0.14366	43.2467	2.98904e-07	1.12753e-06	2458	1640.77	2125.44	2162.51	2171.68	1903.64	2535.85	1542.1
WP_259092293.1	conjugal transfer protein TraF													2047.98	0.341203	0.249327	24.553	0.000910369	0.00172697	1543.09	2393.93	2239.28	1361.51	2221.69	1989.66	2801.73	1954.65
WP_259092893.1	hypothetical protein													2038.76	0.638151	0.268015	54.2568	2.0922e-09	1.12561e-08	1577.34	2774.2	2258.74	771.108	1996.74	2130.74	2405.71	2454.86
WP_259093932.1	cold shock domain-containing protein				PFAM 'Cold-shock' DNA-binding domain	ko:K03704	-	-	-	-	ko00000,ko03000	-	CSD	2035.75	0.443126	0.423273	42.9618	3.39272e-07	1.26657e-06	2370.48	1860.11	1230	1250.57	1619.04	3610.11	715.541	3222.66
WP_259096782.1	Gfo/Idh/MocA family oxidoreductase	oxidoreductase activity|0016491||IEA,oxidoreductase activity%2C acting on NAD(P)H|0016651||IEA			Oxidoreductase family, NAD-binding Rossmann fold	-	-	-	-	-	-	-	GFO_IDH_MocA	2034.39	0.117559	0.300345	23.0716	0.00165633	0.00298371	1710.91	3001.62	2232.14	1296.05	2653.58	2191.3	1605.83	1855.98
WP_259095416.1	diguanylate cyclase	cyclase activity|0009975||IEA	regulation of signal transduction|0009966||IEA		TIGRFAM diguanylate cyclase (GGDEF) domain	-	-	-	-	-	-	-	GAF_2,GAF_3,GGDEF	2034.24	0.137111	0.19827	75.4851	1.14304e-13	1.02391e-12	1623.42	1134.35	1805.81	2854.46	1701.41	2074.65	3108.41	1784.32
WP_259100393.1	long-chain fatty acid--CoA ligase				AMP-binding enzyme C-terminal domain	ko:K01897	ko00061,ko00071,ko01100,ko01212,ko02024,ko03320,ko04146,ko04216,ko04714,ko04920,map00061,map00071,map01100,map01212,map02024,map03320,map04146,map04216,map04714,map04920	M00086	R01280	RC00004,RC00014	ko00000,ko00001,ko00002,ko01000,ko01004,ko04147	4.C.1.1	AMP-binding,AMP-binding_C	2030.61	0.557398	0.310194	13.6709	0.0573535	0.0717665	1428.93	2270.8	2744.95	1457.92	2412.19	2013.36	2179.48	2102.52
WP_259096795.1	Gfo/Idh/MocA family oxidoreductase	oxidoreductase activity|0016491||IEA,oxidoreductase activity%2C acting on NAD(P)H|0016651||IEA		GH177	inositol 2-dehydrogenase activity	-	-	-	-	-	-	-	GFO_IDH_MocA	2026.01	0.360213	0.231066	21.2553	0.00341014	0.00571789	1439.27	2764.96	2328.78	1721.74	2086.67	1910.53	2229.48	1847.77
WP_259100314.1	TRAM domain-containing protein				Large family of predicted nucleotide-binding domains	-	-	-	-	-	-	-	TRAM	2021.78	-1.2194	0.273673	188.306	3.42345e-37	1.79111e-35	2075.08	497.118	1043.38	3940.96	934.75	2487.18	3616.16	891.154
WP_259101942.1	hypothetical protein												hydrolase activity|0016787||IEA,metal ion binding|0046872||IEA	2009.98	-1.04524	0.330169	174.174	3.30636e-34	1.40423e-32	1413.02	1050.65	796.358	1375.16	1419.73	1594.95	7144.11	684.609
WP_259095080.1	GDP-mannose 4%2C6-dehydratase				PFAM NAD-dependent epimerase dehydratase	ko:K01784,ko:K10011,ko:K12449	ko00052,ko00520,ko01100,ko01503,map00052,map00520,map01100,map01503	M00361,M00362,M00632,M00721,M00761	R00291,R01384,R01386,R02984,R07658,R07660	RC00026,RC00289,RC00508,RC01575,RC01811,RC01812	ko00000,ko00001,ko00002,ko01000,ko01005	-	Epimerase,Formyl_trans_C,Formyl_trans_N,GDP_Man_Dehyd	2006.03	0.138325	0.256252	25.888	0.000527401	0.00106424	1785.21	1500.06	1537.01	1895.79	2043.95	1941.07	3237.32	1964.12
WP_259095081.1	SDR family oxidoreductase				PFAM NAD-dependent epimerase dehydratase	ko:K01710	ko00521,ko00523,ko00525,ko01055,ko01130,map00521,map00523,map00525,map01055,map01130	M00793	R06513	RC00402	ko00000,ko00001,ko00002,ko01000	-	GDP_Man_Dehyd	1998.87	-0.0208886	0.204342	68.8134	2.56535e-12	2.00453e-11	1866.53	1094.47	1390.67	2322.71	1938.61	2071.5	3244.21	1839.47
WP_026307513.1	50S ribosomal protein L5	structural constituent of ribosome|0003735||IEA	translation|0006412||IEA		This is 1 of the proteins that binds and probably mediates the attachment of the 5S RNA into the large ribosomal subunit, where it forms part of the central protuberance. In the 70S ribosome it contacts protein S13 of the 30S subunit (bridge B1b), connecting the 2 subunits	ko:K02931	ko03010,map03010	M00178,M00179	-	-	br01610,ko00000,ko00001,ko00002,ko03011	-	Ribosomal_L5,Ribosomal_L5_C	1998.06	0.89699	0.271025	47.8628	3.78736e-08	1.69843e-07	1362.67	3069.47	1954.07	1171.78	2334.8	2342.44	1309.58	2537.24
WP_259095085.1	SurA N-terminal domain-containing protein													1995.25	0.0226391	0.139775	12.2735	0.0919164	0.110239	1971.17	2120.59	2057.24	2220.05	1588.87	2067.04	1820.19	2002.09
WP_259094097.1	SCO family protein				SCO1/SenC	ko:K07152	-	-	-	-	ko00000,ko03029	-	SCO1-SenC	1990.71	-0.0995097	0.17853	34.5134	1.38031e-05	3.86872e-05	1939.16	2653.38	2341.33	1751.56	1809.07	2269.05	1409	1809.47
WP_259100434.1	molybdate ABC transporter substrate-binding protein	ABC-type molybdate transporter activity|0015412||IEA,molybdate ion binding|0030973||IEA	molybdate ion transport|0015689||IEA		TIGRFAM molybdenum ABC transporter, periplasmic molybdate-binding protein	ko:K02020	ko02010,map02010	M00189	-	-	ko00000,ko00001,ko00002,ko02000	3.A.1.8	SBP_bac_11	1989.01	0.179223	0.234023	54.4543	1.91213e-09	1.03335e-08	1491.94	3257.24	2799.62	1680.31	2178.41	1930.32	1218.32	1689.27
WP_259092321.1	polysaccharide biosynthesis tyrosine autokinase		extracellular polysaccharide biosynthetic process|0045226||IEA		COG0489 ATPases involved in chromosome partitioning	ko:K00903	-	-	-	-	ko00000,ko01000,ko01001	-	AAA_31,ParA	1987.51	0.376862	0.149086	48.4002	2.97349e-08	1.35022e-07	1859.09	2264.03	2154.86	1387.68	2277.66	2156.97	1539.12	2413.17
WP_259094052.1	fasciclin domain-containing protein				Four repeated domains in the Fasciclin I family of proteins, present in many other contexts.	-	-	-	-	-	-	-	Fasciclin	1986.05	-0.523897	0.228151	221.254	3.57538e-44	3.79621e-42	2023.76	5352.03	2224.25	846.714	1220.94	1781.86	855.788	1407.4
WP_259101215.1	arginine--tRNA ligase	arginine-tRNA ligase activity|0004814||IEA	arginyl-tRNA aminoacylation|0006420||IEA		TIGRFAM Arginyl-tRNA synthetase	ko:K01887	ko00970,map00970	M00359,M00360	R03646	RC00055,RC00523	ko00000,ko00001,ko00002,ko01000,ko01007,ko03016,ko03029	-	Arg_tRNA_synt_N,DALR_1,tRNA-synt_1d	1984.65	-0.0908692	0.251296	28.6538	0.000167301	0.000377709	2412.55	2267.87	1961.9	1693.18	1927.2	2257.36	1065.16	2265.21
WP_259099688.1	adenosylhomocysteinase	adenosylhomocysteinase activity|0004013||IEA	one-carbon metabolic process|0006730||IEA		May play a key role in the regulation of the intracellular concentration of adenosylhomocysteine	ko:K01251	ko00270,ko01100,map00270,map01100	M00035	R00192,R04936	RC00056,RC00069,RC01161,RC01243	ko00000,ko00001,ko00002,ko01000,ko01009,ko04147	-	AdoHcyase,AdoHcyase_NAD	1981.02	0.875927	0.302776	35.9463	7.4205e-06	2.18908e-05	1299.63	3063.93	2173.74	1254.94	2627.77	1982.58	1340.48	2384.91
WP_259092990.1	glycine C-acetyltransferase	glycine C-acetyltransferase activity|0008890||IEA,pyridoxal phosphate binding|0030170||IEA	biosynthetic process|0009058||IEA		Aminotransferase class I and II	ko:K00639	ko00260,map00260	-	R00371	RC00004,RC00394	ko00000,ko00001,ko01000,ko01007	-	Aminotran_1_2	1975.09	0.334766	0.189553	14.2758	0.0464875	0.0592584	1769.08	1843.89	1707.77	1606.82	2111.46	2179.94	2307.21	2230.91
WP_259094973.1	glycosyltransferase family 4 protein			GT4	Glycosyl transferase 4-like	-	-	-	-	-	-	-	Glyco_trans_4_2,Glycos_transf_1	1963.24	0.204794	0.291185	38.2528	2.71262e-06	8.58998e-06	1542.25	988.258	1663.68	2062.22	1930.17	2519.27	3111.91	1777.26
WP_259098404.1	type II secretion system ATPase GspE		protein secretion by the type II secretion system|0015628||IEA		Type II secretory pathway, ATPase PulE Tfp pilus assembly pathway, ATPase PilB	ko:K02454,ko:K02652	ko03070,ko05111,map03070,map05111	M00331	-	-	ko00000,ko00001,ko00002,ko02035,ko02044	3.A.15,3.A.15.2	T2SSE,T2SSE_N	1960.88	0.521679	0.280376	110.612	6.85385e-21	1.16162e-19	1162.07	2321.03	6078.6	1332.2	1722.39	1664.41	1031.36	1668.08
WP_259095595.1	HU family DNA-binding protein	DNA binding|0003677||IEA	chromosome condensation|0030261||IEA		Histone-like DNA-binding protein which is capable of wrapping DNA to stabilize it, and thus to prevent its denaturation under extreme environmental conditions	ko:K03530	-	-	-	-	ko00000,ko03032,ko03036,ko03400	-	Bac_DNA_binding	1960.85	0.778135	0.206112	65.2018	1.36974e-11	9.90934e-11	1436.96	2872.59	1301.93	1148.07	1942.51	2207.67	2087.75	2463.6
WP_259096376.1	hypothetical protein													1959.83	-0.216838	0.203061	60.1353	1.4185e-10	9.11171e-10	2011.02	3186.13	2091.31	1500.26	1935.1	2095.83	1163.98	1730.6
WP_259101283.1	30S ribosomal protein S9	structural constituent of ribosome|0003735||IEA	translation|0006412||IEA		maturation of SSU-rRNA from tricistronic rRNA transcript (SSU-rRNA, 5.8S rRNA, LSU-rRNA)	ko:K02996	ko03010,map03010	M00178,M00179	-	-	br01610,ko00000,ko00001,ko00002,ko03011	-	Ribosomal_S9	1957	0.0135226	0.254664	28.7135	0.000163167	0.000369069	1767.34	2865.49	2691.17	1500.16	2254.26	1719.59	1418.12	1783.69
WP_302898711.1	RHS repeat-associated core domain-containing protein				COG3209 Rhs family protein	-	-	-	-	-	-	-	RHS_repeat,Tox-HDC	1954.53	-0.86861	0.245276	40.747	9.0535e-07	3.13057e-06	2399.79	2805.62	1302.72	2132.99	1275.06	1679.41	2282.42	1314.45
WP_259094805.1	sulfatase				PFAM sulfatase	-	-	-	-	-	-	-	Sulfatase	1952.73	0.303447	0.36987	18.8989	0.00851008	0.0129955	1464.21	2709.73	3026.52	1279.6	2352.1	2044.72	1429.17	1806.81
WP_259095495.1	LL-diaminopimelate aminotransferase				PFAM Aminotransferase class I and II	ko:K10206	ko00300,ko01100,ko01110,ko01130,ko01230,map00300,map01100,map01110,map01130,map01230	M00527	R07613	RC00006,RC01847	ko00000,ko00001,ko00002,ko01000,ko01007	-	Aminotran_1_2	1936.01	0.764519	0.281904	31.2837	5.5112e-05	0.000136738	1483.01	2486.81	2214.45	1089.54	2408.93	2049.62	1487.07	2519.12
WP_259100226.1	DUF5107 domain-containing protein													1931.76	0.530701	0.257387	32.5246	3.2458e-05	8.44798e-05	1436.64	2817.57	2443.76	1377.21	2429.64	1787.35	1423.31	2075.23
WP_259095089.1	protein translocase subunit SecD	protein-transporting ATPase activity|0015450||IEA	protein transport by the Sec complex|0043952||IEA		Part of the Sec protein translocase complex. Interacts with the SecYEG preprotein conducting channel. SecDF uses the proton motive force (PMF) to complete protein translocation after the ATP-dependent function of SecA	ko:K03072,ko:K12257	ko02024,ko03060,ko03070,map02024,map03060,map03070	M00335	-	-	ko00000,ko00001,ko00002,ko02044	2.A.6.4,3.A.5.2,3.A.5.7	SecD_SecF,Sec_GG	1931.35	0.499429	0.139621	193.566	2.64196e-38	1.44507e-36	1540.39	3649.55	1947.02	1375.05	1771.86	1789.61	1152.31	2177.09
WP_259100953.1	L-fucose/L-arabinose isomerase family protein				L-fucose isomerase, first N-terminal domain	ko:K01818	ko00051,ko01120,map00051,map01120	-	R03163	RC00434	ko00000,ko00001,ko01000	-	Fucose_iso_C,Fucose_iso_N1,Fucose_iso_N2	1927.26	0.511597	0.255296	29.2482	0.000130356	0.000298785	1303.47	2901.78	2100.87	1366.56	2188.29	1811.24	2033.15	1857.61
WP_259099531.1	AAA family ATPase	ATP binding|0005524||IEA,ATP hydrolysis activity|0016887||IEA			ATPase activity	ko:K06027	ko04138,ko04721,ko04727,ko04962,map04138,map04721,map04727,map04962	-	-	-	ko00000,ko00001,ko01000,ko04131	1.F.1.1	AAA	1925.66	-1.39873	0.325224	220.205	5.968e-44	5.98458e-42	1774.04	333.492	620.941	3253.83	861.026	1587.3	5512.21	672.669
WP_259100549.1	methionine--tRNA ligase	nucleotide binding|0000166||IEA,methionine-tRNA ligase activity|0004825||IEA,ATP binding|0005524||IEA	methionyl-tRNA aminoacylation|0006431||IEA		Is required not only for elongation of protein synthesis but also for the initiation of all mRNA translation through initiator tRNA(fMet) aminoacylation	ko:K01874	ko00450,ko00970,map00450,map00970	M00359,M00360	R03659,R04773	RC00055,RC00523	ko00000,ko00001,ko00002,ko01000,ko01007,ko03016	-	Anticodon_1,tRNA-synt_1g	1915.51	-0.00487127	0.171083	8.17039	0.31781	0.342987	1844.57	1703.68	2039.81	1812.72	2265.88	2148.47	1828.92	1838.24
WP_259096491.1	DUF1559 domain-containing protein				general secretion pathway protein	ko:K02456,ko:K02679	ko03070,ko05111,map03070,map05111	M00331	-	-	ko00000,ko00001,ko00002,ko02044	3.A.15	N_methyl,SBP_bac_10	1914.79	-0.965647	0.188424	101.022	6.63607e-19	9.43158e-18	2073.17	2690.9	3001.23	2089	1061.05	1438.66	1980	1061.91
WP_259092823.1	DUF502 domain-containing protein				Protein of unknown function (DUF502)	-	-	-	-	-	-	-	DUF502	1910.07	0.232979	0.133265	47.3416	4.7879e-08	2.11074e-07	1847.72	1400.44	1613.58	2033.96	1832.9	2468.07	1787.5	2171.84
WP_029699549.1	hypothetical protein												glycosyltransferase activity|0016757||IEA	1903.66	-0.453025	0.177578	26.9846	0.000335408	0.000706844	2134.58	2096.59	1326.04	1961.29	1561.64	1970.45	2313.51	1558.65
WP_259100873.1	slipin family protein				prohibitin homologues	-	-	-	-	-	-	-	Band_7	1898.62	-0.12614	0.227451	16.5237	0.0207398	0.0287192	1916.61	1955.42	1688.38	2253.19	1323.98	2404.68	1629.37	1755.72
WP_259091987.1	NADH-quinone oxidoreductase subunit M	oxidoreductase activity%2C acting on NAD(P)H%2C quinone or similar compound as acceptor|0016655||IEA			proton-translocating NADH-quinone oxidoreductase, chain M	ko:K00342	ko00190,ko01100,map00190,map01100	M00144	R11945	RC00061	ko00000,ko00001,ko00002,ko01000	3.D.1	Oxidored_q5_N,Proton_antipo_M	1897.51	0.237029	0.141366	22.1969	0.00234927	0.00408914	1585.9	2233.35	2159.48	1618.79	1783.9	2095.41	1884.52	1868.15
WP_259096309.1	acetyl-CoA carboxylase biotin carboxylase subunit	acetyl-CoA carboxylase activity|0003989||IEA,biotin carboxylase activity|0004075||IEA	fatty acid biosynthetic process|0006633||IEA		TIGRFAM acetyl-CoA carboxylase, biotin carboxylase	ko:K01961	ko00061,ko00620,ko00640,ko00720,ko01100,ko01110,ko01120,ko01130,ko01200,ko01212,map00061,map00620,map00640,map00720,map01100,map01110,map01120,map01130,map01200,map01212	M00082,M00376	R00742,R04385	RC00040,RC00253,RC00367	ko00000,ko00001,ko00002,ko01000	-	Biotin_carb_C,Biotin_carb_N,CPSase_L_D2	1895.23	0.468615	0.247492	14.0482	0.0503303	0.063707	1425.79	2314.81	2352.51	1805.05	2200.22	1771.56	1573.18	1972.81
WP_259096824.1	non-heme iron oxygenase ferredoxin subunit				PFAM Rieske 2Fe-2S domain protein	ko:K00363,ko:K05710	ko00360,ko00910,ko01120,ko01220,map00360,map00910,map01120,map01220	M00530,M00545	R00787,R06782,R06783	RC00098,RC00176	br01602,ko00000,ko00001,ko00002,ko01000	-	Rieske	1887.35	0.177815	0.155982	23.6927	0.00129002	0.00237238	1575.03	2239.54	1868.29	1793.99	1467.81	2001.63	2224.52	1781.76
WP_259100973.1	histidine--tRNA ligase	histidine-tRNA ligase activity|0004821||IEA	histidyl-tRNA aminoacylation|0006427||IEA		PFAM tRNA synthetase, class II (G, H, P and S)	ko:K01892	ko00970,map00970	M00359,M00360	R03655	RC00055,RC00523	ko00000,ko00001,ko00002,ko01000,ko01007,ko03016	-	HGTP_anticodon,tRNA-synt_His	1885.35	0.0262879	0.220122	6.67836	0.463119	0.484456	1583.57	2051.66	2082.03	2048.91	2041.3	1904.74	1875.83	1612.32
WP_259097215.1	adenine phosphoribosyltransferase	adenine phosphoribosyltransferase activity|0003999||IEA	nucleoside metabolic process|0009116||IEA		Catalyzes a salvage reaction resulting in the formation of AMP, that is energically less costly than de novo synthesis	ko:K00759	ko00230,ko01100,map00230,map01100	-	R00190,R01229,R04378	RC00063	ko00000,ko00001,ko01000,ko04147	-	PRTase_2,Pribosyltran,TRSP	1883.46	0.483383	0.35605	20.2648	0.00502526	0.0080843	1372.76	2556.36	2658.85	1320.31	2294	2142.81	1199.14	1918.75
WP_259099708.1	CehA/McbA family metallohydrolase	catalytic activity|0003824||IEA											pyridoxamine-phosphate oxidase activity|0004733||IEA,FMN binding|0010181||IEA	1878.36	0.166635	0.18478	41.7286	5.86462e-07	2.10032e-06	1496.9	2686.33	2250.43	1501.86	2006.34	2092.32	1479.5	1679.86
WP_259092469.1	HD domain-containing protein													1875.41	0.179689	0.356284	10.8539	0.14512	0.167108	1762.74	1137.64	2158.33	1768.13	2321.15	1746.92	2354.78	1996.43
WP_259097134.1	reverse gyrase	DNA helicase activity|0003678||IEA,DNA topoisomerase activity|0003916||IEA,DNA topoisomerase type I (single strand cut%2C ATP-independent) activity|0003917||IEA	DNA topological change|0006265||IEA		Modifies the topological state of DNA by introducing positive supercoils in an ATP-dependent process. It cleaves transiently a single DNA strand and remains covalently bound to the 5' DNA end through a tyrosine residue. May be involved in rewinding the DNA strands in the regions of the chromosome that have opened up to allow transcription or replication	ko:K03170	-	-	-	-	ko00000,ko01000,ko03032	-	DEAD,Topoisom_bac,Toprim	1873.39	0.618234	0.39557	13.6213	0.0583426	0.0729282	1405.84	1803.8	2630.25	1113.98	2642.95	1731.09	2010.12	2157.91
WP_259097059.1	chromosome segregation protein SMC	ATP binding|0005524||IEA	chromosome segregation|0007059||IEA,chromosome condensation|0030261||IEA		Required for chromosome condensation and partitioning	ko:K03529	-	-	-	-	ko00000,ko03036	-	SMC_N,SMC_hinge	1869.82	0.667561	0.241014	24.537	0.000916309	0.00173642	1519.32	2194.58	2339.97	1366.63	2257.48	1582.36	1571.05	2413.08
WP_259095357.1	DsrE/DsrF/DrsH-like family protein				DsrE/DsrF/DrsH-like family	-	-	-	-	-	-	-	DrsE_2	1862.5	-0.919273	0.329983	82.9849	3.38628e-15	3.53309e-14	1695.31	3933.11	3304.86	2050.97	862.578	1267.07	1036.85	896.701
WP_259101064.1	50S ribosomal protein L23	structural constituent of ribosome|0003735||IEA	translation|0006412||IEA		One of the early assembly proteins it binds 23S rRNA. One of the proteins that surrounds the polypeptide exit tunnel on the outside of the ribosome. Forms the main docking site for trigger factor binding to the ribosome	ko:K02892	ko03010,map03010	M00178,M00179	-	-	br01610,ko00000,ko00001,ko00002,ko03011	-	Ribosomal_L23	1852.29	0.395535	0.197406	114.592	1.02218e-21	1.85431e-20	1586.35	2886.36	1981.71	1016.92	2125.75	2382.63	886.146	2086.72
WP_259096521.1	tetratricopeptide repeat protein													1840.35	-0.0125	0.172806	7.519	0.376909	0.400896	1708.55	1655.62	2103.75	2088.96	1937.67	1824.55	1830.79	1693.17
WP_259094133.1	methionine synthase				Catalyzes the transfer of a methyl group from 5- methyltetrahydrofolate to homocysteine resulting in methionine formation	ko:K00549	ko00270,ko00450,ko01100,ko01110,ko01230,map00270,map00450,map01100,map01110,map01230	M00017	R04405,R09365	RC00035,RC00113,RC01241	ko00000,ko00001,ko00002,ko01000	-	Meth_synt_1,Meth_synt_2	1839.93	0.225956	0.272007	15.1953	0.0335762	0.0440604	1758.09	1817.22	2045.08	1193.91	2235.45	2224.2	1589.94	2055.75
WP_259093392.1	ribonucleoside-diphosphate reductase subunit alpha	ribonucleoside-diphosphate reductase activity%2C thioredoxin disulfide as acceptor|0004748||IEA	2'-deoxyribonucleotide biosynthetic process|0009265||IEA		Ribonucleotide reductase, all-alpha domain	ko:K00525	ko00230,ko00240,ko01100,map00230,map00240,map01100	M00053	R02017,R02018,R02019,R02024	RC00613	ko00000,ko00001,ko00002,ko01000,ko03400	-	Ribonuc_red_lgC,Ribonuc_red_lgN	1839.81	-1.07367	0.433321	59.6905	1.74031e-10	1.09451e-09	2427.2	1274.23	4552.55	491.487	1867.6	1138.82	2726.91	1153.17
WP_020250189.1	pyridoxal 5'-phosphate synthase lyase subunit PdxS	catalytic activity|0003824||IEA	pyridoxal phosphate biosynthetic process|0042823||IEA		pyridoxal 5'-phosphate synthase (glutamine hydrolysing) activity	ko:K06215	ko00750,map00750	-	R07456	RC00010,RC01783,RC03043	ko00000,ko00001,ko01000	-	SOR_SNZ	1826.69	0.257018	0.172772	45.877	9.23719e-08	3.84617e-07	1538.21	2524.82	1261.6	1448.49	1729.56	1780.48	2272.47	1837.13
WP_259095335.1	GuaB3 family IMP dehydrogenase-related protein	IMP dehydrogenase activity|0003938||IEA			PFAM IMP dehydrogenase GMP reductase	ko:K00088	ko00230,ko00983,ko01100,ko01110,map00230,map00983,map01100,map01110	M00050	R01130,R08240	RC00143,RC02207	ko00000,ko00001,ko00002,ko01000,ko04147	-	IMPDH	1825.35	0.545997	0.210422	59.7338	1.70602e-10	1.0767e-09	1555.91	2916.91	1486.2	1358	2009	1814.4	1139.27	2271.28
WP_020250245.1	bifunctional oligoribonuclease/PAP phosphatase NrnA	nucleic acid binding|0003676||IEA,exonuclease activity|0004527||IEA,3'(2')%2C5'-bisphosphate nucleotidase activity|0008441||IEA			DHHA1 domain protein	ko:K06881	ko00920,ko01100,ko01120,map00920,map01100,map01120	-	R00188,R00508	RC00078	ko00000,ko00001,ko01000,ko03400	-	DHH,DHHA1	1823.3	-0.172072	0.174052	50.8527	9.82155e-09	4.83e-08	1868.12	1246.24	1361.09	2544.88	1513.74	1978.08	2159.06	1657.89
WP_259096186.1	metal ABC transporter substrate-binding protein	ATPase-coupled transmembrane transporter activity|0042626||IEA,ABC-type transporter activity|0140359||IEA			Zinc-uptake complex component A periplasmic	ko:K09815	ko02010,map02010	M00242	-	-	ko00000,ko00001,ko00002,ko02000	3.A.1.15.3,3.A.1.15.5	ZnuA	1822.91	-0.621287	0.393792	80.7834	9.53458e-15	9.32787e-14	2910.79	326.787	519.168	2189.94	2268.15	2639.11	1550.85	1892.29
WP_259094638.1	hypothetical protein													1822.82	-0.899378	0.396005	72.4916	4.62768e-13	3.95875e-12	1782.26	626.164	743.645	3337.5	873.136	2785.04	2803.12	955.416
WP_018196113.1	tetratricopeptide repeat protein													1820.26	-0.709412	0.319196	232.332	1.58606e-46	1.97438e-44	1663.34	203.067	454.353	2672.19	876.099	1848.19	5057.6	1017.24
WP_259102287.1	alpha-L-fucosidase	alpha-L-fucosidase activity|0004560||IEA	carbohydrate metabolic process|0005975||IEA	GH29	Alpha-L-fucosidase	ko:K01206	ko00511,map00511	-	-	-	ko00000,ko00001,ko01000,ko04147	-	Alpha_L_fucos,Fucosidase_C	1820.1	0.548312	0.188504	118.678	1.44379e-22	2.7432e-21	1425.88	3128.49	1865.06	1064.49	2460.71	1736.18	1023.22	2085.28
WP_259094340.1	Crp/Fnr family transcriptional regulator	DNA-binding transcription factor activity|0003700||IEA,cAMP binding|0030552||IEA	regulation of DNA-templated transcription|0006355||IEA											1819.76	-0.983749	0.307331	351.041	7.37782e-72	4.43899e-69	1395.18	140.168	406.312	2196.44	835.235	1536.3	6543.72	705.378
WP_259098219.1	phosphoenolpyruvate carboxylase	phosphoenolpyruvate carboxylase activity|0008964||IEA			Catalyzes the irreversible beta-carboxylation of phosphoenolpyruvate (PEP) to form oxaloacetate (OAA), a four- carbon dicarboxylic acid source for the tricarboxylic acid cycle	ko:K01595	ko00620,ko00680,ko00710,ko00720,ko01100,ko01120,ko01200,map00620,map00680,map00710,map00720,map01100,map01120,map01200	M00168,M00170,M00171,M00172,M00173,M00346,M00374	R00345	RC02741	ko00000,ko00001,ko00002,ko01000	-	PEPcase_2	1816.38	0.447869	0.244833	61.3471	8.12126e-11	5.35974e-10	1617.17	3140.89	2184.3	1194.57	1796.8	1448.14	1059.09	2206.18
WP_029699883.1	deoxyribonuclease IV	DNA binding|0003677||IEA,zinc ion binding|0008270||IEA,endodeoxyribonuclease activity%2C producing 5'-phosphomonoesters|0016888||IEA	DNA repair|0006281||IEA		deoxyribonuclease IV (phage-T4-induced) activity	ko:K01151	ko03410,map03410	-	-	-	ko00000,ko00001,ko01000,ko03400	-	AP_endonuc_2	1816.08	0.474343	0.307844	12.472	0.086067	0.103914	1488.65	1745.29	2609.08	1514.11	1781.73	1397.79	2176.67	2068.23
WP_259094781.1	hypothetical protein												DNA binding|0003677||IEA	1810.1	0.407042	0.230891	13.9384	0.0522872	0.066045	1693.84	1456.26	2115.83	1430.02	2019.84	1914.26	1776.98	2245.62
WP_259096606.1	malate dehydrogenase	oxidoreductase activity%2C acting on the CH-OH group of donors%2C NAD or NADP as acceptor|0016616||IEA	carbohydrate metabolic process|0005975||IEA		Catalyzes the reversible oxidation of malate to oxaloacetate	ko:K00024	ko00020,ko00270,ko00620,ko00630,ko00680,ko00710,ko00720,ko01100,ko01110,ko01120,ko01130,ko01200,map00020,map00270,map00620,map00630,map00680,map00710,map00720,map01100,map01110,map01120,map01130,map01200	M00009,M00011,M00012,M00168,M00173,M00346,M00374,M00620,M00740	R00342,R07136	RC00031	ko00000,ko00001,ko00002,ko01000	-	Ldh_1_C,Ldh_1_N	1807.32	0.909905	0.157566	58.4204	3.118e-10	1.88859e-09	1249.81	2289.05	1511.92	1629.41	1913.62	2012.54	1441.66	2347.49
WP_259097020.1	universal stress protein	adenyl ribonucleotide binding|0032559||IEA			Universal stress protein	-	-	-	-	-	-	-	Usp	1806.7	-0.11166	0.16612	52.9412	3.80762e-09	1.98634e-08	1611.56	1309.09	1484.63	2246.48	1748.07	1889.01	2547.54	1490.3
WP_259096904.1	AAA family ATPase	ATP binding|0005524||IEA,ATP hydrolysis activity|0016887||IEA			Psort location Cytoplasmic, score	ko:K03427	-	-	-	-	ko00000,ko01000,ko02048	-	AAA_15,AAA_21	1794.81	-0.0506647	0.145936	28.1206	0.000209097	0.000463093	1636.92	1599.49	1649.75	2198.12	1466.13	2091.13	1978.62	1580.42
WP_259095050.1	sodium-translocating pyrophosphatase				pump that utilizes the energy of pyrophosphate hydrolysis as the driving force for	ko:K15987	ko00190,map00190	-	-	-	ko00000,ko00001,ko01000	3.A.10.1	H_PPase	1792.83	0.0109641	0.132458	51.2113	8.34901e-09	4.13442e-08	1708	2444.77	1431.42	1590.12	1740.04	2093.34	1476.38	1720.52
WP_259101382.1	radical SAM protein	catalytic activity|0003824||IEA,iron-sulfur cluster binding|0051536||IEA			radical SAM domain protein	ko:K04070	-	-	-	-	ko00000,ko01000	-	Fer4_12,Radical_SAM	1784.67	-0.404288	0.165412	46.9329	5.75276e-08	2.46352e-07	1849.51	1291.38	1454.18	2380.75	1677.76	2104.32	1975.87	1397.79
WP_259094893.1	hypothetical protein				beta-fructofuranosidase activity	-	-	-	-	-	-	-	-	1783.64	0.603771	0.176573	31.6097	4.79721e-05	0.000120574	1396.21	2205.34	1998.69	1475.81	1891.47	1884.78	1401.86	2122.57
WP_259093371.1	hypothetical protein													1781.53	0.0408391	0.174362	18.0821	0.0116052	0.0171418	1615.06	2016.42	1628.72	1773.8	1435.29	1682.82	2273.03	1660.77
WP_259101858.1	DUF2194 domain-containing protein													1781.42	0.100451	0.152469	32.6809	3.03575e-05	7.94134e-05	1640.11	2451.78	1851.7	1550.77	1820.35	1776.75	1437.65	1758.63
WP_259092987.1	Gfo/Idh/MocA family oxidoreductase	oxidoreductase activity|0016491||IEA,oxidoreductase activity%2C acting on NAD(P)H|0016651||IEA		GH179	Oxidoreductase family, C-terminal alpha/beta domain	-	-	-	-	-	-	-	GFO_IDH_MocA,GFO_IDH_MocA_C	1781.23	0.719673	0.204031	26.2005	0.000463753	0.0009526	1358.38	1850.59	1488.37	1434.03	2257.6	2069.4	1615.99	2236.66
WP_259092011.1	4-hydroxy-tetrahydrodipicolinate synthase	4-hydroxy-tetrahydrodipicolinate synthase activity|0008840||IEA	lysine biosynthetic process via diaminopimelate|0009089||IEA		Catalyzes the condensation of (S)-aspartate-beta- semialdehyde (S)-ASA and pyruvate to 4-hydroxy- tetrahydrodipicolinate (HTPA)	ko:K01714	ko00261,ko00300,ko01100,ko01110,ko01120,ko01130,ko01230,map00261,map00300,map01100,map01110,map01120,map01130,map01230	M00016,M00525,M00526,M00527	R10147	RC03062,RC03063	ko00000,ko00001,ko00002,ko01000	-	DHDPS	1780.91	0.731676	0.281718	47.2525	4.9834e-08	2.17798e-07	1280.38	2687.24	1839.36	861.279	2372.63	1983.42	1313.79	2125.88
WP_020250119.1	hypothetical protein			GH130_2	PFAM glycosidase PH1107-related	ko:K18785,ko:K20885	-	-	R10811,R10829,R11397,R11398	RC00049,RC02748	ko00000,ko01000	-	Glyco_hydro_130	1772.77	0.737641	0.422031	24.0432	0.00111959	0.00208229	1193.06	2347.72	2019.56	729.788	2596.85	2167.21	1495.69	1989.25
WP_259094727.1	XdhC/CoxI family protein				XdhC and CoxI family	ko:K07402	-	-	-	-	ko00000	-	XdhC_C,XdhC_CoxI	1772.18	-0.0268243	0.138065	14.9746	0.0363258	0.0473244	1774.83	1753.73	1517.7	2097	1580.26	1939.32	1625.56	1740.24
WP_259094921.1	WD40 repeat domain-containing serine/threonine-protein kinase	protein serine/threonine kinase activity|0004674||IEA,ATP binding|0005524||IEA	protein phosphorylation|0006468||IEA		Protein tyrosine kinase	-	-	-	-	-	-	-	PD40,Pkinase	1771.52	0.0496928	0.191436	194.063	2.07384e-38	1.18184e-36	1477.3	595.836	1042.22	3205.53	1518.8	1767.73	2708.6	1528.82
WP_259098767.1	hypothetical protein													1768.28	-0.30535	0.238721	43.0874	3.20843e-07	1.20274e-06	1638.1	1271.45	3012.11	2373.03	1225.8	1874.68	1659.36	1325.47
WP_259095991.1	hypothetical protein												serine-type peptidase activity|0008236||IEA	1763.64	-0.959283	0.230356	34.8447	1.19615e-05	3.39207e-05	2287.3	1825.21	2244.62	2149.61	1100.37	1578.99	1685.62	1176.62
WP_269476475.1	redoxin domain-containing protein	oxidoreductase activity|0016491||IEA			PFAM alkyl hydroperoxide reductase Thiol specific antioxidant Mal allergen	-	-	-	-	-	-	-	AhpC-TSA,Redoxin	1763.47	-0.0148182	0.150827	38.6682	2.26089e-06	7.24851e-06	1648.64	2584.82	1627.05	1724.12	1490.17	1633.37	1631.11	1631.93
WP_259094912.1	VWA domain-containing protein				oxidoreductase activity	ko:K07114	-	-	-	-	ko00000,ko02000	1.A.13.2.2,1.A.13.2.3	BatA,GATase1_like,VWA,VWA_2,VWA_3	1760.04	-0.187492	0.178712	47.2815	4.91882e-08	2.16021e-07	1890.47	1156	1763.84	2556.74	1349.72	1810.27	1758.08	1659.69
WP_018195689.1	RNA-binding cell elongation regulator Jag/EloR	nucleic acid binding|0003676||IEA	regulation of unidimensional cell growth|0051510||IEA		PFAM Single-stranded nucleic acid binding R3H	ko:K06346	-	-	-	-	ko00000	-	Jag_N,KH_4,R3H	1750.75	0.0941512	0.206749	17.7401	0.0131994	0.0192059	1421.59	1868.39	1423.38	1945.86	1486.16	2139.67	2007.55	1516.1
WP_259102084.1	sulfatase-like hydrolase/transferase	sulfuric ester hydrolase activity|0008484||IEA			arylsulfatase A	ko:K01138	-	-	-	-	ko00000,ko01000	-	DUF4976,Sulfatase	1740.96	0.654659	0.197991	50.0921	1.38558e-08	6.65151e-08	1427.45	2284.68	1303	1049.76	2028.81	1758.14	1779.36	2246.44
WP_259101681.1	amidophosphoribosyltransferase	amidophosphoribosyltransferase activity|0004044||IEA	purine ribonucleotide biosynthetic process|0009152||IEA		Catalyzes the formation of phosphoribosylamine from phosphoribosylpyrophosphate (PRPP) and glutamine	ko:K00764	ko00230,ko00250,ko01100,ko01110,ko01130,map00230,map00250,map01100,map01110,map01130	M00048	R01072	RC00010,RC02724,RC02752	ko00000,ko00001,ko00002,ko01000,ko01002	-	GATase_6,GATase_7,Pribosyltran	1737.2	0.445888	0.208982	8.39299	0.299218	0.324287	1337.26	1979.14	1809.02	1682.85	1851.42	1761.24	1717.46	1821.23
WP_259097141.1	signal recognition particle protein	GTPase activity|0003924||IEA,signal sequence binding|0005048||IEA	protein secretion|0009306||IEA		Involved in targeting and insertion of nascent membrane proteins into the cytoplasmic membrane. Binds to the hydrophobic signal sequence of the ribosome-nascent chain (RNC) as it emerges from the ribosomes. The SRP-RNC complex is then targeted to the cytoplasmic membrane where it interacts with the SRP receptor FtsY	ko:K03106	ko02024,ko03060,ko03070,map02024,map03060,map03070	M00335	-	-	ko00000,ko00001,ko00002,ko01000,ko02044	3.A.5.1,3.A.5.2,3.A.5.7,3.A.5.8,3.A.5.9	SRP54,SRP54_N,SRP_SPB	1732.61	-0.0230505	0.14071	30.0007	9.493e-05	0.000223401	1638.61	1565.62	1291.67	2151.57	1599.77	1949.33	1860.38	1612.68
WP_259100284.1	cytochrome ubiquinol oxidase subunit I	electron transfer activity|0009055||IEA	aerobic electron transport chain|0019646||IEA		Cytochrome c	ko:K00425	ko00190,ko01100,ko02020,map00190,map01100,map02020	M00153	R11325	RC00061	ko00000,ko00001,ko00002,ko01000	3.D.4.3	Cyt_bd_oxida_I,Cytochrome_CBB3	1731.89	-0.0113534	0.213147	81.0288	8.49592e-15	8.35702e-14	1298.54	3325.41	1878.93	1281.69	1137.38	1774.97	1720.52	1288.54
WP_259099304.1	adenylosuccinate lyase	N6-(1%2C2-dicarboxyethyl)AMP AMP-lyase (fumarate-forming) activity|0004018||IEA	purine ribonucleotide biosynthetic process|0009152||IEA		Adenylosuccinate lyase C-terminus	ko:K01756	ko00230,ko00250,ko01100,ko01110,ko01130,map00230,map00250,map01100,map01110,map01130	M00048,M00049	R01083,R04559	RC00379,RC00444,RC00445	ko00000,ko00001,ko00002,ko01000	-	ADSL_C,Lyase_1	1719.3	-0.0814534	0.159675	81.6529	6.33612e-15	6.37142e-14	1585.05	1249.85	1174.19	1944.36	1537.11	1739.41	2784.68	1497.29
WP_259098784.1	AmmeMemoRadiSam system protein B													1718.26	0.146704	0.199688	58.638	2.82176e-10	1.7207e-09	1445.25	966.491	1345.19	2051.97	1726.36	1982.64	2506.8	1599.74
WP_259093732.1	carbon starvation protein A				Carbon starvation protein	ko:K06200	-	-	-	-	ko00000	-	CstA,CstA_5TM	1715.7	0.0533328	0.119016	340.734	1.18501e-69	6.11127e-67	1292.54	3767.38	1760.8	1254.53	1476.04	1459.73	1309.01	1340.75
WP_259094976.1	glycosyltransferase family 4 protein	glycosyltransferase activity|0016757||IEA		GT4	transferase activity, transferring glycosyl groups	-	-	-	-	-	-	-	Bac_transf,Glyco_trans_4_4,Glyco_transf_41,Glycos_transf_1,Glycos_transf_2,Methyltransf_21,Stealth_CR1,Stealth_CR2,Stealth_CR3,Stealth_CR4	1715.68	-0.0268646	0.303458	46.9397	5.73529e-08	2.45895e-07	1440.39	902.167	1209.99	1685.78	1607.82	1952.36	3308.76	1413.66
WP_259101117.1	30S ribosomal protein S4	structural constituent of ribosome|0003735||IEA,rRNA binding|0019843||IEA	translation|0006412||IEA		One of the primary rRNA binding proteins, it binds directly to 16S rRNA where it nucleates assembly of the body of the 30S subunit	ko:K02986	ko03010,map03010	M00178,M00179	-	-	br01610,ko00000,ko00001,ko00002,ko03011	-	Ribosomal_S4,S4	1714.04	0.725794	0.233542	29.2235	0.00013172	0.000301527	1339.28	2254.49	1619.99	1122.35	1935.19	1608.97	1660.03	2214.39
WP_259101241.1	AmmeMemoRadiSam system protein B				Belongs to the MEMO1 family	ko:K06990	-	-	-	-	ko00000,ko04812	-	Memo	1710.1	0.314528	0.22123	13.539	0.0600141	0.0746815	1333.19	1372.18	1857.74	1738.7	1862.85	1932.67	2026.47	1657.11
WP_259095918.1	DUF433 domain-containing protein				Protein of unknown function (DUF433)	-	-	-	-	-	-	-	DUF433	1707.95	0.069658	0.236451	10.6152	0.156307	0.178962	1652.99	1947.59	1805.66	1674.71	1882.35	1850.48	1205.76	1734.79
WP_018196063.1	sugar phosphate isomerase/epimerase	isomerase activity|0016853||IEA												1706.69	0.307271	0.326611	13.6054	0.058662	0.0732008	1260.26	2252.87	2062.37	1323.98	2080.67	1965.19	1392.19	1559.2
WP_259098200.1	beta-galactosidase	beta-galactosidase activity|0004565||IEA	carbohydrate metabolic process|0005975||IEA										DNA binding|0003677||IEA,deoxyribodipyrimidine photo-lyase activity|0003904||IEA,flavin adenine dinucleotide binding|0050660||IEA	1701.6	0.217548	0.111213	22.3389	0.00222013	0.00388872	1493.92	1768.39	2121.8	1718.35	1793.64	1569.39	1580.29	1737.77
WP_259093621.1	efflux RND transporter periplasmic adaptor subunit	transporter activity|0005215||IEA	transport|0006810||IEA		Belongs to the membrane fusion protein (MFP) (TC 8.A.1) family	ko:K02005,ko:K13888	-	M00709	-	-	ko00000,ko00002,ko02000	8.A.1	Biotin_lipoyl_2,HlyD_D23	1701.19	-0.661703	0.174174	141.518	2.44336e-27	6.83761e-26	1668.99	2180.25	3783.34	1286.27	1188.78	1365.27	1604.88	1055.02
WP_018196592.1	tetratricopeptide repeat protein													1692.32	0.390897	0.201947	93.9134	1.94028e-17	2.47506e-16	1746.07	1520.27	1379.62	1200.32	1898.45	2661.65	806.675	2290.01
WP_259102036.1	sodium-dependent transporter				neurotransmitter:sodium symporter activity	ko:K03308	-	-	-	-	ko00000	2.A.22.4,2.A.22.5	SNF	1689.17	0.207749	0.151726	60.4633	1.21989e-10	7.90628e-10	1555.21	1957.6	2512.76	1442.3	1669.7	1745.53	1102.12	1796.14
WP_259096347.1	NAD-dependent succinate-semialdehyde dehydrogenase				Aldehyde dehydrogenase family	ko:K00135	ko00250,ko00310,ko00350,ko00650,ko00760,ko01100,ko01120,map00250,map00310,map00350,map00650,map00760,map01100,map01120	M00027	R00713,R00714,R02401	RC00080	ko00000,ko00001,ko00002,ko01000	-	Aldedh	1683.94	0.95579	0.265702	30.7407	6.9407e-05	0.000168274	1192.81	2157.79	2038.73	1096.9	1921.88	1540.2	1407.14	2313.66
WP_259094271.1	metal-dependent hydrolase				Belongs to the UPF0173 family	-	-	-	-	-	-	-	Lactamase_B_2,Lactamase_B_3	1681.57	0.410045	0.175708	41.0503	7.91782e-07	2.76435e-06	1213.26	2396.33	1316.85	1578.16	1547.94	1697.11	1925.31	1611.52
WP_259092166.1	DUF58 domain-containing protein													1680.88	-0.8134	0.186099	207.201	3.42143e-41	2.47027e-39	1918.27	702.765	1055.64	1834.38	1121.93	1764.8	3562.67	1091.87
WP_259092001.1	NAD-dependent DNA ligase LigA	DNA binding|0003677||IEA,DNA ligase (NAD+) activity|0003911||IEA	DNA replication|0006260||IEA,DNA repair|0006281||IEA		DNA ligase that catalyzes the formation of phosphodiester linkages between 5'-phosphoryl and 3'-hydroxyl groups in double-stranded DNA using NAD as a coenzyme and as the energy source for the reaction. It is essential for DNA replication and repair of damaged DNA	ko:K01972	ko03030,ko03410,ko03420,ko03430,map03030,map03410,map03420,map03430	-	R00382	RC00005	ko00000,ko00001,ko01000,ko03032,ko03400	-	BRCT,DNA_ligase_OB,DNA_ligase_ZBD,DNA_ligase_aden,HHH_2,HHH_5	1680.48	-0.109164	0.145908	62.1462	5.61965e-11	3.76381e-10	1688.6	1179.12	1259.26	1772.04	1555.07	1867.28	2375.18	1565.1
WP_259100365.1	pilus assembly protein N-terminal domain-containing protein													1680.37	-0.351077	0.170764	198.682	2.18248e-39	1.31313e-37	1324.15	1110.39	1049.14	2687.82	1127.97	1554.03	3156.84	1038.04
WP_259100457.1	glycosyltransferase family 4 protein			GT4	Glycosyl transferases group 1	ko:K08256	-	-	R11702	-	ko00000,ko01000,ko01003	-	Glyco_transf_4,Glycos_transf_1	1677.81	0.0986757	0.254126	131.821	2.6165e-25	6.21419e-24	1308.49	3859.38	2535.11	888.94	1529.61	1400.9	735.127	1401.28
WP_259094521.1	SLBB domain-containing protein				polysaccharide export	ko:K01991	ko02026,map02026	-	-	-	ko00000,ko00001,ko02000	1.B.18	Poly_export,SLBB	1677.53	-0.483175	0.205904	58.234	3.39636e-10	2.03669e-09	1783.66	1062.48	1474.1	2224.89	1177.01	1723.77	2463.96	1275.7
WP_259091931.1	ParB/RepB/Spo0J family partition protein	DNA binding|0003677||IEA	cytokinesis|0000910||IEA,chromosome segregation|0007059||IEA		Belongs to the ParB family	ko:K03497	-	-	-	-	ko00000,ko03000,ko03036,ko04812	-	ParBc	1676.74	0.0932447	0.157712	4.22974	0.752968	0.760978	1582.41	1753.76	1587.82	1708.15	1489.19	1839.36	1673.16	1687.91
WP_259092544.1	hypothetical protein													1675.64	-0.426899	0.239146	21.9277	0.00261439	0.00450714	1877.41	1440.52	1208.68	2090.18	1183.95	1898.7	1989.51	1396.61
WP_259091924.1	ribonuclease Y	RNA endonuclease activity|0004521||IEA	mRNA catabolic process|0006402||IEA		Endoribonuclease that initiates mRNA decay	ko:K18682	ko03018,map03018	-	-	-	ko00000,ko00001,ko01000,ko03019	-	DUF3552,HD,KH_1	1674.82	-0.2359	0.251764	29.7411	0.000105925	0.000247342	1811.23	1223.25	1052.88	2332.7	1240.01	2066.11	1782.26	1537.83
WP_259096884.1	GxGYxYP family putative glycoside hydrolase				DNA-templated transcription, initiation	ko:K03088	-	-	-	-	ko00000,ko03021	-	AbfB,Glyco_hydro_43,Sigma70_r4_2	1669.48	0.338362	0.162226	14.6097	0.0413404	0.0532235	1357.21	1742.34	1995.26	1657.64	1760.28	1813.33	1452.61	1716
WP_259096878.1	dihydroxy-acid dehydratase	dihydroxy-acid dehydratase activity|0004160||IEA	isoleucine biosynthetic process|0009097||IEA,valine biosynthetic process|0009099||IEA		Belongs to the IlvD Edd family	ko:K01687	ko00290,ko00770,ko01100,ko01110,ko01130,ko01210,ko01230,map00290,map00770,map01100,map01110,map01130,map01210,map01230	M00019,M00570	R01209,R04441,R05070	RC00468,RC01714	ko00000,ko00001,ko00002,ko01000	-	ILVD_EDD	1669.12	0.53332	0.272591	20.1082	0.00534075	0.00854235	1296.65	2037.65	1651.49	1043.86	2150.83	1817.34	1633.62	1876.19
WP_259095106.1	ACP S-malonyltransferase	[acyl-carrier-protein] S-malonyltransferase activity|0004314||IEA	fatty acid biosynthetic process|0006633||IEA		malonyl CoA-acyl carrier protein transacylase	ko:K00645	ko00061,ko00333,ko01100,ko01130,ko01212,map00061,map00333,map01100,map01130,map01212	M00082	R01626,R11671	RC00004,RC00039,RC02727	ko00000,ko00001,ko00002,ko01000,ko01004	-	Acyl_transf_1	1667.87	1.0716	0.377082	14.1832	0.0480169	0.0609927	1134.27	1777.26	1802.48	1056.27	1972.93	1710.75	1651.56	2384.01
WP_259095971.1	hypothetical protein													1666.71	-0.94197	0.245931	178.396	4.2487e-35	1.96639e-33	1717.57	709.904	663.875	2672.81	1041.97	1365.82	3725.06	894.152
WP_259095082.1	heat-inducible transcriptional repressor HrcA		response to heat|0009408||IEA		Negative regulator of class I heat shock genes (grpE- dnaK-dnaJ and groELS operons). Prevents heat-shock induction of these operons	ko:K03705	-	-	-	-	ko00000,ko03000	-	HTH_DeoR,HrcA	1665.64	-0.0131668	0.244142	28.7274	0.000162215	0.000367606	1533.51	1589.66	1179.01	2607.41	1131.29	1710	1714.64	1519.28
WP_259100094.1	Gfo/Idh/MocA family oxidoreductase	oxidoreductase activity|0016491||IEA,oxidoreductase activity%2C acting on NAD(P)H|0016651||IEA		GH177	Glycosyl hydrolase family 109	-	-	-	-	-	-	-	GFO_IDH_MocA	1664.27	-0.0656661	0.260177	10.0992	0.183019	0.206339	1338.18	1870.48	1700.79	1980.25	1843.03	1640.91	1733.88	1278.38
WP_020250306.1	hypothetical protein												catalytic activity|0003824||IEA	1662.9	0.12077	0.174992	52.9198	3.84483e-09	2.00095e-08	1346.29	2229.67	1509.46	1429.27	1187.01	1569.58	2358.57	1463.6
WP_259101670.1	sugar phosphate isomerase/epimerase family protein	catalytic activity|0003824||IEA												1660.21	-0.216324	0.165502	9.41569	0.224173	0.248622	1628.24	1798.17	1767.43	1528.75	1657.85	1897.29	1637.68	1401.23
WP_259094685.1	HDIG domain-containing protein				7TM receptor with intracellular HD hydrolase	ko:K07037	-	-	-	-	ko00000	-	7TM-7TMR_HD,7TMR-HDED,HD	1656.46	0.626565	0.181371	47.3099	4.8566e-08	2.13809e-07	1424.8	1448.91	1394.3	2269.15	1459.7	1729.35	1171.73	2200.76
WP_259096045.1	hypothetical protein													1650.99	-0.340524	0.202611	18.7937	0.00885862	0.0134651	2028.75	1858.48	1722	1853.15	1304.49	1479.85	1267.02	1602.33
WP_259100831.1	RNA polymerase sigma factor	sigma factor activity|0016987||IEA	DNA-templated transcription initiation|0006352||IEA		Sigma-70, region 4	ko:K03088	-	-	-	-	ko00000,ko03021	-	Sigma70_r2,Sigma70_r4_2	1647.93	0.698142	0.273128	19.613	0.00646922	0.010176	1260.02	1855.6	2227.26	1091.91	1716.78	1531.27	1672.24	2044.45
WP_259095725.1	DNA polymerase III subunit delta'				DNA polymerase III	ko:K02341	ko00230,ko00240,ko01100,ko03030,ko03430,ko03440,map00230,map00240,map01100,map03030,map03430,map03440	M00260	R00375,R00376,R00377,R00378	RC02795	ko00000,ko00001,ko00002,ko01000,ko03032,ko03400	-	DNA_pol3_delta2	1636.86	0.46043	0.235456	13.6181	0.0584068	0.0729832	1323.88	1257.9	1546.38	2060.86	1685.65	1636.61	1748.43	1821.28
WP_018196429.1	AAA family ATPase													1635.73	-1.13814	0.223369	185.616	1.26789e-36	6.35707e-35	1764.97	730.133	949.84	2978.62	1081.34	1243.13	3122.75	801.643
WP_259094978.1	glycosyltransferase	glycosyltransferase activity|0016757||IEA		GT4	Glycosyl transferases group 1	ko:K16697	-	-	-	-	ko00000,ko01000,ko01003	-	Glyco_trans_1_4,Glyco_transf_4,Glycos_transf_1	1633.24	-0.0898589	0.310619	32.8069	2.87614e-05	7.58374e-05	1430.96	877.966	1412.75	1568.24	1630.63	1935.47	2790.99	1344.56
WP_259095154.1	non-lysosomal glucosylceramidase			CBM38+GH116	beta-glucosidase 2, glycosyl-hydrolase family 116 N-term	-	-	-	-	-	-	-	DUF608,Glyco_hydr_116N	1632.72	0.842519	0.337753	23.0698	0.00165757	0.00298446	1135.62	1496.77	1611.76	883.451	2350.44	1880	1899.83	2036.13
WP_259101991.1	carbamoyltransferase HypF	acylphosphatase activity|0003998||IEA	protein modification process|0036211||IEA		Belongs to the carbamoyltransferase HypF family	ko:K04656	-	-	-	-	ko00000	-	Acylphosphatase,Sua5_yciO_yrdC,zf-HYPF	1632.27	0.369234	0.284612	8.69943	0.274962	0.300337	1399.99	1166.13	1697.76	1894.8	1697.33	1640.86	1796.73	1808.07
WP_259096003.1	MG2 domain-containing protein	endopeptidase inhibitor activity|0004866||IEA												1627.88	-0.372242	0.174131	25.3086	0.000668883	0.00131161	1828.3	1210.86	1682.53	1847.9	1374.46	1638.46	1961.44	1412.8
WP_259101377.1	hypothetical protein				-	-	-	-	-	-	-	-	-	1621.54	0.0876175	0.213786	13.2798	0.0655765	0.0810723	1479.31	1794.72	2269.69	1643.73	1566.64	1509.57	1334.86	1571.55
WP_259098029.1	alpha-galactosidase			GH36										1620.95	0.47419	0.178877	40.0662	1.2226e-06	4.10566e-06	1367.65	1254.77	1181.27	1542.93	1556.53	1731.01	2266.59	1898.82
WP_259092065.1	DUF3782 domain-containing protein				protein containing a coiled-coil domain	-	-	-	-	-	-	-	DUF3782,PDDEXK_10	1619.15	-0.589702	0.174656	54.7248	1.69027e-09	9.20343e-09	1918.89	1088.02	1382.14	2303.48	1430.64	1828.53	1584.28	1275.35
WP_259095611.1	glutamate mutase L				MutL protein	ko:K00854	ko00040,ko01100,map00040,map01100	M00014	R01639	RC00002,RC00538	ko00000,ko00001,ko00002,ko01000	-	FGGY_C,FGGY_N,MutL	1617.29	-0.173753	0.1191	21.1931	0.00349467	0.00583793	1616.34	1955.28	1551.11	1427.07	1577.92	1714.41	1627.82	1433.2
WP_259100887.1	BatD family protein													1614.4	0.235271	0.178998	30.487	7.72827e-05	0.000185622	1359.38	1426.49	1248.99	2119.78	1257.57	1827.29	1835.09	1599.85
WP_259100805.1	PhoPQ-activated pathogenicity-related family protein				PhoPQ-activated pathogenicity-related protein	-	-	-	-	-	-	-	PhoPQ_related	1612.75	0.128262	0.165341	16.7837	0.0188454	0.0264201	1378.19	2039.29	1623.51	1514.55	1518.53	1791.31	1503.54	1505.27
WP_259100449.1	LmeA family phospholipid-binding protein													1607.99	0.088461	0.221819	37.9926	3.03995e-06	9.52622e-06	1511.31	2139.73	1746.6	1533.01	1409.45	2003.99	892.417	1607.42
WP_259095332.1	P-II family nitrogen regulator				Belongs to the P(II) protein family	ko:K04751	ko02020,map02020	-	-	-	ko00000,ko00001	-	P-II	1607.48	-6.02019	1.3012	61.2735	8.40142e-11	5.53451e-10	4860.94	39.4756	43.3401	4282.01	75.7604	2412.67	38.8314	74.8916
WP_259092423.1	bifunctional homocysteine S-methyltransferase/methylenetetrahydrofolate reductase				Methylenetetrahydrofolate reductase	ko:K00297,ko:K00547	ko00270,ko00670,ko00720,ko01100,ko01110,ko01120,ko01200,ko01523,map00270,map00670,map00720,map01100,map01110,map01120,map01200,map01523	M00377	R00650,R01224,R07168	RC00003,RC00035,RC00081	ko00000,ko00001,ko00002,ko01000	-	MTHFR,S-methyl_trans	1598.49	-0.121578	0.145249	11.3624	0.123573	0.144555	1721.3	1766.53	1814.75	1383.84	1632.1	1452.99	1517.85	1581.82
WP_259099534.1	DUF1257 domain-containing protein													1597.58	-2.11705	0.395576	173.099	5.57453e-34	2.31311e-32	1759.67	230.079	534.469	3198.02	582.439	1194.69	4182.82	405.7
WP_259097008.1	CehA/McbA family metallohydrolase	catalytic activity|0003824||IEA											P-type cobalt transporter activity|0032778||IEA	1596.6	0.0471253	0.122781	14.813	0.0384722	0.0497973	1505.24	1793.26	1558.82	1628.57	1581.22	1771.88	1361	1555.09
WP_259092341.1	hypothetical protein												oxidoreductase activity%2C acting on the aldehyde or oxo group of donors%2C NAD or NADP as acceptor|0016620||IEA	1591.6	-0.0103326	0.153487	17.155	0.0164235	0.0234449	1660.58	1599.46	1940.44	1436.07	1757.26	1600.51	1261.01	1648.97
WP_259099237.1	DNA mismatch repair endonuclease MutL	ATP hydrolysis activity|0016887||IEA	mismatch repair|0006298||IEA		This protein is involved in the repair of mismatches in DNA. It is required for dam-dependent methyl-directed DNA mismatch repair. May act as a molecular matchmaker , a protein that promotes the formation of a stable complex between two or more DNA-binding proteins in an ATP-dependent manner without itself being part of a final effector complex	ko:K03572	ko03430,map03430	-	-	-	ko00000,ko00001,ko03400	-	DNA_mis_repair,HATPase_c_3,MutL_C	1590.24	0.752369	0.312622	26.7658	0.000367213	0.000768932	1137.78	1913.73	2414.7	1107.01	2122.57	1492.36	1069.5	1916.51
WP_259099709.1	MBL fold metallo-hydrolase				Zn-dependent hydrolases of the	-	-	-	-	-	-	-	Lactamase_B_3	1588.13	-0.656102	0.228503	45.019	1.35606e-07	5.43328e-07	1499.79	2121.21	1710.19	1995.34	970.413	1404.63	1886.8	951.416
WP_259100691.1	hypothetical protein													1584.5	-0.193792	0.16746	35.6132	8.57501e-06	2.50451e-05	1641.7	1456.93	1043.36	1580.11	1331.67	1859.08	2063.77	1434.71
WP_259098895.1	hypothetical protein													1580.27	0.0536868	0.148729	12.9948	0.0722363	0.0883079	1510.88	1517.91	1657.84	1816.93	1513.99	1747.83	1312.25	1568.29
WP_259096489.1	acetolactate synthase small subunit	acetolactate synthase regulator activity|1990610||IEA	branched-chain amino acid biosynthetic process|0009082||IEA		Acetolactate synthase, small subunit	ko:K01653	ko00290,ko00650,ko00660,ko00770,ko01100,ko01110,ko01130,ko01210,ko01230,map00290,map00650,map00660,map00770,map01100,map01110,map01130,map01210,map01230	M00019,M00570	R00006,R00014,R00226,R03050,R04672,R04673,R08648	RC00027,RC00106,RC01192,RC02744,RC02893	ko00000,ko00001,ko00002,ko01000	-	ACT,ACT_5,ALS_ss_C	1572.7	0.145725	0.203314	10.9848	0.139284	0.160798	1484.67	2026.72	1480.53	1384.14	1492.93	1615.08	1397.92	1642.3
WP_259099869.1	Gfo/Idh/MocA family oxidoreductase	oxidoreductase activity|0016491||IEA,oxidoreductase activity%2C acting on NAD(P)H|0016651||IEA			Oxidoreductase family, C-terminal alpha/beta domain	ko:K00010,ko:K16044	ko00521,ko00562,ko01100,ko01120,ko01130,map00521,map00562,map01100,map01120,map01130	-	R01183,R09951,R09954	RC00182	ko00000,ko00001,ko01000	-	GFO_IDH_MocA,GFO_IDH_MocA_C	1571.47	0.278839	0.206343	16.4777	0.0210933	0.0291797	1370.75	1816.21	1326.1	1519.16	1737.92	1898.87	1214.19	1662.23
WP_259094708.1	helicase-related protein				SNF2 family N-terminal domain	-	-	-	-	-	-	-	Helicase_C,SNF2_N	1571.34	0.631662	0.154361	131.504	3.04882e-25	7.19361e-24	1102.88	2817.78	1623.06	1102.63	1757.29	1345.93	1191.53	1708.81
WP_259096908.1	excinuclease ABC subunit UvrB	DNA binding|0003677||IEA,protein binding|0005515||IEA,ATP binding|0005524||IEA,hydrolase activity|0016787||IEA,ATP hydrolysis activity|0016887||IEA	nucleotide-excision repair|0006289||IEA		damaged site, the DNA wraps around one UvrB monomer. DNA wrap is dependent on ATP binding by UvrB and probably causes local melting of the DNA helix, facilitating insertion of UvrB beta-hairpin between the DNA strands. Then UvrB probes one DNA strand for the presence of a lesion. If a lesion is found the UvrA subunits dissociate and the UvrB-DNA preincision complex is formed. This complex is subs…	ko:K03702	ko03420,map03420	-	-	-	ko00000,ko00001,ko03400	-	Helicase_C,ResIII,UVR,UvrB	1557.76	0.123784	0.19477	13.1196	0.0692477	0.0850576	1394.38	1789.8	1674.43	1550.74	1739.7	1704.33	1188.84	1519.38
WP_259093934.1	alanine--glyoxylate aminotransferase family protein				Aminotransferase class-V	ko:K00830	ko00250,ko00260,ko00630,ko00680,ko01100,ko01110,ko01120,ko01130,ko01200,ko04146,map00250,map00260,map00630,map00680,map01100,map01110,map01120,map01130,map01200,map04146	M00346,M00532	R00369,R00372,R00585,R00588	RC00006,RC00008,RC00018	ko00000,ko00001,ko00002,ko01000,ko01007	-	Aminotran_5	1555.02	0.671911	0.268599	73.3741	3.06542e-13	2.67946e-12	1308.33	2621.95	1087.87	752.26	1899.72	1778.86	866.082	2084.29
WP_259095031.1	carbohydrate-binding family 9-like protein												thiamine-phosphate kinase activity|0009030||IEA	1553.86	0.055126	0.154927	12.6233	0.0818354	0.0992028	1393.17	1356.74	1655.99	1477.57	1729.16	1774.75	1688.67	1447.34
WP_259093810.1	ribosome-associated translation inhibitor RaiA	translation regulator activity|0045182||IEA	translational attenuation|0009386||IEA		Required for dimerization of active 70S ribosomes into 100S ribosomes in stationary phase	ko:K05808	-	-	-	-	ko00000,ko03009	-	Ribosom_S30AE_C,Ribosomal_S30AE	1550.16	-0.0165347	0.194936	6.57393	0.474546	0.495689	1651.61	1717.62	1223.02	1442.11	1539.55	1599.26	1483.14	1632.35
WP_259094970.1	UDP-glucose/GDP-mannose dehydrogenase family protein	oxidoreductase activity%2C acting on the CH-OH group of donors%2C NAD or NADP as acceptor|0016616||IEA			Belongs to the UDP-glucose GDP-mannose dehydrogenase family	ko:K00012,ko:K00066	ko00040,ko00051,ko00053,ko00520,ko01100,ko02020,map00040,map00051,map00053,map00520,map01100,map02020	M00014,M00129,M00361,M00362	R00286,R00880	RC00291	ko00000,ko00001,ko00002,ko01000	-	UDPG_MGDP_dh,UDPG_MGDP_dh_C,UDPG_MGDP_dh_N	1548.89	-0.170472	0.232125	44.0877	2.05512e-07	7.91781e-07	1480.04	824.792	1444.1	1643.74	1674.84	1660.08	2355.83	1314.78
WP_259096743.1	aminomethyl-transferring glycine dehydrogenase subunit GcvPA	glycine dehydrogenase (decarboxylating) activity|0004375||IEA	glycine catabolic process|0006546||IEA		The glycine cleavage system catalyzes the degradation of glycine. The P protein binds the alpha-amino group of glycine through its pyridoxal phosphate cofactor	ko:K00281,ko:K00282	ko00260,ko00630,ko01100,ko01110,ko01130,ko01200,map00260,map00630,map01100,map01110,map01130,map01200	M00532	R01221,R03425	RC00022,RC00929,RC02834,RC02880	ko00000,ko00001,ko00002,ko01000	-	GDC-P	1548.13	0.031474	0.199579	22.8851	0.00178494	0.00318834	1468.72	1615.87	2294.02	1377.37	1644.28	1611.09	1153.07	1501.27
WP_259091857.1	UDP-N-acetylglucosamine 1-carboxyvinyltransferase	UDP-N-acetylglucosamine 1-carboxyvinyltransferase activity|0008760||IEA	peptidoglycan biosynthetic process|0009252||IEA		Cell wall formation. Adds enolpyruvyl to UDP-N- acetylglucosamine	ko:K00790	ko00520,ko00550,ko01100,map00520,map00550,map01100	-	R00660	RC00350	ko00000,ko00001,ko01000,ko01011	-	EPSP_synthase	1542.39	0.0333563	0.145838	35.5623	8.76613e-06	2.55359e-05	1592	1829.8	1013.5	1311.95	1428.79	1758.74	1561.05	1629.17
WP_259095084.1	YebC/PmpR family DNA-binding transcriptional regulator				Transcriptional regulator	-	-	-	-	-	-	-	Transcrip_reg	1542.05	-0.23631	0.130894	44.5772	1.65188e-07	6.49597e-07	1491.04	1601.04	1314.34	1631.37	1274.04	1508.65	2086.16	1264.52
WP_259094670.1	DUF2092 domain-containing protein													1541.15	-0.554473	0.175067	23.4971	0.00139592	0.00255152	1959.36	1517.06	1948.41	1493.55	1203.52	1374.35	1522.48	1333.7
WP_259095566.1	POTRA domain-containing protein													1540.45	0.306099	0.235181	21.8821	0.00266206	0.0045784	1488.9	1776.21	1093.95	1557.69	1449.22	1874.93	1062.24	1841.23
WP_259096856.1	type III-B CRISPR-associated protein Cas10/Cmr2	molecular_function|0003674||IEA	maintenance of CRISPR repeat elements|0043571||IEA											1538.95	0.140294	0.147817	37.4203	3.90443e-06	1.20367e-05	1257.49	1722.04	1356.56	1667.95	1438.11	1329.13	2060.81	1385.11
WP_259096759.1	ATP-binding protein	ATP binding|0005524||IEA			Belongs to the AAA ATPase family	ko:K13339	ko04146,map04146	-	-	-	ko00000,ko00001,ko04131	3.A.20.1	AAA	1537.55	0.599935	0.263277	7.90666	0.340896	0.365608	1213.74	1478.28	1758.56	1491.69	1621.19	1323.07	1675.76	1839.66
WP_259099866.1	DUF4175 family protein													1536.28	-0.221512	0.161584	56.9757	6.04459e-10	3.48578e-09	1753.82	955.204	1368.69	2115.42	1262.89	1588.73	1594.27	1504.2
WP_259101872.1	DNA-3-methyladenine glycosylase				Methylpurine-DNA glycosylase (MPG)	ko:K03652	ko03410,map03410	-	-	-	ko00000,ko00001,ko01000,ko03400	-	Pur_DNA_glyco	1533.08	-0.483528	0.214048	101.901	4.36669e-19	6.33082e-18	1430.01	711.053	1093.01	2407.15	1281.16	1988.74	2100.2	1022.63
WP_259101305.1	hypothetical protein													1533.06	-0.425455	0.189589	74.7437	1.61665e-13	1.43394e-12	1459.02	1528.38	967.702	1679.97	1119.45	1478.44	2618.57	1086.64
WP_259098624.1	phenylalanine--tRNA ligase subunit alpha	phenylalanine-tRNA ligase activity|0004826||IEA	phenylalanyl-tRNA aminoacylation|0006432||IEA		Belongs to the class-II aminoacyl-tRNA synthetase family. Phe-tRNA synthetase alpha subunit type 1 subfamily	ko:K01889	ko00970,map00970	M00359,M00360	R03660	RC00055,RC00523	ko00000,ko00001,ko00002,ko01000,ko01007,ko03016	-	Phe_tRNA-synt_N,tRNA-synt_2d	1532.79	0.657113	0.200118	27.2179	0.000304481	0.000649248	1301.97	1687.37	1485.21	1095.94	1820.52	1522.28	1376.03	2053.05
WP_259096657.1	corrinoid protein				cobalamin binding	ko:K00548	ko00270,ko00450,ko00670,ko01100,ko01110,ko01230,map00270,map00450,map00670,map01100,map01110,map01230	M00017	R00946,R09365	RC00035,RC00113,RC01241	ko00000,ko00001,ko00002,ko01000	-	B12-binding,B12-binding_2,URO-D	1529	1.82899	0.193754	271.46	7.43738e-55	1.67806e-52	674.763	731.626	561.367	2038.4	2318.18	2540.66	911.181	2396.3
WP_259101048.1	rhamnulokinase family protein	ATP binding|0005524||IEA,carbohydrate kinase activity|0019200||IEA			COG1070 Sugar (pentulose and hexulose)	ko:K00848	ko00040,ko00051,ko01120,map00040,map00051,map01120	-	R01902,R03014	RC00002,RC00017	ko00000,ko00001,ko01000	-	FGGY_C,FGGY_N	1528.53	0.20003	0.132815	11.2425	0.128386	0.149749	1355.75	1694.22	1318.3	1475.47	1686.02	1556.63	1566.95	1557.33
WP_020250147.1	Glu/Leu/Phe/Val dehydrogenase dimerization domain-containing protein	nucleotide binding|0000166||IEA,oxidoreductase activity|0016491||IEA			Belongs to the Glu Leu Phe Val dehydrogenases family	ko:K00261	ko00220,ko00250,ko00471,ko00910,ko01100,ko01200,ko04217,ko04964,map00220,map00250,map00471,map00910,map01100,map01200,map04217,map04964	M00740	R00243,R00248	RC00006,RC02799	ko00000,ko00001,ko00002,ko01000,ko04147	-	ELFV_dehydrog,ELFV_dehydrog_N	1525.62	0.27028	0.160015	46.882	5.88585e-08	2.51455e-07	1333.82	2188.85	1650.78	1093.13	1449.82	1337.64	1559.07	1608.32
WP_259101457.1	hypothetical protein												molybdenum ion binding|0030151||IEA,metal ion binding|0046872||IEA	1522.72	-0.692587	0.280084	14.7085	0.0399226	0.0515268	2143.38	1702.33	1543.94	1377.96	1110.72	1232.38	1614.52	1326.24
WP_259095448.1	xanthine dehydrogenase family protein subunit M				CO dehydrogenase flavoprotein C-terminal domain	ko:K03519	-	-	R11168	RC02800	ko00000,ko01000	-	CO_deh_flav_C,FAD_binding_5	1519.47	-0.740165	0.24377	85.6295	9.74305e-16	1.06261e-14	1398.61	2318.32	2082.31	1077.61	1168.82	905.533	2438.15	837.143
WP_259101684.1	4-hydroxy-3-methylbut-2-enyl diphosphate reductase	metal ion binding|0046872||IEA,4-hydroxy-3-methylbut-2-en-1-yl diphosphate reductase activity|0051745||IEA	isopentenyl diphosphate biosynthetic process%2C methylerythritol 4-phosphate pathway|0019288||IEA,dimethylallyl diphosphate biosynthetic process|0050992||IEA		Catalyzes the conversion of 1-hydroxy-2-methyl-2-(E)- butenyl 4-diphosphate (HMBPP) into a mixture of isopentenyl diphosphate (IPP) and dimethylallyl diphosphate (DMAPP). Acts in the terminal step of the DOXP MEP pathway for isoprenoid precursor biosynthesis	ko:K03527	ko00900,ko01100,ko01110,ko01130,map00900,map01100,map01110,map01130	M00096	R05884,R08210	RC01137,RC01487	ko00000,ko00001,ko00002,ko01000	-	LYTB	1517.93	0.062937	0.246292	6.13652	0.523903	0.543474	1353.43	1461.03	1601.84	1681.24	1316.42	1847.03	1429.44	1413.8
WP_259099404.1	GH1 family beta-glucosidase	beta-glucosidase activity|0008422||IEA	cellulose catabolic process|0030245||IEA	GH1	Belongs to the glycosyl hydrolase 1 family	ko:K05350	ko00460,ko00500,ko00940,ko01100,ko01110,map00460,map00500,map00940,map01100,map01110	-	R00026,R02558,R02887,R02985,R03527,R04949,R04998,R10035,R10039,R10040	RC00049,RC00059,RC00171,RC00262,RC00397,RC00451,RC00714,RC00746,RC01248	ko00000,ko00001,ko01000	-	Glyco_hydro_1	1517.66	0.786657	0.307099	23.9452	0.00116492	0.00215991	1077.1	1949.31	1481.33	916.394	2194.9	1416.56	1461.64	1857.65
WP_259092331.1	imidazoleglycerol-phosphate dehydratase HisB				Imidazoleglycerol-phosphate dehydratase	ko:K01693	ko00340,ko01100,ko01110,ko01230,map00340,map01100,map01110,map01230	M00026	R03457	RC00932	ko00000,ko00001,ko00002,ko01000	-	IGPD	1516.4	0.234538	0.213052	11.3972	0.122208	0.143098	1353.21	1152.64	1391.3	1655.24	1674.46	1584.62	1738.73	1591.97
WP_029700082.1	response regulator		phosphorelay signal transduction system|0000160||IEA		Helix-turn-helix domain	-	-	-	-	-	-	-	HTH_17,Response_reg	1515.6	-0.79759	0.209121	33.5484	2.09202e-05	5.64439e-05	1936.9	1481.55	1083.88	1914.43	1114.37	1474.93	1726.63	1114.46
WP_259093276.1	glycosyltransferase N-terminal domain-containing protein			GT30	3-Deoxy-D-manno-octulosonic-acid transferase (kdotransferase)	ko:K02527	ko00540,ko01100,map00540,map01100	M00060,M00080	R04658,R05074,R09763	RC00009,RC00077,RC00247	ko00000,ko00001,ko00002,ko01000,ko01003,ko01005	-	Glycos_transf_1,Glycos_transf_N	1509.65	-0.636458	0.152811	126.6	3.2237e-24	7.05307e-23	1764.82	826.188	1154.19	2157.06	1282.09	1493.43	2069.42	1135.66
WP_259096755.1	phosphate signaling complex protein PhoU	DNA-binding transcription factor activity|0003700||IEA	regulation of transport|0051049||IEA		Plays a role in the regulation of phosphate uptake	ko:K02039	-	-	-	-	ko00000	-	PhoU	1508.54	0.11523	0.131435	78.3903	2.93175e-14	2.77058e-13	1290.58	1203.67	1212.63	1999.24	1129.81	1647.78	1962.68	1397.07
WP_259102195.1	phosphoribosylaminoimidazolesuccinocarboxamide synthase	phosphoribosylaminoimidazolesuccinocarboxamide synthase activity|0004639||IEA	purine nucleotide biosynthetic process|0006164||IEA		SAICAR synthetase	ko:K01923	ko00230,ko01100,ko01110,ko01130,map00230,map01100,map01110,map01130	M00048	R04591	RC00064,RC00162	ko00000,ko00001,ko00002,ko01000	-	SAICAR_synt	1505.43	0.588128	0.1914	20.2631	0.00502848	0.00808588	1227.16	1351.1	1214.63	1408.25	1417.99	1612.57	1840.98	1844.69
WP_259101779.1	glucose-1-phosphate adenylyltransferase	glucose-1-phosphate adenylyltransferase activity|0008878||IEA	glycogen biosynthetic process|0005978||IEA		Catalyzes the synthesis of ADP-glucose, a sugar donor used in elongation reactions on alpha-glucans	ko:K00975	ko00500,ko00520,ko01100,ko01110,ko02026,map00500,map00520,map01100,map01110,map02026	M00565	R00948	RC00002	ko00000,ko00001,ko00002,ko01000	-	NTP_transferase	1501.91	0.0906654	0.191389	25.1456	0.000714987	0.00139068	1236.34	1312.34	1730.95	1915.17	1264.39	1381.16	1855.97	1316.13
WP_259101465.1	CHAT domain-containing protein				SPTR Tetratricopeptide TPR_2 repeat protein	-	-	-	-	-	-	-	CHAT,TPR_12,TPR_7	1501.56	-0.702955	0.290018	14.5833	0.0417281	0.0536653	1879.72	1814.81	1214.33	1414.16	1008.38	1648.02	1618.19	1154.75
WP_259094518.1	response regulator transcription factor	DNA binding|0003677||IEA	phosphorelay signal transduction system|0000160||IEA,regulation of DNA-templated transcription|0006355||IEA		Two component transcriptional regulator, LuxR family	ko:K07693	ko02020,map02020	M00479	-	-	ko00000,ko00001,ko00002,ko02022	-	GerE,Response_reg	1498.56	-0.561838	0.222471	48.1847	3.27657e-08	1.47855e-07	1592.98	882.577	1705.65	2164.25	1146.29	1669.97	1699.65	1078.75
WP_018195540.1	DNA-directed RNA polymerase subunit omega	DNA binding|0003677||IEA,DNA-directed 5'-3' RNA polymerase activity|0003899||IEA												1498.16	-0.3771	0.187675	41.1438	7.59722e-07	2.66013e-06	1682.21	2236.07	1388	1574.52	1348.74	1295.64	1077.78	1295.82
WP_259094033.1	TatD family hydrolase	hydrolase activity%2C acting on ester bonds|0016788||IEA			TatD related DNase	ko:K03424	-	-	-	-	ko00000,ko01000	-	TatD_DNase	1495.08	0.632774	0.245728	58.2996	3.29569e-10	1.98954e-09	1495.81	2005.91	1307.59	905.089	1618.34	1469.16	817.733	2319.59
WP_259101123.1	tRNA pseudouridine(38-40) synthase TruA	pseudouridine synthase activity|0009982||IEA	tRNA modification|0006400||IEA		Formation of pseudouridine at positions 38, 39 and 40 in the anticodon stem and loop of transfer RNAs	ko:K06173	-	-	-	-	ko00000,ko01000,ko03016	-	PseudoU_synth_1	1493.23	0.522248	0.231584	27.055	0.000325771	0.000690566	1195.62	2036.21	1778.6	1155.24	1790.77	1271.47	1195.6	1716.63
WP_259099625.1	ATP-binding protein				transcriptional regulator	-	-	-	-	-	-	-	HATPase_c_4	1489.07	0.435221	0.175146	10.7805	0.148483	0.170817	1208.2	1308.67	1547.28	1584.95	1482.36	1538.81	1626.54	1632.92
WP_259099631.1	methylcobamide--CoM methyltransferase				Catalyzes the transfer of a methyl group from 5- methyltetrahydrofolate to homocysteine resulting in methionine formation	ko:K00549	ko00270,ko00450,ko01100,ko01110,ko01230,map00270,map00450,map01100,map01110,map01230	M00017	R04405,R09365	RC00035,RC00113,RC01241	ko00000,ko00001,ko00002,ko01000	-	Meth_synt_1,Meth_synt_2	1487.8	0.178489	0.267514	10.153	0.180066	0.203566	1282	1279.15	1264.22	1343.42	1790.33	1582.13	1936.89	1450.56
WP_259095557.1	6-carboxytetrahydropterin synthase	metal ion binding|0046872||IEA,6-carboxy-5%2C6%2C7%2C8-tetrahydropterin synthase activity|0070497||IEA	queuosine biosynthetic process|0008616||IEA		6-pyruvoyl tetrahydropterin synthase	ko:K01737	ko00790,ko01100,map00790,map01100	M00842,M00843	R04286,R09959	RC01117,RC02846,RC02847	ko00000,ko00001,ko00002,ko01000,ko03016	-	PTPS	1487.51	0.461169	0.199484	30.5076	7.66143e-05	0.000184262	1302.21	1983.19	1477.42	1117.08	1086.85	1380.08	1623.66	1792.66
WP_259093369.1	tetratricopeptide repeat protein	protein binding|0005515||IEA												1484.22	-0.225985	0.202967	18.5092	0.00987192	0.0148366	1420.07	1608.76	1318.44	1789.49	1060.93	1554.56	1710.9	1214.24
WP_259094385.1	hypothetical protein													1483.93	0.0807008	0.158962	29.3287	0.00012602	0.00028995	1280.89	1201.58	1336.08	1519.86	1525.94	1646.81	1970.8	1354.19
WP_259099617.1	helicase-related protein				PFAM DNA RNA helicase, C-terminal	-	-	-	-	-	-	-	DUF3883,Helicase_C,SNF2_N	1483.07	0.617459	0.156252	38.6056	2.32393e-06	7.4374e-06	1254.81	1455.52	1596.53	1469.06	1689.94	1536.64	1044.92	1923.87
WP_259091888.1	BatD family protein													1482.15	-0.0731218	0.152526	60.5684	1.16229e-10	7.57901e-10	1445.38	926.804	1786.99	1981.9	1280.25	1436.37	1660.16	1373.66
WP_259092397.1	DNA mismatch repair protein MutS	ATP binding|0005524||IEA,mismatched DNA binding|0030983||IEA	mismatch repair|0006298||IEA		that it carries out the mismatch recognition step. This protein has a weak ATPase activity	ko:K03555	ko03430,map03430	-	-	-	ko00000,ko00001,ko03400	-	MutS_I,MutS_II,MutS_III,MutS_IV,MutS_V	1480.93	0.421502	0.220602	6.51081	0.481523	0.502228	1248.13	1277.46	1633.94	1543.39	1531.54	1447.38	1561.57	1671.89
WP_259097684.1	TIGR01777 family oxidoreductase	catalytic activity|0003824||IEA			Domain of unknown function (DUF1731)	ko:K07071	-	-	-	-	ko00000	-	DUF1731,Epimerase	1478.82	0.249238	0.154371	58.0466	3.70102e-10	2.21203e-09	1330.73	2194.4	1179.82	1071.31	1339.94	1394.69	1592.52	1581.19
WP_259096448.1	LacI family DNA-binding transcriptional regulator	transcription cis-regulatory region binding|0000976||IEA,DNA-binding transcription factor activity|0003700||IEA,sequence-specific DNA binding|0043565||IEA	DNA-templated transcription|0006351||IEA,regulation of DNA-templated transcription|0006355||IEA,negative regulation of DNA-templated transcription|0045892||IEA		Periplasmic binding protein LacI transcriptional regulator	ko:K01775	ko00473,ko01100,ko01502,map00473,map01100,map01502	-	R00401	RC00285	ko00000,ko00001,ko01000,ko01011	-	LacI,Peripla_BP_3	1477.78	-1.85238	0.64925	136.113	3.31092e-26	8.35833e-25	481.127	96.623	985.636	631.117	126.204	4510.05	4243.69	133.21
WP_259102318.1	ATP synthase F1 subunit gamma	proton-transporting ATP synthase activity%2C rotational mechanism|0046933||IEA	proton motive force-driven ATP synthesis|0015986||IEA		Produces ATP from ADP in the presence of a proton gradient across the membrane. The gamma chain is believed to be important in regulating ATPase activity and the flow of protons through the CF(0) complex	ko:K02115	ko00190,ko00195,ko01100,map00190,map00195,map01100	M00157	-	-	ko00000,ko00001,ko00002,ko00194	3.A.2.1	ATP-synt	1476.56	0.55313	0.353525	14.5626	0.0420333	0.0540193	1126.86	1752.77	2189.25	1070.31	1890.69	1374.39	1130.55	1653.3
WP_259096272.1	hypothetical protein												hydroxymethylbilane synthase activity|0004418||IEA	1476.07	-0.396152	0.267113	41.7148	5.90067e-07	2.11114e-06	1348.62	1688.55	950.863	1355.04	990.582	1579.92	2533.3	1024.76
WP_302898712.1	DNA polymerase III subunit alpha	3'-5' exonuclease activity|0008408||IEA	DNA replication|0006260||IEA		DNA polymerase	ko:K02337	ko00230,ko00240,ko01100,ko03030,ko03430,ko03440,map00230,map00240,map01100,map03030,map03430,map03440	M00260	R00375,R00376,R00377,R00378	RC02795	ko00000,ko00001,ko00002,ko01000,ko03032,ko03400	-	DNA_pol3_alpha,HHH_6,PHP,tRNA_anti-codon	1475.61	0.734654	0.230179	64.2025	2.17467e-11	1.53631e-10	1018.57	2318.58	1647.8	1282.01	2029.1	1257.61	797.835	1695.29
WP_259096536.1	regulatory iron-sulfur-containing complex subunit RicT				domain protein	-	-	-	-	-	-	-	PSP1	1473.48	0.280882	0.1287	59.4709	1.92507e-10	1.20442e-09	1289.57	1133.02	1114.47	1920.28	1356.6	1722.38	1526.44	1566.45
WP_259096382.1	helix-hairpin-helix domain-containing protein				TIGRFAM Competence protein ComEA, helix-hairpin-helix	ko:K02237	-	M00429	-	-	ko00000,ko00002,ko02044	3.A.11.1,3.A.11.2	HHH_3,SLBB	1471.8	-0.134915	0.198856	11.98	0.101218	0.120434	1579.39	1320.38	1638.89	1439.06	1291.88	1826.19	1235.91	1438.42
WP_259095510.1	serine O-acetyltransferase	serine O-acetyltransferase activity|0009001||IEA	cysteine biosynthetic process from serine|0006535||IEA		serine acetyltransferase	ko:K00640	ko00270,ko00920,ko01100,ko01110,ko01120,ko01200,ko01230,ko05111,map00270,map00920,map01100,map01110,map01120,map01200,map01230,map05111	M00021	R00586	RC00004,RC00041	ko00000,ko00001,ko00002,ko01000	-	Hexapep,SATase_N	1471.69	-0.0683707	0.154477	28.0023	0.000219679	0.000484152	1426.64	1972.8	1239.45	1242.45	1309.9	1549.72	1540.42	1360.8
WP_018196449.1	KaiC domain-containing protein				PFAM Circadian clock protein KaiC	-	-	-	-	-	-	-	ATPase	1468.4	-0.774902	0.210914	37.7657	3.35724e-06	1.0439e-05	1848.68	1059.14	1175.21	1357.65	1359.62	1902.5	1830.42	1079.96
WP_259100530.1	glycoside hydrolase family 78 protein			CBM67+CBM67+GH78	Bacterial alpha-L-rhamnosidase 6 hairpin glycosidase domain	ko:K05989	-	-	-	-	ko00000,ko01000	-	Bac_rhamnosid,Bac_rhamnosid6H,Bac_rhamnosid_C,Bac_rhamnosid_N,NPCBM_assoc	1466.39	0.158324	0.153407	45.0695	1.32577e-07	5.32373e-07	1450.41	1718.46	1482.94	1105.07	1880.64	1567.38	1051.09	1618.76
WP_259099601.1	acetylxylan esterase			CE19	Acetyl xylan esterase	-	-	-	-	-	-	-	AXE1	1464.61	0.127388	0.19424	5.3406	0.618473	0.633746	1255.54	1430.54	1510.2	1634	1405.04	1561.62	1544.27	1371.03
WP_259094008.1	alkaline phosphatase family protein				Metalloenzyme superfamily	-	-	-	-	-	-	-	Phosphodiest	1464.38	-0.315997	0.146509	11.7878	0.107757	0.127417	1718	1450.49	1579.24	1256.57	1446.88	1531.24	1384.87	1380.21
WP_259095481.1	glycoside hydrolase family 2 protein			GH2	beta-galactosidase activity	ko:K01192	ko00511,ko04142,map00511,map04142	-	-	-	ko00000,ko00001,ko01000	-	Glyco_hydro_2,Glyco_hydro_2_C,Glyco_hydro_2_N	1458.77	0.762305	0.361536	18.063	0.0116892	0.0172518	1002.68	1558.83	1522.6	795.665	1884.33	1521.55	1847.04	1700.58
WP_259096405.1	radical SAM protein	catalytic activity|0003824||IEA,iron-sulfur cluster binding|0051536||IEA			SMART Elongator protein 3 MiaB NifB	-	-	-	-	-	-	-	HHH_3,Radical_SAM	1458.26	-0.109719	0.146272	15.7802	0.0272022	0.036492	1508.92	1422.84	1405.04	1810.9	1206.19	1362.07	1449.91	1398.41
WP_259101741.1	CehA/McbA family metallohydrolase	catalytic activity|0003824||IEA			metal-dependent phosphoesterases (PHP family)	-	-	-	-	-	-	-	ABC_transp_aux,CarboxypepD_reg,DDOST_48kD	1457.41	0.601586	0.302859	26.4983	0.000410148	0.000849474	1082.2	1830.21	1791.51	812.979	1293.07	1297.64	1965.72	1642.5
WP_259099627.1	DUF1156 domain-containing protein				Protein conserved in bacteria	-	-	-	-	-	-	-	DUF1156	1453.95	0.314338	0.222086	11.989	0.10092	0.120159	1180.54	1665.2	1716.3	1158.87	1649.39	1407.58	1538.74	1467.56
WP_259095430.1	UDP-N-acetylmuramoyl-L-alanyl-D-glutamate--2%2C6-diaminopimelate ligase	ATP binding|0005524||IEA,ligase activity|0016874||IEA	regulation of cell shape|0008360||IEA,biosynthetic process|0009058||IEA,cell division|0051301||IEA		Catalyzes the addition of meso-diaminopimelic acid to the nucleotide precursor UDP-N-acetylmuramoyl-L-alanyl-D-glutamate (UMAG) in the biosynthesis of bacterial cell-wall peptidoglycan	ko:K01928	ko00300,ko00550,map00300,map00550	-	R02788	RC00064,RC00090	ko00000,ko00001,ko01000,ko01011	-	Mur_ligase,Mur_ligase_C,Mur_ligase_M	1453.78	0.354415	0.233902	10.583	0.157873	0.180584	1177.75	1134.44	1441.02	1639.63	1674.73	1558.96	1567.99	1505.12
WP_259102079.1	DUF1080 domain-containing protein				Domain of Unknown Function (DUF1080)	-	-	-	-	-	-	-	DUF1080	1453	0.697662	0.329259	29.9159	9.83938e-05	0.00023095	963.674	2139.21	1874.01	886.421	1874.68	1628.08	975.925	1562.86
WP_259094191.1	hypothetical protein													1452.66	-1.82487	0.241602	119.713	8.79244e-23	1.71571e-21	2258.52	806.995	1032.9	991.839	1237.35	2341.09	2103.59	637.303
WP_259102397.1	DUF1156 domain-containing protein				Protein of unknown function (DUF1156)	ko:K07445	-	-	-	-	ko00000	-	DUF1156	1450.58	0.0828735	0.152877	24.0972	0.0010954	0.00204466	1300.08	1683.72	1152.33	1551.33	1377.51	1267.84	1770.72	1377.33
WP_259101254.1	prepilin-type N-terminal cleavage/methylation domain-containing protein				Required for transformation and DNA binding	ko:K02245,ko:K02456	ko03070,ko05111,map03070,map05111	M00331,M00429	-	-	ko00000,ko00001,ko00002,ko02044	3.A.15	N_methyl	1449.52	-0.62689	0.23057	35.6325	8.50326e-06	2.48557e-05	1522.55	2009.59	1539.33	1707.53	1089.01	1627.09	1024.81	986.041
WP_259100856.1	DUF2092 domain-containing protein													1446.37	-0.530406	0.153073	22.6294	0.00197716	0.00349366	1695.48	1458.9	1745.49	1255.58	1258.92	1524.46	1495.8	1173.51
WP_259095246.1	M48 family metallopeptidase				PFAM Peptidase family M48	-	-	-	-	-	-	-	Peptidase_M48	1446.08	-0.148228	0.163474	13.6059	0.0586518	0.0732008	1547.66	1595.43	1573.2	1551.01	1248.63	1480.49	1151.44	1397.34
WP_259100803.1	M20/M25/M40 family metallo-hydrolase	hydrolase activity|0016787||IEA			Peptidase T-like protein	ko:K01258	-	-	-	-	ko00000,ko01000,ko01002	-	M20_dimer,Peptidase_M20,Peptidase_M28	1446.01	-0.354904	0.152558	20.4542	0.00466787	0.00758919	1546.01	1738.14	1230.82	1290.09	1418.81	1428.87	1626.11	1208.46
WP_259100608.1	glycoside hydrolase family 127 protein			GH127	Beta-L-arabinofuranosidase, GH127	ko:K09955	-	-	-	-	ko00000	-	Glyco_hydro_127	1443.15	-0.0824693	0.128462	9.67044	0.208031	0.231931	1487.76	1251.53	1321.91	1472.34	1575.57	1566.83	1468.09	1404.92
WP_259095580.1	glutamyl-tRNA reductase	glutamyl-tRNA reductase activity|0008883||IEA	porphyrin-containing compound biosynthetic process|0006779||IEA		Catalyzes the NADPH-dependent reduction of glutamyl- tRNA(Glu) to glutamate 1-semialdehyde (GSA)	ko:K02492	ko00860,ko01100,ko01110,ko01120,map00860,map01100,map01110,map01120	M00121	R04109	RC00055,RC00149	ko00000,ko00001,ko00002,ko01000	-	GlutR_N,GlutR_dimer,Shikimate_DH	1439.75	0.127792	0.137132	57.9607	3.84971e-10	2.29331e-09	1290.57	1037.97	1123.81	1725.39	1320.71	1636.8	1828.41	1409.35
WP_259092373.1	helix-turn-helix domain-containing protein													1433.99	0.876112	0.353807	38.3668	2.58041e-06	8.19285e-06	1093.27	1893.16	683.173	716.115	1053.96	1655.56	1992.77	2006.93
WP_018196258.1	50S ribosomal protein L1	structural constituent of ribosome|0003735||IEA	translation|0006412||IEA		Binds directly to 23S rRNA. The L1 stalk is quite mobile in the ribosome, and is involved in E site tRNA release	ko:K02863	ko03010,map03010	M00178,M00179	-	-	br01610,ko00000,ko00001,ko00002,ko03011	-	Ribosomal_L1	1433.76	0.591903	0.15345	91.8436	5.17185e-17	6.43806e-16	1128.17	2322.16	1258.31	1091.42	1270.36	1500.34	1084.88	1701.49
WP_259100510.1	transcription termination factor NusA		DNA-templated transcription termination|0006353||IEA		Participates in both transcription termination and antitermination	ko:K02600	-	-	-	-	ko00000,ko03009,ko03021	-	HHH_5,KH_5,NusA_N,S1	1433.15	-0.246242	0.204269	30.6759	7.13394e-05	0.000172495	1582.45	1596.87	818.327	1531.01	1102.5	1375.76	1809.36	1333.74
WP_259102100.1	sulfatase-like hydrolase/transferase	sulfuric ester hydrolase activity|0008484||IEA			COG3119 Arylsulfatase A	ko:K01138	-	-	-	-	ko00000,ko01000	-	HEAT_2,Sulfatase	1432.61	-0.489296	0.205707	66.8996	6.2375e-12	4.68137e-11	1481.51	743.425	1159.85	2047.42	1490.12	1582.27	1828.93	1055.58
WP_259100091.1	hypothetical protein												phosphoribosylformylglycinamidine synthase activity|0004642||IEA	1431.89	-3.20233	0.916035	62.7176			2604.4	156.589	234.618	4893.16	296.996	2083.74	125.332	282.938
WP_259100244.1	hypothetical protein													1430.11	-0.0575595	0.159153	14.3129	0.0458876	0.0585557	1573.57	1639.69	1107.76	1437.29	1256.89	1415.34	1333.32	1511.81
WP_259095761.1	glycoside hydrolase family 127 protein			GH127	Beta-L-arabinofuranosidase, GH127	ko:K09955	-	-	-	-	ko00000	-	Glyco_hydro_127	1428.43	-0.00220129	0.174043	41.0295	7.99122e-07	2.78458e-06	1244.55	1178.73	1148.29	1517.55	1366.23	1467.16	2148.67	1242.17
WP_259097971.1	endonuclease MutS2	mismatched DNA binding|0030983||IEA	DNA metabolic process|0006259||IEA		Endonuclease that is involved in the suppression of homologous recombination and may therefore have a key role in the control of bacterial genetic diversity	ko:K07456	ko03430,map03430	-	-	-	ko00000,ko00001,ko03400	-	MutS_V,Smr	1426.94	0.121034	0.126788	9.71005	0.205609	0.229443	1351.65	1382.19	1179.61	1451.85	1569.75	1508.84	1467.79	1469.01
WP_018196494.1	ubiquitin-like small modifier protein 1				Molybdopterin converting factor, small subunit	ko:K03636	ko04122,map04122	-	-	-	ko00000,ko00001	-	ThiS	1426.7	0.61385	0.24479	29.5175	0.000116393	0.000269517	1092.84	2224.19	1251.25	1076.27	1293.65	1266.47	1434.07	1672.05
WP_259092388.1	tetratricopeptide repeat protein				COG0457 FOG TPR repeat	-	-	-	-	-	-	-	TPR_16,TPR_19,TPR_2,TPR_6,TPR_7,TPR_8	1425.39	-0.449327	0.227799	25.5021	0.000617927	0.001225	1676.66	1221.41	1465.45	1809.97	1164.74	1763.38	999.917	1228.06
WP_259097018.1	alginate export family protein				Alginate export	-	-	-	-	-	-	-	Alginate_exp	1424.69	0.135148	0.239755	17.7646	0.0130785	0.0190608	1136.71	1324.47	1374.18	1290.76	1773.9	1351.61	1997.56	1247.9
WP_259099784.1	cytochrome b N-terminal domain-containing protein	electron transfer activity|0009055||IEA,oxidoreductase activity|0016491||IEA			Component of the cytochrome b6-f complex, which mediates electron transfer between photosystem II (PSII) and photosystem I (PSI), cyclic electron flow around PSI, and state transitions	ko:K02635	ko00195,ko01100,map00195,map01100	M00162	-	-	ko00000,ko00001,ko00002,ko00194	-	Cytochrome_B	1424.58	-0.313026	0.18219	67.761	4.18257e-12	3.18546e-11	1356.14	958.269	1615.15	2364.68	1251.32	1462.23	1302.66	1091.97
WP_259093208.1	aldose 1-epimerase family protein				Domain of unknown function (DUF4432)	-	-	-	-	-	-	-	DUF4432	1424.49	-0.209701	0.17999	34.7904	1.22461e-05	3.4646e-05	1249.32	1329.84	1277.92	1666.79	1291.35	1384.84	2022.38	1080.23
WP_259092330.1	aldo/keto reductase	oxidoreductase activity%2C acting on the CH-OH group of donors%2C NAD or NADP as acceptor|0016616||IEA			Aldo/keto reductase family	-	-	-	-	-	-	-	Aldo_ket_red	1422.6	0.225239	0.258933	11.7904	0.107667	0.127352	1303.61	1217.92	1381.28	1091.6	1777.5	1408.4	1781.22	1523.81
WP_029699578.1	3-isopropylmalate dehydratase small subunit	3-isopropylmalate dehydratase activity|0003861||IEA	leucine biosynthetic process|0009098||IEA		Catalyzes the isomerization between 2-isopropylmalate and 3-isopropylmalate, via the formation of 2-isopropylmaleate	ko:K01704	ko00290,ko00660,ko01100,ko01110,ko01210,ko01230,map00290,map00660,map01100,map01110,map01210,map01230	M00432,M00535	R03896,R03898,R03968,R04001,R10170	RC00976,RC00977,RC01041,RC01046,RC03072	br01601,ko00000,ko00001,ko00002,ko01000	-	Aconitase_C	1418.07	0.310389	0.265162	8.91885	0.258535	0.283767	1276.19	1533.5	1314.73	1142.61	1681.7	1666	1200.66	1582.58
WP_259096058.1	M20/M25/M40 family metallo-hydrolase	hydrolase activity|0016787||IEA			PA domain	-	-	-	-	-	-	-	PA,PD40,PDZ_2,Peptidase_M28	1416.65	-0.00197189	0.141328	26.743	0.000370708	0.00077535	1289.06	1833.61	1315.43	1271.83	1323.37	1336.52	1610.63	1287.89
WP_259095079.1	SDR family oxidoreductase				short-chain dehydrogenase reductase SDR	ko:K01784	ko00052,ko00520,ko01100,map00052,map00520,map01100	M00361,M00362,M00632	R00291,R02984	RC00289	ko00000,ko00001,ko00002,ko01000	-	Epimerase	1413.52	0.588681	0.36418	12.0814	0.0979148	0.116857	988.268	1189.71	1454.83	1107.16	1777.17	1413.79	2026.14	1486.04
WP_259095119.1	phosphate acyltransferase PlsX	phosphate:acyl-[acyl carrier protein] acyltransferase activity|0043811||IEA	lipid biosynthetic process|0008610||IEA		Catalyzes the reversible formation of acyl-phosphate (acyl-PO(4)) from acyl- acyl-carrier-protein (acyl-ACP). This enzyme utilizes acyl-ACP as fatty acyl donor, but not acyl-CoA	ko:K03621	ko00561,ko00564,ko01100,ko01110,map00561,map00564,map01100,map01110	M00089	R00851,R09380	RC00004,RC00039,RC00041	ko00000,ko00001,ko00002,ko01000,ko01004	-	FA_synthesis	1412.88	0.383878	0.253793	9.36545	0.227472	0.251971	1171.49	1340.62	1499.85	1256.52	1710.61	1711.16	1212.71	1528.3
WP_259102337.1	F0F1 ATP synthase subunit A	proton-transporting ATP synthase activity%2C rotational mechanism|0046933||IEA	proton motive force-driven ATP synthesis|0015986||IEA											1411.23	0.603214	0.237767	24.8707	0.000799905	0.00154173	1148.93	1430.45	1728.16	1061.34	1820.7	1565.52	1031.34	1745.54
WP_018196623.1	D-alanine--D-alanine ligase	ATP binding|0005524||IEA,D-alanine-D-alanine ligase activity|0008716||IEA,metal ion binding|0046872||IEA	peptidoglycan biosynthetic process|0009252||IEA		Belongs to the D-alanine--D-alanine ligase family	ko:K01921	ko00473,ko00550,ko01100,ko01502,map00473,map00550,map01100,map01502	-	R01150	RC00064,RC00141	ko00000,ko00001,ko01000,ko01011	-	Dala_Dala_lig_C,Dala_Dala_lig_N	1410.95	0.665828	0.200764	15.8707	0.0263241	0.0355385	977.682	1574.14	1352.23	1473.4	1351.17	1542.3	1426.34	1550.86
WP_018196033.1	bifunctional nuclease family protein				Bifunctional nuclease	ko:K08999	-	-	-	-	ko00000	-	DNase-RNase	1410.29	-0.00520577	0.181478	76.473	7.19932e-14	6.59633e-13	1084.77	1206.87	1237.2	1697.22	1014.11	1376.5	2395.99	1079.89
WP_259094724.1	DEAD/DEAH box helicase	nucleic acid binding|0003676||IEA,ATP binding|0005524||IEA			dead DEAH box helicase	-	-	-	-	-	-	-	DEAD,DUF1998,Helicase_C	1409.87	0.219388	0.169545	11.8525	0.105513	0.125009	1285.14	1173.97	1473.14	1602.86	1593.33	1279	1457.38	1496.36
WP_259100967.1	glycoside hydrolase			GH129	Glycosyl hydrolases related to GH101 family, GH129	-	-	-	-	-	-	-	Glyco_hydro_129	1405.73	0.541394	0.242674	27.6737	0.00025193	0.000546884	1019.57	1818.2	1756.56	1019.75	1910.81	1212.17	1310.4	1483.65
WP_259093684.1	choice-of-anchor N protein				-	-	-	-	-	-	-	-	VPEP	1404.65	-0.171757	0.202895	7.02147	0.426647	0.449299	1649.94	1165.29	1437.09	1357.69	1311.4	1469.98	1360.49	1465.07
WP_259100988.1	DUF1015 domain-containing protein													1398.59	0.628953	0.263183	54.6068	1.78376e-09	9.65423e-09	978.481	2233.8	2050.71	1002.26	1686.72	1257.98	778.688	1513.51
WP_259092763.1	DUF1559 domain-containing protein				cell adhesion	ko:K02650	ko02020,map02020	-	-	-	ko00000,ko00001,ko02035,ko02044	3.A.15.2	N_methyl,SBP_bac_10	1397.08	-2.2645	0.594318	33.963	1.75015e-05	4.81152e-05	1723.3	1143.92	1145.53	3196.35	451.391	1479.05	1279.31	358.685
WP_259094889.1	glutamate--tRNA ligase	glutamate-tRNA ligase activity|0004818||IEA	glutamyl-tRNA aminoacylation|0006424||IEA		glutamate-tRNA ligase activity	ko:K01885,ko:K09698	ko00860,ko00970,ko01100,ko01110,ko01120,map00860,map00970,map01100,map01110,map01120	M00121,M00359,M00360	R03651,R05578	RC00055,RC00523	ko00000,ko00001,ko00002,ko01000,ko01007,ko02048,ko03016	-	tRNA-synt_1c	1396.51	0.284617	0.201439	22.5053	0.00207763	0.00365152	1319.56	1648.78	1078.16	1081.46	1396.63	1724.36	1209.98	1607.08
WP_259093551.1	DUF255 domain-containing protein				Protein of unknown function, DUF255	ko:K06888	-	-	-	-	ko00000	-	GlcNAc_2-epim,Glyco_hydro_9,Thioredox_DsbH	1394.18	0.0766756	0.208469	12.3758	0.0888568	0.106889	1252.04	1401.99	1685.78	1735.75	1339.23	1351.27	1145.79	1320.51
WP_259095165.1	cyclic dehypoxanthinyl futalosine synthase		menaquinone biosynthetic process|0009234||IEA		Radical SAM enzyme that catalyzes the cyclization of dehypoxanthine futalosine (DHFL) into cyclic dehypoxanthine futalosine (CDHFL), a step in the biosynthesis of menaquinone (MK, vitamin K2)	ko:K11779,ko:K11784	ko00130,ko00680,ko01110,ko01120,map00130,map00680,map01110,map01120	M00378	R08588,R09396	RC01381,RC02329,RC03002,RC03007	ko00000,ko00001,ko00002,ko01000	-	Radical_SAM	1393.87	0.225819	0.21812	21.491	0.00310749	0.00526943	1334.1	1778.15	1365.51	964.264	1593.02	1456.27	1156.41	1560.17
WP_259094698.1	SMC family ATPase													1385.19	0.117776	0.161333	29.3716	0.000123761	0.000284935	1337.28	1938.6	1152.98	1358.63	1270.19	1214.28	1242.98	1450.82
WP_020249872.1	AAA family ATPase													1384.3	-0.336062	0.224481	163.272	6.56878e-32	2.44467e-30	1073.78	615.537	842.745	2410.38	978.863	1235.77	2751.27	850.419
WP_259094837.1	beta-galactosidase	beta-galactosidase activity|0004565||IEA	carbohydrate metabolic process|0005975||IEA											1380.93	0.460059	0.144038	20.3017	0.00495353	0.00798671	1186.51	1439.91	1305.03	1382.47	1620.27	1373.94	1161.81	1631.97
WP_259094420.1	FkbM family methyltransferase	methyltransferase activity|0008168||IEA,S-adenosyl-L-methionine binding|1904047||IEA			3-demethylubiquinone-9 3-O-methyltransferase activity	-	-	-	-	-	-	-	Methyltransf_21,Methyltransf_25	1380.71	-0.0869547	0.261078	60.0481	1.47657e-10	9.43436e-10	1101.71	687.866	949.703	2055.61	1355.84	1685.71	2020.26	1037
WP_259095396.1	phosphoribosylanthranilate isomerase				Belongs to the TrpF family	ko:K01817	ko00400,ko01100,ko01110,ko01130,ko01230,map00400,map01100,map01110,map01130,map01230	M00023	R03509	RC00945	ko00000,ko00001,ko00002,ko01000	-	PRAI	1378.34	0.275987	0.197569	10.6716	0.153599	0.176141	1126.33	1232.97	1316.74	1602.57	1389.29	1372.52	1606.63	1362.82
WP_259097099.1	alpha-amylase family glycosyl hydrolase	catalytic activity|0003824||IEA	carbohydrate metabolic process|0005975||IEA	GH13										1371.98	0.4975	0.130347	81.1917	7.86972e-15	7.78348e-14	1119.17	1735.72	1650.89	1051.14	1656.7	1388.5	980.779	1580.79
WP_259094228.1	transposase	transposase activity|0004803||IEA			Putative transposase DNA-binding domain	-	-	-	-	-	-	-	OrfB_Zn_ribbon	1371.58	-0.347818	0.196961	46.4125	7.26616e-08	3.06435e-07	1397.88	990.502	1602.63	1879.18	849.048	1425.54	1631.86	1098.81
WP_259093599.1	FAD-dependent thymidylate synthase	thymidylate synthase (FAD) activity|0050797||IEA	2'-deoxyribonucleotide biosynthetic process|0009265||IEA		Catalyzes the reductive methylation of 2'-deoxyuridine- 5'-monophosphate (dUMP) to 2'-deoxythymidine-5'-monophosphate (dTMP) while utilizing 5,10-methylenetetrahydrofolate (mTHF) as the methyl donor, and NADPH and FADH(2) as the reductant	ko:K03465	ko00240,ko00670,ko01100,map00240,map00670,map01100	-	R06613	RC00022,RC00332	ko00000,ko00001,ko01000	-	Thy1	1368.16	0.299719	0.169924	30.9274	6.41192e-05	0.000157142	1211.97	1145.94	1142.64	1101.44	1464.45	1548.93	1795.54	1491.26
WP_259102394.1	helicase-related protein				helicase activity	-	-	-	-	-	-	-	DUF3883,Helicase_C,SNF2_N	1366.04	-0.180828	0.166911	44.794	1.49944e-07	5.95486e-07	1246.43	1760.44	1106.31	1833.05	1043.65	1237.12	1407.22	1100.05
WP_259096763.1	hypothetical protein												iron-sulfur cluster binding|0051536||IEA	1364.14	-0.400742	0.331214	10.6694	0.153703	0.176205	1409.22	1691.69	1317.52	1418.14	1147.29	1764.31	1009.26	1067.87
WP_259095501.1	hypothetical protein													1362.51	-0.430579	0.208111	18.8855	0.00855383	0.0130513	1701.24	1114.97	1221.69	1652.76	1266.92	1498.25	1103.26	1262.19
WP_259096060.1	CDGSH iron-sulfur domain-containing protein	2 iron%2C 2 sulfur cluster binding|0051537||IEA			Iron-binding zinc finger CDGSH type	-	-	-	-	-	-	-	zf-CDGSH	1361.45	-0.356534	0.245129	46.6739	6.46197e-08	2.73479e-07	1196.3	2320.31	1918.03	1221.2	1221.82	1137.9	1080.65	934.368
WP_259096601.1	molybdopterin molybdotransferase MoeA	molybdenum ion binding|0030151||IEA,metal ion binding|0046872||IEA			MoeA domain protein domain I and II	ko:K03750	ko00790,ko01100,map00790,map01100	-	R09735	RC03462	ko00000,ko00001,ko01000	-	MoCF_biosynth,MoeA_C,MoeA_N	1361.33	0.646062	0.231758	19.2197	0.0075262	0.0116408	1066.02	1629.84	1454.15	1197.5	1609.54	1359.59	1019.94	1667.72
WP_018196588.1	rod shape-determining protein				Cell shape determining protein MreB Mrl	ko:K03569	-	-	-	-	ko00000,ko02048,ko03036,ko04812	1.A.33.1,9.B.157.1	MreB_Mbl	1360.43	0.555114	0.228434	32.7384	2.96181e-05	7.76481e-05	1041.1	1940.91	1366.32	890.156	1564.58	1426.27	1194.45	1529.65
WP_259093755.1	DNA polymerase I	nucleic acid binding|0003676||IEA,DNA binding|0003677||IEA,DNA-directed DNA polymerase activity|0003887||IEA,3'-5' exonuclease activity|0008408||IEA	DNA-templated DNA replication|0006261||IEA		In addition to polymerase activity, this DNA polymerase exhibits 5'-3' exonuclease activity	ko:K02335	ko00230,ko00240,ko01100,ko03030,ko03410,ko03420,ko03440,map00230,map00240,map01100,map03030,map03410,map03420,map03440	-	R00375,R00376,R00377,R00378	RC02795	ko00000,ko00001,ko01000,ko03032,ko03400	-	5_3_exonuc,5_3_exonuc_N,DNA_pol_A,DNA_pol_A_exo1	1360.04	0.0883731	0.130407	73.1949	3.33301e-13	2.89234e-12	1210.54	1042.52	1212.1	1744.32	1180.35	1209.02	1885.71	1286.52
WP_259094767.1	HAD family hydrolase				haloacid dehalogenase-like hydrolase	-	-	-	-	-	-	-	Hydrolase	1359.67	0.0575047	0.227533	40.6342	9.51596e-07	3.27168e-06	1445.63	931.721	2327.35	1124.77	1671.48	1255.27	1043.7	1503.94
WP_018196096.1	single-stranded DNA-binding protein	single-stranded DNA binding|0003697||IEA	DNA replication|0006260||IEA,DNA repair|0006281||IEA,DNA recombination|0006310||IEA,DNA-templated transcription|0006351||IEA		Plays an important role in DNA replication, recombination and repair. Binds to ssDNA and to an array of partner proteins to recruit them to their sites of action during DNA metabolism	ko:K03111	ko03030,ko03430,ko03440,map03030,map03430,map03440	-	-	-	ko00000,ko00001,ko03029,ko03032,ko03400	-	SSB	1359.32	0.583862	0.145957	44.4303	1.76389e-07	6.8765e-07	1192.63	1213.56	991.673	1321.06	1112.48	1465.34	1585.51	1787.5
WP_259096519.1	ATP-dependent zinc metalloprotease FtsH	metalloendopeptidase activity|0004222||IEA,ATP hydrolysis activity|0016887||IEA	proteolysis|0006508||IEA,cell division|0051301||IEA		Acts as a processive, ATP-dependent zinc metallopeptidase for both cytoplasmic and membrane proteins. Plays a role in the quality control of integral membrane proteins	ko:K03798	-	M00742	-	-	ko00000,ko00002,ko01000,ko01002,ko03110	-	AAA,FtsH_ext,Peptidase_M41	1354.25	-0.106346	0.180662	24.0102	0.00113467	0.00210708	1365.85	1820.89	1201.61	1444.64	1205.98	1389.06	1037.01	1268.65
WP_259100819.1	Gfo/Idh/MocA family oxidoreductase	oxidoreductase activity|0016491||IEA,oxidoreductase activity%2C acting on NAD(P)H|0016651||IEA		GH179	Oxidoreductase domain protein	-	-	-	-	-	-	-	GFO_IDH_MocA,GFO_IDH_MocA_C	1353.48	0.364999	0.179461	14.7802	0.0389219	0.0503252	1176.45	1291.72	1105.81	1169.35	1492.76	1531.05	1509.94	1514.63
WP_259101070.1	50S ribosomal protein L22	structural constituent of ribosome|0003735||IEA	translation|0006412||IEA		The globular domain of the protein is located near the polypeptide exit tunnel on the outside of the subunit, while an extended beta-hairpin is found that lines the wall of the exit tunnel in the center of the 70S ribosome	ko:K02890	ko03010,map03010	M00178,M00179	-	-	br01610,ko00000,ko00001,ko00002,ko03011	-	Ribosomal_L22	1350.39	0.471474	0.239553	68.4724	3.00582e-12	2.31859e-11	1106.61	2273.86	1331.94	764.773	1656.33	1459.04	771.9	1534.51
WP_259093891.1	mandelate racemase/muconate lactonizing enzyme family protein				PFAM Mandelate racemase muconate lactonizing	ko:K01684	ko00052,ko01100,ko01120,map00052,map01100,map01120	M00552	R03033	RC00543	ko00000,ko00001,ko00002,ko01000	-	MR_MLE_C,MR_MLE_N	1345.25	-0.0302522	0.213659	7.24291	0.404034	0.42748	1205.12	1409.57	1361.2	1209.99	1632.4	1489.55	1375.59	1179.61
WP_018196802.1	30S ribosomal protein S16	structural constituent of ribosome|0003735||IEA	translation|0006412||IEA		Belongs to the bacterial ribosomal protein bS16 family	ko:K02959	ko03010,map03010	M00178	-	-	br01610,ko00000,ko00001,ko00002,ko03011,ko03029	-	Ribosomal_S16	1342.9	0.765584	0.285769	32.7686	2.92379e-05	7.6707e-05	1002.78	1145.68	1027.05	838.109	1410.03	1418.22	2113.99	1704.44
WP_259101869.1	penicillin-binding protein 2	penicillin binding|0008658||IEA	peptidoglycan biosynthetic process|0009252||IEA											1338.97	-0.136955	0.234431	54.6612	1.74006e-09	9.44603e-09	1072.59	2500.76	1022.13	1288.36	1045.19	1397.46	1206.61	975.097
WP_259098333.1	type II secretion system protein GspK		protein secretion|0009306||IEA											1338.94	-0.267451	0.218385	213.549	1.54243e-42	1.32575e-40	1060.86	1327.59	4368.25	1460.27	833.443	1075.82	544.903	881.617
WP_259100209.1	2%2C3-bisphosphoglycerate-independent phosphoglycerate mutase				2,3-bisphosphoglycerate-independent phosphoglycerate mutase	ko:K15635	ko00010,ko00260,ko00680,ko01100,ko01110,ko01120,ko01130,ko01200,ko01230,map00010,map00260,map00680,map01100,map01110,map01120,map01130,map01200,map01230	M00001,M00002,M00003	R01518	RC00536	ko00000,ko00001,ko00002,ko01000	-	Metalloenzyme,PhosphMutase	1338.17	0.617767	0.242762	21.6757	0.00288874	0.00492834	1000.05	1589.33	1394.12	980.792	1748.58	1485	1128.84	1534.08
WP_259100113.1	SDR family oxidoreductase	oxidoreductase activity%2C acting on NAD(P)H%2C quinone or similar compound as acceptor|0016655||IEA			NmrA-like family	ko:K19267	ko00130,ko01110,map00130,map01110	-	R02964,R03643,R03816	RC00819	ko00000,ko00001,ko01000	-	NAD_binding_10,NmrA	1337.56	0.071188	0.213341	4.12887	0.76482	0.77274	1269	1270.03	1397.06	1334.47	1567.87	1444.68	1181.45	1332.5
WP_259097046.1	(2Fe-2S)-binding protein	metal ion binding|0046872||IEA,iron-sulfur cluster binding|0051536||IEA,2 iron%2C 2 sulfur cluster binding|0051537||IEA			2Fe-2S -binding domain protein	ko:K13483	ko00230,ko01100,ko01120,map00230,map01100,map01120	M00546	R01768,R02103	RC00143	ko00000,ko00001,ko00002	-	Fer2,Fer2_2	1336.08	0.157319	0.196702	35.561	8.77133e-06	2.55359e-05	1176.32	2041.04	1139.96	1023.76	1338.07	1439.32	1154.56	1310.92
WP_259097440.1	Gfo/Idh/MocA family oxidoreductase	oxidoreductase activity|0016491||IEA			dehydrogenases and related proteins	-	-	-	-	-	-	-	GFO_IDH_MocA,GFO_IDH_MocA_C	1335.54	0.978699	0.556397	14.6152	0.0412613	0.0531428	860.524	1634.81	1784.6	574.574	2036.37	1449.18	1031.76	1695.83
WP_259093940.1	acetylornithine transaminase	transaminase activity|0008483||IEA,pyridoxal phosphate binding|0030170||IEA	arginine metabolic process|0006525||IEA		PFAM Aminotransferase class-III	ko:K00821	ko00220,ko00300,ko01100,ko01110,ko01120,ko01130,ko01210,ko01230,map00220,map00300,map01100,map01110,map01120,map01130,map01210,map01230	M00016,M00028,M00845	R02283,R04475	RC00006,RC00062	ko00000,ko00001,ko00002,ko01000,ko01007	-	Aminotran_3	1331.61	0.842196	0.18087	43.5292	2.63581e-07	9.9741e-07	931.733	1789.62	1178.45	1068.14	1523.84	1287.5	1216.91	1669.74
WP_259101005.1	tetratricopeptide repeat protein													1331.41	0.1351	0.157392	33.9399	1.76763e-05	4.85259e-05	1222.11	919.268	1550.29	1661.75	1368.18	1405.07	1267.08	1342.74
WP_018195408.1	tRNA pseudouridine(55) synthase TruB	pseudouridylate synthase activity|0004730||IEA	tRNA modification|0006400||IEA		Responsible for synthesis of pseudouridine from uracil- 55 in the psi GC loop of transfer RNAs	ko:K03177	-	-	-	-	ko00000,ko01000,ko03016	-	TruB-C_2,TruB_C_2,TruB_N	1330.03	0.0156604	0.149302	112.607	2.64075e-21	4.58323e-20	1216.53	778.798	980.201	1916.78	1104.71	1372.06	1850.56	1228.87
WP_259096148.1	sugar phosphate isomerase/epimerase	isomerase activity|0016853||IEA			Xylose isomerase-like TIM barrel	-	-	-	-	-	-	-	AP_endonuc_2	1328.47	0.507506	0.256745	23.484	0.00140327	0.00256366	985.663	1608.67	1050.39	1062.88	1203.92	1250.44	1930.95	1400.64
WP_259093979.1	phosphopyruvate hydratase	phosphopyruvate hydratase activity|0004634||IEA	glycolytic process|0006096||IEA		Catalyzes the reversible conversion of 2- phosphoglycerate into phosphoenolpyruvate. It is essential for the degradation of carbohydrates via glycolysis	ko:K01689	ko00010,ko00680,ko01100,ko01110,ko01120,ko01130,ko01200,ko01230,ko03018,ko04066,map00010,map00680,map01100,map01110,map01120,map01130,map01200,map01230,map03018,map04066	M00001,M00002,M00003,M00346,M00394	R00658	RC00349	ko00000,ko00001,ko00002,ko01000,ko03019,ko04147	-	Enolase_C,Enolase_N	1328.29	0.982342	0.295851	39.5191	1.5557e-06	5.16658e-06	947.517	1696.24	1460.99	752.213	1961.36	1301.8	889.769	1871.68
WP_259099629.1	DUF499 domain-containing protein													1326.08	0.543723	0.176364	41.4154	6.73711e-07	2.38441e-06	982.386	1823.18	1358.71	963.271	1391.4	1227.25	1462.81	1432.26
WP_259097022.1	ammonia-forming cytochrome c nitrite reductase subunit c552	nitrite reductase (cytochrome%2C ammonia-forming) activity|0042279||IEA	nitrogen compound metabolic process|0006807||IEA											1325.13	0.436686	0.187674	42.8414	3.57921e-07	1.32658e-06	1044.68	1857.32	1303.21	1061.61	1446.73	1558.29	949.331	1413.08
WP_259095769.1	hypoxanthine phosphoribosyltransferase		purine ribonucleoside salvage|0006166||IEA		Belongs to the purine pyrimidine phosphoribosyltransferase family	ko:K00760	ko00230,ko00983,ko01100,ko01110,map00230,map00983,map01100,map01110	-	R00190,R01132,R01229,R02142,R08237,R08238,R08245	RC00063,RC00122	ko00000,ko00001,ko01000	-	Pribosyltran	1324.31	-0.664805	0.201601	50.8428	9.86548e-09	4.83891e-08	1762.07	1288.13	1036.13	1304.25	1081.29	1954.41	880.147	1110.96
WP_259095935.1	prephenate dehydratase	prephenate dehydratase activity|0004664||IEA	L-phenylalanine biosynthetic process|0009094||IEA		Chorismate mutase	ko:K00661,ko:K01713,ko:K04092,ko:K04093,ko:K04516,ko:K04518,ko:K14170,ko:K14187	ko00400,ko00401,ko01100,ko01110,ko01130,ko01230,map00400,map00401,map01100,map01110,map01130,map01230	M00024,M00025	R00691,R01373,R01715,R01728	RC00125,RC00360,RC03116	ko00000,ko00001,ko00002,ko01000	-	ACT,CM_2,PDT	1319.84	0.68861	0.231565	31.4344	5.16883e-05	0.000129131	1053.46	1561.61	1327.08	942.413	1622.91	1522.43	934.815	1697.42
WP_259095465.1	PhoH family protein	ATP binding|0005524||IEA			PFAM PhoH family protein	ko:K06217	-	-	-	-	ko00000	-	PhoH	1319.07	0.306536	0.241477	17.7458	0.0131709	0.01918	1290.48	1133.74	1164.1	1757.79	1351.64	1246.63	971.4	1596
WP_259092405.1	hypothetical protein													1312.69	0.411649	0.268889	26.042	0.000495031	0.00100907	1079.62	1477.47	1516.29	697.246	1680.82	1369.52	1435.17	1435.99
WP_259095310.1	30S ribosomal protein S20	structural constituent of ribosome|0003735||IEA	translation|0006412||IEA		Binds directly to 16S ribosomal RNA	ko:K02968	ko03010,map03010	M00178	-	-	br01610,ko00000,ko00001,ko00002,ko03011	-	Ribosomal_S20p	1312.36	0.345062	0.244852	6.29543	0.505708	0.525808	1031.71	1529.96	1255.08	1311.95	1220.48	1405.11	1384.46	1310.43
WP_259101438.1	winged helix-turn-helix transcriptional regulator				Transcriptional	-	-	-	-	-	-	-	HxlR	1310.87	-0.187762	0.187772	16.3647	0.0219857	0.0302125	1497.1	1290.41	1138.29	1581.57	933.29	1261.5	1286.79	1314.61
WP_259094202.1	GDP-mannose 4%2C6-dehydratase				Polysaccharide biosynthesis protein	ko:K15856	ko00051,ko00520,map00051,map00520	-	R03397,R03399	RC00182	ko00000,ko00001,ko01000	-	GDP_Man_Dehyd	1309.08	-0.234418	0.179811	5.27702	0.626197	0.640933	1442.56	1289.02	1282.55	1151.46	1411.37	1419.57	1275.02	1226.32
WP_259096238.1	oligogalacturonate lyase family protein													1308.59	0.322808	0.245888	7.70712	0.359126	0.383111	1136.82	1056.93	1275.95	1310.07	1295.16	1363.68	1593.35	1421.4
WP_259096242.1	DegT/DnrJ/EryC1/StrS family aminotransferase	transaminase activity|0008483||IEA			DegT/DnrJ/EryC1/StrS aminotransferase family	ko:K13010	ko00520,map00520	-	R10460	RC00006,RC00781	ko00000,ko00001,ko01000,ko01005,ko01007	-	DegT_DnrJ_EryC1	1305.83	-0.121619	0.25148	4.05202	0.773767	0.781342	1185.48	1272.75	1323.62	1415.33	1445.14	1390.08	1377.25	1089.36
WP_259096389.1	sugar phosphate isomerase/epimerase family protein	catalytic activity|0003824||IEA			isomerase	-	-	-	-	-	-	-	AP_endonuc_2	1299.82	0.169545	0.266376	32.5164	3.25723e-05	8.46553e-05	1054.97	1836.66	1034.16	792.061	1506.02	1193.26	1775.42	1186.17
WP_259094208.1	carboxypeptidase-like regulatory domain-containing protein													1299.25	-1.97138	0.326173	82.9464	3.44808e-15	3.57689e-14	1940.11	556.047	1263.08	1932.15	569.997	1781.88	1600.89	494.717
WP_018195818.1	S-methyl-5'-thioadenosine phosphorylase	S-methyl-5-thioadenosine phosphorylase activity|0017061||IEA	nucleoside metabolic process|0009116||IEA		Purine nucleoside phosphorylase which is highly specific for 6-oxopurine nucleosides. Cleaves guanosine or inosine to respective bases and sugar-1-phosphate molecules. Involved in purine salvage	ko:K00772	ko00270,ko01100,map00270,map01100	M00034	R01402	RC00063,RC02819	ko00000,ko00001,ko00002,ko01000	-	PNP_UDP_1	1298.95	0.430275	0.244279	7.69289	0.360452	0.384411	1094.93	1460.4	1275.48	1049.1	1407.41	1272.26	1385.09	1475.29
WP_259094115.1	LON peptidase substrate-binding domain-containing protein													1298.33	-0.168452	0.222879	10.7544	0.149694	0.172101	1415.29	1044.65	1319.54	1282.16	1171.97	1657.11	1202.12	1258.74
WP_259097186.1	DegT/DnrJ/EryC1/StrS family aminotransferase	transaminase activity|0008483||IEA			UDP-4-amino-4-deoxy-L-arabinose aminotransferase	-	-	-	-	-	-	-	DegT_DnrJ_EryC1	1297.06	0.161996	0.244594	5.84915	0.55747	0.576308	1119.79	1397.71	1416.12	1098.95	1515.58	1415.61	1272.51	1252.73
WP_259096841.1	rod shape-determining protein	ATP binding|0005524||IEA	cell morphogenesis|0000902||IEA,regulation of cell shape|0008360||IEA		TIGRFAM Cell shape determining protein MreB Mrl	ko:K03569	-	-	-	-	ko00000,ko02048,ko03036,ko04812	1.A.33.1,9.B.157.1	MreB_Mbl	1294.53	0.752661	0.271184	21.4035	0.00321671	0.00543649	906.195	1669.49	1533.72	865.142	1313.98	1265.67	1361.78	1526.47
WP_259096303.1	bifunctional 5%2C10-methylenetetrahydrofolate dehydrogenase/5%2C10-methenyltetrahydrofolate cyclohydrolase				Catalyzes the oxidation of 5,10- methylenetetrahydrofolate to 5,10-methenyltetrahydrofolate and then the hydrolysis of 5,10-methenyltetrahydrofolate to 10- formyltetrahydrofolate	ko:K01491	ko00670,ko00720,ko01100,ko01120,ko01200,map00670,map00720,map01100,map01120,map01200	M00140,M00377	R01220,R01655	RC00202,RC00578	ko00000,ko00001,ko00002,ko01000	-	THF_DHG_CYH,THF_DHG_CYH_C	1293.53	1.07629	0.398524	15.7203	0.0277988	0.0372093	814.032	1513.14	1747.47	948.949	1736.51	1206.84	963.973	1716.31
WP_259096687.1	cation diffusion facilitator family transporter	monoatomic cation transmembrane transporter activity|0008324||IEA			TIGRFAM cation diffusion facilitator family transporter	ko:K16264	-	-	-	-	ko00000,ko02000	2.A.4.1	Cation_efflux	1293.47	0.110834	0.188404	30.905	6.4733e-05	0.000158324	1325.55	1769.61	1051.13	1157.6	1085.68	1413.37	963.402	1431.37
WP_259093649.1	uroporphyrinogen decarboxylase family protein	uroporphyrinogen decarboxylase activity|0004853||IEA	porphyrin-containing compound biosynthetic process|0006779||IEA		Uroporphyrinogen decarboxylase (URO-D)	ko:K01599	ko00860,ko01100,ko01110,map00860,map01100,map01110	M00121	R03197,R04972	RC00872	ko00000,ko00001,ko00002,ko01000	-	URO-D	1293.25	0.285351	0.183102	14.6866	0.040234	0.0519101	1174.56	977.917	1289.06	1300.42	1282.91	1388.76	1496.46	1431.06
WP_259094189.1	PEGA domain-containing protein													1288.65	-2.15013	0.228674	159.816	3.5063e-31	1.25324e-29	2259.95	722.949	875.298	878.539	1001.04	2294.14	1534.92	508.702
WP_259093349.1	xanthine dehydrogenase family protein subunit M				CO dehydrogenase flavoprotein C-terminal domain	ko:K03519	-	-	R11168	RC02800	ko00000,ko01000	-	CO_deh_flav_C,FAD_binding_5	1285.62	0.0987913	0.191506	60.4867	1.20684e-10	7.83577e-10	1059.39	1995.68	999.002	848.324	1237.96	1252.76	1646.68	1133.76
WP_259096458.1	molybdopterin-binding protein				Probable molybdopterin binding domain	ko:K03638	ko00790,ko01100,map00790,map01100	-	R09726	RC00002	ko00000,ko00001,ko01000	-	MoCF_biosynth	1284.87	0.275667	0.152624	144.537	5.68821e-28	1.66947e-26	1015.63	721.201	1562.31	1099.66	1051.26	2283.61	1331.46	1228.46
WP_259101658.1	anthranilate synthase component I	anthranilate synthase activity|0004049||IEA	tryptophan biosynthetic process|0000162||IEA		Part of a heterotetrameric complex that catalyzes the two-step biosynthesis of anthranilate, an intermediate in the biosynthesis of L-tryptophan. In the first step, the glutamine- binding beta subunit (TrpG) of anthranilate synthase (AS) provides the glutamine amidotransferase activity which generates ammonia as a substrate that, along with chorismate, is used in the second step, catalyzed by the…	ko:K01657	ko00400,ko00405,ko01100,ko01110,ko01130,ko01230,ko02024,ko02025,map00400,map00405,map01100,map01110,map01130,map01230,map02024,map02025	M00023	R00985,R00986	RC00010,RC02148,RC02414	ko00000,ko00001,ko00002,ko01000	-	Anth_synt_I_N,Chorismate_bind	1284.84	0.572436	0.356537	8.13992	0.320418	0.345596	1000.33	990.885	1403.55	1046.46	1546.17	1430.3	1500.22	1487.5
WP_259096774.1	glycosidase			GH130_9	PFAM glycosidase PH1107-related	-	-	-	-	-	-	-	Glyco_hydro_130	1284.55	-0.166341	0.197969	122.647	2.15149e-23	4.413e-22	1144.4	807.507	565.587	1785.98	1052.01	1282.41	2300.76	1020.56
WP_259092617.1	adenosylmethionine decarboxylase	adenosylmethionine decarboxylase activity|0004014||IEA	spermidine biosynthetic process|0008295||IEA		Catalyzes the decarboxylation of S-adenosylmethionine to S-adenosylmethioninamine (dcAdoMet), the propylamine donor required for the synthesis of the polyamines spermine and spermidine from the diamine putrescine	ko:K01611	ko00270,ko00330,ko01100,map00270,map00330,map01100	M00034,M00133	R00178	RC00299	ko00000,ko00001,ko00002,ko01000	-	AdoMet_dc	1280.52	-0.211014	0.198623	152.172	1.41966e-29	4.4565e-28	1253.81	2956.43	1092.63	700.065	1094.54	993.881	945.169	1083.04
WP_259099655.1	hypothetical protein												oxidoreductase activity|0016491||IEA,oxidoreductase activity%2C acting on NAD(P)H|0016651||IEA	1280.32	0.0916794	0.237404	34.9352	1.15024e-05	3.27217e-05	979.36	1447.8	892.011	1125.47	1225.07	1343.37	2038.41	1043.19
WP_259096091.1	TldD/PmbA family protein	zinc ion binding|0008270||IEA	proteolysis|0006508||IEA		Putative modulator of DNA gyrase	-	-	-	-	-	-	-	PmbA_TldD	1278.9	0.215343	0.143315	33.3515	2.27681e-05	6.11592e-05	1179.19	1747.56	1230.2	1186.05	1257.21	1172.76	1065.53	1369.21
WP_259092309.1	UPF0182 family protein				PFAM Uncharacterised protein family UPF0182	ko:K09118	-	-	-	-	ko00000	-	UPF0182	1278.07	-0.301697	0.126558	37.1885	4.32041e-06	1.32625e-05	1464.24	1394.45	1381.83	1345.09	1221.98	1335.31	909.081	1188.45
WP_259094342.1	AAA domain-containing protein	helicase activity|0004386||IEA												1275.44	0.0104145	0.17445	9.88734	0.195048	0.218944	1233.48	1180.17	1216.25	1553.67	1071.81	1273.58	1344.96	1242.02
WP_259093694.1	primosomal protein N'	DNA helicase activity|0003678||IEA,DNA replication origin binding|0003688||IEA,hydrolase activity%2C acting on acid anhydrides%2C in phosphorus-containing anhydrides|0016818||IEA	DNA replication|0006260||IEA		Involved in the restart of stalled replication forks. Recognizes and binds the arrested nascent DNA chain at stalled replication forks. It can open the DNA duplex, via its helicase activity, and promote assembly of the primosome and loading of the major replicative helicase DnaB onto DNA	ko:K04066	ko03440,map03440	-	-	-	ko00000,ko00001,ko01000,ko03400	-	DEAD,Helicase_C,ResIII	1274.36	-0.252283	0.123801	90.8677	8.20766e-17	9.84374e-16	1383.99	860.777	1238.66	1898.3	1192.88	1203.49	1215.37	1162.32
WP_259095030.1	hypothetical protein													1271.6	0.290673	0.168621	15.539	0.0296786	0.0393896	1127.7	1092.58	1344.26	1121.77	1550.64	1445.6	1227.39	1380.12
WP_259093448.1	Xaa-Pro peptidase family protein	peptidase activity|0008233||IEA	proteolysis|0006508||IEA		proline dipeptidase activity	ko:K01262	-	-	-	-	ko00000,ko01000,ko01002	-	Peptidase_M24	1270.68	-0.183826	0.129982	14.2321	0.0472036	0.0601076	1368.16	1382.73	1433.62	1154.05	1287.02	1087.71	1306.44	1205.44
WP_259095839.1	pyrroline-5-carboxylate reductase	pyrroline-5-carboxylate reductase activity|0004735||IEA	proline biosynthetic process|0006561||IEA		Catalyzes the reduction of 1-pyrroline-5-carboxylate (PCA) to L-proline	ko:K00286	ko00330,ko01100,ko01110,ko01130,ko01230,map00330,map01100,map01110,map01130,map01230	M00015	R01248,R01251,R03291,R03293	RC00054,RC00083	ko00000,ko00001,ko00002,ko01000	-	F420_oxidored,P5CR_dimer	1269.21	0.78957	0.259442	21.8953	0.00264813	0.0045566	969.979	1401.29	1029.8	945.724	1675.28	1408.44	1102.26	1676.49
WP_259096683.1	PBP1A family penicillin-binding protein	penicillin binding|0008658||IEA		GT51	Peptidoglycan polymerase that catalyzes glycan chain elongation from lipid-linked precursors	ko:K05365,ko:K05366,ko:K12555,ko:K21464	ko00550,ko01100,ko01501,map00550,map01100,map01501	-	R04519	RC00005,RC00049	ko00000,ko00001,ko01000,ko01003,ko01011	-	Transgly,Transpeptidase,UB2H	1268.96	-0.0676115	0.218149	25.1777	0.00070568	0.00137554	1360.3	1079.43	1183.49	1877.65	931.063	1126.49	1154.31	1297.79
WP_018196232.1	aminofutalosine synthase MqnE		menaquinone biosynthetic process|0009234||IEA		Radical SAM enzyme that catalyzes the addition of the adenosyl radical to the double bond of 3- (1- carboxyvinyl)oxy benzoate, leading to aminodeoxyfutalosine (AFL), a key intermediate in the formation of menaquinone (MK, vitamin K2) from chorismate	ko:K11779,ko:K11784,ko:K18285	ko00130,ko00680,ko01110,ko01120,map00130,map00680,map01110,map01120	M00378	R08588,R09396,R10667	RC00021,RC01381,RC02329,RC03002,RC03007,RC03234	ko00000,ko00001,ko00002,ko01000	-	Radical_SAM	1267.94	0.533538	0.291583	25.16	0.000710793	0.00138417	1107.87	1007.21	1221.34	702.127	1599.49	1536.79	1459.84	1603.81
WP_259100847.1	heavy metal translocating P-type ATPase	ATP binding|0005524||IEA,ATPase-coupled monoatomic cation transmembrane transporter activity|0019829||IEA	monoatomic cation transport|0006812||IEA		ATPase, P-type (transporting), HAD superfamily, subfamily IC	ko:K17686	ko01524,ko04016,map01524,map04016	-	R00086	RC00002	ko00000,ko00001,ko01000	3.A.3.5	E1-E2_ATPase,HMA,Hydrolase	1267.66	-0.090168	0.227941	3.00221	0.884798	0.887748	1238.62	1257.66	1295.25	1429.53	1125.26	1236.03	1356.89	1163.74
WP_259100565.1	glucose-6-phosphate isomerase family protein	glucose-6-phosphate isomerase activity|0004347||IEA	gluconeogenesis|0006094||IEA,glycolytic process|0006096||IEA		PFAM Glucose-6-phosphate isomerase	ko:K06859	ko00010,ko00030,ko00500,ko00520,ko01100,ko01110,ko01120,ko01130,ko01200,map00010,map00030,map00500,map00520,map01100,map01110,map01120,map01130,map01200	M00001,M00004,M00114	R02739,R02740,R03321	RC00376,RC00563	ko00000,ko00001,ko00002,ko01000	-	GPI	1266.44	-0.0341596	0.143612	13.6779	0.057216	0.0716192	1216.4	1464.62	1065.63	1175.97	1364.48	1220.38	1402.33	1187.5
WP_259094761.1	YgiT-type zinc finger protein													1265.94	-0.55047	0.314645	21.8183	0.00273026	0.00468229	1373.6	1178.16	1221.02	1769.93	931.881	1732.1	856.815	937.668
WP_259094468.1	glycosyltransferase			GT4									protein binding|0005515||IEA	1264.5	0.552099	0.219281	35.3748	9.50867e-06	2.75271e-05	1046.99	746.046	1700.57	1477.27	1361.66	1269.76	1156.39	1535.07
WP_259094427.1	glycosyltransferase family 9 protein	glycosyltransferase activity|0016757||IEA		GT9	Glycosyltransferase family 9 (heptosyltransferase)	ko:K02849	ko00540,ko01100,map00540,map01100	M00080	-	-	ko00000,ko00001,ko00002,ko01000,ko01003,ko01005	-	Glyco_transf_9	1264.46	-0.554583	0.206096	140.057	4.94536e-27	1.32243e-25	1281.57	459.545	903.934	2139.01	1037.79	1490.01	1735.75	872.349
WP_259095823.1	bifunctional 3%2C4-dihydroxy-2-butanone-4-phosphate synthase/GTP cyclohydrolase II	GTP cyclohydrolase II activity|0003935||IEA,3%2C4-dihydroxy-2-butanone-4-phosphate synthase activity|0008686||IEA			Catalyzes the conversion of D-ribulose 5-phosphate to formate and 3,4-dihydroxy-2-butanone 4-phosphate	ko:K14652	ko00740,ko00790,ko01100,ko01110,map00740,map00790,map01100,map01110	M00125,M00840	R00425,R07281	RC00293,RC01792,RC01815,RC02504	ko00000,ko00001,ko00002,ko01000	-	DHBP_synthase,GTP_cyclohydro2	1264.2	0.382516	0.235828	12.6172	0.082003	0.0993726	1061.77	960.878	1386.86	1137.02	1350.46	1392.97	1509.23	1384.04
WP_259094731.1	sugar phosphate isomerase/epimerase family protein	catalytic activity|0003824||IEA			myo-inosose-2 dehydratase activity	-	-	-	-	-	-	-	AP_endonuc_2,AP_endonuc_2_N	1263.7	0.684438	0.180669	40.2378	1.13351e-06	3.82071e-06	937.082	1686.34	1326.49	948.229	1391.39	1308.83	1069.8	1504.97
WP_259094779.1	SAVED domain-containing protein													1261.24	0.100085	0.200793	20.6697	0.00429111	0.00703493	1210.15	1091.94	1954.05	1095.52	1299.05	1246.63	1138.73	1297.38
WP_259091788.1	MoxR family ATPase	ATP binding|0005524||IEA,ATP hydrolysis activity|0016887||IEA			ATPase family associated with various cellular activities (AAA)	ko:K03924	-	-	-	-	ko00000,ko01000	-	AAA_3	1261.23	0.55121	0.17101	27.9853	0.000221246	0.000487011	1104.84	1223.97	1397.06	923.726	1427.79	1319.56	1175.07	1618.65
WP_259100860.1	acetate--CoA ligase				PFAM CoA-binding domain protein	ko:K01905,ko:K22224	ko00010,ko00620,ko00640,ko01100,ko01120,map00010,map00620,map00640,map01100,map01120	-	R00229,R00920	RC00004,RC00012,RC00014	ko00000,ko00001,ko01000,ko01004	-	ATP-grasp_5,Acetyltransf_3,CoA_binding_2,Succ_CoA_lig	1260.94	0.308176	0.258102	11.2819	0.126786	0.148027	1104.64	1460.25	1281.47	894.627	1528.12	1222.34	1324.33	1367.63
WP_018195064.1	site-specific DNA-methyltransferase	DNA binding|0003677||IEA,N-methyltransferase activity|0008170||IEA	DNA restriction-modification system|0009307||IEA		N-4 methylation of cytosine	ko:K00571,ko:K00590	-	-	-	-	ko00000,ko01000,ko02048	-	N6_N4_Mtase	1260.34	-0.352276	0.164055	37.4787	3.80604e-06	1.17635e-05	1186.6	1426	1150.25	1671.21	976.75	1257.08	1354.17	929.423
WP_259091861.1	porin												NADH dehydrogenase (ubiquinone) activity|0008137||IEA,quinone binding|0048038||IEA	1259.04	0.222647	0.181284	20.9066	0.0039109	0.00647037	1190.77	1284.42	1186.42	1096.5	1508.34	1522.76	952.978	1389.01
WP_259101375.1	hypothetical protein													1253.73	-0.0733043	0.182567	37.357	4.01397e-06	1.23639e-05	1159.78	1012.33	1205.11	1529.59	951.845	1167.41	1785.05	1101.91
WP_259102128.1	hypothetical protein				BNR repeat-like domain	-	-	-	-	-	-	-	-	1252.65	-0.218534	0.174047	59.0176	2.37057e-10	1.45293e-09	1083.5	949.775	1126.63	1738.06	1199.91	1180.05	1752.5	931.205
WP_259097438.1	endo-1%2C4-beta-xylanase	hydrolase activity%2C hydrolyzing O-glycosyl compounds|0004553||IEA	carbohydrate metabolic process|0005975||IEA	GH10	PFAM glycoside hydrolase, family 10	-	-	-	-	-	-	-	Glyco_hydro_10	1250.46	0.903767	0.322993	21.078	0.00365644	0.00608003	889.305	1382.55	1159.01	718.157	1628.92	1262.52	1395.06	1663.83
WP_259102161.1	anaerobic sulfatase maturase	oxidoreductase activity|0016491||IEA,4 iron%2C 4 sulfur cluster binding|0051539||IEA	peptidyl-serine modification|0018209||IEA,S-adenosylmethionine metabolic process|0046500||IEA		SEC-C motif	ko:K06871	-	-	-	-	ko00000	-	Fer4_12,Radical_SAM,SEC-C,SPASM	1249.12	-0.501876	0.179913	122.187	2.68313e-23	5.41122e-22	1230.49	695.575	985.593	2102.72	906.7	1247.41	1753.71	868.793
WP_259096052.1	amidohydrolase												catalytic activity|0003824||IEA,GTP binding|0005525||IEA	1249.05	0.155814	0.235962	12.1278	0.0964333	0.115235	1135.1	1468.3	1396.87	879.919	1381.3	1294.43	1265.5	1264.32
WP_259100492.1	hypothetical protein				restriction endodeoxyribonuclease activity	ko:K03924,ko:K07452	-	-	-	-	ko00000,ko01000,ko02048	-	AAA_3,AAA_5	1248.44	0.657134	0.112266	45.442	1.12233e-07	4.55749e-07	974.209	1336.53	1138.23	1101.8	1187.64	1343.36	1312.08	1536.64
WP_259102074.1	ATP-dependent DNA helicase RecG	nucleic acid binding|0003676||IEA,DNA helicase activity|0003678||IEA,ATP binding|0005524||IEA	DNA repair|0006281||IEA,DNA recombination|0006310||IEA		Critical role in recombination and DNA repair. Helps process Holliday junction intermediates to mature products by catalyzing branch migration. Has a DNA unwinding activity characteristic of a DNA helicase with a 3'- to 5'- polarity. Unwinds branched duplex DNA (Y-DNA)	ko:K03655	ko03440,map03440	-	-	-	ko00000,ko00001,ko01000,ko03400	-	DEAD,Helicase_C,RecG_wedge	1246.72	-0.156791	0.13842	4.66954	0.700218	0.711251	1307.16	1241.94	1149.71	1373.82	1181.06	1249.73	1244.11	1171.98
WP_259095340.1	hypothetical protein													1245.89	-0.238722	0.189708	26.2023	0.000463417	0.0009526	1203.74	1256.56	914.608	1607.94	984.592	1421.81	1360.73	1019.64
WP_018195747.1	type II secretion system F family protein				PFAM Bacterial type II secretion system protein F domain	ko:K02653	-	-	-	-	ko00000,ko02035,ko02044	3.A.15.2	T2SSF	1244.09	0.637647	0.189266	44.488	1.71898e-07	6.7251e-07	957.766	1775.71	1444.68	1087.01	1293.71	1081.82	905.523	1489.91
WP_259092367.1	FAD-dependent oxidoreductase	oxidoreductase activity|0016491||IEA			FAD-dependent pyridine nucleotide-disulfide oxidoreductase	ko:K17218	ko00920,map00920	-	R10152	RC03155	ko00000,ko00001,ko01000	-	Pyr_redox_2	1243.33	0.305734	0.12975	125.101	6.62471e-24	1.42352e-22	956.194	1086.99	925.737	1322.14	1074.01	1118.93	2118.41	1181.95
WP_259097317.1	AAA family ATPase				Associated with various cellular activities	ko:K03924	-	-	-	-	ko00000,ko01000	-	AAA_3	1242.89	-0.130564	0.141921	43.8822	2.25227e-07	8.60389e-07	1157.47	995.328	1162.43	1539.86	1193.14	1166.35	1628.44	1056.68
WP_259097651.1	hypothetical protein													1241.46	-0.905151	0.262335	68.3103	3.24088e-12	2.48927e-11	1516.11	614.026	715.151	1655.12	1029.78	1402.37	1943.74	809.355
WP_259093021.1	RbsD/FucU domain-containing protein	isomerase activity|0016853||IEA,monosaccharide binding|0048029||IEA	monosaccharide metabolic process|0005996||IEA		-	-	-	-	-	-	-	-	RbsD_FucU	1241.3	-0.0493309	0.193268	3.47211	0.83817	0.843545	1321.67	1217.15	1346.33	1076.45	1272.56	1195.17	1269.24	1277.27
WP_259101956.1	uroporphyrinogen decarboxylase family protein	uroporphyrinogen decarboxylase activity|0004853||IEA	porphyrin-containing compound biosynthetic process|0006779||IEA		Uroporphyrinogen decarboxylase (URO-D)	ko:K01599	ko00860,ko01100,ko01110,map00860,map01100,map01110	M00121	R03197,R04972	RC00872	ko00000,ko00001,ko00002,ko01000	-	URO-D	1240.77	-0.151686	0.2201	33.7856	1.88906e-05	5.15459e-05	1229.81	1225.05	1112.4	1829.32	883.241	1487.36	889.762	1107.24
WP_259094982.1	oligosaccharide flippase family protein													1238.13	0.298005	0.271743	83.8443	2.25948e-15	2.385e-14	1003.14	552.224	707.89	1183.85	948.556	1421.19	2581.88	1233
WP_259098769.1	hypothetical protein													1233.56	0.33433	0.220189	30.1171	9.03778e-05	0.000214084	957.929	1236.37	2186.08	1146.36	1188.09	1144.57	1104.02	1207.38
WP_259094860.1	hypothetical protein												methyltransferase activity|0008168||IEA,S-adenosyl-L-methionine binding|1904047||IEA	1233.42	0.506058	0.35426	19.1696	0.0076722	0.0118564	993.332	1056.95	1925.23	1452.14	1411.14	1232.04	675.772	1410.6
WP_259092851.1	glycoside hydrolase family 95 protein			GH95	Alpha-L-fucosidase	ko:K15923	ko00511,map00511	-	-	-	ko00000,ko00001,ko01000	-	Glyco_hyd_65N_2	1233.42	0.290406	0.161161	37.285	4.14218e-06	1.2737e-05	1151.96	904.173	1077.3	1026.44	1464.08	1310.71	1548.57	1408.96
WP_259099643.1	CTP synthase	CTP synthase activity|0003883||IEA	pyrimidine nucleotide biosynthetic process|0006221||IEA,CTP biosynthetic process|0006241||IEA		Catalyzes the ATP-dependent amination of UTP to CTP with either L-glutamine or ammonia as the source of nitrogen. Regulates intracellular CTP levels through interactions with the four ribonucleotide triphosphates	ko:K01937	ko00240,ko01100,map00240,map01100	M00052	R00571,R00573	RC00010,RC00074	ko00000,ko00001,ko00002,ko01000	-	CTP_synth_N,GATase	1231.62	0.0770537	0.161309	141.22	2.82179e-27	7.77607e-26	1075.11	2303.68	1526.4	1053.97	1151.5	974.426	704.031	1135.37
WP_259091934.1	HD domain-containing protein				HD domain	-	-	-	-	-	-	-	HD,Response_reg	1229.69	-0.790872	0.170243	113.191	1.99755e-21	3.50056e-20	1515.33	648.933	843.013	1513.45	1169.16	1305.88	1816.76	875.941
WP_259096245.1	heparinase II/III-family protein													1228.87	-0.106966	0.148608	34.7957	1.22176e-05	3.45926e-05	1171.83	1038.2	1567.01	1406.95	1255.19	1453.88	971.659	1087.74
WP_259100397.1	ASKHA domain-containing protein				Domain of unknown function (DUF4445)	-	-	-	-	-	-	-	DUF4445,Fer2	1228.17	0.496447	0.112943	47.7939	3.9067e-08	1.74403e-07	1086.32	1151.29	952.648	1306.15	1322.55	1348.02	1064.46	1533.55
WP_302898666.1	NADH dehydrogenase (quinone) subunit D	NADH dehydrogenase (quinone) activity|0050136||IEA			NDH-1 shuttles electrons from NADH, via FMN and iron- sulfur (Fe-S) centers, to quinones in the respiratory chain. The immediate electron acceptor for the enzyme in this species is believed to be ubiquinone. Couples the redox reaction to proton translocation (for every two electrons transferred, four hydrogen ions are translocated across the cytoplasmic membrane), and thus conserves the redox ene…	ko:K00333	ko00190,ko01100,map00190,map01100	M00144	R11945	RC00061	ko00000,ko00001,ko00002,ko01000	3.D.1	Complex1_49kDa	1227.15	0.683936	0.231736	36.5997	5.58461e-06	1.67307e-05	870.801	1465.92	1106.99	794.536	1087.94	1270.58	1735.15	1398.83
WP_259101380.1	phosphodiester glycosidase family protein													1226.62	0.424027	0.114411	43.1902	3.06514e-07	1.15142e-06	1047.34	952.985	1414.23	1239.21	1126.01	1279.78	1376.6	1405.82
WP_259098337.1	type II secretion system protein GspJ		protein secretion by the type II secretion system|0015628||IEA											1224.66	-0.0158872	0.231543	201.655	5.12085e-40	3.24321e-38	897.379	1405.48	4064.46	1057.42	830.461	1026.57	443.153	887.547
WP_259102126.1	FHA domain-containing protein												DNA binding|0003677||IEA	1223.58	-0.363873	0.167807	179.772	2.17646e-35	1.06176e-33	1154.05	576.289	853.685	2050.37	1016.25	1099.91	1948.93	896.744
WP_259094013.1	DUF6159 family protein													1222.82	-0.655285	0.227642	24.9238	0.000782776	0.00151437	1362.48	1461.71	1035.12	1521.97	883.36	1103.43	1373.91	864.845
WP_259095047.1	CARDB domain-containing protein													1217.36	0.241574	0.141106	57.7456	4.24848e-10	2.51015e-09	1199.92	1344.94	1529.84	1079.58	1410.01	1149.56	774.185	1419.23
WP_259093386.1	Rrf2 family transcriptional regulator				Transcriptional regulator	-	-	-	-	-	-	-	Rrf2	1215.11	-0.971188	0.240932	37.8282	3.26678e-06	1.01928e-05	1528.28	1151.49	855.305	1763.26	913.173	1365.32	1143.79	779.66
WP_259093193.1	TrpB-like pyridoxal phosphate-dependent enzyme	tryptophan synthase activity|0004834||IEA,pyridoxal phosphate binding|0030170||IEA	tryptophan biosynthetic process|0000162||IEA,tryptophan metabolic process|0006568||IEA		The beta subunit is responsible for the synthesis of L- tryptophan from indole and L-serine	ko:K06001	ko00260,ko00400,ko01100,ko01110,ko01130,ko01230,map00260,map00400,map01100,map01110,map01130,map01230	M00023	R00674,R02340,R02722	RC00209,RC00210,RC00700,RC00701,RC02868	ko00000,ko00001,ko00002,ko01000	-	PALP	1214.06	0.271359	0.229066	22.6893	0.00193043	0.00342282	1084.79	1625.1	1220.27	928.449	1578.22	1139.1	950.818	1309.17
WP_259101068.1	30S ribosomal protein S19	structural constituent of ribosome|0003735||IEA	translation|0006412||IEA		Protein S19 forms a complex with S13 that binds strongly to the 16S ribosomal RNA	ko:K02965	ko03010,map03010	M00178,M00179	-	-	br01610,ko00000,ko00001,ko00002,ko03011	-	Ribosomal_S19	1212.47	0.240633	0.267137	48.9418	2.32934e-08	1.08223e-07	1042.8	1972.8	1354.27	714.809	1523.72	1308.79	701.43	1232.14
WP_018196650.1	50S ribosomal protein L9	structural constituent of ribosome|0003735||IEA	translation|0006412||IEA		Binds to the 23S rRNA	ko:K02939	ko03010,map03010	M00178	-	-	br01610,ko00000,ko00001,ko00002,ko03011	-	Ribosomal_L9_C,Ribosomal_L9_N	1209.26	0.115806	0.190764	25.3879	0.000647515	0.00127734	1169.86	1713.47	1026.85	970.221	1191.57	1223.06	1045.33	1267.03
WP_020250226.1	response regulator		phosphorelay signal transduction system|0000160||IEA		HD domain	-	-	-	-	-	-	-	GAF_2,GGDEF,HD	1208.79	0.148353	0.291357	34.1703	1.60058e-05	4.42766e-05	900.093	758.904	1202.98	1398.07	1159.32	1137.03	2098.05	997.426
WP_259094609.1	aspartate carbamoyltransferase catalytic subunit	aspartate carbamoyltransferase activity|0004070||IEA,amino acid binding|0016597||IEA	'de novo' pyrimidine nucleobase biosynthetic process|0006207||IEA,amino acid metabolic process|0006520||IEA		Belongs to the ATCase OTCase family	ko:K00609	ko00240,ko00250,ko01100,map00240,map00250,map01100	M00051	R01397	RC00064,RC02850	ko00000,ko00001,ko00002,ko01000	-	OTCace,OTCace_N	1207.73	0.706256	0.307629	54.2516	2.09722e-09	1.12663e-08	794.189	2564.7	1230.01	991.722	1015.57	1009.94	703.401	1295.71
WP_259101274.1	proline--tRNA ligase	nucleotide binding|0000166||IEA,aminoacyl-tRNA editing activity|0002161||IEA,aminoacyl-tRNA ligase activity|0004812||IEA,proline-tRNA ligase activity|0004827||IEA,ATP binding|0005524||IEA	tRNA aminoacylation for protein translation|0006418||IEA,prolyl-tRNA aminoacylation|0006433||IEA		Catalyzes the attachment of proline to tRNA(Pro) in a two-step reaction proline is first activated by ATP to form Pro- AMP and then transferred to the acceptor end of tRNA(Pro). As ProRS can inadvertently accommodate and process non-cognate amino acids such as alanine and cysteine, to avoid such errors it has two additional distinct editing activities against alanine. One activity is designated a…	ko:K01881	ko00970,map00970	M00359,M00360	R03661	RC00055,RC00523	ko00000,ko00001,ko00002,ko01000,ko01007,ko03016	-	HGTP_anticodon,tRNA-synt_2b,tRNA_edit	1206.02	0.168443	0.155083	48.8855	2.38921e-08	1.10436e-07	1000.22	1241.37	850.592	1200.03	1084.13	1226.25	1762.35	1124.11
WP_259095767.1	glutamine-hydrolyzing GMP synthase	GMP synthase (glutamine-hydrolyzing) activity|0003922||IEA,ATP binding|0005524||IEA,pyrophosphatase activity|0016462||IEA	GMP biosynthetic process|0006177||IEA		Catalyzes the synthesis of GMP from XMP	ko:K01951	ko00230,ko00983,ko01100,map00230,map00983,map01100	M00050	R01230,R01231,R08244	RC00010,RC00204	ko00000,ko00001,ko00002,ko01000,ko01002	-	GATase,GMP_synt_C,NAD_synthase,tRNA_Me_trans	1204.77	-0.691517	0.203376	35.6094	8.58885e-06	2.50653e-05	1662.87	1474.19	903.927	990.228	1065.13	1413.76	951.73	1029.46
WP_020250216.1	isoprenyl transferase	transferase activity%2C transferring alkyl or aryl (other than methyl) groups|0016765||IEA			Catalyzes the condensation of isopentenyl diphosphate (IPP) with allylic pyrophosphates generating different type of terpenoids	ko:K00806	ko00900,ko01110,map00900,map01110	-	R06447	RC00279,RC02839	ko00000,ko00001,ko01000,ko01006	-	Prenyltransf	1204.57	-0.0634794	0.166936	8.12666	0.321558	0.345998	1149.58	1124.49	1111.04	1364.3	1117.65	1258.81	1351.3	1099.21
WP_259099941.1	bifunctional glutamate N-acetyltransferase/amino-acid acetyltransferase ArgJ	glutamate N-acetyltransferase activity|0004358||IEA	arginine biosynthetic process|0006526||IEA		Catalyzes two activities which are involved in the cyclic version of arginine biosynthesis the synthesis of N- acetylglutamate from glutamate and acetyl-CoA as the acetyl donor, and of ornithine by transacetylation between N(2)-acetylornithine and glutamate	ko:K00620	ko00220,ko01100,ko01110,ko01130,ko01210,ko01230,map00220,map01100,map01110,map01130,map01210,map01230	M00028	R00259,R02282	RC00004,RC00064	ko00000,ko00001,ko00002,ko01000	-	ArgJ	1201.12	0.298244	0.135507	62.5623	4.63827e-11	3.1833e-10	1167.43	1453.47	864.621	1024.13	1370.21	1362.1	876.657	1434.51
WP_259096578.1	hypothetical protein												hydrolase activity%2C acting on carbon-nitrogen (but not peptide) bonds|0016810||IEA	1197.01	-0.208204	0.150738	72.2121	5.27204e-13	4.44674e-12	1164.92	1052.96	774.047	1407.84	1075.48	1096.72	1814.32	1008.31
WP_018195487.1	S1 RNA-binding domain-containing protein	nucleic acid binding|0003676||IEA			Catalyzes the conversion of 1-hydroxy-2-methyl-2-(E)- butenyl 4-diphosphate (HMBPP) into a mixture of isopentenyl diphosphate (IPP) and dimethylallyl diphosphate (DMAPP). Acts in the terminal step of the DOXP MEP pathway for isoprenoid precursor biosynthesis	ko:K02945,ko:K03527	ko00900,ko01100,ko01110,ko01130,ko03010,map00900,map01100,map01110,map01130,map03010	M00096,M00178	R05884,R08210	RC01137,RC01487	br01610,ko00000,ko00001,ko00002,ko01000,ko03011	-	LYTB,S1	1196.89	0.12956	0.171009	13.5959	0.0588532	0.073414	1106.73	1345.4	1037.92	972.598	1400.67	1271.04	1245.11	1210.62
WP_018195406.1	30S ribosome-binding factor RbfA	rRNA binding|0019843||IEA	RNA processing|0006396||IEA		One of several proteins that assist in the late maturation steps of the functional core of the 30S ribosomal subunit. Associates with free 30S ribosomal subunits (but not with 30S subunits that are part of 70S ribosomes or polysomes). Required for efficient processing of 16S rRNA. May interact with the 5'-terminal helix region of 16S rRNA	ko:K02834	-	-	-	-	ko00000,ko03009	-	RBFA	1194.61	-0.745733	0.222923	47.3412	4.78864e-08	2.11074e-07	1520.2	920.96	737.215	1742.68	879.636	1380.9	1211.06	906.792
WP_259095090.1	protein translocase subunit SecF	protein-transporting ATPase activity|0015450||IEA	protein transport by the Sec complex|0043952||IEA		Part of the Sec protein translocase complex. Interacts with the SecYEG preprotein conducting channel. SecDF uses the proton motive force (PMF) to complete protein translocation after the ATP-dependent function of SecA	ko:K03074	ko03060,ko03070,map03060,map03070	M00335	-	-	ko00000,ko00001,ko00002,ko02044	2.A.6.4,3.A.5.2,3.A.5.7	SecD_SecF,Sec_GG	1193.09	0.542582	0.123977	263.169	4.34872e-53	8.26256e-51	931.492	2342.55	1162.64	865.66	1073.77	1027.7	734.746	1356.24
WP_259092315.1	methionine adenosyltransferase				PFAM S-adenosylmethionine synthetase (MAT)	ko:K00789	ko00270,ko01100,ko01110,ko01230,map00270,map01100,map01110,map01230	M00034,M00035,M00368,M00609	R00177,R04771	RC00021,RC01211	ko00000,ko00001,ko00002,ko01000	-	AdoMet_Synthase	1189.05	0.0125436	0.279642	52.5195	4.61171e-09	2.36818e-08	1313.15	428.992	1262.05	908.145	1477.59	1313.48	1605.2	1324.34
WP_259093244.1	peptide chain release factor 2	translation release factor activity|0003747||IEA	translational termination|0006415||IEA		Peptide chain release factor 2 directs the termination of translation in response to the peptide chain termination codons UGA and UAA	ko:K02836	-	-	-	-	ko00000,ko03012	-	PCRF,RF-1	1186.33	0.403556	0.223245	14.8413	0.0380883	0.0493889	939.161	1503.88	1219.25	957.602	1121.54	1144.25	1352.42	1241.93
WP_018195383.1	(2Fe-2S)-binding protein	metal ion binding|0046872||IEA,iron-sulfur cluster binding|0051536||IEA,2 iron%2C 2 sulfur cluster binding|0051537||IEA			Aerobic-type carbon monoxide dehydrogenase, small subunit CoxS	ko:K03518	-	-	R11168	RC02800	ko00000,ko01000	-	Fer2,Fer2_2	1184.03	0.695081	0.207056	23.9252	0.00117435	0.00217517	972.027	1377.02	1114.72	868.565	1163.06	1260.65	1112.6	1573.51
WP_259095306.1	adenylyl-sulfate kinase	adenylylsulfate kinase activity|0004020||IEA	sulfur compound metabolic process|0006790||IEA		Catalyzes the synthesis of activated sulfate	ko:K00390,ko:K00860,ko:K00958,ko:K13811	ko00230,ko00261,ko00450,ko00920,ko01100,ko01120,ko01130,map00230,map00261,map00450,map00920,map01100,map01120,map01130	M00176,M00596	R00509,R00529,R02021,R04928,R04929	RC00002,RC00007,RC00078,RC02809,RC02862,RC02889	ko00000,ko00001,ko00002,ko01000	-	APS_kinase,ATP-sulfurylase,PUA_2	1183.79	0.865962	0.792378	24.9061	0.000788424	0.00152285	968.328	1617.2	1312.87	252.506	2337.32	1388.51	256.48	1764.65
WP_259095781.1	NDP-sugar synthase				Nucleotidyl transferase	ko:K00966,ko:K16881	ko00051,ko00520,ko01100,ko01110,ko01130,map00051,map00520,map01100,map01110,map01130	M00114,M00361,M00362	R00885,R01818	RC00002,RC00408	ko00000,ko00001,ko00002,ko01000	-	Hexapep,NTP_transferase,PGM_PMM_I	1182.32	-0.356984	0.135586	106.49	4.90419e-20	7.69745e-19	1169.07	1175.44	845.893	1277.98	950.498	1010.53	1927.11	912.634
WP_259097634.1	NAD(P)-dependent oxidoreductase	NADP binding|0050661||IEA,NAD binding|0051287||IEA			NAD-binding of NADP-dependent 3-hydroxyisobutyrate dehydrogenase	ko:K00020	ko00280,ko01100,map00280,map01100	-	R05066	RC00099	ko00000,ko00001,ko01000	-	NAD_binding_11,NAD_binding_2	1178.92	-0.167552	0.142703	16.7335	0.0191979	0.0268309	1176.62	1237.64	1055.77	1433.75	1010.98	1234.58	1137.87	1047.08
WP_259096275.1	tetratricopeptide repeat protein												RNA endonuclease activity|0004521||IEA,protein binding|0005515||IEA	1177.95	-0.252997	0.184579	24.5442	0.000913645	0.00173228	1254.38	998.939	938.618	1350.78	922.867	1220.09	1520.59	1052.55
WP_259100215.1	5-deoxy-glucuronate isomerase	intramolecular oxidoreductase activity%2C interconverting aldoses and ketoses|0016861||IEA	inositol catabolic process|0019310||IEA		enzyme involved in inositol metabolism	ko:K03337	ko00562,ko01100,ko01120,map00562,map01100,map01120	-	R08503	RC00541	ko00000,ko00001,ko01000	-	KduI	1176.68	-0.0637236	0.20216	90.3896	1.02904e-16	1.22199e-15	993.865	2215.01	1362.62	764.77	1159.85	1230.96	792.058	950.652
WP_259096767.1	threonine synthase	threonine synthase activity|0004795||IEA	threonine biosynthetic process|0009088||IEA		Catalyzes the gamma-elimination of phosphate from L- phosphohomoserine and the beta-addition of water to produce L- threonine	ko:K01733	ko00260,ko00750,ko01100,ko01110,ko01120,ko01230,map00260,map00750,map01100,map01110,map01120,map01230	M00018	R01466,R05086	RC00017,RC00526	ko00000,ko00001,ko00002,ko01000	-	PALP	1175.09	0.198411	0.207501	22.8014	0.00184574	0.00328556	1101.35	1584.1	1311.3	958.872	1325.45	1033.91	917.654	1263.63
WP_259094735.1	glycogen synthase GlgA	glycogen (starch) synthase activity|0004373||IEA		GT5	Synthesizes alpha-1,4-glucan chains using ADP-glucose	ko:K00703	ko00500,ko01100,ko01110,ko02026,map00500,map01100,map01110,map02026	M00565	R02421	RC00005	ko00000,ko00001,ko00002,ko01000,ko01003	-	Glyco_transf_5,Glycos_transf_1,HHH_3	1174.78	0.950254	0.316335	19.9934	0.00558401	0.00890383	838.599	1232.89	1528.55	765.389	1342.9	1268.21	975.495	1620.13
WP_018195380.1	sigma-70 family RNA polymerase sigma factor	DNA binding|0003677||IEA,sigma factor activity|0016987||IEA	DNA-templated transcription initiation|0006352||IEA											1165.06	0.425018	0.184804	38.0269	2.99472e-06	9.39266e-06	799.054	1462.02	1597.05	985.463	1048.58	1143.82	1316.4	1073.23
WP_259102087.1	sulfatase				Pfam Sulfatase	-	-	-	-	-	-	-	Sulfatase	1163.48	0.0865786	0.15815	7.86118	0.344994	0.369454	1132.19	1176	991.246	1356.59	1181.82	1103.62	1112.22	1202.86
WP_259093374.1	serine--tRNA ligase	serine-tRNA ligase activity|0004828||IEA	seryl-tRNA aminoacylation|0006434||IEA		Catalyzes the attachment of serine to tRNA(Ser). Is also able to aminoacylate tRNA(Sec) with serine, to form the misacylated tRNA L-seryl-tRNA(Sec), which will be further converted into selenocysteinyl-tRNA(Sec)	ko:K01875	ko00970,map00970	M00359,M00360	R03662,R08218	RC00055,RC00523	ko00000,ko00001,ko00002,ko01000,ko01007,ko03016	-	Seryl_tRNA_N,tRNA-synt_2b	1163.41	0.155833	0.175889	7.1153	0.416974	0.439882	1122.8	1318.09	1145.54	1061.83	1173.93	1223.47	1008.91	1250.21
WP_259094236.1	hypothetical protein													1163.13	0.256488	0.23451	13.332	0.0644198	0.0797515	917.511	1035.19	1225	1245.8	955.277	1300.7	1481.16	1095.76
WP_259095733.1	M48 family metalloprotease	metalloendopeptidase activity|0004222||IEA	proteolysis|0006508||IEA		Peptidase family M48	-	-	-	-	-	-	-	Peptidase_M48,TPR_14,TPR_16,TPR_19	1161.83	-0.409932	0.202516	44.4874	1.71946e-07	6.7251e-07	1227.23	776.631	1011.17	1486.38	857.151	1287.19	1573.29	923.846
WP_259092037.1	inositol monophosphatase family protein													1157.57	-0.14172	0.16003	27.257	0.000299584	0.000639939	1217.33	930.082	990.299	1373.28	1055.92	1461.31	1039.6	1103.08
WP_259100512.1	aminotransferase class III-fold pyridoxal phosphate-dependent enzyme	transaminase activity|0008483||IEA,pyridoxal phosphate binding|0030170||IEA			Belongs to the class-III pyridoxal-phosphate-dependent aminotransferase family	ko:K09251	ko00330,ko01100,map00330,map01100	-	R01155	RC00006,RC00062	ko00000,ko00001,ko01000,ko01007	-	Aminotran_3	1156.47	0.475482	0.156802	40.65	9.44973e-07	3.25511e-06	931.761	1380.07	844.085	920.172	1195.39	1184.3	1410.32	1294.54
WP_302898664.1	aldo/keto reductase													1154.93	-0.518318	0.230632	140.665	3.68719e-27	1.00081e-25	1124.26	529.123	609.419	1411.23	858.851	1059.17	2582.15	784.695
WP_018195898.1	NADH-quinone oxidoreductase subunit D	oxidoreductase activity%2C acting on NAD(P)H|0016651||IEA,quinone binding|0048038||IEA,NAD binding|0051287||IEA			NDH-1 shuttles electrons from NADH, via FMN and iron- sulfur (Fe-S) centers, to quinones in the respiratory chain. The immediate electron acceptor for the enzyme in this species is believed to be ubiquinone. Couples the redox reaction to proton translocation (for every two electrons transferred, four hydrogen ions are translocated across the cytoplasmic membrane), and thus conserves the redox ene…	ko:K00333,ko:K13378	ko00190,ko01100,map00190,map01100	M00144	R11945	RC00061	ko00000,ko00001,ko00002,ko01000	3.D.1	Complex1_49kDa	1153.1	0.155886	0.274493	3.49216	0.836055	0.841847	958.114	1234.56	1150.37	1295.68	1184.01	1112.11	1231.97	1067.37
WP_259102265.1	response regulator		phosphorelay signal transduction system|0000160||IEA		phosphorelay signal transduction system	ko:K07315	-	-	-	-	ko00000,ko01000,ko03021	-	HTH_8,Mrr_cat,Response_reg,SpoIIE	1152.76	0.595951	0.211761	17.4495	0.0147169	0.0212598	944.768	1127.14	983.619	945.93	1042.4	1345.09	1312.57	1427.37
WP_259094080.1	cytochrome c oxidase subunit II	cytochrome-c oxidase activity|0004129||IEA			COGs COG1622 Heme copper-type cytochrome quinol oxidase subunit 2	ko:K02275	ko00190,ko01100,map00190,map01100	M00155	R00081	RC00016	ko00000,ko00001,ko00002,ko01000	3.D.4.2,3.D.4.4,3.D.4.6	COX2	1151	0.538434	0.201492	68.6922	2.71399e-12	2.10456e-11	952.851	1876.41	985.767	716.812	1060.48	1310.42	836.495	1383.5
WP_259096969.1	GTPase ObgE	GTPase activity|0003924||IEA			An essential GTPase which binds GTP, GDP and possibly (p)ppGpp with moderate affinity, with high nucleotide exchange rates and a fairly low GTP hydrolysis rate. Plays a role in control of the cell cycle, stress response, ribosome biogenesis and in those bacteria that undergo differentiation, in morphogenesis control	ko:K03979	-	-	-	-	ko00000,ko01000,ko03009	-	DUF1967,GTP1_OBG,MMR_HSR1	1149.79	0.269528	0.244665	12.8138	0.0767764	0.0933837	974.032	1208.31	1373.18	1039.19	1271.05	865.294	1408.23	1173.95
WP_259100264.1	nickel pincer cofactor biosynthesis protein LarC				Involved in the biosynthesis of a nickel-pincer cofactor ((SCS)Ni(II) pincer complex). Binds Ni(2 ), and functions in nickel delivery to pyridinium-3,5-bisthiocarboxylic acid mononucleotide (P2TMN), to form the mature cofactor. Is thus probably required for the activation of nickel-pincer cofactor- dependent enzymes	ko:K09121	-	-	-	-	ko00000,ko01000	-	DUF111	1149.19	0.541464	0.243226	12.646	0.0812174	0.0985478	995.802	1266.66	1391.54	1116.22	1125.97	1010.22	911.105	1449.04
WP_259098036.1	glycoside hydrolase family 127 protein			GH146	Beta-L-arabinofuranosidase, GH127	-	-	-	-	-	-	-	Glyco_hydro_127,RicinB_lectin_2	1146.95	0.100272	0.20994	40.7399	9.08218e-07	3.13748e-06	1095.53	638.913	1251.47	998.202	1388.19	1207.2	1537.22	1174.15
WP_259095715.1	glycine--tRNA ligase subunit alpha	glycine-tRNA ligase activity|0004820||IEA	glycyl-tRNA aminoacylation|0006426||IEA		PFAM glycyl-tRNA synthetase alpha subunit	ko:K01878	ko00970,map00970	M00360	R03654	RC00055,RC00523	ko00000,ko00001,ko00002,ko01000,ko01007,ko03016	-	tRNA-synt_2e	1145.27	0.170068	0.214852	6.15684	0.52156	0.541355	1007.09	1031.8	1208.49	1045.66	1316.51	1295.7	1202.15	1132.91
WP_259094992.1	alanine--glyoxylate aminotransferase family protein				Aminotransferase class-V	ko:K00436	-	-	R00700	-	ko00000,ko01000	-	Aminotran_5	1143.99	0.539117	0.253347	18.2418	0.0109252	0.0162171	934.319	1291.07	1006.71	749.493	1289.53	1293.37	1233.03	1357.19
WP_259096866.1	DNA translocase FtsK				DNA segregation ATPase FtsK SpoIIIE	ko:K03466	-	-	-	-	ko00000,ko03036	3.A.12	FtsK_4TM,FtsK_SpoIIIE,Ftsk_gamma	1143.52	0.0604043	0.150013	79.0419	2.15972e-14	2.06807e-13	1000.88	1929.26	1090.04	1046.32	1053.82	1024.18	912.914	1043.02
WP_259096122.1	hypothetical protein												5-formyltetrahydrofolate cyclo-ligase activity|0030272||IEA	1141.59	-0.665991	0.230621	140.91	3.27666e-27	8.96116e-26	1082.49	610.076	683.34	1884.69	526.523	1172.37	2133.39	682.096
WP_259094792.1	zf-TFIIB domain-containing protein													1140.64	0.38376	0.158224	22.5762	0.00201968	0.00356007	1107	1194.53	1285.01	933.794	1149.92	1088.02	973.673	1444.41
WP_259095083.1	uracil-DNA glycosylase	uracil DNA N-glycosylase activity|0004844||IEA,metal ion binding|0046872||IEA,4 iron%2C 4 sulfur cluster binding|0051539||IEA	DNA repair|0006281||IEA		Uracil DNA glycosylase superfamily	ko:K21929	ko03410,map03410	-	-	-	ko00000,ko00001,ko01000,ko03400	-	UDG	1140.26	-0.236961	0.163133	38.9694	1.98092e-06	6.43086e-06	1084.91	960.309	909.309	1485.07	960.394	1314.04	1350.84	920.283
WP_259094858.1	site-specific DNA-methyltransferase	DNA binding|0003677||IEA,N-methyltransferase activity|0008170||IEA	DNA restriction-modification system|0009307||IEA		N-4 methylation of cytosine	ko:K00590	-	-	-	-	ko00000,ko01000,ko02048	-	N6_N4_Mtase	1138.8	0.344401	0.184682	11.9762	0.101344	0.120544	1042.29	1082.64	1258.43	1265.66	1137.76	1129.46	910.352	1323.33
WP_259098969.1	Gfo/Idh/MocA family oxidoreductase	oxidoreductase activity|0016491||IEA,oxidoreductase activity%2C acting on NAD(P)H|0016651||IEA			Oxidoreductase	-	-	-	-	-	-	-	GFO_IDH_MocA,GFO_IDH_MocA_C	1138.06	0.107608	0.161003	84.9416	1.34749e-15	1.4608e-14	1218.5	1462.39	1424.83	972.603	1153.89	1089.4	570.398	1313.29
WP_018196853.1	M56 family metallopeptidase												molecular_function|0003674||IEA	1136.12	-0.0989361	0.208921	46.1307	8.24469e-08	3.46085e-07	1131.57	626.633	1182.65	1597.16	979	1388.11	1090.55	1056.4
WP_259101357.1	hypothetical protein												molecular_function|0003674||IEA	1135.64	-0.0411303	0.182901	33.66	1.99401e-05	5.4042e-05	1005.29	996.054	1024.9	1577.41	818.417	1244.96	1298.43	977.005
WP_259092258.1	hypothetical protein												pseudouridine synthase activity|0009982||IEA	1134.09	0.618159	0.266034	31.636	4.74361e-05	0.000119584	966.771	1233.35	1199.4	664.002	1564.81	1299.14	826.766	1483.85
WP_259099221.1	23S rRNA (adenine(2503)-C(2))-methyltransferase RlmN	S-adenosylmethionine-dependent methyltransferase activity|0008757||IEA,rRNA (adenine) methyltransferase activity|0016433||IEA	rRNA methylation|0031167||IEA		rRNA (adenine-C2-)-methyltransferase activity	ko:K06941	-	-	-	-	ko00000,ko01000,ko03009	-	Fer4_12,Fer4_14,Radical_SAM	1133.95	0.964566	0.303203	25.1226	0.000721757	0.00140158	815.046	1416.77	1378.13	750.458	1394.2	1007.44	887.301	1590.39
WP_259094718.1	hypothetical protein													1133.59	-0.155088	0.134899	44.6016	1.63398e-07	6.43958e-07	1033.67	1316.54	1413.38	1216.12	1059.14	869.4	1300.27	928.647
WP_259097595.1	sulfate adenylyltransferase	sulfate adenylyltransferase (ATP) activity|0004781||IEA			sulfate adenylyltransferase	ko:K00958	ko00230,ko00261,ko00450,ko00920,ko01100,ko01120,ko01130,map00230,map00261,map00450,map00920,map01100,map01120,map01130	M00176,M00596	R00529,R04929	RC02809,RC02889	ko00000,ko00001,ko00002,ko01000	-	ATP-sulfurylase,PUA_2	1132.85	1.08686	0.837976	34.6102	1.32374e-05	3.73044e-05	885.783	1248.78	1090.89	162.727	2596.97	1542.63	127.72	1881.34
WP_259097122.1	ATP-binding protein				HAMP (Histidine kinases, Adenylyl cyclases, Methyl binding proteins, Phosphatases) domain	ko:K07642	ko02020,map02020	M00450,M00645,M00646,M00648	-	-	ko00000,ko00001,ko00002,ko01000,ko01001,ko02022	-	HAMP,HATPase_c,HisKA	1132.43	0.863302	0.294489	27.2344	0.000302408	0.000645209	802.241	1392.9	1400.81	650.602	1371.44	952.3	1199.15	1459.14
WP_259096445.1	GAF domain-containing protein	protein binding|0005515||IEA												1130.92	0.104883	0.228906	45.1759	1.26418e-07	5.09339e-07	1047.37	1646.95	1480.12	654.492	1393.82	867.765	1034.7	1126.18
WP_259099536.1	tetratricopeptide repeat protein													1129.28	-1.76924	0.354915	207.952	2.37189e-41	1.74746e-39	1002.24	193.538	438.727	1953.18	406.709	892.068	3382.77	293.998
WP_259092290.1	phosphodiester glycosidase family protein				copper amine oxidase	-	-	-	-	-	-	-	Cu_amine_oxidN1,NAGPA	1128.09	-0.865731	0.232755	112.623	2.62078e-21	4.57054e-20	1419.83	438.168	736.795	1939.46	761.395	1250.89	1446.35	779.133
WP_259096033.1	S41 family peptidase	serine-type peptidase activity|0008236||IEA	proteolysis|0006508||IEA		Tricorn protease C1 domain	ko:K08676	-	-	-	-	ko00000,ko01000,ko01002	-	PD40,PDZ,PDZ_2,Peptidase_S41,Tricorn_C1,Tricorn_PDZ	1127.28	0.288731	0.15526	39.1143	1.85878e-06	6.07257e-06	1072.84	1294.1	1169.34	739.445	1334.27	1155.65	1025.2	1310.42
WP_259096050.1	amidohydrolase family protein	hydrolase activity|0016787||IEA												1126.57	0.159827	0.2403	10.9217	0.142072	0.163755	1003.46	1310.66	1227.52	822.895	1264.66	1248.43	1093.92	1120.73
WP_259102046.1	diaminopimelate decarboxylase	diaminopimelate decarboxylase activity|0008836||IEA	lysine biosynthetic process via diaminopimelate|0009089||IEA		Specifically catalyzes the decarboxylation of meso- diaminopimelate (meso-DAP) to L-lysine	ko:K01586	ko00300,ko01100,ko01110,ko01120,ko01130,ko01230,map00300,map01100,map01110,map01120,map01130,map01230	M00016,M00525,M00526,M00527	R00451	RC00299	ko00000,ko00001,ko00002,ko01000	-	Orn_Arg_deC_N,Orn_DAP_Arg_deC	1125.18	0.706658	0.315003	11.6725	0.111856	0.131832	851.45	1126.36	1062.48	810.176	1427.23	1289.91	1124.59	1389.05
WP_259094372.1	NADH-quinone oxidoreductase subunit L	NADH dehydrogenase (ubiquinone) activity|0008137||IEA	ATP synthesis coupled electron transport|0042773||IEA		NADH-Ubiquinone oxidoreductase (complex I), chain 5	ko:K00341	ko00190,ko01100,map00190,map01100	M00144	R11945	RC00061	ko00000,ko00001,ko00002,ko01000	3.D.1	Proton_antipo_C,Proton_antipo_M,Proton_antipo_N	1124.25	0.828582	0.320778	50.1783	1.33262e-08	6.40578e-08	774.085	1873.37	1480.3	523.629	1449.64	1051.32	694.011	1374.76
WP_259099051.1	deoxyguanosinetriphosphate triphosphohydrolase	triphosphoric monoester hydrolase activity|0016793||IEA			Belongs to the dGTPase family. Type 2 subfamily	ko:K01129	ko00230,map00230	-	R01856	RC00017	ko00000,ko00001,ko01000	-	HD,HD_assoc	1122.63	0.348045	0.189707	29.6457	0.000110271	0.000256658	944.551	782.419	1014.63	1256.67	1107.83	1140.39	1490.97	1202.67
WP_259096079.1	creatininase family protein				Creatinine amidohydrolase	ko:K01470	ko00330,map00330	-	R01884	RC00615	ko00000,ko00001,ko01000	-	Creatininase	1121.66	0.651408	0.276184	30.936	6.38864e-05	0.000156678	835.32	1681.57	1057.71	638.705	1198.55	1071.23	1182.95	1311.54
WP_259094763.1	Ig-like domain-containing protein													1117.52	-1.29733	0.247894	59.8354	1.62819e-10	1.03482e-09	1360.4	817.791	1015.34	972.399	928.814	1435.84	1759.35	553.239
WP_259094257.1	hypothetical protein													1117.02	-0.102652	0.16896	44.6067	1.63027e-07	6.43199e-07	1036.79	1709.89	930.031	979.614	892.097	1153.7	1130.93	965.806
WP_259099696.1	glycoside hydrolase family 78 protein			CBM67+GH78	Bacterial alpha-L-rhamnosidase 6 hairpin glycosidase domain	-	-	-	-	-	-	-	Bac_rhamnosid,Bac_rhamnosid6H	1116.36	0.22161	0.125378	66.1862	8.68261e-12	6.3629e-11	965.963	1451.95	1299.38	815.87	1377.6	1077.56	963.196	1127.43
WP_259095263.1	hypothetical protein													1115.79	-0.865267	0.29466	45.744	9.80393e-08	4.031e-07	1215.24	883.066	932.362	2087.06	760.621	888.916	1312.29	667.258
WP_259097445.1	Gfo/Idh/MocA family oxidoreductase	oxidoreductase activity|0016491||IEA,oxidoreductase activity%2C acting on NAD(P)H|0016651||IEA			Oxidoreductase family, NAD-binding Rossmann fold	-	-	-	-	-	-	-	GFO_IDH_MocA	1114.96	1.34827	0.431873	31.3924	5.2622e-05	0.000131192	617.279	1573.18	1234.43	393.376	1474.22	1122.18	1093.05	1571.53
WP_259094062.1	hypothetical protein												4-hydroxybenzoate octaprenyltransferase activity|0008412||IEA	1114.34	0.261861	0.202415	47.2767	4.92943e-08	2.16224e-07	983.031	1532.1	917.812	788.797	959.061	865.23	1573.16	1178.3
WP_259097037.1	phosphoribosylamine--glycine ligase	phosphoribosylamine-glycine ligase activity|0004637||IEA	'de novo' IMP biosynthetic process|0006189||IEA,purine ribonucleotide biosynthetic process|0009152||IEA		Belongs to the GARS family	ko:K01945	ko00230,ko01100,ko01110,ko01130,map00230,map01100,map01110,map01130	M00048	R04144	RC00090,RC00166	ko00000,ko00001,ko00002,ko01000	-	GARS_A,GARS_C,GARS_N	1111.73	0.566855	0.230164	10.7119	0.151687	0.174225	831.712	1263.38	1084.55	967.069	1231.7	1119.49	1195.54	1231.32
WP_259095186.1	FAD-linked oxidase C-terminal domain-containing protein	catalytic activity|0003824||IEA,flavin adenine dinucleotide binding|0050660||IEA		AA4	Glycolate oxidase subunit	ko:K00104	ko00630,ko01100,ko01110,ko01120,ko01130,map00630,map01100,map01110,map01120,map01130	-	R00475	RC00042	ko00000,ko00001,ko01000	-	FAD-oxidase_C,FAD_binding_4	1110.97	0.381269	0.179485	30.5756	7.44388e-05	0.000179269	905.871	1076.68	792.497	1124.31	977.953	1153.05	1527.82	1179.12
WP_259094997.1	UDP-N-acetylmuramate dehydrogenase	UDP-N-acetylmuramate dehydrogenase activity|0008762||IEA,FAD binding|0071949||IEA			Cell wall formation	ko:K00075	ko00520,ko00550,ko01100,map00520,map00550,map01100	-	R03191,R03192	RC02639	ko00000,ko00001,ko01000,ko01011	-	FAD_binding_4,MurB_C	1110.26	0.546332	0.1791	31.3302	5.40324e-05	0.000134337	914.663	1215.1	712.856	1081.33	948.369	1178.07	1310.11	1335.15
WP_018196641.1	hypothetical protein													1105.6	-0.0214271	0.139538	37.6846	3.47852e-06	1.07789e-05	1131.41	953.235	768.418	1381.33	977.965	1259.31	1103.96	1114.2
WP_259101934.1	TIM barrel protein				myo-inosose-2 dehydratase activity	-	-	-	-	-	-	-	AP_endonuc_2	1103.93	0.759504	0.416686	17.9716	0.0120987	0.0177474	802.923	1018.89	1191.34	531.142	1715.49	1160.54	1284.96	1359.14
WP_259094744.1	hypothetical protein				Periplasmic component of the Tol biopolymer transport system	ko:K03641	-	-	-	-	ko00000,ko02000	2.C.1.2	PA,PD40,PDZ_2,Peptidase_M28	1103.65	0.595106	0.204399	28.5396	0.000175497	0.000395225	871.513	1069.54	1238.61	875.69	1318.67	1400.09	856.047	1315.7
WP_259092421.1	Stp1/IreP family PP2C-type Ser/Thr phosphatase	protein serine/threonine phosphatase activity|0004722||IEA	protein dephosphorylation|0006470||IEA		protein phosphatase 2C domain protein	ko:K20074	-	-	-	-	ko00000,ko01000,ko01009	-	PP2C,PP2C_2	1102.45	-0.421891	0.117271	42.3983	4.35784e-07	1.59068e-06	1132.64	1029.83	949.824	1222.05	1043.57	1207.11	1319.05	845.016
WP_259101106.1	30S ribosomal protein S13	structural constituent of ribosome|0003735||IEA	translation|0006412||IEA		Located at the top of the head of the 30S subunit, it contacts several helices of the 16S rRNA. In the 70S ribosome it contacts the 23S rRNA (bridge B1a) and protein L5 of the 50S subunit (bridge B1b), connecting the 2 subunits	ko:K02952	ko03010,map03010	M00178,M00179	-	-	br01610,ko00000,ko00001,ko00002,ko03011	-	Ribosomal_S13	1101.58	0.201929	0.190381	16.4707	0.021147	0.0292269	949.728	1387.51	961.365	890.426	1207.89	1175.91	1136.62	1091.88
WP_259094743.1	hypothetical protein													1100.47	0.370254	0.246517	21.1003	0.00362447	0.00603521	967.196	1099.57	1300.72	837.427	1383.3	1348.23	778.573	1249.74
WP_259095754.1	ribose 5-phosphate isomerase B	ribose-5-phosphate isomerase activity|0004751||IEA	pentose-phosphate shunt%2C non-oxidative branch|0009052||IEA		Ribose/Galactose Isomerase	ko:K01808	ko00030,ko00051,ko00710,ko01100,ko01110,ko01120,ko01130,ko01200,ko01230,map00030,map00051,map00710,map01100,map01110,map01120,map01130,map01200,map01230	M00004,M00007,M00165,M00167	R01056,R09030	RC00376,RC00434	ko00000,ko00001,ko00002,ko01000	-	LacAB_rpiB	1098.68	-0.883221	0.235907	119.35	1.04635e-22	2.03082e-21	1175.16	534.27	688.578	1445.64	717.456	1131.66	2195.77	637.158
WP_259097418.1	PD-(D/E)XK nuclease family protein													1098.63	-0.0328848	0.138161	39.3595	1.66884e-06	5.50185e-06	1039.07	780.575	1086.83	1275.64	1122.66	1126.25	1347.08	1015.01
WP_259101125.1	hypothetical protein													1095.21	0.336307	0.201356	14.9166	0.0370837	0.0482248	948.997	1109.94	1539.31	1015.04	1130.67	1037.76	942.16	1197.66
WP_259099266.1	Asp-tRNA(Asn)/Glu-tRNA(Gln) amidotransferase subunit GatB	carbon-nitrogen ligase activity%2C with glutamine as amido-N-donor|0016884||IEA			Allows the formation of correctly charged Asn-tRNA(Asn) or Gln-tRNA(Gln) through the transamidation of misacylated Asp- tRNA(Asn) or Glu-tRNA(Gln) in organisms which lack either or both of asparaginyl-tRNA or glutaminyl-tRNA synthetases. The reaction takes place in the presence of glutamine and ATP through an activated phospho-Asp-tRNA(Asn) or phospho-Glu-tRNA(Gln)	ko:K02434	ko00970,ko01100,map00970,map01100	-	R03905,R04212	RC00010	ko00000,ko00001,ko01000,ko03029	-	GatB_N,GatB_Yqey	1094.99	-0.0278574	0.152585	43.7882	2.34861e-07	8.93411e-07	978.665	1517.99	939.569	862.531	1128.71	1284.27	1049.25	958.397
WP_259096587.1	dCTP deaminase	dCTP deaminase activity|0008829||IEA	2'-deoxyribonucleotide metabolic process|0009394||IEA		Belongs to the dCTP deaminase family	ko:K01494	ko00240,ko01100,map00240,map01100	M00053	R00568,R02325	RC00074	ko00000,ko00001,ko00002,ko01000	-	dUTPase	1094.23	0.872345	0.406342	16.4495	0.0213121	0.0294326	733.502	1213.22	1341.76	659.328	1376.24	1453.25	810.625	1342.46
WP_259094515.1	Uma2 family endonuclease	nucleic acid binding|0003676||IEA,endonuclease activity|0004519||IEA			Psort location Cytoplasmic, score 8.96	-	-	-	-	-	-	-	Uma2	1092.83	-0.00667921	0.155369	32.4771	3.31236e-05	8.6026e-05	1104.88	759.525	1132.66	1351.92	931.471	1165.14	1157.55	1098.98
WP_259101425.1	hypothetical protein												glycosyltransferase activity|0016757||IEA	1089.43	0.439616	0.171539	73.0039	3.64379e-13	3.14691e-12	869.846	972.438	814.634	1043.03	852.109	954.035	1859.28	1179.36
WP_259094909.1	sugar phosphate isomerase/epimerase family protein	catalytic activity|0003824||IEA			xylose isomerase	-	-	-	-	-	-	-	AP_endonuc_2	1088.95	0.490486	0.245853	12.4925	0.085483	0.103278	842.148	1175.66	1093.29	833.581	1244.31	1287.77	1105.51	1182.53
WP_018195943.1	F0F1 ATP synthase subunit B	proton-transporting ATP synthase activity%2C rotational mechanism|0046933||IEA	proton motive force-driven ATP synthesis|0015986||IEA		Component of the F(0) channel, it forms part of the peripheral stalk, linking F(1) to F(0)	ko:K02109	ko00190,ko00195,ko01100,map00190,map00195,map01100	M00157	-	-	ko00000,ko00001,ko00002,ko00194	3.A.2.1	ATP-synt_B	1086.69	0.820445	0.363172	29.3081	0.000127113	0.000292279	770.412	1540.27	1300.31	504.187	1476.37	1129.13	813.344	1360.57
WP_259094093.1	hypothetical protein													1084.24	0.323142	0.262515	19.3545	0.0071465	0.0111298	785.621	1397.21	1346.95	1011.69	1102.79	1315.92	825.041	982.454
WP_259101588.1	hypothetical protein												iron-sulfur cluster binding|0051536||IEA	1084.08	-0.570706	0.3388	21.3713	0.00325777	0.00549558	1696.8	1103.73	1234.24	923.348	807.793	1104.95	616.873	1142.82
WP_259100128.1	histidinol-phosphate transaminase	histidinol-phosphate transaminase activity|0004400||IEA	histidine biosynthetic process|0000105||IEA		Belongs to the class-II pyridoxal-phosphate-dependent aminotransferase family. Histidinol-phosphate aminotransferase subfamily	ko:K00817	ko00340,ko00350,ko00360,ko00400,ko00401,ko00960,ko01100,ko01110,ko01130,ko01230,map00340,map00350,map00360,map00400,map00401,map00960,map01100,map01110,map01130,map01230	M00026	R00694,R00734,R03243	RC00006,RC00888	ko00000,ko00001,ko00002,ko01000,ko01007	-	Aminotran_1_2	1083.67	0.752709	0.295928	13.7397	0.0560092	0.0703037	744.043	1033.21	1188.26	951.231	1155.23	945.682	1457	1253.39
WP_259094429.1	glycosyltransferase	glycosyltransferase activity|0016757||IEA		GT4	PFAM Glycosyl transferases group 1	-	-	-	-	-	-	-	Glyco_transf_4,Glycos_transf_1	1078.86	-0.140649	0.19396	132.084	2.30565e-25	5.51218e-24	1030.17	423.094	608.2	1505.3	1117.77	1227.28	1641.51	933.627
WP_259095482.1	DUF1559 domain-containing protein				Required for transformation and DNA binding	ko:K02245,ko:K02456	ko03070,ko05111,map03070,map05111	M00331,M00429	-	-	ko00000,ko00001,ko00002,ko02044	3.A.15	N_methyl	1078.67	-0.328368	0.199556	69.4968	1.86715e-12	1.48467e-11	1011.71	1838.02	1448.79	732.733	888.785	941.966	1021.56	805.876
WP_259100422.1	aldo/keto reductase	oxidoreductase activity%2C acting on the CH-OH group of donors%2C NAD or NADP as acceptor|0016616||IEA			Aldo Keto reductase	ko:K07079	-	-	-	-	ko00000	-	Aldo_ket_red	1074.97	-0.367666	0.151499	49.044	2.22432e-08	1.03744e-07	1229.8	1226.54	770.763	907.163	936.963	964.482	1464.11	952.547
WP_259097452.1	Gfo/Idh/MocA family oxidoreductase	oxidoreductase activity|0016491||IEA			PFAM Oxidoreductase family, NAD-binding Rossmann fold	-	-	-	-	-	-	-	GFO_IDH_MocA	1072.18	0.852232	0.40246	23.6983	0.00128712	0.00236946	752.531	1573.75	1175.86	475.686	1387.01	1055.92	937.668	1358.51
WP_259099073.1	Gfo/Idh/MocA family oxidoreductase	oxidoreductase activity|0016491||IEA,oxidoreductase activity%2C acting on NAD(P)H|0016651||IEA			inositol 2-dehydrogenase activity	-	-	-	-	-	-	-	GFO_IDH_MocA,GFO_IDH_MocA_C	1072.04	0.504224	0.160654	36.7374	5.25956e-06	1.5902e-05	902.143	980.088	974.511	1030.63	1371.21	1292.78	811.982	1280.16
WP_259100286.1	AIR synthase family protein				Hydrogenase expression formation protein (HypE)	ko:K04655	-	-	-	-	ko00000	-	AIRS,AIRS_C	1071.78	0.492215	0.272734	58.524	2.97327e-10	1.81004e-09	716.716	1992.38	1447.7	572.4	1048.5	1007.52	898.562	1008
WP_302898646.1	GreA/GreB family elongation factor	DNA binding|0003677||IEA	regulation of DNA-templated transcription elongation|0032784||IEA		Necessary for efficient RNA polymerase transcription elongation past template-encoded arresting sites. The arresting sites in DNA have the property of trapping a certain fraction of elongating RNA polymerases that pass through, resulting in locked ternary complexes. Cleavage of the nascent transcript by cleavage factors such as GreA or GreB allows the resumption of elongation from the new 3'termi…	ko:K03624	-	-	-	-	ko00000,ko03021	-	GreA_GreB,GreA_GreB_N	1069.83	-0.086153	0.216031	44.9963	1.36984e-07	5.47634e-07	1038.39	1771.6	719.034	900.733	879.532	883.627	1207.16	978.173
WP_259099547.1	PilT/PilU family type 4a pilus ATPase	ATP binding|0005524||IEA	type IV pilus-dependent motility|0043107||IEA		twitching motility protein	ko:K02669	-	-	-	-	ko00000,ko02035,ko02044	3.A.15.2	T2SSE	1068.07	-0.854656	0.261057	157.56	1.04633e-30	3.56344e-29	1103.73	263.498	769.616	2046.64	731.239	979.837	1828.02	610.199
WP_259099678.1	hypothetical protein				Protein of unknown function (DUF2961)	-	-	-	-	-	-	-	DUF2961	1064.9	0.63888	0.189777	42.6931	3.82311e-07	1.41263e-06	783.153	1566.36	966.269	856.024	1187.06	1073.58	875.603	1219.01
WP_259101402.1	UxaA family hydrolase				Altronate dehydratase	ko:K01685,ko:K01708	ko00040,ko00053,ko01100,map00040,map00053,map01100	M00631	R01540,R05608	RC00543	ko00000,ko00001,ko00002,ko01000	-	GD_AH_C,SAF	1064.79	0.227213	0.253097	8.83582	0.26466	0.289785	873.022	951.875	1411.9	1230.08	1109.57	999.834	1051.01	1021.64
WP_259092369.1	N-6 DNA methylase	DNA binding|0003677||IEA,N-methyltransferase activity|0008170||IEA	DNA methylation|0006306||IEA		site-specific DNA-methyltransferase (adenine-specific) activity	-	-	-	-	-	-	-	AAA_34,MTS,Methylase_S,N6_Mtase	1063.37	-0.00362184	0.136528	16.8965	0.0180759	0.0254799	1014.31	1062.96	1038.12	986.191	1145.29	947.147	1319.4	1012.41
WP_259093944.1	porphobilinogen synthase	catalytic activity|0003824||IEA,porphobilinogen synthase activity|0004655||IEA,metal ion binding|0046872||IEA	tetrapyrrole biosynthetic process|0033014||IEA		Delta-aminolevulinic acid dehydratase	ko:K01698	ko00860,ko01100,ko01110,ko01120,map00860,map01100,map01110,map01120	M00121	R00036	RC00918,RC01781	ko00000,ko00001,ko00002,ko01000,ko04147	-	ALAD	1060.79	-0.105085	0.156026	35.2905	9.86239e-06	2.83691e-05	1076.87	1186.08	822.545	1377.84	813.183	894.11	1153.42	1000.33
WP_259095048.1	hypothetical protein													1059.86	0.0284553	0.199211	21.3288	0.00331279	0.00557798	904.223	1177.79	1249.55	921.372	1033.24	1411.9	913.429	921.748
WP_259101129.1	hypothetical protein													1059.69	0.658921	0.301225	18.8283	0.00874247	0.0133054	793.292	1236.16	1675.82	842.836	1143.65	861.675	904.905	1252.55
WP_259100868.1	1-deoxy-D-xylulose-5-phosphate reductoisomerase	protein binding|0005515||IEA,1-deoxy-D-xylulose-5-phosphate reductoisomerase activity|0030604||IEA,metal ion binding|0046872||IEA,NADPH binding|0070402||IEA	isoprenoid biosynthetic process|0008299||IEA		Catalyzes the NADP-dependent rearrangement and reduction of 1-deoxy-D-xylulose-5-phosphate (DXP) to 2-C-methyl-D-erythritol 4-phosphate (MEP)	ko:K00099	ko00900,ko01100,ko01110,ko01130,map00900,map01100,map01110,map01130	M00096	R05688	RC01452	ko00000,ko00001,ko00002,ko01000	-	DXPR_C,DXP_redisom_C,DXP_reductoisom	1057.18	0.49445	0.267363	13.4356	0.0621809	0.0771916	879.565	1205.33	1176.2	778.132	1344.82	1057.57	912.192	1239.16
WP_259095253.1	hypothetical protein													1054.8	-0.8432	0.299289	38.2028	2.77268e-06	8.74946e-06	1154.37	1201.43	801.427	1610.71	514.76	943.902	1303.92	643.423
WP_259101212.1	DUF1385 domain-containing protein				metal-dependent enzyme	-	-	-	-	-	-	-	CBS,DUF1385	1053.29	-0.279907	0.209346	11.4769	0.119127	0.139823	1171.31	1228.75	829.047	1034.79	833.957	1151.78	1064.01	964.774
WP_259097012.1	hypothetical protein			GH99	Glycosyl hydrolase family 99	-	-	-	-	-	-	-	Glyco_hydro_99	1052.62	0.372363	0.212079	11.1424	0.132527	0.153982	887.103	1170.52	1216.94	827.895	1120.37	1103.75	1023.06	1148.69
WP_018196526.1	sulfurtransferase TusA family protein				Belongs to the sulfur carrier protein TusA family	-	-	-	-	-	-	-	TusA	1050.7	-0.593955	0.238715	38.8057	2.12859e-06	6.8609e-06	1124.97	1455.51	1517.26	1142.92	696.658	995.871	764.216	745.734
WP_259094841.1	radical SAM protein	catalytic activity|0003824||IEA,4 iron%2C 4 sulfur cluster binding|0051539||IEA,S-adenosyl-L-methionine binding|1904047||IEA			PFAM Radical SAM	-	-	-	-	-	-	-	B12-binding,Radical_SAM	1046.32	1.35508	0.359558	39.4596	1.59692e-06	5.28402e-06	651.579	1165.13	1480.36	496.714	1382.63	1118.6	665.68	1666.65
WP_259094659.1	hypothetical protein													1045.62	0.684844	0.400323	13.9411	0.052239	0.0660073	753.426	1335.86	1406.45	594.754	1233.48	994.168	1018.84	1210.89
WP_259096143.1	MFS transporter	transmembrane transporter activity|0022857||IEA	transmembrane transport|0055085||IEA		Nucleoside H+ symporter	-	-	-	-	-	-	-	Nuc_H_symport	1044.64	0.600983	0.244053	102.748	2.91808e-19	4.26489e-18	702.005	2079.6	1114.29	436.901	1338.49	997.6	745.021	1064.36
WP_259097512.1	acyl carrier protein	acyl carrier activity|0000036||IEA	fatty acid biosynthetic process|0006633||IEA		Carrier of the growing fatty acid chain in fatty acid biosynthesis	ko:K02078	-	-	-	-	ko00000,ko00001	-	PP-binding	1042.46	1.30932	0.569322	20.779	0.00411139	0.00676796	599.024	1442.39	967.279	308.669	1207.77	1041.27	1318.98	1484.34
WP_259102392.1	hypothetical protein												protein binding|0005515||IEA	1041.78	-1.31261	0.363506	64.4058	1.97953e-11	1.40671e-10	1208.7	2117.74	382.37	1350.38	466.424	958.13	952.31	486.626
WP_259094777.1	TIGR02710 family CRISPR-associated CARF protein	molecular_function|0003674||IEA	maintenance of CRISPR repeat elements|0043571||IEA		TIGRFAM CRISPR-associated protein, TIGR02710 family	-	-	-	-	-	-	-	Cas_Cas02710	1040.65	-0.0383694	0.144847	30.2094	8.69173e-05	0.000206565	993.324	1111.98	1535.75	1000.92	904.766	973.275	958.494	966.449
WP_259095418.1	hypothetical protein													1039.9	-0.240988	0.188188	101.126	6.31497e-19	9.01069e-18	1156.27	445.407	730.083	1362.46	859.395	1207.1	1416.62	978.424
WP_259094046.1	NAD(P)/FAD-dependent oxidoreductase	oxidoreductase activity|0016491||IEA			Flavin containing amine oxidoreductase	-	-	-	-	-	-	-	Amino_oxidase	1039.6	0.243094	0.166786	213.29	1.75011e-42	1.46928e-40	826.273	1994.54	1713.2	714.584	900.809	896.962	471.222	977.492
WP_259100599.1	DUF4091 domain-containing protein													1039.47	0.0820898	0.167364	21.8959	0.00264756	0.0045566	953.856	811.849	1087.92	971.647	1050.97	1099.56	1350.07	1009.87
WP_302898695.1	MBL fold metallo-hydrolase				Beta-lactamase superfamily domain	ko:K03476	ko00053,ko01100,ko01120,map00053,map01100,map01120	M00550	R07677	RC02793	ko00000,ko00001,ko00002,ko01000	-	Lactamase_B_2,Lactamase_B_3	1038.85	0.608043	0.233656	11.4429	0.120434	0.141158	835.026	921.947	1195.25	988.449	1135.45	1139.15	907.439	1272.4
WP_259092898.1	GDP-mannose 4%2C6-dehydratase				Male sterility protein	ko:K08679	ko00520,ko01100,map00520,map01100	-	R01385	RC00289	ko00000,ko00001,ko01000	-	GDP_Man_Dehyd	1038.36	-0.268938	0.247807	27.8577	0.00023334	0.00051083	1102.28	649.74	743.982	1054.42	1298.92	1146.69	1384.77	914.796
WP_259095424.1	excinuclease ABC subunit UvrC	excinuclease ABC activity|0009381||IEA	nucleotide-excision repair|0006289||IEA		The UvrABC repair system catalyzes the recognition and processing of DNA lesions. UvrC both incises the 5' and 3' sides of the lesion. The N-terminal half is responsible for the 3' incision and the C-terminal half is responsible for the 5' incision	ko:K03703	ko03420,map03420	-	-	-	ko00000,ko00001,ko03400	-	GIY-YIG,HHH_2,HHH_5,UVR,UvrC_HhH_N	1037.07	-0.514663	0.169686	105.218	8.99633e-20	1.39385e-18	1142.25	606.403	916.809	1821.62	857.518	1028.48	1023.96	799.609
WP_259091990.1	iron dependent repressor%2C metal binding and dimerization domain protein				PFAM iron dependent repressor	ko:K03709	-	-	-	-	ko00000,ko03000	-	Fe_dep_repr_C,FeoA	1037.01	0.281978	0.222972	63.8229	2.59169e-11	1.80967e-10	823.361	668.047	756.44	1054.05	791.235	1160.49	1866.23	1000.78
WP_018196184.1	50S ribosomal protein L28	structural constituent of ribosome|0003735||IEA	translation|0006412||IEA		Belongs to the bacterial ribosomal protein bL28 family	ko:K02902	ko03010,map03010	M00178	-	-	br01610,ko00000,ko00001,ko00002,ko03011	-	Ribosomal_L28	1035.67	0.286556	0.185136	89.5439	1.535e-16	1.78753e-15	865.29	1865.63	705.813	756.729	1046.76	1138.5	745.427	1054.98
WP_259093323.1	hypothetical protein													1035.43	-0.218584	0.167308	27.1051	0.000319076	0.000677169	1207.68	1011.28	885.282	1355.13	898.46	964.571	827.169	1038.16
WP_259094942.1	(Fe-S)-binding protein	metal ion binding|0046872||IEA,iron-sulfur cluster binding|0051536||IEA			Cysteine-rich domain	ko:K11473	ko00630,ko01100,ko01110,ko01120,ko01130,map00630,map01100,map01110,map01120,map01130	-	R00475	RC00042	ko00000,ko00001	-	CCG,Fer4_17,Fer4_7,Fer4_8	1034.97	0.164636	0.213	41.6546	6.06007e-07	2.15748e-06	848.321	618.219	1059.12	1174	934.935	1196.97	1472.45	950.436
WP_259092383.1	leucyl aminopeptidase	metalloaminopeptidase activity|0070006||IEA	proteolysis|0006508||IEA		Presumably involved in the processing and regular turnover of intracellular proteins. Catalyzes the removal of unsubstituted N-terminal amino acids from various peptides	ko:K01255	ko00480,ko01100,map00480,map01100	-	R00899,R04951	RC00096,RC00141	ko00000,ko00001,ko01000,ko01002	-	Peptidase_M17,Peptidase_M17_N	1030.58	0.276572	0.250924	15.1823	0.0337325	0.0442494	876.975	981.48	911.262	739.233	1290.59	1218.61	1211.38	1062.02
WP_259094750.1	NAD(P)H-hydrate dehydratase	ADP-dependent NAD(P)H-hydrate dehydratase activity|0052855||IEA			Bifunctional enzyme that catalyzes the epimerization of the S- and R-forms of NAD(P)HX and the dehydration of the S-form of NAD(P)HX at the expense of ADP, which is converted to AMP. This allows the repair of both epimers of NAD(P)HX, a damaged form of NAD(P)H that is a result of enzymatic or heat-dependent hydration	ko:K17758,ko:K17759	-	-	-	-	ko00000,ko01000	-	ACPS,Carb_kinase,YjeF_N	1029.61	0.779095	0.283416	32.2009	3.72769e-05	9.61899e-05	683.532	1601.44	1302.39	751.79	1173.8	918.755	771.359	1172.83
WP_259096155.1	hypothetical protein				Responsible for removing an oxidatively damaged form of guanine (7,8-dihydro-8-oxoguanine 7-oxoG) from DNA. Also nicks DNA at apurinic apyrimidinic sites (AP sites)	ko:K03653	-	-	-	-	ko00000,ko01000	-	-	1028.79	0.281239	0.202677	23.5202	0.00138296	0.00253169	882.36	1189.24	1404.99	940.466	1019.37	1109.06	734.679	1072.45
WP_259094974.1	glycosyltransferase family 4 protein	glycosyltransferase activity|0016757||IEA		GT4	glycosyl transferase group 1	-	-	-	-	-	-	-	Glycos_transf_1	1027.26	0.223768	0.276709	73.1372	3.42394e-13	2.96413e-12	840.004	501.11	658.429	870.788	959.271	1072.76	2189.44	980.663
WP_259096599.1	N-acetyl-gamma-glutamyl-phosphate reductase	N-acetyl-gamma-glutamyl-phosphate reductase activity|0003942||IEA	ornithine biosynthetic process|0006592||IEA		Catalyzes the NADPH-dependent reduction of N-acetyl-5- glutamyl phosphate to yield N-acetyl-L-glutamate 5-semialdehyde	ko:K00145	ko00220,ko01100,ko01110,ko01130,ko01210,ko01230,map00220,map01100,map01110,map01130,map01210,map01230	M00028,M00845	R03443	RC00684	ko00000,ko00001,ko00002,ko01000	-	Semialdhyde_dh,Semialdhyde_dhC	1026.57	0.386782	0.189269	25.4673	0.000626794	0.00123985	862.694	1246.19	1166.07	943.408	1123.69	1103.89	718.201	1127.31
WP_259100882.1	zinc ribbon domain-containing protein				TIGRFAM transposase, IS605 OrfB family, central region	-	-	-	-	-	-	-	OrfB_IS605,OrfB_Zn_ribbon	1025.74	-0.184961	0.309645	46.8437	5.98793e-08	2.55212e-07	966.672	744.173	416.98	1464.55	598.839	1291.77	1527.58	850.106
WP_259099214.1	sigma-70 family RNA polymerase sigma factor	DNA binding|0003677||IEA,DNA-binding transcription factor activity|0003700||IEA,sigma factor activity|0016987||IEA	DNA-templated transcription initiation|0006352||IEA,regulation of DNA-templated transcription|0006355||IEA		Sigma factors are initiation factors that promote the attachment of RNA polymerase to specific initiation sites and are then released. This sigma factor is the primary sigma factor during exponential growth	ko:K03086	-	-	-	-	ko00000,ko03021	-	Sigma70_r1_1,Sigma70_r1_2,Sigma70_r2,Sigma70_r3,Sigma70_r4	1025.63	0.132921	0.131665	109.336	1.26116e-20	2.09806e-19	843.403	705.175	968.399	1423.51	894.387	921.526	1461.59	924.239
WP_259095375.1	galactitol-1-phosphate 5-dehydrogenase				alcohol dehydrogenase	ko:K00008	ko00040,ko00051,ko01100,map00040,map00051,map01100	M00014	R00875,R01896	RC00085,RC00102	ko00000,ko00001,ko00002,ko01000	-	ADH_N,ADH_zinc_N	1024.82	0.699569	0.23486	21.1655	0.00353273	0.00589878	807.108	1154.29	986.518	700.505	1114.22	992.465	1150.06	1310.45
WP_259094745.1	ThuA domain-containing protein			GH151										1024.82	0.841675	0.281895	26.1546	0.000472606	0.000967181	764.559	998.526	1182.5	615.812	1450.76	1043.88	966.712	1370.34
WP_259100270.1	nickel-dependent lactate racemase				Domain of unknown function (DUF2088)	-	-	-	-	-	-	-	DUF2088	1023.79	0.462002	0.207684	12.5296	0.0844345	0.102113	794.269	1170.17	1023.29	877.305	1187.64	1116.75	981.225	1094.1
WP_259097745.1	ferrochelatase	ferrochelatase activity|0004325||IEA	porphyrin-containing compound biosynthetic process|0006779||IEA		Catalyzes the ferrous insertion into protoporphyrin IX	ko:K01772	ko00860,ko01100,ko01110,map00860,map01100,map01110	M00121	R00310,R11329	RC01012	ko00000,ko00001,ko00002,ko01000	-	Ferrochelatase	1017.43	0.15838	0.225954	11.3473	0.124169	0.145206	933.298	1166.5	1121.92	844.378	1138.84	1156.78	811.28	1041.75
WP_259092379.1	ubiquinone/menaquinone biosynthesis methyltransferase	methyltransferase activity|0008168||IEA	isoprenoid biosynthetic process|0008299||IEA		Methyltransferase required for the conversion of demethylmenaquinol (DMKH2) to menaquinol (MKH2)	ko:K03183	ko00130,ko01100,ko01110,map00130,map01100,map01110	M00116,M00117	R04990,R04993,R06859,R08774,R09736	RC00003,RC01253,RC01662	ko00000,ko00001,ko00002,ko01000	-	Ubie_methyltran	1014.64	0.161662	0.242107	52.9187	3.84669e-09	2.00095e-08	1275.29	762.099	1234.88	1156.25	923.091	894.145	487.618	1426.63
WP_259095967.1	type II secretion system F family protein													1013.33	0.079036	0.256212	67.3222	5.12714e-12	3.88844e-11	893.007	454.517	1292.28	1574.93	616.561	886.233	1406.79	943.023
WP_259096538.1	ATP phosphoribosyltransferase	ATP phosphoribosyltransferase activity|0003879||IEA	histidine biosynthetic process|0000105||IEA		Catalyzes the condensation of ATP and 5-phosphoribose 1- diphosphate to form N'-(5'-phosphoribosyl)-ATP (PR-ATP). Has a crucial role in the pathway because the rate of histidine biosynthesis seems to be controlled primarily by regulation of HisG enzymatic activity	ko:K00765	ko00340,ko01100,ko01110,ko01230,map00340,map01100,map01110,map01230	M00026	R01071	RC02819,RC03200	ko00000,ko00001,ko00002,ko01000	-	HisG,HisG_C	1012.81	0.420555	0.16921	87.7311	3.61447e-16	4.07757e-15	938.239	1656.25	762.776	730.807	1038.84	939.84	706.172	1254.9
WP_026307544.1	elongation factor P	translation elongation factor activity|0003746||IEA	translational elongation|0006414||IEA		Involved in peptide bond synthesis. Stimulates efficient translation and peptide-bond synthesis on native or reconstituted 70S ribosomes in vitro. Probably functions indirectly by altering the affinity of the ribosome for aminoacyl-tRNA, thus increasing their reactivity as acceptors for peptidyl transferase	ko:K02356	-	-	-	-	ko00000,ko03012	-	EFP,EFP_N,Elong-fact-P_C	1011.47	0.454733	0.169493	94.022	1.84298e-17	2.36767e-16	895.774	1717.86	637.775	770.037	877.745	1007.58	788.816	1227.03
WP_259097161.1	hypothetical protein													1010.75	-0.488648	0.177762	85.3748	1.09861e-15	1.19457e-14	994.111	983.202	1990.13	1177.32	749.015	934.774	787.984	708.676
WP_259093821.1	NUDIX hydrolase	metal ion binding|0046872||IEA			Hydrolase, NUDIX family	ko:K01515	ko00230,map00230	-	R01054	RC00002	ko00000,ko00001,ko01000	-	NUDIX	1009.82	0.414552	0.219656	18.197	0.0111122	0.0164676	850.492	1302.55	906.812	859.394	1151.75	1086.36	801.019	1133.15
WP_259094580.1	NADH-quinone oxidoreductase subunit L	NADH dehydrogenase (ubiquinone) activity|0008137||IEA	ATP synthesis coupled electron transport|0042773||IEA		NADH-Ubiquinone oxidoreductase (complex I), chain 5 N-terminus	ko:K00341	ko00190,ko01100,map00190,map01100	M00144	R11945	RC00061	ko00000,ko00001,ko00002,ko01000	3.D.1	Proton_antipo_M,Proton_antipo_N	1009.58	0.114942	0.141928	21.7054	0.00285502	0.00488004	932.049	901.439	1046.38	1308.97	1017.67	976.717	898.079	1010.31
WP_259094975.1	O-antigen ligase family protein		lipopolysaccharide biosynthetic process|0009103||IEA											1007.6	-0.000116366	0.272787	53.0871	3.56313e-09	1.86689e-08	862.407	508.667	776.253	1024.26	877.714	1196.34	1832.55	862.228
WP_259096659.1	DUF4091 domain-containing protein			GH123										1007.39	0.769744	0.227994	80.0836	1.32447e-14	1.2853e-13	762.481	519.67	737.351	1504.66	1215.65	1333.61	664.051	1301.04
WP_302898699.1	D-cysteine desulfhydrase family protein	carbon-sulfur lyase activity|0016846||IEA,pyridoxal phosphate binding|0030170||IEA			TIGRFAM pyridoxal phosphate-dependent enzymes, D-cysteine desulfhydrase family	ko:K17950	ko00270,map00270	-	R07634	RC01784	ko00000,ko00001,ko01000	-	PALP	1005.51	0.841914	0.281688	18.993	0.00820927	0.0125894	691.565	1269.44	968.873	774.142	1241.41	1086.14	839.581	1239.32
WP_018196044.1	tyrosine--tRNA ligase	tyrosine-tRNA ligase activity|0004831||IEA	tyrosyl-tRNA aminoacylation|0006437||IEA		Catalyzes the attachment of tyrosine to tRNA(Tyr) in a two-step reaction tyrosine is first activated by ATP to form Tyr- AMP and then transferred to the acceptor end of tRNA(Tyr)	ko:K01866	ko00970,map00970	M00359,M00360	R02918	RC00055,RC00523	ko00000,ko00001,ko00002,ko01000,ko01007,ko03016,ko03029	-	S4,tRNA-synt_1b	999.893	-0.104359	0.127572	17.8118	0.0128486	0.0187559	1034.51	1134.62	794.503	981.568	966.893	1116.98	928.492	962.112
WP_259094647.1	thioredoxin-disulfide reductase	thioredoxin-disulfide reductase activity|0004791||IEA			Pyridine nucleotide-disulphide oxidoreductase	ko:K00384,ko:K03671	ko00450,ko04621,ko05418,map00450,map04621,map05418	-	R02016,R03596,R09372	RC00013,RC02518,RC02873	ko00000,ko00001,ko01000,ko03110	-	Pyr_redox_2	998.889	0.281767	0.185358	42.8654	3.54136e-07	1.31661e-06	907.425	1361.31	962.376	672.074	1132.27	1124.78	760.699	1102.46
WP_018196639.1	inositol monophosphatase family protein				Inositol monophosphatase	ko:K01092	ko00521,ko00562,ko01100,ko04070,map00521,map00562,map01100,map04070	M00131	R01185,R01186,R01187	RC00078	ko00000,ko00001,ko00002,ko01000	-	Inositol_P	998.364	0.572873	0.240744	8.88584	0.260956	0.286251	873.809	847.857	941.911	1004.03	954.628	995.41	1036.19	1299.68
WP_259100694.1	sugar phosphate isomerase/epimerase family protein	catalytic activity|0003824||IEA												997.042	0.728152	0.302055	16.3403	0.0221828	0.0304153	782.62	828.107	1090.44	674.291	1216.39	1019.15	1173.17	1296.42
WP_259092403.1	30S ribosomal protein S12 methylthiotransferase RimO	S-methyltransferase activity|0008172||IEA,transferase activity%2C transferring sulphur-containing groups|0016782||IEA,4 iron%2C 4 sulfur cluster binding|0051539||IEA,S-adenosyl-L-methionine binding|1904047||IEA	peptidyl-L-beta-methylthioaspartic acid biosynthetic process from peptidyl-aspartic acid|0018339||IEA		Catalyzes the methylthiolation of an aspartic acid residue of ribosomal protein S12	ko:K14441	-	-	R10652	RC00003,RC03217	ko00000,ko01000,ko03009	-	Radical_SAM,TRAM,UPF0004	996.902	-0.485278	0.178741	21.8358	0.00271135	0.0046543	1141.23	1081.41	821.281	790.486	1123.2	1041.9	1143.9	815.368
WP_302898742.1	DUF4340 domain-containing protein												glycosyltransferase activity|0016757||IEA	994.254	0.379375	0.20087	24.5978	0.00089395	0.00169908	798.519	1263.05	1201.09	974.874	1053.18	1004.93	708.109	1038.86
WP_259096161.1	ornithine carbamoyltransferase	ornithine carbamoyltransferase activity|0004585||IEA	arginine biosynthetic process via ornithine|0042450||IEA		Reversibly catalyzes the transfer of the carbamoyl group from carbamoyl phosphate (CP) to the N(epsilon) atom of ornithine (ORN) to produce L-citrulline	ko:K00611	ko00220,ko01100,ko01110,ko01130,ko01230,map00220,map01100,map01110,map01130,map01230	M00029,M00844	R01398	RC00096	ko00000,ko00001,ko00002,ko01000	-	OTCace,OTCace_N	993.48	0.085484	0.141353	17.9368	0.0122585	0.0179598	973.783	1197.79	952.787	947.706	971.599	1045.45	804.238	1033.63
WP_018196098.1	SRPBCC family protein				PFAM Polyketide cyclase dehydrase and lipid transport	-	-	-	-	-	-	-	Polyketide_cyc,Polyketide_cyc2	991.486	-0.0980139	0.301923	120.052	7.47231e-23	1.46604e-21	829.987	448.53	285.544	1156.23	578.311	1013.98	2470.85	775.412
WP_259096582.1	c-type cytochrome	electron transfer activity|0009055||IEA,heme binding|0020037||IEA			Cytochrome c	ko:K00406,ko:K16255	ko00190,ko00680,ko01100,ko01120,ko02020,map00190,map00680,map01100,map01120,map02020	M00156	-	-	ko00000,ko00001,ko00002	3.D.4.3	Cytochrom_C,Cytochrome_CBB3	991.046	0.861916	0.318264	25.2155	0.00069486	0.00135812	728.087	822.783	1020.34	619.196	1425.48	1308.74	835.111	1323.21
WP_259095875.1	FAD-binding protein				PFAM fumarate reductase succinate dehydrogenase flavoprotein	ko:K00239,ko:K00244,ko:K17363	ko00020,ko00190,ko00340,ko00620,ko00650,ko00720,ko01100,ko01110,ko01120,ko01130,ko01200,ko02020,ko05134,map00020,map00190,map00340,map00620,map00650,map00720,map01100,map01110,map01120,map01130,map01200,map02020,map05134	M00009,M00011,M00149,M00150,M00173,M00374,M00376	R02164,R10330	RC00045,RC00669	ko00000,ko00001,ko00002,ko01000	-	FAD_binding_2,FMN_bind,FMN_red	988.492	-0.987959	0.230429	81.933	5.55407e-15	5.63208e-14	1112.8	751.514	757.351	1545.48	669.1	750.179	1576.94	561.069
WP_259094562.1	Rid family detoxifying hydrolase	deaminase activity|0019239||IEA	metabolic process|0008152||IEA		Endoribonuclease L-PSP	ko:K09022	-	-	R11098,R11099	RC03275,RC03354	ko00000,ko01000	-	Ribonuc_L-PSP	988.301	0.73483	0.248586	68.9465	2.41153e-12	1.90079e-11	712.529	1613.74	1159.25	566.711	1097.65	1128.46	536.045	1185.45
WP_259101505.1	hypothetical protein													986.969	-0.652094	0.295345	56.2919	8.26433e-10	4.70571e-09	1076.98	2047.85	858.181	694.955	588.459	1043.76	724.702	685.096
WP_259098929.1	hypothetical protein												tryptophan synthase activity|0004834||IEA	984.279	0.29038	0.354095	43.2256	3.01712e-07	1.13575e-06	654.923	1648.09	651.395	662.239	576.183	900.573	1733.08	800.756
WP_259099129.1	hypothetical protein													983.512	-1.42568	0.271931	150.867	2.66904e-29	8.23525e-28	1176.23	420.414	355.52	1528.43	617.672	930.883	2069.65	438.018
WP_259099638.1	Mov34/MPN/PAD-1 family protein				JAB/MPN domain	-	-	-	-	-	-	-	Prok-JAB	981.959	1.0625	0.28213	22.6769	0.00194	0.00343472	621.31	923.448	1180.46	695.87	1159.67	1100.85	1002.04	1297.42
WP_259099053.1	D-aminoacylase	N-acyl-D-amino-acid deacylase activity|0047420||IEA			N-Acyl-D-aspartate D-glutamate deacylase	ko:K06015	-	-	R02192	RC00064,RC00328	ko00000,ko01000	-	Amidohydro_3	981.329	0.51766	0.268959	10.5447	0.15975	0.182441	819.347	724.793	1168.73	935.446	1100.48	1003.03	1028.15	1172.84
WP_259101271.1	flavodoxin-dependent (E)-4-hydroxy-3-methylbut-2-enyl-diphosphate synthase	4-hydroxy-3-methylbut-2-en-1-yl diphosphate synthase activity|0046429||IEA	terpenoid biosynthetic process|0016114||IEA		Converts 2C-methyl-D-erythritol 2,4-cyclodiphosphate (ME-2,4cPP) into 1-hydroxy-2-methyl-2-(E)-butenyl 4-diphosphate	ko:K03526	ko00900,ko01100,ko01110,ko01130,map00900,map01100,map01110,map01130	M00096	R08689,R10859	RC01486	ko00000,ko00001,ko00002,ko01000	-	GcpE	980.799	0.286759	0.244442	4.92492	0.669125	0.681394	816.357	1040.69	1065.83	850.769	1075.49	1018.23	1043.15	995.773
WP_259099615.1	hypothetical protein													977.394	0.494947	0.267603	17.1489	0.016461	0.0234786	821.871	937.545	1103.94	935.423	1187.24	1156.27	630.893	1158.11
WP_259095586.1	TlpA disulfide reductase family protein	oxidoreductase activity|0016491||IEA			SCO1/SenC	-	-	-	-	-	-	-	AhpC-TSA	977.337	0.00406793	0.196559	10.7096	0.151798	0.174297	945.54	915.819	1218.87	913.615	1028.99	1129.21	816.236	948.141
WP_259092317.1	substrate-binding domain-containing protein				COGs COG1879 ABC-type sugar transport system periplasmic component	ko:K10555,ko:K10559	ko02010,ko02024,map02010,map02024	M00219,M00220	-	-	ko00000,ko00001,ko00002,ko02000	3.A.1.2.8,3.A.1.2.9	Peripla_BP_4	977.304	0.0253995	0.2089	30.6904	7.09033e-05	0.000171555	1027.31	704.724	1052.84	644.778	1151.5	1149.82	1125.3	1045.4
WP_259098373.1	DUF3782 domain-containing protein				PD-(D/E)XK nuclease superfamily	-	-	-	-	-	-	-	DUF3782,PDDEXK_10	975.435	0.0635494	0.212984	9.86671	0.196253	0.22016	921.801	972.555	1267.6	1017.46	948.959	1026.3	774.046	963.323
WP_259099278.1	Flp family type IVb pilin													972.33	-0.995502	0.365854	173.022	5.78551e-34	2.37338e-32	836.405	126.756	266.352	1096.73	613.888	1196.39	2867.7	419.612
WP_259095887.1	50S ribosomal protein L20	structural constituent of ribosome|0003735||IEA,rRNA binding|0019843||IEA	translation|0006412||IEA		Binds directly to 23S ribosomal RNA and is necessary for the in vitro assembly process of the 50S ribosomal subunit. It is not involved in the protein synthesizing functions of that subunit	ko:K02887	ko03010,map03010	M00178	-	-	br01610,ko00000,ko00001,ko00002,ko03011	-	Ribosomal_L20	972.198	0.530538	0.219605	31.6085	4.79957e-05	0.000120574	817.12	1446.18	821.064	774.011	893.979	991.47	777.084	1180.22
WP_259096528.1	GTP 3'%2C8-cyclase MoaA	4 iron%2C 4 sulfur cluster binding|0051539||IEA	Mo-molybdopterin cofactor biosynthetic process|0006777||IEA		Catalyzes the cyclization of GTP to (8S)-3',8-cyclo-7,8- dihydroguanosine 5'-triphosphate	ko:K03639	ko00790,ko01100,ko04122,map00790,map01100,map04122	-	R09394	RC03420	ko00000,ko00001,ko01000	-	Fer4_12,Fer4_14,Mob_synth_C,Radical_SAM	970.69	-0.120745	0.159685	12.2369	0.0930331	0.11143	1062.08	846.366	933.588	1159.01	864.95	893.545	981.483	976.879
WP_259093150.1	hydroxyacid dehydrogenase				D-isomer specific 2-hydroxyacid dehydrogenase, catalytic domain	ko:K00058	ko00260,ko00680,ko01100,ko01120,ko01130,ko01200,ko01230,map00260,map00680,map01100,map01120,map01130,map01200,map01230	M00020	R01513	RC00031	ko00000,ko00001,ko00002,ko01000,ko04147	-	2-Hacid_dh,2-Hacid_dh_C,ACT	970.035	0.546493	0.251813	18.528	0.00980186	0.0147498	850.691	873.939	958.208	668.67	1291.12	932.49	1045.42	1242.82
WP_259094425.1	glycosyltransferase family 9 protein	glycosyltransferase activity|0016757||IEA		GT9	heptosyltransferase ii	ko:K02843	ko00540,ko01100,map00540,map01100	M00080	-	-	ko00000,ko00001,ko00002,ko01000,ko01003,ko01005	-	Glyco_transf_9	966.695	-0.31698	0.212948	134.912	5.90791e-26	1.45086e-24	904.703	329.038	672.072	1571.73	833.103	1129.66	1424.25	726.263
WP_259096460.1	threonine/serine dehydratase				Catalyzes the anaerobic formation of alpha-ketobutyrate and ammonia from threonine in a two-step reaction. The first step involved a dehydration of threonine and a production of enamine intermediates (aminocrotonate), which tautomerizes to its imine form (iminobutyrate). Both intermediates are unstable and short- lived. The second step is the nonenzymatic hydrolysis of the enamine imine intermedi…	ko:K01754	ko00260,ko00290,ko01100,ko01110,ko01130,ko01200,ko01230,map00260,map00290,map01100,map01110,map01130,map01200,map01230	M00570	R00220,R00996	RC00418,RC02600	ko00000,ko00001,ko00002,ko01000	-	ACT_4,PALP	966.646	0.273139	0.252325	48.6386	2.67051e-08	1.22342e-07	700.246	811.498	1634.57	603.615	1035.46	1444.41	903.07	845.871
WP_259095301.1	sugar ABC transporter ATP-binding protein	ATP binding|0005524||IEA,ATP hydrolysis activity|0016887||IEA,ATPase-coupled transmembrane transporter activity|0042626||IEA,ABC-type transporter activity|0140359||IEA			ABC-type sugar transport system, ATPase component	ko:K10545	ko02010,map02010	M00215	-	-	ko00000,ko00001,ko00002,ko01000,ko02000	3.A.1.2.4	ABC_tran	966.04	0.696809	0.323614	13.9086	0.0528309	0.0666619	741.552	1070.14	983.714	668.672	1278.44	1088.63	805.397	1201.81
WP_259100971.1	DNA polymerase III subunit beta	DNA-directed DNA polymerase activity|0003887||IEA	DNA replication|0006260||IEA											965.571	0.657095	0.325566	28.3855	0.000187185	0.000418931	673.777	1428.79	796.588	524.527	1329.31	895.807	1078.56	1062.13
WP_259098993.1	GNAT family N-acetyltransferase													965.476	0.655083	0.305857	13.053	0.0708287	0.0867928	739.056	941.67	1246.1	729.618	1201.85	1060.8	813.197	1163.84
WP_259099863.1	5-(carboxyamino)imidazole ribonucleotide synthase	phosphoribosylaminoimidazole carboxylase activity|0004638||IEA,ATP binding|0005524||IEA,metal ion binding|0046872||IEA	'de novo' IMP biosynthetic process|0006189||IEA		Catalyzes the ATP-dependent conversion of 5- aminoimidazole ribonucleotide (AIR) and HCO(3)(-) to N5- carboxyaminoimidazole ribonucleotide (N5-CAIR)	ko:K01589	ko00230,ko01100,ko01110,ko01130,map00230,map01100,map01110,map01130	M00048	R07404	RC01927	ko00000,ko00001,ko00002,ko01000	-	ATP-grasp	965.444	0.238085	0.265062	44.7437	1.53351e-07	6.08348e-07	761.858	1489.06	1470.71	722.273	1156.75	888.91	568.073	898.117
WP_259092728.1	phosphopentomutase	magnesium ion binding|0000287||IEA,phosphopentomutase activity|0008973||IEA	nucleotide metabolic process|0009117||IEA,cellular metabolic compound salvage|0043094||IEA		Phosphotransfer between the C1 and C5 carbon atoms of pentose	ko:K01839	ko00030,ko00230,map00030,map00230	-	R01057,R02749	RC00408	ko00000,ko00001,ko01000	-	Metalloenzyme	962.781	0.138877	0.175542	90.5659	9.46717e-17	1.12794e-15	876.4	505.334	740.151	1083.69	880.122	1001.44	1549.12	964.23
WP_259096564.1	cysteine--tRNA ligase	cysteine-tRNA ligase activity|0004817||IEA	cysteinyl-tRNA aminoacylation|0006423||IEA		Cysteinyl-tRNA synthetase	ko:K01883	ko00970,map00970	M00359,M00360	R03650	RC00055,RC00523	ko00000,ko00001,ko00002,ko01000,ko01007,ko03016	-	DALR_2,tRNA-synt_1e,tRNA-synt_1g	959.583	0.187965	0.168611	12.8423	0.076045	0.0926189	845.325	779.446	989.68	951.285	1053	1040.82	1095.54	962.733
WP_259096751.1	ribonuclease H-like domain-containing protein				RNase_H superfamily	ko:K07502	-	-	-	-	ko00000	-	RNase_H_2	959.272	0.0363523	0.217404	2.73261	0.908588	0.910473	912.222	954.719	925.076	1019.23	1060.12	1029.49	859.948	935.587
WP_018195570.1	Uma2 family endonuclease													958.312	0.254043	0.156233	25.9082	0.000523052	0.00105842	837.84	1247.17	755.058	836.88	942.055	950.529	1025.17	998.618
WP_259094897.1	transcription termination/antitermination protein NusG		DNA-templated transcription termination|0006353||IEA		Participates in transcription elongation, termination and antitermination	ko:K02601	-	-	-	-	ko00000,ko03009,ko03021	-	KOW,NusG	958.308	0.146193	0.193251	90.2904	1.07849e-16	1.2765e-15	804.252	1783.65	1079.32	678.759	908.3	937.33	607.924	890.601
WP_259101963.1	PIN domain-containing protein													955.413	0.412978	0.180684	31.2848	5.50868e-05	0.000136738	797.958	897.269	1369.93	889.093	841.725	1136.87	748.217	1062.52
WP_259096918.1	antibiotic biosynthesis monooxygenase	monooxygenase activity|0004497||IEA			involved in biosynthesis of extracellular polysaccharides	-	-	-	-	-	-	-	ABM	952.722	-0.0696604	0.184432	50.7663	1.0213e-08	5.00258e-08	956.399	1517.68	787.804	775.678	690.145	1037.78	802.74	911.047
WP_259093880.1	branched-chain-amino-acid transaminase	branched-chain-amino-acid transaminase activity|0004084||IEA	branched-chain amino acid biosynthetic process|0009082||IEA		Belongs to the class-IV pyridoxal-phosphate-dependent aminotransferase family	ko:K00826	ko00270,ko00280,ko00290,ko00770,ko01100,ko01110,ko01130,ko01210,ko01230,map00270,map00280,map00290,map00770,map01100,map01110,map01130,map01210,map01230	M00019,M00036,M00119,M00570	R01090,R01214,R02199,R10991	RC00006,RC00036	ko00000,ko00001,ko00002,ko01000,ko01007	-	Aminotran_4	949.64	0.0521418	0.170559	22.1601	0.00238386	0.00413936	902.193	1017.39	738.554	767.754	1000.42	969.183	1213.46	934.724
WP_259092018.1	galactokinase	galactokinase activity|0004335||IEA	galactose metabolic process|0006012||IEA		Catalyzes the transfer of the gamma-phosphate of ATP to D-galactose to form alpha-D-galactose-1-phosphate (Gal-1-P)	ko:K00849	ko00052,ko00520,ko01100,map00052,map00520,map01100	M00554,M00632	R01092	RC00002,RC00078	ko00000,ko00001,ko00002,ko01000,ko04147	-	GHMP_kinases_C,GHMP_kinases_N,GalKase_gal_bdg	949.131	0.393046	0.227461	69.5477	1.82342e-12	1.4531e-11	711.837	1561.9	1074.29	521.933	1355.26	923.105	686.854	934.967
WP_259097024.1	glycoside hydrolase family 52 protein	xylan 1%2C4-beta-xylosidase activity|0009044||IEA	carbohydrate metabolic process|0005975||IEA										glycosyltransferase activity|0016757||IEA	949.123	0.356242	0.255455	36.1449	6.80689e-06	2.02412e-05	779.074	1398.89	1118.98	608.865	1282.03	892.556	682.944	997.239
WP_259098971.1	UvrD-helicase domain-containing protein	ATP binding|0005524||IEA			ATP-dependent DNA helicase activity	ko:K03656,ko:K03657	ko03420,ko03430,map03420,map03430	-	-	-	ko00000,ko00001,ko01000,ko03400	-	UvrD-helicase,UvrD_C	948.917	0.505794	0.206418	57.9058	3.94776e-10	2.34785e-09	776.385	1322.23	1312.8	684.288	1126.67	869.293	578.009	1102.21
WP_018196861.1	ribose-phosphate pyrophosphokinase	magnesium ion binding|0000287||IEA,ribose phosphate diphosphokinase activity|0004749||IEA,ATP binding|0005524||IEA,kinase activity|0016301||IEA	5-phosphoribose 1-diphosphate biosynthetic process|0006015||IEA,ribonucleoside monophosphate biosynthetic process|0009156||IEA,nucleotide biosynthetic process|0009165||IEA,phosphorylation|0016310||IEA		Involved in the biosynthesis of the central metabolite phospho-alpha-D-ribosyl-1-pyrophosphate (PRPP) via the transfer of pyrophosphoryl group from ATP to 1-hydroxyl of ribose-5-phosphate (Rib-5-P)	ko:K00948	ko00030,ko00230,ko01100,ko01110,ko01120,ko01130,ko01200,ko01230,map00030,map00230,map01100,map01110,map01120,map01130,map01200,map01230	M00005	R01049	RC00002,RC00078	ko00000,ko00001,ko00002,ko01000	-	Pribosyl_synth,Pribosyltran_N	948.39	-0.264646	0.135922	108.123	2.25058e-20	3.67628e-19	968.432	1573.22	1069.46	853.365	830.607	789.741	696.88	806.51
WP_259098990.1	DUF885 domain-containing protein				Protein conserved in bacteria	-	-	-	-	-	-	-	DUF885	947.207	0.195716	0.157758	11.2403	0.128474	0.149794	913.963	821.747	822.68	903.368	1071.22	1051.29	947.287	1045.94
WP_259094083.1	COX15/CtaA family protein	oxidoreductase activity%2C acting on the CH-CH group of donors|0016627||IEA	heme A biosynthetic process|0006784||IEA		heme a metabolic process	ko:K02259,ko:K03110	ko00190,ko00860,ko01100,ko01110,ko02020,ko02024,ko03060,ko03070,ko04714,map00190,map00860,map01100,map01110,map02020,map02024,map03060,map03070,map04714	M00154,M00335	R07412	RC00769	ko00000,ko00001,ko00002,ko02044,ko03029	3.A.5.1,3.A.5.2,3.A.5.7,3.D.4.4	COX15-CtaA	946.965	0.61048	0.24289	47.0116	5.55291e-08	2.39212e-07	733.583	1477.41	983.151	524.82	1080.46	960.06	753.526	1119.28
WP_259097049.1	CvpA family protein													946.698	0.808991	0.259941	47.1267	5.27322e-08	2.28802e-07	647.005	1470.23	778.944	501.169	878.583	1008.51	1077.79	1132.73
WP_259100116.1	ATP-dependent Clp endopeptidase proteolytic subunit ClpP	ATP-dependent peptidase activity|0004176||IEA,serine-type endopeptidase activity|0004252||IEA	proteolysis|0006508||IEA		serine-type endopeptidase activity	ko:K01358	ko04112,ko04212,map04112,map04212	-	-	-	ko00000,ko00001,ko01000,ko01002	-	CLP_protease	946.363	0.409178	0.216289	9.77012	0.201979	0.225812	830.822	1032.22	798.666	781.86	1030.72	999.445	973.657	1102.39
WP_259099307.1	LCP family protein		cell wall assembly|0070726||IEA		Cell envelope-like function transcriptional attenuator common domain protein	-	-	-	-	-	-	-	LytR_cpsA_psr	946.28	-0.144836	0.143313	22.1366	0.00240622	0.00417417	917.217	821.796	911.652	1141.36	833.304	963.75	1102.81	829.155
WP_259094987.1	glutamate-1-semialdehyde 2%2C1-aminomutase	glutamate-1-semialdehyde 2%2C1-aminomutase activity|0042286||IEA	porphyrin-containing compound biosynthetic process|0006779||IEA		PFAM Aminotransferase class-III	ko:K01845	ko00860,ko01100,ko01110,ko01120,map00860,map01100,map01110,map01120	M00121	R02272	RC00677	ko00000,ko00001,ko00002,ko01000,ko01007	-	Aminotran_3	945.487	0.439621	0.22092	124.343	9.53393e-24	2.00102e-22	721.179	1977.85	969.354	554.884	1179.62	794.442	474.396	978.169
WP_259099246.1	thioredoxin family protein													944.845	0.0816792	0.185706	6.47384	0.485633	0.505809	938.341	1059.84	875.205	911.572	759.916	997.756	938.268	993.004
WP_259093662.1	Gfo/Idh/MocA family oxidoreductase	oxidoreductase activity|0016491||IEA,oxidoreductase activity%2C acting on NAD(P)H|0016651||IEA												942.477	0.80587	0.253464	54.8753	1.5782e-09	8.64535e-09	827.885	837.159	798.433	643.499	1517.83	1074.15	536.503	1448.13
WP_259095555.1	hypothetical protein												pyrophosphatase activity|0016462||IEA	942.423	0.0550595	0.193464	31.1996	5.71177e-05	0.000141326	835.171	1274.92	1219.16	735.493	726.849	870.45	1029.55	868.189
WP_259094291.1	CpaF family protein				Type II/IV secretion system protein	ko:K02283	-	-	-	-	ko00000,ko02035,ko02044	-	T2SSE	942.116	0.377465	0.272524	23.4767	0.00140743	0.00256996	832.713	781.66	1059.93	549.424	1298.11	1064.51	1026.74	1081.77
WP_259093181.1	pyridoxal phosphate-dependent aminotransferase	transaminase activity|0008483||IEA,pyridoxal phosphate binding|0030170||IEA	biosynthetic process|0009058||IEA		Evidence 3 Function proposed based on presence of conserved amino acid motif, structural feature or limited homology	ko:K00812	ko00220,ko00250,ko00270,ko00330,ko00350,ko00360,ko00400,ko00401,ko00950,ko00960,ko01100,ko01110,ko01130,ko01210,ko01230,map00220,map00250,map00270,map00330,map00350,map00360,map00400,map00401,map00950,map00960,map01100,map01110,map01130,map01210,map01230	-	R00355,R00694,R00734,R00896,R02433,R02619,R05052	RC00006	ko00000,ko00001,ko01000,ko01007	-	Aminotran_1_2	941.096	0.594393	0.248973	18.3737	0.010393	0.0155101	765.173	934.582	1081.39	847.935	1283.75	940.258	681.806	1154.85
WP_259100771.1	hypothetical protein													940.027	0.653302	0.181521	52.1047	5.56767e-09	2.83089e-08	839.733	1080.31	1071.52	663.716	919.359	1018.53	643.616	1320.38
WP_259094379.1	hypothetical protein													939.244	0.379124	0.196345	13.7121	0.0565451	0.070927	825.353	777.022	936.669	961.903	1212.43	967.936	848.883	1073.96
WP_259095831.1	TldD/PmbA family protein	zinc ion binding|0008270||IEA	proteolysis|0006508||IEA		Putative modulator of DNA gyrase	ko:K03568	-	-	-	-	ko00000,ko01002	-	PmbA_TldD	938.339	0.161344	0.249967	18.1722	0.0112167	0.0166021	828.118	987.92	1285.89	629.985	1154.97	1014.18	867.798	925.91
WP_259097204.1	VWA domain-containing protein				von Willebrand factor, type A	ko:K07114	-	-	-	-	ko00000,ko02000	1.A.13.2.2,1.A.13.2.3	BatA,VWA	936.577	-0.0361165	0.225913	9.17704	0.240194	0.265249	1046.89	857.64	816.576	1091.76	780.294	989.281	797.019	1021.05
WP_020249968.1	NADH-quinone oxidoreductase subunit N	NADH dehydrogenase (ubiquinone) activity|0008137||IEA,oxidoreductase activity%2C acting on NAD(P)H%2C quinone or similar compound as acceptor|0016655||IEA,quinone binding|0048038||IEA,NADH dehydrogenase (quinone) activity|0050136||IEA			NDH-1 shuttles electrons from NADH, via FMN and iron- sulfur (Fe-S) centers, to quinones in the respiratory chain. The immediate electron acceptor for the enzyme in this species is believed to be a menaquinone. Couples the redox reaction to proton translocation (for every two electrons transferred, four hydrogen ions are translocated across the cytoplasmic membrane), and thus conserves the redox …	ko:K00343	ko00190,ko01100,map00190,map01100	M00144	R11945	RC00061	ko00000,ko00001,ko00002,ko01000	3.D.1	Proton_antipo_M	933.862	0.667051	0.31107	22.7145	0.00191106	0.00339013	736.821	1132.17	1209.26	521.902	1088.58	985.613	769.942	1169.98
WP_259098576.1	retropepsin-like aspartic protease	aspartic-type endopeptidase activity|0004190||IEA	proteolysis|0006508||IEA											933.643	0.585735	0.250201	41.1312	7.63958e-07	2.67237e-06	762.281	557.431	1219.06	1255.03	932.755	1071.65	621.483	1144.29
WP_259097378.1	fumarylacetoacetate hydrolase family protein	catalytic activity|0003824||IEA			COG0179 2-keto-4-pentenoate hydratase 2-oxohepta-3-ene-1,7-dioic acid hydratase (catechol pathway)	-	-	-	-	-	-	-	FAA_hydrolase	930.268	0.224576	0.224977	10.6425	0.154989	0.17751	864.349	972.903	762.905	730.949	1136.36	1014.13	964.024	1009.43
WP_259096041.1	TerC family protein				Integral membrane protein TerC family	ko:K05794	-	-	-	-	ko00000	-	TerC	929.578	-0.769066	0.198646	28.8211	0.000155966	0.000353667	1115.9	991.215	979.412	1069.25	762.355	1090.43	733.683	655.248
WP_259093957.1	M55 family metallopeptidase				D-aminopeptidase	ko:K16203	-	-	-	-	ko00000,ko01000,ko01002	3.A.1.5.2	Peptidase_M55	928.519	0.23031	0.165559	21.2888	0.0033654	0.00565864	802.935	1103.76	1172.5	821.588	901.192	771.079	985.877	941.439
WP_259091889.1	PIG-L family deacetylase	deacetylase activity|0019213||IEA												925.538	0.644166	0.253871	18.0294	0.0118381	0.0174289	651.439	876.965	1281.09	749.671	972.472	884.22	1104.9	1017.71
WP_259095393.1	thioredoxin	disulfide oxidoreductase activity|0015036||IEA			Thioredoxin	ko:K03671	ko04621,ko05418,map04621,map05418	-	-	-	ko00000,ko00001,ko03110	-	Thioredoxin	924.296	0.101238	0.21366	47.1757	5.1583e-08	2.24626e-07	761.932	1299.74	639.194	915.333	631.082	804.34	1332.89	817.087
WP_259092847.1	ArsA family ATPase				Anion-transporting ATPase	ko:K01551	-	-	-	-	ko00000,ko01000,ko02000	3.A.19.1,3.A.21.1,3.A.4.1	ArsA_ATPase	923.191	-0.0555388	0.154235	12.1949	0.0943302	0.112871	982.662	816.173	757.417	1024.01	817.236	954.253	997.664	945.535
WP_259096838.1	3-hydroxyacyl-ACP dehydratase FabZ				Involved in unsaturated fatty acids biosynthesis. Catalyzes the dehydration of short chain beta-hydroxyacyl-ACPs and long chain saturated and unsaturated beta-hydroxyacyl-ACPs	ko:K02372	ko00061,ko00780,ko01100,ko01212,map00061,map00780,map01100,map01212	M00083,M00572	R04428,R04535,R04537,R04544,R04568,R04954,R04965,R07764,R10117,R10121	RC00831,RC01095	ko00000,ko00001,ko00002,ko01000,ko01004	-	FabA	922.614	0.574197	0.182779	24.114	0.00108796	0.00203288	714.134	823.703	754.191	874.695	867.544	1122.51	1087.32	1062.32
WP_259100430.1	hypothetical protein													922.019	0.553991	0.381752	13.1337	0.0689174	0.0847095	753.273	1015.92	945.866	496.278	1211.89	1003.1	948.651	1105.75
WP_259096914.1	amidohydrolase family protein	hydrolase activity|0016787||IEA			imidazolonepropionase activity	ko:K01443	ko00520,ko01130,map00520,map01130	-	R02059	RC00166,RC00300	ko00000,ko00001,ko01000	-	Amidohydro_1,Amidohydro_3	920.184	0.254918	0.225874	91.3399	6.56424e-17	8.08768e-16	694.567	1567.06	1434.55	534.504	1130.92	888.798	523.524	829.245
[truncated: 2,598 more rows]

## Sheet: Table S5. Proteomics
Table S5. Proteome data from F. sacchari PD1T grown on five different polysaccharides.
protein_id	product	go_function	go_process	dbCAN	rn	pval	adj_pval	f_statistic	df1	df2	avg_abundance	n_approx	n_obs	Beta-glucan	Gellan gum	Locust bean gum	Starch	Xanthan gum
[truncated: 2,580 more rows]

## Sheet: Table S6. GH alignments
Table S6. Protein alignment of all F. sacchari PD1T enzymes annotated to have GH109, GH177, and GH179 domains, along with biochemically characterized reference enzymes.
[truncated: 2,680 more rows]

[truncated: 16 more sheets: Table S7. Metaproteomics, Table S8. Synthetic DNA, Table S9. Outgroup genome data, Table S10.Fervidi genomes, Table S11. Phenotype comparison, Table S12. Flagella_chemotaxis, Table S13. Secretion systems, Table S14. Type-2 secretion, Table S15. Type-4 pili, Table S16. Tad complexes, Table S17. Signal Transduction, Table S18. ANI and AAI, Table S19. SeqCode names, Table S20. Bac120 models, Table S21. UBCG2 models, Table S22. bcgTree models]
